# Supplementary material for: Chemoproteomics Reveals USP5 (Ubiquitin Carboxyl-Terminal Hydrolase 5) as Promising Target of the Marine Polyketide Gracilioether A
Source: Mar Drugs. 2024 Jan 11;22(1):41. doi: 10.3390/md22010041 (PMC10817451; doi:10.3390/md22010041)
Supplement: Supplementary file 1 [file marinedrugs-22-00041-s001.zip › SI_PD tables.xlsx]

## Sheet: Replicate a
Checked	Protein FDR Confidence: Combined	Master	Accession	Description	Exp. q-value: Combined	Sum PEP Score	Coverage [%]	# Peptides	# PSMs	# Unique Peptides	# AAs	MW [kDa]	calc. pI	Score MSPepSearch: MSPepSearch	Score Sequest HT: Sequest HT	# Peptides (by Search Engine): MSPepSearch	# Peptides (by Search Engine): Sequest HT	# Protein Pathway Groups	# Razor Peptides	Abundance Ratio: (B5_D4_100uM_1a500) / (B5_D4_CTRL_1a500)	Abundance Ratio: (B5_D4_10uM_1a500) / (B5_D4_CTRL_1a500)	Abundance Ratio: (B5_D4_1uM_1a500) / (B5_D4_CTRL_1a500)	Abundance Ratio: (B5_D4_lisato) / (B5_D4_CTRL_1a500)	Abundance Ratio Adj. P-Value: (B5_D4_100uM_1a500) / (B5_D4_CTRL_1a500)	Abundance Ratio Adj. P-Value: (B5_D4_10uM_1a500) / (B5_D4_CTRL_1a500)	Abundance Ratio Adj. P-Value: (B5_D4_1uM_1a500) / (B5_D4_CTRL_1a500)	Abundance Ratio Adj. P-Value: (B5_D4_lisato) / (B5_D4_CTRL_1a500)	Abundance Ratio Variability [%]: (B5_D4_100uM_1a500) / (B5_D4_CTRL_1a500)	Abundance Ratio Variability [%]: (B5_D4_10uM_1a500) / (B5_D4_CTRL_1a500)	Abundance Ratio Variability [%]: (B5_D4_1uM_1a500) / (B5_D4_CTRL_1a500)	Abundance Ratio Variability [%]: (B5_D4_lisato) / (B5_D4_CTRL_1a500)	Abundances (Grouped): B5_D4_100uM_1a500	Abundances (Grouped): B5_D4_10uM_1a500	Abundances (Grouped): B5_D4_1uM_1a500	Abundances (Grouped): B5_D4_CTRL_1a500	Abundances (Grouped): B5_D4_lisato	Found in Sample: [S3] F3: Sample, B5_D4_100uM_1a500	Found in Sample: [S2] F2: Sample, B5_D4_10uM_1a500	Found in Sample: [S1] F1: Sample, B5_D4_1uM_1a500	Found in Sample: [S4] F4: Sample, B5_D4_CTRL_1a500	Found in Sample: [S9] F9: Sample, B5_D4_lisato	# Protein Groups	Modifications
FALSE	High	Master Protein	P21333	Filamin-A OS=Homo sapiens OX=9606 GN=FLNA PE=1 SV=4	0	816.784	58	135	1145	117	2647	280.6	6.06	515010		135		0	19	0.535	0.909	0.991	0.084	0.977307	0.966518	0.932939	0.662398	93.81	32.73	35.22	49.82	113	105.2	92.2	97.8	10.2	High	High	High	High	High	1
FALSE	High	Master Protein	P35579	Myosin-9 OS=Homo sapiens OX=9606 GN=MYH9 PE=1 SV=4	0	593.706	55	122	689	122	1960	226.4	5.6	290145		122		0	0	0.195	0.876	0.714	0.024	0.49555	0.948794	0.468624	0.359389	61.21	23.25	68.34	62.87	49	176.1	143.3	210.7	3.5	High	High	High	High	High	1
FALSE	High	Master Protein	P13639	Elongation factor 2 OS=Homo sapiens OX=9606 GN=EEF2 PE=1 SV=4	0	593.57	66	77	897	75	858	95.3	6.83	466523		77		0	2	3.801	3.889	2.021	7.077	0.594866	0.0186329	0.307713	0.68769	42.22	36.39	78.99	34.97	117	112.5	65.1	27.2	209.9	High	High	High	High	High	1
FALSE	High	Master Protein	O75369	Filamin-B OS=Homo sapiens OX=9606 GN=FLNB PE=1 SV=2	0	584.027	52	115	801	101	2602	278	5.73	337537		115		0	3	0.347	0.746	0.861	0.027	0.832321	0.826764	0.778996	0.387594	45.91	29.99	42	79.76	73.3	121.1	123.4	182.7	12.4	High	High	High	High	High	1
FALSE	High	Master Protein	P18206	Vinculin OS=Homo sapiens OX=9606 GN=VCL PE=1 SV=4	0	561.275	56	84	812	84	1134	123.7	5.66	403808		84		0	0	0.549	0.789	0.809	0.021	0.977307	0.862913	0.672159	0.329064	28.34	23.02	47.78	30.54	82.9	122.4	119.7	153.3	3.7	High	High	High	High	High	1
FALSE	High	Master Protein	P46940	Ras GTPase-activating-like protein IQGAP1 OS=Homo sapiens OX=9606 GN=IQGAP1 PE=1 SV=1	0	561.204	51	87	823	84	1657	189.1	6.48	398448		87		0	4	2.056	1.302	1.186	0.832	0.911728	0.93297	0.987625	0.999163	86.36	37.62	73.19	94.19	122.6	87.4	90.1	77.6	45.3	High	High	High	High	High	1
FALSE	High	Master Protein	P08238	Heat shock protein HSP 90-beta OS=Homo sapiens OX=9606 GN=HSP90AB1 PE=1 SV=4	0	554.778	74	73	696	40	724	83.2	5.03	348374		73		0	38	9.547	4.985	3.489	20.161	0.171591	0.00350989	0.0114903	0.424907	40.9	40.06	38.64	47.31	135.4	71.5	44.8	13.4	308.7	High	High	High	High	High	1
FALSE	High	Master Protein	P14625	Endoplasmin OS=Homo sapiens OX=9606 GN=HSP90B1 PE=1 SV=1	0	538.382	69	74	662	71	803	92.4	4.84	331820		74		0	5	12.367	5.914	3.448	18.211	0.103117	0.000966399	0.0126346	0.452838	40.57	41.79	75.15	35.71	145.3	68.6	44.1	10.6	219.6	High	High	High	High	High	1
FALSE	High	Master Protein	P04264	Keratin, type II cytoskeletal 1 OS=Homo sapiens OX=9606 GN=KRT1 PE=1 SV=6	0	536.761	72	90	654	75	644	66	8.12	317489		90		0	15	0.36	0.46	0.531	0.129	0.85172	0.220889	0.119602	0.749465	67.74	57.15	58.18	48.69	48.2	60	75.4	151.6	16.8	High	High	High	High	High	1
FALSE	High	Master Protein	P49327	Fatty acid synthase OS=Homo sapiens OX=9606 GN=FASN PE=1 SV=3	0	503.17	42	94	680	94	2511	273.3	6.44	303570		94		0	0	0.214	0.755	0.74	0.012	0.549568	0.826764	0.527083	0.216849	29.21	28.51	44.29	117.96	48.1	158.7	158	220.6	4.5	High	High	High	High	High	1
FALSE	High	Master Protein	P07900	Heat shock protein HSP 90-alpha OS=Homo sapiens OX=9606 GN=HSP90AA1 PE=1 SV=5	0	499.7	71	69	618	39	732	84.6	5.02	309623		69		0	0	11.656	4.904	3.311	19.5	0.116453	0.00396691	0.0168431	0.434091	28.47	42.3	41.25	35.04	145.5	65.8	40.6	12.1	242.5	High	High	High	High	High	1
FALSE	High	Master Protein	O43707	Alpha-actinin-4 OS=Homo sapiens OX=9606 GN=ACTN4 PE=1 SV=2	0	468.517	72	70	771	44	911	104.8	5.44	336001		70		0	28	0.657	0.641	0.813	0.353	0.999286	0.609824	0.682496	0.941386	29.4	36.89	41.88	34.12	96.9	92	118.6	141.8	54.4	High	High	High	High	High	1
FALSE	High	Master Protein	P55072	Transitional endoplasmic reticulum ATPase OS=Homo sapiens OX=9606 GN=VCP PE=1 SV=4	0	456.777	67	72	638	72	806	89.3	5.26	294231		72		0	0	2.067	2.133	2.388	1.371	0.909077	0.342336	0.137164	0.978392	41.82	40.91	44.94	45.92	123.9	125.6	131.5	59.1	98.5	High	High	High	High	High	1
FALSE	High	Master Protein	P12814	Alpha-actinin-1 OS=Homo sapiens OX=9606 GN=ACTN1 PE=1 SV=2	0	382.535	73	66	569	40	892	103	5.41	253559		66		0	0	0.607	0.485	0.654	0.391	0.988291	0.271915	0.330763	0.962741	30.22	38.85	73.82	36.89	102.5	75.6	118.9	158.5	62	High	High	High	High	High	1
FALSE	High	Master Protein	P35527	Keratin, type I cytoskeletal 9 OS=Homo sapiens OX=9606 GN=KRT9 PE=1 SV=3	0	368.397	81	66	479	65	623	62	5.24	224964		66		0	1	0.508	0.62	0.728	0.18	0.966397	0.564742	0.502859	0.810082	44.76	49.54	80.84	71.06	53.3	61.3	71.5	97.9	16.4	High	High	High	High	High	1
FALSE	High	Master Protein	Q14697	Neutral alpha-glucosidase AB OS=Homo sapiens OX=9606 GN=GANAB PE=1 SV=3	0	358.105	48	62	433	2	944	106.8	6.14	223346		62		0	67	3.286	1.087	1.738	2.903	0.689287	0.991485	0.541135	0.854619	52.4	44.3	48.2	52.37	205.7	62	101.3	59	211.6	High	High	Peak Found	Peak Found	High	1
FALSE	High	Master Protein	P78527	DNA-dependent protein kinase catalytic subunit OS=Homo sapiens OX=9606 GN=PRKDC PE=1 SV=3	0	357.201	25	102	426	101	4128	468.8	7.12	172126		102		0	1	1.368	1.357	1.272	0.375	0.999286	0.896039	0.954707	0.956382	69.2	54.01	64.62	121.58	116.1	111.5	101.6	102.1	30.5	High	High	High	High	High	1
FALSE	High	Master Protein	Q14697-2	Isoform 2 of Neutral alpha-glucosidase AB OS=Homo sapiens OX=9606 GN=GANAB	0	345.636	47	61	421	1	966	109.4	6.24	220269		61		0	0	100		100	100	5.33141e-17		5.41217e-17	3.00121e-17					214.8		361.4		125.6	Peak Found	Not Found	High	Not Found	High	1
FALSE	High	Master Protein	P26639	Threonine--tRNA ligase 1, cytoplasmic OS=Homo sapiens OX=9606 GN=TARS1 PE=1 SV=3	0	343.636	59	51	578	51	723	83.4	6.67	281481		51		0	0	2.022	1.698	1.639	1.228	0.916708	0.63904	0.637416	0.982616	21.6	23.76	41.63	31.18	133.1	109.7	108	63.7	83.9	High	High	High	High	High	1
FALSE	High	Master Protein	Q8WUM4	Programmed cell death 6-interacting protein OS=Homo sapiens OX=9606 GN=PDCD6IP PE=1 SV=1	0	328.051	54	52	531	52	868	96	6.52	256319		52		0	0	1	1.007	1.117	0.588	0.999286	0.986398	0.997039	0.982616	20.98	26.57	35.48	19.56	107.8	103.5	123.1	106.8	65	High	High	High	High	High	1
FALSE	High	Master Protein	P13645	Keratin, type I cytoskeletal 10 OS=Homo sapiens OX=9606 GN=KRT10 PE=1 SV=6	0	318.648	56	60	389	47	584	58.8	5.21	181563		60		0	16	0.271	0.326	0.556	0.098	0.699743	0.041174	0.151355	0.708087	69.03	52.22	55.09	43.82	48.1	62.8	94.6	214.9	20	High	High	High	High	High	1
FALSE	High	Master Protein	A0A087WVQ6	Clathrin heavy chain OS=Homo sapiens OX=9606 GN=CLTC PE=1 SV=1	0	297.137	39	62	343	62	1679	191.9	5.69	171740		62		0	0	0.336	0.971	0.873	0.063	0.823523	0.986398	0.802166	0.593491	27.27	23.59	40.35	58.31	61.5	170.4	155.8	187	12.6	High	High	High	High	High	1
FALSE	High	Master Protein	Q14204	Cytoplasmic dynein 1 heavy chain 1 OS=Homo sapiens OX=9606 GN=DYNC1H1 PE=1 SV=5	0	284.832	19	90	296	89	4646	532.1	6.4	110253		90		0	0	0.312	1.047	0.951	0.079	0.781988	0.997378	0.89873	0.65111	90.37	32.16	42.25	124.12	66.9	171.9	153.9	166.8	12.7	High	High	High	High	Peak Found	1
FALSE	High	Master Protein	P31327	Carbamoyl-phosphate synthase [ammonia], mitochondrial OS=Homo sapiens OX=9606 GN=CPS1 PE=1 SV=2	0	281.806	42	62	385	59	1500	164.8	6.74	158397		62		0	3	0.361	0.924	0.893	0.038	0.853807	0.976437	0.827984	0.469388	43.56	26.62	48.8	48.43	64	161.3	145.9	185.2	7.1	High	High	High	High	High	1
FALSE	High	Master Protein	P22314	Ubiquitin-like modifier-activating enzyme 1 OS=Homo sapiens OX=9606 GN=UBA1 PE=1 SV=3	0	273.114	43	47	372	47	1058	117.8	5.76	174324		47		0	0	1.45	1.432	2.023	0.124	0.988291	0.858154	0.306826	0.745538	35.91	46.07	43.8	24.24	113.7	106	160.8	83.1	11.6	High	High	High	High	High	1
FALSE	High	Master Protein	P05023	Sodium/potassium-transporting ATPase subunit alpha-1 OS=Homo sapiens OX=9606 GN=ATP1A1 PE=1 SV=1	0	271.198	43	46	444	33	1023	112.8	5.49	214193		46		0	17	0.824	0.964	1.145	0.596	0.999286	0.986398	0.99817	0.982616	26.49	16.65	31.05	20.04	97	108.6	117.2	116.6	71	High	High	High	High	High	1
FALSE	High	Master Protein	P35908	Keratin, type II cytoskeletal 2 epidermal OS=Homo sapiens OX=9606 GN=KRT2 PE=1 SV=2	0	269.85	72	58	299	40	639	65.4	8	144180		58		0	8	0.27	0.645	0.643	0.19	0.697242	0.617682	0.307134	0.821277	44.39	36.76	57.56	49.91	30.5	72.3	81.6	132.7	21.2	High	High	High	High	High	1
FALSE	High	Master Protein	Q13200	26S proteasome non-ATPase regulatory subunit 2 OS=Homo sapiens OX=9606 GN=PSMD2 PE=1 SV=3	0	269.697	52	47	402	47	908	100.1	5.2	197238		47		0	0	1.389	0.999	1.039	1.046	0.999198	0.986398	0.963133	0.984447	28.7	29.03	59.71	24.83	114.5	82.5	85.8	85.7	82.5	High	High	High	High	High	1
FALSE	High	Master Protein	P07814	Bifunctional glutamate/proline--tRNA ligase OS=Homo sapiens OX=9606 GN=EPRS1 PE=1 SV=5	0	269.172	37	58	335	57	1512	170.5	7.33	144969		58		0	1	2.554	1.791	1.425	0.161	0.830002	0.56612	0.856786	0.798961	34.53	45.86	80.05	59.21	137	103.6	75.1	53.2	12.8	High	High	High	High	High	1
FALSE	High	Master Protein	P19367	Hexokinase-1 OS=Homo sapiens OX=9606 GN=HK1 PE=1 SV=3	0	267.343	51	50	382	43	917	102.4	6.8	204727		50		0	11	0.942	0.673	1.04	0.601	0.999286	0.678012	0.963611	0.982616	25.04	19.17	42.74	29.93	109.5	76.1	116.8	113.2	71.5	High	High	High	High	High	1
FALSE	High	Master Protein	Q01813	ATP-dependent 6-phosphofructokinase, platelet type OS=Homo sapiens OX=9606 GN=PFKP PE=1 SV=2	0	265.498	51	45	414	37	784	85.5	7.55	184868		45		0	11	1.751	1.887	1.561	1.484	0.962576	0.490209	0.718821	0.971083	28.13	46.61	59.43	32.19	121.2	131	112.7	69.5	105	High	High	High	High	High	1
FALSE	High	Master Protein	Q09666	Neuroblast differentiation-associated protein AHNAK OS=Homo sapiens OX=9606 GN=AHNAK PE=1 SV=2	0	265.047	31	74	177	74	5890	628.7	6.15	65536		74		0	0	2.36	1.391	0.942	2.263	0.868081	0.873487	0.895215	0.90445	87.69	66.03	50.44	73.06	162.9	131.9	84.6	59.1	158.6	High	High	High	High	High	1
FALSE	High	Master Protein	Q9Y490	Talin-1 OS=Homo sapiens OX=9606 GN=TLN1 PE=1 SV=3	0	255.671	32	66	270	60	2541	269.6	6.07	106255		66		0	7	0.349	0.9	0.867	0.055	0.832631	0.961881	0.786889	0.561597	56.69	21.05	33.29	102.97	58.4	165	155.1	202.4	5.5	High	High	High	High	Peak Found	1
FALSE	High	Master Protein	E9PLK3	Aminopeptidase OS=Homo sapiens OX=9606 GN=NPEPPS PE=1 SV=1	0	245.214	51	45	390	45	915	102.9	5.6	196320		45		0	0	0.785	0.576	1.022	0.442	0.999286	0.462552	0.954707	0.971083	18.97	13.33	35.45	22	105.9	67.8	128.6	133.5	57.7	High	High	High	High	High	1
FALSE	High	Master Protein	P35606	Coatomer subunit beta' OS=Homo sapiens OX=9606 GN=COPB2 PE=1 SV=2	0	241.808	52	44	362	44	906	102.4	5.27	195508		44		0	0	0.7	0.915	0.829	0.459	0.999286	0.97237	0.711411	0.974785	22.58	26.68	43.91	25.65	94.2	110.3	110.1	123.9	57.1	High	High	High	High	High	1
FALSE	High	Master Protein	Q92900	Regulator of nonsense transcripts 1 OS=Homo sapiens OX=9606 GN=UPF1 PE=1 SV=2	0	233.897	49	53	310	53	1129	124.3	6.61	137119		53		0	0	0.773	0.971	0.978	0.05	0.999286	0.986398	0.92938	0.538977	23.66	33.2	35.92	29.88	103.4	113.1	122.1	126.8	5.8	High	High	High	High	High	1
FALSE	High	Master Protein	Q16531	DNA damage-binding protein 1 OS=Homo sapiens OX=9606 GN=DDB1 PE=1 SV=1	0	232.437	38	41	285	41	1140	126.9	5.26	147361		41		0	0	0.354	0.968	0.916	0.073	0.840005	0.986398	0.865871	0.629478	32.29	24.86	33.36	57.62	68.3	154.2	153.3	176.9	20.2	High	High	High	High	High	1
FALSE	High	Master Protein	A2A274	Aconitate hydratase, mitochondrial OS=Homo sapiens OX=9606 GN=ACO2 PE=1 SV=1	0	229.466	50	41	314	41	805	87.8	7.37	149923		41		0	0	1.062	1.196	1.223	0.676	0.999286	0.982133	0.976584	0.988414	27.05	24.69	41.13	26.79	105.7	109.8	109.5	96.4	64	High	High	High	High	High	1
FALSE	High	Master Protein	Q14974	Importin subunit beta-1 OS=Homo sapiens OX=9606 GN=KPNB1 PE=1 SV=2	0	225.463	43	36	305	36	876	97.1	4.78	126770		36		0	0	2.804	1.4	1.303	2.991	0.785038	0.870324	0.9361	0.848158	31.11	36.16	65.06	41.76	132.3	62.5	58.5	46.8	153.7	High	High	High	High	High	1
FALSE	High	Master Protein	P06737	Glycogen phosphorylase, liver form OS=Homo sapiens OX=9606 GN=PYGL PE=1 SV=4	0	224.952	50	47	328	39	847	97.1	7.17	151550		47		0	8	1.155	1.136	0.983	0.779	0.999286	0.986398	0.929571	0.999163	21.27	17.88	31.14	18.77	111.8	101.2	93.4	92.3	74.6	High	High	High	High	High	1
FALSE	High	Master Protein	P33991	DNA replication licensing factor MCM4 OS=Homo sapiens OX=9606 GN=MCM4 PE=1 SV=5	0	219.751	43	35	268	35	863	96.5	6.74	132617		35		0	0	7.86	6.287	4.836	7	0.235157	0.000583644	0.00057139	0.689596	35.32	24.53	67.93	31.37	166.9	116.4	103.6	25.6	143.6	High	High	High	High	High	1
FALSE	High	Master Protein	P55060	Exportin-2 OS=Homo sapiens OX=9606 GN=CSE1L PE=1 SV=3	0	216.6	39	43	182	43	971	110.3	5.77	80747		43		0	0	8.61	8.19	5.474	37.942	0.205423	5.45187e-05	0.000150607	0.279345	29.75	30.86	36.82	25.16	103.1	92.5	64.3	9.2	463.9	High	High	High	High	High	1
FALSE	High	Master Protein	P13647	Keratin, type II cytoskeletal 5 OS=Homo sapiens OX=9606 GN=KRT5 PE=1 SV=3	0	216.083	53	47	246	25	590	62.3	7.74	117179		47		0	2	0.16	0.27	0.315	0.07	0.395904	0.0131273	0.00267554	0.619265	85.95	64.45	77.28	59.04	34	56.7	66.4	319.4	25.4	High	High	High	High	High	1
FALSE	High	Master Protein	P02538	Keratin, type II cytoskeletal 6A OS=Homo sapiens OX=9606 GN=KRT6A PE=1 SV=3	0	212.105	53	50	238	6	564	60	8	114088		50		0	33	0.156	0.341	0.151	0.049	0.378539	0.0527152	4.394e-07	0.536308	86.5	68.1	115.42	85.08	24.7	81.4	40.2	511.3	12.6	High	High	High	High	High	1
FALSE	High	Master Protein	P47897	Glutamine--tRNA ligase OS=Homo sapiens OX=9606 GN=QARS1 PE=1 SV=1	0	210.684	54	40	207	39	775	87.7	7.15	101854		40		0	0	7.809	5.474	3.51	18.852	0.236957	0.00174818	0.0110018	0.441917	57.16	28.33	66.45	40.46	143.5	80.5	54.3	13.2	291.8	High	High	High	Peak Found	High	1
FALSE	High	Master Protein	Q14566	DNA replication licensing factor MCM6 OS=Homo sapiens OX=9606 GN=MCM6 PE=1 SV=1	0	206.443	48	39	139	39	821	92.8	5.41	68451		39		0	0	9.913	4.286	3.941	46.584	0.160507	0.00996059	0.00402639	0.237634	34.3	21.49	27.78	33.98	111.9	43.2	35.8	8	511.6	High	High	High	High	High	1
FALSE	High	Master Protein	P49736	DNA replication licensing factor MCM2 OS=Homo sapiens OX=9606 GN=MCM2 PE=1 SV=4	0	205.553	35	33	213	33	904	101.8	5.52	110821		33		0	0	6.086	3.199	1.83	1.185	0.338061	0.0588369	0.46043	0.982616	47.86	42.58	79.44	32.91	161.1	84.6	50.2	26.7	31.5	High	High	High	High	High	1
FALSE	High	Master Protein	P25205	DNA replication licensing factor MCM3 OS=Homo sapiens OX=9606 GN=MCM3 PE=1 SV=3	0	200.116	49	41	128	40	808	90.9	5.77	62508		41		0	1	7.874	8.055	5.211	37.175	0.235157	6.41257e-05	0.000258337	0.282148	40.59	62.77	61.37	62.09	101.6	104.5	54.9	13.4	449.2	High	High	High	Peak Found	High	1
FALSE	High	Master Protein	Q86YZ3	Hornerin OS=Homo sapiens OX=9606 GN=HRNR PE=1 SV=2	0	197.389	33	30	140	30	2850	282.2	10.04	55330		30		0	0	0.589	0.534	0.566	0.251	0.985423	0.369642	0.168	0.875994	32.02	25.77	59.78	30.27	49.6	52.4	45.6	94.4	17.5	High	High	High	High	High	1
FALSE	High	Master Protein	P04259	Keratin, type II cytoskeletal 6B OS=Homo sapiens OX=9606 GN=KRT6B PE=1 SV=5	0	195.591	51	45	222	4	564	60	8	106344		45		0	0	0.103	0.288	0.165	0.052	0.210947	0.0195568	1.51769e-06	0.54807	200.08	52.73	262.18	146.84	14.6	117.4	22.8	564.9	7.8	High	High	High	High	High	1
FALSE	High	Master Protein	P33992	DNA replication licensing factor MCM5 OS=Homo sapiens OX=9606 GN=MCM5 PE=1 SV=5	0	194.086	51	39	138	38	734	82.2	8.37	66238		39		0	0	5.807	4.381	3.111	16.048	0.362026	0.00876643	0.0265467	0.484337	46.98	33.41	68.48	38.86	102.2	120.3	87.1	67.8	284.3	High	High	High	High	High	1
FALSE	High	Master Protein	P14618	Pyruvate kinase PKM OS=Homo sapiens OX=9606 GN=PKM PE=1 SV=4	0	188.309	63	34	260	34	531	57.9	7.84	120881		34		0	0	0.52	0.996	1.012	0.245	0.973488	0.986398	0.949586	0.870183	28.79	33.03	67.34	26.87	77.4	130.3	143.6	150.3	32.3	High	High	High	High	High	1
FALSE	High	Master Protein	P20930	Filaggrin OS=Homo sapiens OX=9606 GN=FLG PE=1 SV=3	0	184.802	25	44	59	44	4061	434.9	9.25	23449		44		0	0	0.071	0.054	0.188	0.073	0.102562	9.57841e-10	8.83161e-06	0.630146	110.37	89.53	59.13	99.37	6.7	5.2	21	739.7	4.8	Peak Found	Peak Found	Peak Found	High	High	1
FALSE	High	Master Protein	Q9BXJ9	N-alpha-acetyltransferase 15, NatA auxiliary subunit OS=Homo sapiens OX=9606 GN=NAA15 PE=1 SV=1	0	182.733	37	42	168	42	866	101.2	7.42	86555		42		0	0	9.535	4.599	3.714	14.32	0.171825	0.00629204	0.00684451	0.513092	23.22	30.16	27.75	30.93	135.1	62.3	48.5	12.4	249.6	High	High	High	Peak Found	High	1
FALSE	High	Master Protein	Q99460	26S proteasome non-ATPase regulatory subunit 1 OS=Homo sapiens OX=9606 GN=PSMD1 PE=1 SV=2	0	181.503	43	37	225	37	953	105.8	5.39	98276		37		0	0	2.674	2.257	1.753	0.651	0.806533	0.284816	0.530225	0.984872	19.09	21.45	39.13	25.01	130.2	106.8	75.4	49.1	75.7	High	High	High	High	High	1
FALSE	High	Master Protein	O95757	Heat shock 70 kDa protein 4L OS=Homo sapiens OX=9606 GN=HSPA4L PE=1 SV=3	0	181.459	46	36	134	28	839	94.5	5.88	59599		36		0	2	12.179	8.641	6.506	29.904	0.106359	3.23079e-05	1.95224e-05	0.333201	19.76	26.95	33.31	23.81	122.8	89.5	57.9	12.8	327.2	High	High	High	Peak Found	High	1
FALSE	High	Master Protein	P13010	X-ray repair cross-complementing protein 5 OS=Homo sapiens OX=9606 GN=XRCC5 PE=1 SV=3	0	180.428	43	37	120	37	732	82.7	5.81	54153		37		0	0	1.8	1.399	1.669	25.759	0.962576	0.872123	0.611966	0.369586	37.37	22.62	21.83	62.54	42.3	39.5	34.6	20.5	661.6	High	High	High	High	High	1
FALSE	High	Master Protein	Q96QK1	Vacuolar protein sorting-associated protein 35 OS=Homo sapiens OX=9606 GN=VPS35 PE=1 SV=2	0	178.973	36	30	261	30	796	91.6	5.49	131905		30		0	0	1.01	1.232	1.355	0.589	0.999286	0.966347	0.916667	0.982616	40.11	16.83	34.48	22.35	105.3	124.4	122.7	97	56.7	High	High	High	High	High	1
FALSE	High	Master Protein	P11586	C-1-tetrahydrofolate synthase, cytoplasmic OS=Homo sapiens OX=9606 GN=MTHFD1 PE=1 SV=3	0	178.411	43	38	250	36	935	101.5	7.3	120915		38		0	3	0.926	1.363	1.161	0.825	0.999286	0.893506	0.997209	0.999163	18.46	20	30.8	23.33	93.4	129.9	124.7	106.5	67.8	High	High	High	High	High	1
FALSE	High	Master Protein	P02533	Keratin, type I cytoskeletal 14 OS=Homo sapiens OX=9606 GN=KRT14 PE=1 SV=4	0	178.103	60	36	185	11	472	51.5	5.16	84604		36		0	21	0.225	0.371	0.249	0.072	0.577648	0.0828351	0.000250733	0.627365	89.82	40.28	85.22	68.22	49.7	77.5	67.2	272.6	36.2	High	High	High	High	High	1
FALSE	High	Master Protein	P45974	Ubiquitin carboxyl-terminal hydrolase 5 OS=Homo sapiens OX=9606 GN=USP5 PE=1 SV=2	0	172.393	41	32	170	31	858	95.7	5.03	78741		32		0	1	11.423	6.537	6.457	22.634	0.120724	0.000421472	2.13446e-05	0.399251	43.71	22.47	18.82	46.37	139.3	73.2	62.1	9.1	255.6	High	High	High	High	High	1
FALSE	High	Master Protein	P33993	DNA replication licensing factor MCM7 OS=Homo sapiens OX=9606 GN=MCM7 PE=1 SV=4	0	171.181	46	32	136	31	719	81.3	6.46	63353		32		0	1	11.894	9.43	4.311	18.687	0.111902	1.32639e-05	0.00177997	0.444199	60.91	73.11	78.17	62.92	161.7	124.3	76.9	10.3	247	High	High	High	Peak Found	High	1
FALSE	High	Master Protein	P49588	Alanine--tRNA ligase, cytoplasmic OS=Homo sapiens OX=9606 GN=AARS1 PE=1 SV=2	0	169.847	41	37	243	37	968	106.7	5.53	111125		37		0	0	0.462	0.909	0.93	0.184	0.935927	0.966518	0.88221	0.812822	32.79	25.25	38.42	28.68	75.7	151.2	138.6	161.1	31	High	High	High	High	High	1
FALSE	High	Master Protein	P15924	Desmoplakin OS=Homo sapiens OX=9606 GN=DSP PE=1 SV=3	0	169.455	17	48	125	48	2871	331.6	6.81	49818		48		0	0	0.217	0.414	0.304	0.085	0.559272	0.139303	0.00193223	0.666	51.84	29.26	48.83	21.81	33.2	75.4	37.9	206.6	10.1	High	High	High	High	High	1
FALSE	High	Master Protein	Q15029	116 kDa U5 small nuclear ribonucleoprotein component OS=Homo sapiens OX=9606 GN=EFTUD2 PE=1 SV=1	0	168.9	49	38	214	37	972	109.4	5	99537		38		0	0	0.646	0.812	0.979	0.061	0.999286	0.889802	0.92938	0.586223	23.22	16.81	32.55	22.9	95.5	107.7	129.8	138.9	13.2	High	High	High	High	High	1
FALSE	High	Master Protein	P34932	Heat shock 70 kDa protein 4 OS=Homo sapiens OX=9606 GN=HSPA4 PE=1 SV=4	0	168.685	57	44	96	36	840	94.3	5.19	39563		44		0	8	2.447	1.372	1.542	7.15	0.849806	0.889791	0.743941	0.684212	38.25	42	36.66	32.59	109.5	58.2	55.7	36.6	385	High	High	High	High	High	1
FALSE	High	Master Protein	Q92499	ATP-dependent RNA helicase DDX1 OS=Homo sapiens OX=9606 GN=DDX1 PE=1 SV=2	0	168.584	46	33	192	33	740	82.4	7.23	97376		33		0	0	5.638	3.419	2.552	5.536	0.378539	0.0406844	0.0933364	0.735546	21.15	26.54	27.69	24.7	140.6	88.1	62.8	23.7	140.4	High	High	High	High	High	1
FALSE	High	Master Protein	P52789	Hexokinase-2 OS=Homo sapiens OX=9606 GN=HK2 PE=1 SV=2	0	167.959	40	34	174	27	917	102.3	6.05	87221		34		0	0	1.972	1.175	1.613	2.342	0.922629	0.986398	0.665665	0.899228	22.21	15.24	30.81	20.55	117.3	88	75.5	102.6	115.1	High	High	High	High	High	1
FALSE	High	Master Protein	P02786	Transferrin receptor protein 1 OS=Homo sapiens OX=9606 GN=TFRC PE=1 SV=2	0	165.241	45	33	245	33	760	84.8	6.61	116313		33		0	0	0.947	1.09	1.054	0.545	0.999286	0.98875	0.972863	0.982616	21.47	21.24	32.73	31.36	104.4	109.2	108.4	108	59.9	High	High	High	High	High	1
FALSE	High	Master Protein	P23921	Ribonucleoside-diphosphate reductase large subunit OS=Homo sapiens OX=9606 GN=RRM1 PE=1 SV=1	0	164.627	45	32	221	32	792	90	7.15	99906		32		0	0	5.522	3.792	3.695	4.234	0.391788	0.0217547	0.0071116	0.784639	28.7	28.18	59.92	25.02	153.8	111.6	109.1	28.2	127.8	High	High	High	High	High	1
FALSE	High	Master Protein	P19338	Nucleolin OS=Homo sapiens OX=9606 GN=NCL PE=1 SV=3	0	163.396	38	39	98	39	710	76.6	4.7	46021		39		0	0	3.17	2.704	2.818	47.951	0.705386	0.134891	0.0502611	0.231839	46.25	47.82	32.08	36.9	48.7	36.7	34.5	13.2	696.2	High	High	High	High	High	1
FALSE	High	Master Protein	P08779	Keratin, type I cytoskeletal 16 OS=Homo sapiens OX=9606 GN=KRT16 PE=1 SV=4	0	162.487	59	32	168	14	473	51.2	5.05	77463		32		0	0	0.104	0.48	0.11	0.046	0.211757	0.262909	3.25658e-09	0.521651	104.11	100.56	76.86	71.68	23.2	108.6	31.1	509.6	43.3	High	High	High	High	High	1
FALSE	High	Master Protein	P35221	Catenin alpha-1 OS=Homo sapiens OX=9606 GN=CTNNA1 PE=1 SV=1	0	162.199	45	37	148	37	906	100	6.29	56651		37		0	0	4.658	4.344	3.747	11.041	0.477035	0.00911819	0.00632508	0.576803	36.06	61.28	59.05	40.88	114.2	112.6	83.5	25.7	276.9	High	High	High	High	High	1
FALSE	High	Master Protein	P08237	ATP-dependent 6-phosphofructokinase, muscle type OS=Homo sapiens OX=9606 GN=PFKM PE=1 SV=2	0	161.211	40	30	230	23	780	85.1	7.99	103345		30		0	2	1.957	1.983	1.524	2.062	0.925224	0.434507	0.759036	0.922222	29.9	23.22	68.39	30.77	120	118.3	100.7	59.9	131.7	High	High	High	High	High	1
FALSE	High	Master Protein	P05556	Integrin beta-1 OS=Homo sapiens OX=9606 GN=ITGB1 PE=1 SV=2	0	160.538	38	30	268	29	798	88.4	5.39	134296		30		0	1	0.666	1.086	1.027	0.434	0.999286	0.991659	0.956009	0.971083	30.33	28.38	48.41	40.61	86.4	130.5	123.5	130.3	59.6	High	High	High	High	High	1
FALSE	High	Master Protein	P16615	Sarcoplasmic/endoplasmic reticulum calcium ATPase 2 OS=Homo sapiens OX=9606 GN=ATP2A2 PE=1 SV=1	0	160.228	33	34	218	34	1042	114.7	5.34	101386		34		0	0	0.709	0.955	0.992	0.564	0.999286	0.986398	0.932939	0.982616	25.83	17.43	39.8	28.45	88.1	113.8	110.2	123.2	77.3	High	High	High	High	High	1
FALSE	High	Master Protein	Q9Y678	Coatomer subunit gamma-1 OS=Homo sapiens OX=9606 GN=COPG1 PE=1 SV=1	0	160.187	41	30	149	27	874	97.7	5.47	64290		30		0	3	8.607	3.595	2.182	15.393	0.205423	0.030287	0.214264	0.494597	80.87	71.69	73.19	70.49	128	85.6	93.3	46	154.2	High	High	High	High	High	1
FALSE	High	Master Protein	Q13619	Cullin-4A OS=Homo sapiens OX=9606 GN=CUL4A PE=1 SV=3	0	158.564	42	34	170	21	759	87.6	8.13	82542		34		0	0	7.37	6.572	6.505	4.861	0.261801	0.000406227	1.95224e-05	0.753347	21.2	27.96	42.46	27.11	147.3	138.3	135.4	20.3	115.8	High	High	High	High	High	1
FALSE	High	Master Protein	P11021	Endoplasmic reticulum chaperone BiP OS=Homo sapiens OX=9606 GN=HSPA5 PE=1 SV=2	0	154.591	48	30	234	28	654	72.3	5.16	100289		30		0	2	0.386	0.698	0.987	0.166	0.872556	0.737162	0.932017	0.801017	20.66	27.44	28.39	27.87	63.5	111	150.4	160.4	27	High	High	High	High	High	1
FALSE	High	Master Protein	P11216	Glycogen phosphorylase, brain form OS=Homo sapiens OX=9606 GN=PYGB PE=1 SV=5	0	154.555	39	34	201	26	843	96.6	6.86	95457		34		0	0	1.091	1.178	1.151	0.787	0.999286	0.986398	0.99817	0.999163	22.09	28.17	31.96	23.87	103.7	95.2	91.9	92.8	73	High	High	High	High	High	1
FALSE	High	Master Protein	A0A669KAX4	Cullin-4B OS=Homo sapiens OX=9606 GN=CUL4B PE=1 SV=1	0	154.206	38	37	155	24	897	102.5	8.06	73577		37		0	16	9.57	6.776	7.407	6.974	0.171252	0.000316095	3.60842e-06	0.690102	31.33	29.78	46.51	38.07	173.1	122.9	134.6	14.7	127.1	High	High	High	Peak Found	High	1
FALSE	High	Master Protein	P53992	Protein transport protein Sec24C OS=Homo sapiens OX=9606 GN=SEC24C PE=1 SV=3	0	150.818	35	31	231	27	1094	118.2	7.06	102651		31		0	4	0.778	0.925	0.716	0.114	0.999286	0.976985	0.472933	0.734433	22.12	23.7	59.25	24.67	96.9	109.8	106.5	136.6	20.3	High	High	High	High	High	1
FALSE	High	Master Protein	P53618	Coatomer subunit beta OS=Homo sapiens OX=9606 GN=COPB1 PE=1 SV=3	0	150.46	33	28	38	28	953	107.1	6.05	19881		28		0	0	2.764	1.866	2.36	30.4	0.791881	0.507356	0.146036	0.329064	60.71	7.89	32.46	38.76	42.3	36.7	30.6	9.6	731	Peak Found	High	High	Peak Found	High	1
FALSE	High	Master Protein	Q9UBT2	SUMO-activating enzyme subunit 2 OS=Homo sapiens OX=9606 GN=UBA2 PE=1 SV=2	0	148.251	49	29	88	29	640	71.2	5.29	45869		29		0	0	11.655	5.697	3.747	42.647	0.116453	0.00129864	0.00632846	0.25477	38.51	34.43	77.38	45.44	110.6	57.7	34.8	10.8	462.3	High	High	High	Peak Found	High	1
FALSE	High	Master Protein	P11498	Pyruvate carboxylase, mitochondrial OS=Homo sapiens OX=9606 GN=PC PE=1 SV=2	0	148.132	31	31	192	31	1178	129.6	6.84	96789		31		0	0	1.4	0.958	0.945	0.181	0.993992	0.986398	0.898226	0.811404	15.3	18.74	26.15	19.15	124.5	82.2	68.5	90	15.8	High	High	High	High	High	1
FALSE	High	Master Protein	Q08J23	RNA cytosine C(5)-methyltransferase NSUN2 OS=Homo sapiens OX=9606 GN=NSUN2 PE=1 SV=2	0	147.257	56	33	53	33	767	86.4	6.77	24705		33		0	0	4.912	4.097	2.591	45.33	0.447385	0.0133638	0.0854697	0.242421	18.54	36.44	64.14	15.56	56.5	52.9	32.7	5.8	700	High	High	High	Peak Found	High	1
FALSE	High	Master Protein	Q13263	Transcription intermediary factor 1-beta OS=Homo sapiens OX=9606 GN=TRIM28 PE=1 SV=5	0	147.102	48	27	42	27	835	88.5	5.77	19926		27		0	0	2.202	1.656	1.606	100	0.879944	0.67786	0.752129	3.00121e-17	26.73	28	4.45	21.82	11.7	10.4	14.8	4.9	833.6	Peak Found	Peak Found	Peak Found	Peak Found	High	1
FALSE	High	Master Protein	Q02218	2-oxoglutarate dehydrogenase, mitochondrial OS=Homo sapiens OX=9606 GN=OGDH PE=1 SV=3	0	147.011	38	36	198	36	1023	115.9	6.86	82614		36		0	0	1.194	0.565	1.03	0.187	0.999286	0.439141	0.959117	0.818617	23.1	22.57	39.47	28.78	136.7	57.2	106.4	105.8	31.1	High	High	High	High	High	1
FALSE	High	Master Protein	J3KR24	Isoleucyl-tRNA synthetase OS=Homo sapiens OX=9606 GN=IARS1 PE=1 SV=1	0	146.536	32	36	192	36	1152	131.7	6.11	84783		36		0	0	0.42	0.919	0.918	0.101	0.905728	0.97356	0.867063	0.715404	17.29	18.92	28.83	31.93	77.1	155	147.9	175.8	14.5	High	High	High	High	High	1
FALSE	High	Master Protein	Q92598	Heat shock protein 105 kDa OS=Homo sapiens OX=9606 GN=HSPH1 PE=1 SV=1	0	146.218	38	30	75	24	858	96.8	5.39	30948		30		0	0	2.386	1.934	1.471	11.66	0.86618	0.459523	0.817143	0.561597	58.78	65.71	71.13	50.8	89.8	68.3	49.4	27.9	518	High	High	High	Peak Found	High	1
FALSE	High	Master Protein	P21399	Cytoplasmic aconitate hydratase OS=Homo sapiens OX=9606 GN=ACO1 PE=1 SV=3	0	144.973	41	36	230	36	889	98.3	6.68	114662		36		0	0	1.088	1.243	1.15	1.079	0.999286	0.954664	0.99817	0.982616	23.06	22.38	28.59	26.79	102.4	113.8	112.3	103.9	81.4	High	High	High	High	High	1
FALSE	High	Master Protein	P14923	Junction plakoglobin OS=Homo sapiens OX=9606 GN=JUP PE=1 SV=3	0	142.811	44	29	125	25	745	81.7	6.14	50804		29		0	4	0.545	0.83	0.692	1.255	0.977307	0.906045	0.41366	0.982616	63.8	45.2	49.7	67.73	59.6	96.9	85.4	126.6	142.7	High	High	High	High	High	1
FALSE	High	Master Protein	Q9NR30	Nucleolar RNA helicase 2 OS=Homo sapiens OX=9606 GN=DDX21 PE=1 SV=5	0	141.68	40	31	94	31	783	87.3	9.28	43024		31		0	0	7.651	2.828	2.754	13.148	0.245344	0.109193	0.0582577	0.536308	77.25	90.01	89.26	83.58	124.2	55.3	46.7	31.1	236.6	High	High	High	Peak Found	High	1
FALSE	High	Master Protein	Q15149	Plectin OS=Homo sapiens OX=9606 GN=PLEC PE=1 SV=3	0	140.972	10	42	207	40	4684	531.5	5.96	81078		42		0	2	0.501	0.708	1.052	0.068	0.962576	0.753105	0.972863	0.614155	27.33	25.2	25.37	28.7	81.7	113.1	175.7	167.3	10.5	High	High	High	High	High	1
FALSE	High	Master Protein	F5GZS6	4F2 cell-surface antigen heavy chain OS=Homo sapiens OX=9606 GN=SLC3A2 PE=1 SV=1	0	140.962	47	25	159	25	599	64.8	5.1	76466		25		0	0	0.859	0.775	1.126	2.496	0.999286	0.858154	0.998113	0.881535	20.15	46.37	32.04	33.35	82.5	68.7	94.2	90.6	244.5	High	High	High	High	High	1
FALSE	High	Master Protein	P07384	Calpain-1 catalytic subunit OS=Homo sapiens OX=9606 GN=CAPN1 PE=1 SV=1	0	139.521	35	27	187	27	714	81.8	5.67	96905		27		0	0	3.727	3.529	3.293	2.626	0.607796	0.0338643	0.0175803	0.870386	34.42	19.03	57.9	22.35	143.2	126.3	115.8	35.5	101.4	High	High	High	High	High	1
FALSE	High	Master Protein	Q92973	Transportin-1 OS=Homo sapiens OX=9606 GN=TNPO1 PE=1 SV=2	0	139.385	33	26	108	19	898	102.3	4.98	53277		26		0	9	3.992	3.696	2.682	7.024	0.564241	0.0254568	0.0687923	0.689259	41.48	42.29	44.02	36.2	132.9	110.1	82.3	31.7	257.6	High	High	High	High	High	1
FALSE	High	Master Protein	P50570-2	Isoform 2 of Dynamin-2 OS=Homo sapiens OX=9606 GN=DNM2	0	138	36	34	126	1	866	97.6	7.64	53851		34		0	34	9.045	4.13	2.595	11.911	0.189182	0.0127157	0.084636	0.559894	23.85	29.19	58.78	30.35	156.3	69.2	50.1	18.4	198.5	High	Peak Found	Peak Found	Peak Found	High	1
FALSE	High	Master Protein	P55884	Eukaryotic translation initiation factor 3 subunit B OS=Homo sapiens OX=9606 GN=EIF3B PE=1 SV=3	0	137.989	39	30	146	30	814	92.4	5	66825		30		0	0	7.86	4.13	4.346	3.539	0.235157	0.0127157	0.00164454	0.811404	47.69	30.95	76.92	41.58	209.9	106.9	97.5	25.9	108.5	High	High	High	High	High	1
FALSE	High	Master Protein	P50570	Dynamin-2 OS=Homo sapiens OX=9606 GN=DNM2 PE=1 SV=2	0	137.976	36	34	126	1	870	98	7.44	52868		34		0	0	100	100	100	100	5.33141e-17	6.62708e-17	5.41217e-17	3.00121e-17					131.6	64.1	53		217.1	Peak Found	Peak Found	Peak Found	Not Found	High	1
FALSE	High	Master Protein	O43143	Pre-mRNA-splicing factor ATP-dependent RNA helicase DHX15 OS=Homo sapiens OX=9606 GN=DHX15 PE=1 SV=2	0	137.549	38	32	57	32	795	90.9	7.46	27763		32		0	0	1.257	2.291	1.94	10.533	0.999286	0.272323	0.368308	0.58829	18.51	37.23	23.72	32.3	67.2	104.3	77.2	40.1	433.7	High	High	High	High	High	1
FALSE	High	Master Protein	Q58FF6	Putative heat shock protein HSP 90-beta 4 OS=Homo sapiens OX=9606 GN=HSP90AB4P PE=5 SV=1	0	136.493	20	15	157	1	505	58.2	4.73	78219		15		0	0	0.816	0.01	0.01	12.768	0.999286	6.62708e-17	5.41217e-17	0.542071	0			0	39.2			33.5	511.5	Peak Found	Not Found	Not Found	Peak Found	High	1
FALSE	High	Master Protein	P60709	Actin, cytoplasmic 1 OS=Homo sapiens OX=9606 GN=ACTB PE=1 SV=1	0	136.32	54	23	153	7	375	41.7	5.48	74824		23		0	20	0.549	0.676	0.475	0.652	0.977307	0.68713	0.060195	0.984872	84.96	91.98	110.57	85.84	93.3	76.9	75.8	223.4	96.2	High	High	High	High	High	1
FALSE	High	Master Protein	P56192	Methionine--tRNA ligase, cytoplasmic OS=Homo sapiens OX=9606 GN=MARS1 PE=1 SV=2	0	135.205	38	31	145	31	900	101.1	6.16	49963		31		0	0	2.591	1.16	1.536	3.174	0.827214	0.986398	0.753366	0.83676	32.71	36.67	60.73	46.01	145.1	49.5	73.5	50.9	217.5	High	High	High	High	High	1
FALSE	High	Master Protein	Q10567	AP-1 complex subunit beta-1 OS=Homo sapiens OX=9606 GN=AP1B1 PE=1 SV=2	0	134.942	33	34	42	14	949	104.6	5.06	22415		34		0	19	0.781	1.347	1.745	28.132	0.999286	0.901011	0.538142	0.348254	76.94	11.37	6.92	17.79	42.6	29.8	32.4	20.8	627.1	High	Peak Found	Peak Found	Peak Found	High	1
FALSE	High	Master Protein	Q04695	Keratin, type I cytoskeletal 17 OS=Homo sapiens OX=9606 GN=KRT17 PE=1 SV=2	0	134.255	51	30	112	14	432	48.1	5.02	53554		30		0	1	0.097	0.12	0.109	0.049	0.189182	1.56215e-05	2.72307e-09	0.536308	87.38	105.49	126.71	114.1	11	27.8	29.4	730.2	9.6	Peak Found	High	Peak Found	High	High	1
FALSE	High	Master Protein	P63010	AP-2 complex subunit beta OS=Homo sapiens OX=9606 GN=AP2B1 PE=1 SV=1	0	133.643	33	32	41	12	937	104.5	5.38	22054		32		0	0	1.029	1.429	1.452	41.535	0.999286	0.858154	0.844447	0.260311	15.33	22.75	20.55	147.79	26	27.6	22.2	16.3	749	Peak Found	Peak Found	Peak Found	Peak Found	High	1
FALSE	High	Master Protein	Q8N1F7	Nuclear pore complex protein Nup93 OS=Homo sapiens OX=9606 GN=NUP93 PE=1 SV=2	0	132.966	35	29	37	29	819	93.4	5.72	20773		29		0	0	1.642	1.979	1.367	11.396	0.977307	0.434618	0.898559	0.569089	52.4	20.63	69.4	44.74	64.4	57.2	97.3	14.5	524.9	Peak Found	Peak Found	Peak Found	Peak Found	High	1
FALSE	High	Master Protein	P00533	Epidermal growth factor receptor OS=Homo sapiens OX=9606 GN=EGFR PE=1 SV=2	0	131.263	26	27	183	27	1210	134.2	6.68	73890		27		0	0	0.421	0.81	0.893	0.065	0.90632	0.889274	0.827984	0.602667	39	41.53	52.3	35.15	74.3	126.7	150.8	176.5	11.3	High	High	High	High	High	1
FALSE	High	Master Protein	O94855	Protein transport protein Sec24D OS=Homo sapiens OX=9606 GN=SEC24D PE=1 SV=2	0	131.007	31	30	171	27	1032	112.9	7.25	70955		30		0	0	0.715	0.953	0.623	0.127	0.999286	0.986398	0.266504	0.745538	29.49	30.33	62.24	37.73	104.6	114.4	107.6	142.3	17.1	High	High	High	High	High	1
FALSE	High	Master Protein	P11142	Heat shock cognate 71 kDa protein OS=Homo sapiens OX=9606 GN=HSPA8 PE=1 SV=1	0	130.389	43	29	185	23	646	70.9	5.52	81659		29		0	4	0.389	0.723	1.017	0.175	0.876194	0.791857	0.954599	0.808871	28.74	27.76	53.31	33.68	101.9	95.4	91.8	91.8	117.6	High	High	High	High	High	1
FALSE	High	Master Protein	O75534	Cold shock domain-containing protein E1 OS=Homo sapiens OX=9606 GN=CSDE1 PE=1 SV=2	0	130.36	35	28	34	28	798	88.8	6.25	20271		28		0	0	0.83	1.797	1.913	33.332	0.999286	0.561623	0.539592	0.307992	0.5	20.24	9.02	6.35	22.4	19.2	16.9	3.5	796.9	Peak Found	Peak Found	Peak Found	Peak Found	High	1
FALSE	High	Master Protein	Q7KZF4	Staphylococcal nuclease domain-containing protein 1 OS=Homo sapiens OX=9606 GN=SND1 PE=1 SV=1	0	127.813	34	31	129	31	910	101.9	7.17	55328		31		0	0	3.521	1.681	2.308	1.759	0.643939	0.653446	0.162642	0.948521	32.86	34.96	31.73	27.65	156	59.6	68.1	40.9	88.5	High	High	High	High	High	1
FALSE	High	Master Protein	A0A0D9SF54	Spectrin alpha chain, non-erythrocytic 1 OS=Homo sapiens OX=9606 GN=SPTAN1 PE=1 SV=1	0	126.665	19	44	135	44	2457	282.7	5.34	43982		44		0	0	0.241	0.877	0.976	0.048	0.623529	0.948794	0.92938	0.534996	32.1	19.99	27.63	89.12	44	190.1	161.6	205.6	10	High	High	High	High	Peak Found	1
FALSE	High	Master Protein	Q12906	Interleukin enhancer-binding factor 3 OS=Homo sapiens OX=9606 GN=ILF3 PE=1 SV=3	0	126.13	36	27	45	27	894	95.3	8.76	21313		27		0	0	4.586	2.196	2.92	46.353	0.486414	0.307275	0.0408035	0.238071	24.41	18.87	116.58	33.51	56.2	24	22.5	5.3	712.2	High	Peak Found	Peak Found	Peak Found	High	1
FALSE	High	Master Protein	Q00839	Heterogeneous nuclear ribonucleoprotein U OS=Homo sapiens OX=9606 GN=HNRNPU PE=1 SV=6	0	125.207	32	27	42	1	825	90.5	6	20417		27		0	0				100				3.00121e-17									900	Not Found	Not Found	Not Found	Not Found	High	1
FALSE	High	Master Protein	P54886	Delta-1-pyrroline-5-carboxylate synthase OS=Homo sapiens OX=9606 GN=ALDH18A1 PE=1 SV=2	0	124.071	29	22	53	22	795	87.2	7.12	25254		22		0	0	5.152	5.618	3.277	24.853	0.420817	0.00144324	0.018289	0.378444	28.28	45.23	57.43	44.07	94.9	105.1	50.2	18.2	476.5	High	High	High	Peak Found	High	1
FALSE	High	Master Protein	P26640	Valine--tRNA ligase OS=Homo sapiens OX=9606 GN=VARS1 PE=1 SV=4	0	123.355	29	31	136	31	1264	140.4	7.59	53930		31		0	0	0.454	1.094	1.068	0.147	0.928961	0.98875	0.980772	0.773993	37.63	16.76	27.52	44.7	61.4	177.6	150.4	165.5	16.5	High	High	High	High	High	1
FALSE	High	Master Protein	A0A1W2PPS1	Heterogeneous nuclear ribonucleoprotein U OS=Homo sapiens OX=9606 GN=HNRNPU PE=1 SV=1	0	120.762	31	27	42	1	804	88.3	5.78	19909		27		0	28	2.323	1.976	1.44	20.798	0.872556	0.434672	0.843641	0.41731	60.7	90.46	39.58	100.21	53.2	66.2	39.4	15.4	624.4	Not Found	Not Found	Not Found	Not Found	High	1
FALSE	High	Master Protein	H7BXY3	RNA helicase OS=Homo sapiens OX=9606 GN=DHX30 PE=1 SV=1	0	120.346	28	29	154	29	1166	130.5	8.56	64175		29		0	0	0.78	0.826	0.993	0.058	0.999286	0.901011	0.932939	0.574488	29.49	27.61	22.85	31.65	106.9	110.5	113.9	133.8	5.4	High	High	High	High	High	1
FALSE	High	Master Protein	P49589-3	Isoform 3 of Cysteine--tRNA ligase, cytoplasmic OS=Homo sapiens OX=9606 GN=CARS1	0	116.006	39	28	92	28	831	94.6	6.83	39302		28		0	0	6.07	4.245	3.12	8.776	0.339142	0.0106072	0.0259977	0.630146	50.71	84.22	26.23	38.84	123.5	100.3	59.5	13.2	238.7	High	High	High	High	High	1
FALSE	High	Master Protein	Q13617	Cullin-2 OS=Homo sapiens OX=9606 GN=CUL2 PE=1 SV=2	0	115.145	29	24	146	24	745	86.9	6.92	65439		24		0	0	2.176	2.315	1.844	1.145	0.891446	0.261899	0.447754	0.982616	42.67	15.2	56.19	14.48	134.4	146	113.2	58.7	74.8	High	High	High	High	High	1
FALSE	High	Master Protein	O95782	AP-2 complex subunit alpha-1 OS=Homo sapiens OX=9606 GN=AP2A1 PE=1 SV=3	0	113.831	27	25	33	18	977	107.5	7.03	18470		25		0	7	1.625	2.334	2.225	15.035	0.977307	0.254667	0.194326	0.501905	36.64	33.61	20.35	34.8	49.7	46.7	209.1	19.6	336.1	Peak Found	High	Peak Found	Peak Found	High	1
FALSE	High	Master Protein	F5H365	Protein transport protein SEC23 OS=Homo sapiens OX=9606 GN=SEC23A PE=1 SV=1	0	113.459	39	23	102	21	736	82.9	7.46	44240		23		0	2	7.788	6.286	4.06	12.249	0.237294	0.000583644	0.00307025	0.551722	29.15	25.96	19.7	14.35	144.9	108.5	57.3	13.1	215	High	High	High	High	High	1
FALSE	High	Master Protein	O95347	Structural maintenance of chromosomes protein 2 OS=Homo sapiens OX=9606 GN=SMC2 PE=1 SV=2	0	112.444	26	30	120	30	1197	135.6	8.43	48639		30		0	0	0.243	0.831	0.925	0.044	0.625302	0.907651	0.879281	0.503801	19.92	28.82	14.47	38.01	92.9	112.3	130	141.9	7.6	High	High	High	High	Peak Found	1
FALSE	High	Master Protein	Q02809	Procollagen-lysine,2-oxoglutarate 5-dioxygenase 1 OS=Homo sapiens OX=9606 GN=PLOD1 PE=1 SV=2	0	112.35	39	24	170	1	727	83.5	6.95	77476		24		0	0	1.241	0.796	1.925	0.38	0.999286	0.873487	0.571741	0.982359	0	0	0	0	117	75	181.5	94.3	35.8	Peak Found	Peak Found	Peak Found	Peak Found	Peak Found	1
FALSE	High	Master Protein	Q92945	Far upstream element-binding protein 2 OS=Homo sapiens OX=9606 GN=KHSRP PE=1 SV=4	0	111.717	42	22	35	22	711	73.1	7.3	16483		22		0	0	4.431	4.014	4.678	37.24	0.503054	0.0152245	0.0008063	0.281926	40.36	107.26	5.32	39.96	62.6	84.3	49.6	13.8	661	High	High	High	Peak Found	High	1
FALSE	High	Master Protein	Q96TA1	Protein Niban 2 OS=Homo sapiens OX=9606 GN=NIBAN2 PE=1 SV=3	0	110.982	28	22	61	22	746	84.1	6.19	29384		22		0	0	1.015	2.025	1.483	23.3	0.999286	0.404639	0.803124	0.392276	25.42	36.53	83.71	35.29	27.4	52.4	44.7	22	671.2	High	High	High	High	High	1
FALSE	High	Master Protein	Q86VP6	Cullin-associated NEDD8-dissociated protein 1 OS=Homo sapiens OX=9606 GN=CAND1 PE=1 SV=2	0	110.725	26	29	151	29	1230	136.3	5.78	67356		29		0	0	0.474	1.213	1.114	0.287	0.953492	0.97237	0.995557	0.905305	31.29	29.73	37.29	29.99	68.9	165.4	167.2	153.7	45.1	High	High	High	High	High	1
FALSE	High	Master Protein	Q02809-2	Isoform 2 of Procollagen-lysine,2-oxoglutarate 5-dioxygenase 1 OS=Homo sapiens OX=9606 GN=PLOD1	0	110.516	36	24	169	1	774	88.2	7.11	77408		24		0	25	1.672	1.658	1.882	0.8	0.975346	0.67786	0.410701	0.999525	21.22	36.21	55.83	27.58	122.6	112.7	141.7	69.4	61.7	Not Found	Peak Found	Peak Found	Peak Found	Peak Found	1
FALSE	High	Master Protein	Q96P70	Importin-9 OS=Homo sapiens OX=9606 GN=IPO9 PE=1 SV=3	0	108.847	22	23	142	23	1041	115.9	4.81	64486		23		0	0	0.831	0.856	1.335	0.129	0.999286	0.936193	0.929222	0.748977	13.65	22.65	29.14	30.34	111.2	113.2	177.2	135.3	18	High	High	High	High	High	1
FALSE	High	Master Protein	A0A0C4DGB5	Calpain inhibitor OS=Homo sapiens OX=9606 GN=CAST PE=1 SV=1	0	107.96	45	27	34	27	754	81	5.1	15353		27		0	0				14.855				0.503168				129.21	13	2	74.4	7.3	726.9	Peak Found	Peak Found	Peak Found	Peak Found	High	1
FALSE	High	Master Protein	P53621	Coatomer subunit alpha OS=Homo sapiens OX=9606 GN=COPA PE=1 SV=2	0	107.758	22	25	129	25	1224	138.3	7.66	57215		25		0	0	3.904	2.94	2.315	0.567	0.577648	0.0910411	0.160341	0.982616	29.18	43.6	37.63	27.29	165.7	114	78.6	40.9	23	High	High	High	High	High	1
FALSE	High	Master Protein	B1AKY9	Sodium/potassium-transporting ATPase subunit alpha OS=Homo sapiens OX=9606 GN=ATP1A2 PE=1 SV=1	0	106.259	16	14	196	1	1009	110.8	5.59	89865		14		0	0	1.195	0.01	2.383	0.694	0.988291	6.62708e-17	0.367664	0.971083	0		0	0	115.7		230.8	96.9	67.2	Peak Found	Not Found	Peak Found	Peak Found	Peak Found	1
FALSE	High	Master Protein	O95155	Ubiquitin conjugation factor E4 B OS=Homo sapiens OX=9606 GN=UBE4B PE=1 SV=1	0	104.815	22	25	129	25	1302	146.1	6.55	50533		25		0	0	0.816	0.694	0.861	0.07	0.999286	0.73012	0.778996	0.619317	28.02	39.91	38.8	33.46	115.4	85	108	137.3	6.5	High	High	High	High	Peak Found	1
FALSE	High	Master Protein	P27708	CAD protein OS=Homo sapiens OX=9606 GN=CAD PE=1 SV=3	0	104.349	17	34	116	31	2225	242.8	6.46	40989		34		0	0	0.605	1.043	1.551	0.054	0.988291	0.997378	0.733152	0.558843	37.15	39.34	52.01	82.61	85.3	136.4	163.6	138.5	7.1	High	High	High	High	High	1
FALSE	High	Master Protein	Q13616	Cullin-1 OS=Homo sapiens OX=9606 GN=CUL1 PE=1 SV=2	0	104.329	35	26	149	25	776	89.6	8	65915		26		0	1	1.702	1.204	1.208	1.102	0.972405	0.976377	0.985257	0.982616	32.76	21.98	26.87	18.11	130	86.1	78.4	71	82	High	High	High	High	High	1
FALSE	High	Master Protein	Q00341	Vigilin OS=Homo sapiens OX=9606 GN=HDLBP PE=1 SV=2	0	103.369	22	25	105	25	1268	141.4	6.87	43602		25		0	0	2.223	1.422	1.395	0.202	0.887031	0.862357	0.883613	0.836662	43.31	54.08	45.28	20.28	138.5	85.6	83.4	59	10.1	High	High	High	High	High	1
FALSE	High	Master Protein	O00410	Importin-5 OS=Homo sapiens OX=9606 GN=IPO5 PE=1 SV=4	0	101.427	25	23	133	23	1097	123.6	4.94	56110		23		0	0	0.421	0.875	0.802	0.21	0.906229	0.948619	0.653887	0.84206	16.94	26.82	67.53	26.86	69.5	143.3	140.4	176.6	30	High	High	High	High	High	1
FALSE	High	Master Protein	Q13618	Cullin-3 OS=Homo sapiens OX=9606 GN=CUL3 PE=1 SV=2	0	101.005	36	26	140	26	768	88.9	8.48	54799		26		0	0	2.01	1.334	0.883	1.404	0.916708	0.911412	0.815856	0.974585	24.21	32.43	58.9	27.44	127.2	86.5	65.4	66.4	95.4	High	High	High	High	High	1
FALSE	High	Master Protein	Q8TCS8	Polyribonucleotide nucleotidyltransferase 1, mitochondrial OS=Homo sapiens OX=9606 GN=PNPT1 PE=1 SV=2	0	100.615	33	25	75	25	783	85.9	7.77	32138		25		0	0	9.123	4.792	5.267	10.189	0.186324	0.00469204	0.00023147	0.594131	28.53	39.09	37.78	33.8	194.5	90.8	111.5	13.7	212.8	High	High	High	High	High	1
FALSE	High	Master Protein	O15067	Phosphoribosylformylglycinamidine synthase OS=Homo sapiens OX=9606 GN=PFAS PE=1 SV=4	0	99.533	15	22	114	22	1338	144.6	5.76	54649		22		0	0	0.581	0.97	0.849	0.031	0.985423	0.986398	0.757172	0.418362	28.3	20.06	46.83	36.96	83.6	144.2	133.8	145.9	2.2	High	High	High	High	Peak Found	1
FALSE	High	Master Protein	A0A1W2PNX8	Protein unc-45 homolog A OS=Homo sapiens OX=9606 GN=UNC45A PE=1 SV=1	0	99.134	24	24	30	24	1084	118.3	6.71	15498		24		0	0	3.844	3.543	3.363	22.657	0.586727	0.0330972	0.01523	0.3992	27.8	13.45	50.75	15.04	77.7	62.6	67.3	9.7	540.5	High	High	Peak Found	Peak Found	High	1
FALSE	High	Master Protein	O60841	Eukaryotic translation initiation factor 5B OS=Homo sapiens OX=9606 GN=EIF5B PE=1 SV=4	0	98.17	19	24	113	24	1220	138.7	5.49	52857		24		0	0	2.473	2.094	1.172	0.178	0.841274	0.362385	0.993395	0.808992	45.56	32.97	77.46	33.88	146.2	101.9	57.8	50	21.7	High	High	High	High	High	1
FALSE	High	Master Protein	Q9BQ52	Zinc phosphodiesterase ELAC protein 2 OS=Homo sapiens OX=9606 GN=ELAC2 PE=1 SV=2	0	97.048	33	22	102	22	826	92.2	7.9	45550		22		0	0	2.004	0.985	1.258	1.771	0.917463	0.986398	0.961625	0.946151	42.31	27.92	49.63	21.65	135.3	61.3	61.8	62.6	118.2	High	High	High	High	High	1
FALSE	High	Master Protein	Q08211	ATP-dependent RNA helicase A OS=Homo sapiens OX=9606 GN=DHX9 PE=1 SV=4	0	95.951	22	24	113	24	1270	140.9	6.84	42340		24		0	0	0.928	1.017	0.993	0.134	0.999286	0.98875	0.932939	0.753347	42.9	36.73	46.21	27.33	117.9	99.2	104.3	89.2	34.3	High	High	High	High	High	1
FALSE	High	Master Protein	P42704	Leucine-rich PPR motif-containing protein, mitochondrial OS=Homo sapiens OX=9606 GN=LRPPRC PE=1 SV=3	0	95.938	20	29	79	29	1394	157.8	6.13	31575		29		0	0	6.361	2.648	2.965	1.133	0.316755	0.148311	0.0368766	0.982616	44.1	31.85	45.14	72.11	196.1	79.3	91.1	34.4	38.7	High	High	High	Peak Found	High	1
FALSE	High	Master Protein	Q14764	Major vault protein OS=Homo sapiens OX=9606 GN=MVP PE=1 SV=4	0	95.523	35	27	119	27	893	99.3	5.48	42802		27		0	0	1.572	1.031	1.374	0.614	0.977307	0.996923	0.898226	0.983379	31.43	26.21	36.52	51.64	127.2	90.9	129.3	87.9	53.3	High	High	High	High	High	1
FALSE	High	Master Protein	P53396	ATP-citrate synthase OS=Homo sapiens OX=9606 GN=ACLY PE=1 SV=3	0	95.054	22	24	92	24	1101	120.8	7.33	39360		24		0	0	1.139	1.708	1.741	1.41	0.999286	0.630321	0.539592	0.974026	44.61	48.9	47.14	44.54	99	137.1	130.3	78.2	129.3	High	High	High	High	High	1
FALSE	High	Master Protein	O75533	Splicing factor 3B subunit 1 OS=Homo sapiens OX=9606 GN=SF3B1 PE=1 SV=3	0	94.973	16	21	131	21	1304	145.7	7.09	61333		21		0	0	0.935	1.137	1.051	0.156	0.99939	0.986398	0.972863	0.789244	16.68	18.71	29.62	26.01	106.2	132.5	116.6	114.4	15.3	High	High	High	High	High	1
FALSE	High	Master Protein	Q9NSE4	Isoleucine--tRNA ligase, mitochondrial OS=Homo sapiens OX=9606 GN=IARS2 PE=1 SV=2	0	94.726	29	27	139	27	1012	113.7	7.2	55595		27		0	0	0.676	0.7	1.184	0.11	0.999286	0.743086	0.987625	0.729255	20.49	34.49	26.12	31.03	94.5	97.7	156.9	148.2	18.7	High	High	High	High	High	1
FALSE	High	Master Protein	P04406	Glyceraldehyde-3-phosphate dehydrogenase OS=Homo sapiens OX=9606 GN=GAPDH PE=1 SV=3	0	94.504	50	20	114	20	335	36	8.46	43344		20		0	0	0.344	0.733	0.588	0.162	0.831636	0.811286	0.201657	0.799136	55.14	63.3	84.06	49.26	53.8	114.5	132	194.6	25.6	High	High	High	High	High	1
FALSE	High	Master Protein	Q13724	Mannosyl-oligosaccharide glucosidase OS=Homo sapiens OX=9606 GN=MOGS PE=1 SV=5	0	93.537	28	22	131	22	837	91.9	8.9	64789		22		0	0	0.813	0.91	1.022	0.47	0.999286	0.966518	0.954707	0.978392	14.12	33.54	16.59	12.41	108.7	107.5	115.1	117.5	57.8	High	High	High	High	High	1
FALSE	High	Master Protein	P27824	Calnexin OS=Homo sapiens OX=9606 GN=CANX PE=1 SV=2	0	92.94	33	23	81	22	592	67.5	4.6	29313		23		0	1	1.423	1.091	1.593	1.447	0.988291	0.98875	0.686742	0.971083	19.9	23.43	54.57	26.09	96.2	67.4	91.4	64.2	98	High	High	High	High	High	1
FALSE	High	Master Protein	Q02413	Desmoglein-1 OS=Homo sapiens OX=9606 GN=DSG1 PE=1 SV=2	0	92.793	21	17	66	17	1049	113.7	5.03	23197		17		0	0	0.253	0.383	0.342	0.114	0.652476	0.0964383	0.00556446	0.734433	29.69	29.58	41.39	42.42	39	58.6	46.4	175.4	20.2	High	High	High	High	High	1
FALSE	High	Master Protein	P22059	Oxysterol-binding protein 1 OS=Homo sapiens OX=9606 GN=OSBP PE=1 SV=1	0	91.913	37	24	54	23	807	89.4	7.3	22150		24		0	2	8.632	3.458	2.683	17.089	0.205423	0.0381157	0.0687419	0.468193	80.74	67.48	128.7	114.34	90.7	109	71.4	112	144.8	High	High	Peak Found	Peak Found	High	1
FALSE	High	Master Protein	P06756	Integrin alpha-V OS=Homo sapiens OX=9606 GN=ITGAV PE=1 SV=2	0	91.222	22	22	96	22	1048	116	5.68	39145		22		0	0	1.107	1.256	1.188	0.856	0.999286	0.950576	0.987625	0.999163	19.08	17.57	32.5	24.29	120.7	115	89.5	97.8	83.8	High	High	High	High	High	1
FALSE	High	Master Protein	O95373	Importin-7 OS=Homo sapiens OX=9606 GN=IPO7 PE=1 SV=1	0	90.705	25	23	131	22	1038	119.4	4.82	56810		23		0	1	0.766	0.789	1.06	0.1	0.999286	0.862358	0.973985	0.711352	24.39	44.05	20.31	25.9	110.1	115	144.4	144.9	15.6	High	High	High	High	High	1
FALSE	High	Master Protein	P68133	Actin, alpha skeletal muscle OS=Homo sapiens OX=9606 GN=ACTA1 PE=1 SV=1	0	89.165	34	15	103	1	377	42	5.39	50780		15		0	0	1.356	0.722	0.457	1.263	0.999286	0.788346	0.0472684	0.982359	28.57	59.61	103.2	56.41	137.7	60.7	39.2	92.4	143.5	Peak Found	Peak Found	Peak Found	Peak Found	Peak Found	1
FALSE	High	Master Protein	Q8IXB1	DnaJ homolog subfamily C member 10 OS=Homo sapiens OX=9606 GN=DNAJC10 PE=1 SV=2	0	88.268	30	22	117	21	793	91	7.18	47912		22		0	1	1.003	1.079	1.214	0.569	0.999286	0.996201	0.982514	0.982616	17.46	15.88	10.14	16.32	103.6	103.8	117.1	103.3	61.9	High	High	High	High	High	1
FALSE	High	Master Protein	Q15437	Protein transport protein Sec23B OS=Homo sapiens OX=9606 GN=SEC23B PE=1 SV=2	0	87.811	33	21	87	19	767	86.4	6.89	35477		21		0	0	7.226	7.245	3.271	10.651	0.263206	0.000173853	0.0184225	0.5858	47.56	41.1	84.2	39.34	142.4	121.5	55.1	13.8	180.4	High	High	High	High	High	1
FALSE	High	Master Protein	Q99613	Eukaryotic translation initiation factor 3 subunit C OS=Homo sapiens OX=9606 GN=EIF3C PE=1 SV=1	0	86.66	20	18	77	18	913	105.3	5.68	36633		18		0	0	9.74	6.538	4.414	10.904	0.16636	0.000421472	0.00141561	0.580033	46.22	25.8	26.3	38.78	158.4	129.7	74.5	14.3	205.1	High	High	High	Peak Found	High	1
FALSE	High	Master Protein	P14735	Insulin-degrading enzyme OS=Homo sapiens OX=9606 GN=IDE PE=1 SV=4	0	86.559	24	25	109	25	1019	117.9	6.61	46708		25		0	0	1.034	1.101	1.817	0.134	0.999286	0.986398	0.472933	0.753347	34.72	21.27	40.81	27.42	118.3	126.3	193.6	121.6	17.3	High	High	High	High	High	1
FALSE	High	Master Protein	O43592	Exportin-T OS=Homo sapiens OX=9606 GN=XPOT PE=1 SV=2	0	86.028	21	17	50	17	962	109.9	5.39	20132		17		0	0	6.431	5.243	3.984	18.828	0.31109	0.00238957	0.00365172	0.441917	56.79	56.39	71.91	31.28	138.7	88.3	63.1	12.1	315.3	High	High	High	Peak Found	High	1
FALSE	High	Master Protein	Q9UKV8	Protein argonaute-2 OS=Homo sapiens OX=9606 GN=AGO2 PE=1 SV=3	0	85.761	32	25	129	17	859	97.1	9.19	44112		25		0	8	0.736	0.949	1	0.428	0.999286	0.986398	0.938672	0.971083	26.99	29.18	39.64	35.6	101.8	113.2	108.4	118.1	66.5	High	High	High	High	High	1
FALSE	High	Master Protein	Q15031	Probable leucine--tRNA ligase, mitochondrial OS=Homo sapiens OX=9606 GN=LARS2 PE=1 SV=2	0	85.561	25	21	135	21	903	101.9	8.22	59491		21		0	0	1.03	0.998	1.147	0.869	0.999286	0.986398	0.99817	0.996927	12.86	18.46	13.59	26.22	104.2	99.5	105.9	92.2	89.4	High	High	High	High	High	1
FALSE	High	Master Protein	Q14315	Filamin-C OS=Homo sapiens OX=9606 GN=FLNC PE=1 SV=3	0	85.427	7	21	144	1	2725	290.8	5.97	63597		21		0	0	0.395	0.817	1.405	0.048	0.868081	0.893506	0.876678	0.353282	0	0	0	0	58.7	121.3	208.7	148.6	7.1	High	High	Peak Found	Peak Found	Peak Found	1
FALSE	High	Master Protein	P29144	Tripeptidyl-peptidase 2 OS=Homo sapiens OX=9606 GN=TPP2 PE=1 SV=4	0	85.278	24	27	139	27	1249	138.3	6.32	48217		27		0	0	0.44	0.941	1.046	0.117	0.921047	0.985987	0.969118	0.737644	25.92	15.98	21.15	25.09	72.2	138.2	157.3	163.2	19	High	High	High	High	High	1
FALSE	High	Master Protein	A0AVT1	Ubiquitin-like modifier-activating enzyme 6 OS=Homo sapiens OX=9606 GN=UBA6 PE=1 SV=1	0	83.883	23	22	123	22	1052	117.9	6.14	44921		22		0	0	0.331	0.813	0.898	0.085	0.815691	0.88996	0.836063	0.665525	23.4	24.03	17.42	40.74	56.5	150.3	142	183.5	13.5	High	High	High	High	High	1
FALSE	High	Master Protein	Q9NYU2	UDP-glucose:glycoprotein glucosyltransferase 1 OS=Homo sapiens OX=9606 GN=UGGT1 PE=1 SV=3	0	83.844	17	24	101	24	1555	177.1	5.63	39160		24		0	0	0.496	0.905	0.877	0.129	0.962576	0.966518	0.803124	0.749465	21.62	24.42	40.79	74.85	76.8	138.8	134.9	159.1	8.7	High	High	High	High	Peak Found	1
FALSE	High	Master Protein	O60568	Multifunctional procollagen lysine hydroxylase and glycosyltransferase LH3 OS=Homo sapiens OX=9606 GN=PLOD3 PE=1 SV=1	0	83.639	30	21	92	21	738	84.7	6.05	44346		21		0	0	2.298	2.796	3.369	1.174	0.872556	0.115175	0.0150416	0.982616	31.83	16.78	46.59	18.78	152.1	142.1	127.1	62.2	57.6	High	High	High	High	High	1
FALSE	High	Master Protein	Q01433	AMP deaminase 2 OS=Homo sapiens OX=9606 GN=AMPD2 PE=1 SV=2	0	83.546	25	22	38	22	879	100.6	6.93	17350		22		0	0	2.926	2.247	2.198	12.455	0.752363	0.287023	0.206513	0.5474	33.45	87.11	0	0.89	95.3	101.5	76.4	2.1	476.5	High	High	Peak Found	Peak Found	High	1
FALSE	High	Master Protein	Q9BSJ8	Extended synaptotagmin-1 OS=Homo sapiens OX=9606 GN=ESYT1 PE=1 SV=1	0	82.634	20	18	82	17	1104	122.8	5.83	33525		18		0	1	4.661	1.771	1.418	0.651	0.477035	0.580192	0.866574	0.984872	27.95	30.81	46.6	35.56	160.4	60.2	46.8	32.3	24.6	High	High	High	High	High	1
FALSE	High	Master Protein	O00159	Unconventional myosin-Ic OS=Homo sapiens OX=9606 GN=MYO1C PE=1 SV=4	0	82.609	22	23	124	21	1063	121.6	9.41	45903		23		0	2	0.852	0.917	1.052	0.189	0.999286	0.972472	0.972863	0.819276	12.1	31.28	37.91	55.12	107.1	106.4	117.1	123.9	22.7	High	High	High	High	High	1
FALSE	High	Master Protein	O95678	Keratin, type II cytoskeletal 75 OS=Homo sapiens OX=9606 GN=KRT75 PE=1 SV=2	0	81.608	22	20	91	1	551	59.5	7.74	45726		20		0	0	0.01	6.864	0.01	1.025	5.33141e-17	0.000282988	5.41217e-17	0.847002		0		0		508.3		74.1	75.9	Not Found	High	Not Found	Peak Found	Peak Found	1
FALSE	High	Master Protein	P40763	Signal transducer and activator of transcription 3 OS=Homo sapiens OX=9606 GN=STAT3 PE=1 SV=2	0	80.376	31	21	27	21	770	88	6.3	12689		21		0	0	0.502	1.117	0.801	0.422	0.9629	0.986398	0.653887	0.967545	0	0	0	0	93.8	137.7	80	74.1	275.1	High	High	Peak Found	Peak Found	High	1
FALSE	High	Master Protein	Q09161	Nuclear cap-binding protein subunit 1 OS=Homo sapiens OX=9606 GN=NCBP1 PE=1 SV=1	0	80.302	25	16	94	16	790	91.8	6.43	35925		16		0	0	1.373	1.124	1.328	0.762	0.999286	0.986398	0.92938	0.999163	17.58	31.35	24.64	34.76	119.9	103.6	107	89.1	66.2	High	High	High	High	High	1
FALSE	High	Master Protein	O43747	AP-1 complex subunit gamma-1 OS=Homo sapiens OX=9606 GN=AP1G1 PE=1 SV=5	0	79.392	21	19	28	19	822	91.3	6.8	14528		19		0	0	1.481	2.804	1.849	20.494	0.985423	0.113513	0.443347	0.420195	39.52	35.75	32.32	53.83	70	84.5	52.9	33.6	443.1	High	High	Peak Found	Peak Found	High	1
FALSE	High	Master Protein	P47712	Cytosolic phospholipase A2 OS=Homo sapiens OX=9606 GN=PLA2G4A PE=1 SV=2	0	79.369	26	16	27	16	749	85.2	5.38	13309		16		0	0	3.253	1.849	1.469	57.661	0.697242	0.520374	0.819149	0.197715	18.39	42.88	53.22	46.73	34.5	24.9	20	38.4	683.5	High	High	Peak Found	Peak Found	High	1
FALSE	High	Master Protein	P68104	Elongation factor 1-alpha 1 OS=Homo sapiens OX=9606 GN=EEF1A1 PE=1 SV=1	0	79.094	27	15	111	15	462	50.1	9.01	62327		15		0	0	0.85	1.271	1.145	0.742	0.999286	0.948619	0.99817	0.996927	18.58	14.91	15.48	31.55	90.1	130.3	121.7	109.4	83.9	High	High	High	High	High	1
FALSE	High	Master Protein	O00469	Procollagen-lysine,2-oxoglutarate 5-dioxygenase 2 OS=Homo sapiens OX=9606 GN=PLOD2 PE=1 SV=2	0	78.035	27	19	95	19	737	84.6	6.71	41764		19		0	0	1.107	1.208	1.117	1.218	0.999286	0.97356	0.997039	0.982616	32.6	24.94	18.43	19.8	97.7	110.8	95	89.1	107.9	High	High	High	High	High	1
FALSE	High	Master Protein	Q9NTJ3	Structural maintenance of chromosomes protein 4 OS=Homo sapiens OX=9606 GN=SMC4 PE=1 SV=2	0	77.83	18	23	79	23	1288	147.1	6.79	32886		23		0	0	0.185	1.13	0.961	0.03	0.467989	0.986398	0.918749	0.406964	36.1	16.14	15.05	69.53	35.9	231.5	162.9	204.9	2	High	High	High	High	Peak Found	1
FALSE	High	Master Protein	P06733	Alpha-enolase OS=Homo sapiens OX=9606 GN=ENO1 PE=1 SV=2	0	77.638	48	19	113	19	434	47.1	7.39	47738		19		0	0	0.313	0.765	0.898	0.13	0.785409	0.84561	0.836259	0.751906	30.53	27.44	38.89	21	48.4	119.1	143.9	173.2	17.9	High	High	High	High	High	1
FALSE	High	Master Protein	P29401	Transketolase OS=Homo sapiens OX=9606 GN=TKT PE=1 SV=3	0	77.315	33	17	107	17	623	67.8	7.66	48344		17		0	0	0.414	0.788	1.046	0.174	0.90325	0.862357	0.969118	0.8087	10.22	36.77	31.99	26.53	62.6	119.9	170.1	153.7	28.5	High	High	High	High	High	1
FALSE	High	Master Protein	A0A6I8PL42	Leucyl-tRNA synthetase OS=Homo sapiens OX=9606 GN=LARS1 PE=1 SV=1	0	77.046	20	22	97	22	1130	129.1	7.87	34775		22		0	0	0.563	0.952	1.308	0.193	0.977307	0.986398	0.932939	0.823339	33.22	31.34	23.42	24.11	83.3	147.4	161.2	146	25.4	High	High	High	High	High	1
FALSE	High	Master Protein	Q7L576	Cytoplasmic FMR1-interacting protein 1 OS=Homo sapiens OX=9606 GN=CYFIP1 PE=1 SV=1	0	76.704	20	23	84	23	1253	145.1	6.9	32718		23		0	0	0.307	0.89	0.783	0.069	0.770208	0.951175	0.619103	0.615469	19.69	15.64	26.75	16.72	54.5	164.5	140.1	202	8.9	High	High	High	High	High	1
FALSE	High	Master Protein	Q13740	CD166 antigen OS=Homo sapiens OX=9606 GN=ALCAM PE=1 SV=2	0	76.693	29	17	122	17	583	65.1	6.25	46621		17		0	0	0.772	1.058	1.064	0.447	0.999286	0.999106	0.976793	0.971083	22.45	43.24	45.79	32	97.2	122.2	129.5	121.5	51.1	High	High	High	High	High	1
FALSE	High	Master Protein	B1AXG1	Non-specific serine/threonine protein kinase OS=Homo sapiens OX=9606 GN=RPS6KA3 PE=1 SV=2	0	75.466	26	17	18	11	711	80.7	8.28	10953		17		0	0	4.455	4.106	2.979	28	0.426138	0.0131921	0.087935	0.348735	0	27.82	41.11	11.68	67.2	48.5	78.1	5.8	633.2	Peak Found	Peak Found	Peak Found	Peak Found	High	1
FALSE	High	Master Protein	A0A2R8YCH5	Catenin beta-1 (Fragment) OS=Homo sapiens OX=9606 GN=CTNNB1 PE=1 SV=1	0	75.277	29	18	20	13	779	85.2	5.92	11191		18		0	1	0.733	1.517	1.051	7.729	0.999286	0.81046	0.954707	0.661402	58.54	34.19	21.24	19.73	32.2	62.8	61.7	39.6	540.4	Peak Found	Peak Found	Peak Found	Peak Found	High	1
FALSE	High	Master Protein	A0A0G2JS82	AP-2 complex subunit alpha-2 (Fragment) OS=Homo sapiens OX=9606 GN=AP2A2 PE=1 SV=1	0	74.806	21	18	23	11	917	101.6	6.86	12253		18		0	0	1.311	2.112	1.832	14.563	0.985423	0.354253	0.666368	0.507685	30.14	14.31	19.9	28.67	17.1	85.3	24.6	34.4	712.2	Peak Found	Peak Found	Peak Found	Peak Found	High	1
FALSE	High	Master Protein	Q15418	Ribosomal protein S6 kinase alpha-1 OS=Homo sapiens OX=9606 GN=RPS6KA1 PE=1 SV=2	0	74.113	30	18	23	12	735	82.7	7.83	10085		18		0	6	3.782	2.578	4.305	4.807	0.597417	0.167276	0.00179605	0.753347	107.19	92.88	61.32	107.76	94.8	111.5	106.9	36.6	356	Peak Found	Peak Found	Not Found	Peak Found	High	1
FALSE	High	Master Protein	A0A0G2JIW1	Heat shock 70 kDa protein 1B OS=Homo sapiens OX=9606 GN=HSPA1B PE=1 SV=1	0	74.092	33	19	100	15	642	70.1	5.66	41808		19		0	1	0.435	0.636	0.986	0.14	0.916708	0.60323	0.932017	0.762238	40.97	29.2	32.5	19.82	63.2	109.1	154.9	176.2	18.6	High	High	High	High	High	1
FALSE	High	Master Protein	Q9H2U1	ATP-dependent DNA/RNA helicase DHX36 OS=Homo sapiens OX=9606 GN=DHX36 PE=1 SV=2	0	73.801	24	20	105	19	1008	114.7	7.68	42708		20		0	1	0.831	0.927	0.948	0.268	0.999286	0.981015	0.898226	0.892247	22.39	36.94	30.07	24.45	104.4	110.9	103.6	123.7	31.9	High	High	High	High	High	1
FALSE	High	Master Protein	P32004	Neural cell adhesion molecule L1 OS=Homo sapiens OX=9606 GN=L1CAM PE=1 SV=2	0	70.029	16	18	102	18	1257	139.9	6.24	45698		18		0	0	0.719	0.97	0.942	0.327	0.999286	0.986398	0.894219	0.927415	19.41	32.54	67.82	37.7	86.4	128.5	135.6	131.1	43.6	High	High	High	High	High	1
FALSE	High	Master Protein	Q9H3S7	Tyrosine-protein phosphatase non-receptor type 23 OS=Homo sapiens OX=9606 GN=PTPN23 PE=1 SV=1	0	69.87	15	20	71	20	1636	178.9	6.92	27549		20		0	0	4.393	2.669	1.864	0.575	0.507811	0.143074	0.428562	0.982616	38.9	16.93	45.61	32.71	151.8	102.2	71	30.9	21.2	High	High	High	High	High	1
FALSE	High	Master Protein	D6REX3	Protein transport protein Sec31A OS=Homo sapiens OX=9606 GN=SEC31A PE=1 SV=1	0	69.808	15	17	35	17	1251	136.1	6.98	16460		17		0	0	13.196	15.873	7.568	28.82	0.0906501	3.2308e-08	2.71063e-06	0.342287	48.05	40.09	17.66	48.43	168.2	169.2	82.1	2.5	345.6	High	High	High	Peak Found	High	1
FALSE	High	Master Protein	P23246	Splicing factor, proline- and glutamine-rich OS=Homo sapiens OX=9606 GN=SFPQ PE=1 SV=2	0	69.018	28	17	23	17	707	76.1	9.44	11287		17		0	0	6.593	1.578	3.982	19.835	0.304889	0.748875	0.0268347	0.428916	114.28	96.16	129.98	78.51	79.7	65.1	11.1	6.1	576.5	High	Peak Found	Peak Found	Peak Found	High	1
FALSE	High	Master Protein	Q15393	Splicing factor 3B subunit 3 OS=Homo sapiens OX=9606 GN=SF3B3 PE=1 SV=4	0	68.3	16	19	92	19	1217	135.5	5.26	36656		19		0	0	0.714	0.994	1.133	0.297	0.999286	0.986398	0.99817	0.910719	23.32	20.56	17.04	25.08	102.4	122.6	146.9	133.4	31.5	High	High	High	High	High	1
FALSE	High	Master Protein	J3KR97	Tubulin-specific chaperone D OS=Homo sapiens OX=9606 GN=TBCD PE=1 SV=1	0	66.029	16	17	87	17	1230	136.5	6.34	37846		17		0	0	0.639	0.929	0.929	0.115	0.999286	0.982133	0.88221	0.734433	17.11	15.11	24.73	26.03	92.9	125.7	129.9	157.3	13.4	High	High	High	High	High	1
FALSE	High	Master Protein	P13667	Protein disulfide-isomerase A4 OS=Homo sapiens OX=9606 GN=PDIA4 PE=1 SV=2	0	65.798	36	20	103	20	645	72.9	5.07	33245		20		0	0	0.418	0.859	1.014	0.208	0.905609	0.938898	0.950827	0.838944	26.44	14.48	49.49	34.93	65.3	111.3	156	138.1	36.4	High	High	High	High	High	1
FALSE	High	Master Protein	A0A0C4DG89	RNA helicase OS=Homo sapiens OX=9606 GN=DDX46 PE=1 SV=1	0	65.595	17	16	17	16	1032	117.4	9.29	9575		16		0	0	100	100	100	100	5.33141e-17	6.62708e-17	5.41217e-17	3.00121e-17					28.5	42.1	23.3		763.1	Peak Found	Peak Found	Peak Found	Not Found	High	1
FALSE	High	Master Protein	P26006	Integrin alpha-3 OS=Homo sapiens OX=9606 GN=ITGA3 PE=1 SV=5	0	65.455	12	13	70	13	1051	116.5	6.77	37282		13		0	0	1.779	2.196	2.316	0.899	0.962576	0.307275	0.160065	0.993586	17.58	10.94	30.41	22.39	128.3	145.4	153.4	70.4	66.9	High	High	High	High	High	1
FALSE	High	Master Protein	M0R2B7	DNA polymerase OS=Homo sapiens OX=9606 GN=POLD1 PE=1 SV=1	0	64.92	18	19	78	19	1133	126.3	7.21	30185		19		0	0	0.773	0.885	1.45	0.166	0.999286	0.950576	0.832843	0.801017	20.15	16.04	24.87	18.38	80.3	85.6	167.6	161.8	21.2	High	High	High	High	High	1
FALSE	High	Master Protein	Q32P28	Prolyl 3-hydroxylase 1 OS=Homo sapiens OX=9606 GN=P3H1 PE=1 SV=2	0	62.827	22	14	25	14	736	83.3	5.14	12522		14		0	0	8.619	4.495	2.86	26.648	0.205423	0.00736676	0.0654454	0.361054	8.65	96.5	10.8	34.52	77.6	59.9	34	3.2	624.1	High	High	High	Peak Found	High	1
FALSE	High	Master Protein	Q92616	eIF-2-alpha kinase activator GCN1 OS=Homo sapiens OX=9606 GN=GCN1 PE=1 SV=6	0	62.71	8	21	43	21	2671	292.6	7.47	17392		21		0	0	7.788	5.665	4.733	3.864	0.237294	0.00135497	0.000716042	0.801017	100.84	71.87	60.16	92.19	186.1	134	106.2	28.3	66.1	High	High	Peak Found	High	High	1
FALSE	High	Master Protein	P07237	Protein disulfide-isomerase OS=Homo sapiens OX=9606 GN=P4HB PE=1 SV=3	0	62.63	36	18	72	18	508	57.1	4.87	28115		18		0	0	0.428	0.789	0.984	0.164	0.914454	0.862357	0.931985	0.801017	7.65	19.61	26.1	23.48	68.7	123.9	156.4	169.8	26.8	High	High	High	High	High	1
FALSE	High	Master Protein	F8W7S5	Ribosome-binding protein 1 OS=Homo sapiens OX=9606 GN=RRBP1 PE=1 SV=1	0	62.459	31	19	27	19	751	84.3	5.01	9899		19		0	0	5.418	14.176		15.163	0.401116	1.35013e-07		0.499094	0	0		0	127.3	195	120	0.9	245.2	High	High	Peak Found	Peak Found	High	1
FALSE	High	Master Protein	O00203	AP-3 complex subunit beta-1 OS=Homo sapiens OX=9606 GN=AP3B1 PE=1 SV=3	0	62.147	20	20	52	20	1094	121.2	6.04	22770		20		0	0	17.494	5.618	3.992	4.449	0.0509766	0.00144324	0.00358434	0.767973	9.15	67.63	31.63	41.47	192.1	64.9	52.1	12.6	52.4	High	High	Peak Found	Peak Found	High	1
FALSE	High	Master Protein	Q2NL82	Pre-rRNA-processing protein TSR1 homolog OS=Homo sapiens OX=9606 GN=TSR1 PE=1 SV=1	0	61.736	21	14	17	14	804	91.8	7.42	7860		14		0	0	100		100	100	5.33141e-17		5.41217e-17	3.00121e-17					5.4		11.5		874.5	Peak Found	Not Found	Peak Found	Not Found	High	1
FALSE	High	Master Protein	P49792	E3 SUMO-protein ligase RanBP2 OS=Homo sapiens OX=9606 GN=RANBP2 PE=1 SV=2	0	61.278	8	20	41	20	3224	358	6.2	13676		20		0	0	9.381	5.309	3.303	8.004	0.17682	0.00217139	0.0171762	0.656154	54.52	66.35	31.1	48.61	154.6	86.6	61.6	9.7	164.2	High	High	Peak Found	Peak Found	High	1
FALSE	High	Master Protein	Q93009	Ubiquitin carboxyl-terminal hydrolase 7 OS=Homo sapiens OX=9606 GN=USP7 PE=1 SV=2	0	61.031	19	18	68	18	1102	128.2	5.55	24610		18		0	0	0.34	1.006	1.096	0.05	0.827214	0.986398	0.987625	0.540113	24.77	11.72	39.95	5.24	54.6	161.1	187.9	159.4	3.6	High	High	High	High	Peak Found	1
FALSE	High	Master Protein	Q86TI2	Dipeptidyl peptidase 9 OS=Homo sapiens OX=9606 GN=DPP9 PE=1 SV=3	0	60.931	23	18	91	18	863	98.2	6.46	37058		18		0	0	0.904	0.936	0.904	0.56	0.999286	0.984695	0.844447	0.982616	23.74	36.28	40.43	37.24	99.2	107.5	110.6	115.2	65.1	High	High	High	High	High	1
FALSE	High	Master Protein	Q8NCN5	Pyruvate dehydrogenase phosphatase regulatory subunit, mitochondrial OS=Homo sapiens OX=9606 GN=PDPR PE=1 SV=2	0	60.895	19	16	46	16	879	99.3	6.35	22318		16		0	0	8.987	6.081	4.64	12.224	0.191639	0.00077308	0.000870908	0.552364	35.2	23.37	11.12	29.83	124.7	87.9	65.7	15	193.1	High	High	Peak Found	Peak Found	High	1
FALSE	High	Master Protein	P13646	Keratin, type I cytoskeletal 13 OS=Homo sapiens OX=9606 GN=KRT13 PE=1 SV=4	0	60.877	24	12	74	3	458	49.6	4.96	39236		12		0	2	3.713	1.275	0.524	0.43	0.610951	0.94499	0.121246	0.982359	82.68	41.58	0	0	254.6	93.8	20.7	88.2	22.9	High	Peak Found	Peak Found	Peak Found	Peak Found	1
FALSE	High	Master Protein	E7EX73	Eukaryotic translation initiation factor 4 gamma 1 OS=Homo sapiens OX=9606 GN=EIF4G1 PE=1 SV=1	0	60.667	14	17	18	17	1436	158.5	5.21	8049		17		0	0	1.515	1.084	2.556	8.478	0.977307	0.992008	0.149142	0.63771	10.28	5.08	41.23	88.88	43.1	31.6	65.1	27.2	614	Peak Found	Peak Found	Peak Found	Peak Found	High	1
FALSE	High	Master Protein	O60313	Dynamin-like 120 kDa protein, mitochondrial OS=Homo sapiens OX=9606 GN=OPA1 PE=1 SV=3	0	60.631	18	16	28	16	960	111.6	7.87	11991		16		0	0	2.744	2.052	2.055	5.217	0.79232	0.387329	0.285949	0.745538	25.33	24.75	33.13	25.37	130.7	94.4	82.8	48.7	218.5	High	High	Peak Found	Peak Found	High	1
FALSE	High	Master Protein	Q9Y5L0-1	Isoform 1 of Transportin-3 OS=Homo sapiens OX=9606 GN=TNPO3	0	60.454	19	16	57	16	957	107.9	5.71	22252		16		0	0	1.425	1.421	1.268	1.879	0.988291	0.862357	0.956009	0.940202	30.36	22.95	29.48	32.34	124.1	107	95.4	74.5	144.2	High	High	High	High	High	1
FALSE	High	Master Protein	Q71U36	Tubulin alpha-1A chain OS=Homo sapiens OX=9606 GN=TUBA1A PE=1 SV=1	0	60.083	40	14	64	6	451	50.1	5.06	23020		14		0	8	1.188	1.117	0.93	1.852	0.999286	0.986398	0.88221	0.941302	51.3	35.02	69.25	48.29	97.1	109	117.9	107.5	174.9	High	High	High	High	High	1
FALSE	High	Master Protein	P52888	Thimet oligopeptidase OS=Homo sapiens OX=9606 GN=THOP1 PE=1 SV=2	0	60.026	25	17	52	17	689	78.8	6.05	21498		17		0	0	3.26	1.813	2.449	2.498	0.69583	0.549623	0.119086	0.881535	21.44	24.53	34.35	20.77	166.1	101.3	131.1	47.4	132.9	High	High	High	High	High	1
FALSE	High	Master Protein	O15357	Phosphatidylinositol 3,4,5-trisphosphate 5-phosphatase 2 OS=Homo sapiens OX=9606 GN=INPPL1 PE=1 SV=2	0	59.397	15	18	48	16	1258	138.5	6.54	19364		18		0	2	8.123	6.395	4.962	0.733	0.225723	0.000508371	0.000438203	0.996927	44.19	26.53	29.61	40.06	173.7	113.1	82.6	15.2	12.8	High	High	High	Peak Found	High	1
FALSE	High	Master Protein	Q14980	Nuclear mitotic apparatus protein 1 OS=Homo sapiens OX=9606 GN=NUMA1 PE=1 SV=2	0	58.69	9	19	41	18	2115	238.1	5.78	15464		19		0	0	0.927	0.367	4.661	0.158	0.999286	0.0778985	0.000833103	0.795784	83.8	23.86	114.08	72.5	132.9	71.6	155.1	39.1	12.3	High	High	High	Peak Found	Peak Found	1
FALSE	High	Master Protein	Q9Y5K6	CD2-associated protein OS=Homo sapiens OX=9606 GN=CD2AP PE=1 SV=1	0	58.471	29	16	16	16	639	71.4	6.4	8160		16		0	0	1.047	1.015	1.384	12.251	0.999286	0.98845	0.891231	0.551722	39.66	0	0	104.06	53	69.4	86.7	66.7	410.5	Peak Found	Peak Found	Peak Found	Peak Found	High	1
FALSE	High	Master Protein	O60645	Exocyst complex component 3 OS=Homo sapiens OX=9606 GN=EXOC3 PE=1 SV=3	0	58.347	20	14	42	14	745	85.5	6.29	17825		14		0	0	5.898	2.191	1.692	3.989	0.354206	0.30982	0.591065	0.798961	15.67	38.22	14.12	32.87	182.7	70.5	48.4	16.9	154.8	High	High	Peak Found	Peak Found	High	1
FALSE	High	Master Protein	O00139	Kinesin-like protein KIF2A OS=Homo sapiens OX=9606 GN=KIF2A PE=1 SV=3	0	58.272	22	16	17	15	706	79.9	6.68	8173		16		0	1		0.973	1.286	5.123		0.986398	0.985214	0.745538		0	0	0	18.4	38.8	16.5	7.8	789.5	Peak Found	Peak Found	Peak Found	Peak Found	High	1
FALSE	High	Master Protein	P11387	DNA topoisomerase 1 OS=Homo sapiens OX=9606 GN=TOP1 PE=1 SV=2	0	57.886	19	15	31	12	765	90.7	9.31	15005		15		0	3	7.84	6.61	5.303	14.187	0.235708	0.000388173	0.000903357	0.516222	46.1	29.14	38.79	24.29	152.3	114.1	29.3	7.7	278.1	High	High	High	Peak Found	High	1
FALSE	High	Master Protein	A0A087WVM4	Formyltetrahydrofolate synthetase OS=Homo sapiens OX=9606 GN=MTHFD1L PE=1 SV=1	0	57.768	17	14	48	12	913	99.2	7.27	20597		14		0	0	7.171	5.89	4.418	6.835	0.266473	0.000997065	0.00140638	0.694716	20.56	4.43	2.32	15.07	152.1	127.7	76.9	12	168.4	High	High	High	Peak Found	High	1
FALSE	High	Master Protein	G3V1R5	Nardilysin OS=Homo sapiens OX=9606 GN=NRDC PE=1 SV=1	0	57.698	16	16	61	16	1087	125	4.91	25621		16		0	0	0.43	0.821	1.189	0.104	0.916708	0.898728	0.987625	0.722881	22.9	14.54	20.36	5.4	72.2	130.4	208.7	172.4	8.7	High	High	High	High	High	1
FALSE	High	Master Protein	Q13085	Acetyl-CoA carboxylase 1 OS=Homo sapiens OX=9606 GN=ACACA PE=1 SV=2	0	57.346	9	19	65	19	2346	265.4	6.37	19826		19		0	0	0.715	1.043	1.084	0.127	0.999286	0.997378	0.987625	0.745538	27.56	19.43	23.42	69.32	83.8	123.8	161.8	121.8	10.9	High	High	High	High	Peak Found	1
FALSE	High	Master Protein	O00429	Dynamin-1-like protein OS=Homo sapiens OX=9606 GN=DNM1L PE=1 SV=2	0	57.112	23	14	18	14	736	81.8	6.81	8971		14		0	0	2.175	1.502	1.745	12.412	0.891446	0.8209	0.698441	0.54741	16.32	15.29	26.99	9.53	74.6	58.4	30.9	23.7	577.7	High	Peak Found	Peak Found	Peak Found	High	1
FALSE	High	Master Protein	P17858	ATP-dependent 6-phosphofructokinase, liver type OS=Homo sapiens OX=9606 GN=PFKL PE=1 SV=6	0	57.08	12	9	83	1	780	85	7.5	37724		9		0	0	2.072	0.428	0.496	1.233	0.909077	0.162779	0.0714468	0.982616	0	0	0	0	202.4	41.8	48.4	97.7	120.4	High	High	Peak Found	High	High	1
FALSE	High	Master Protein	P78347	General transcription factor II-I OS=Homo sapiens OX=9606 GN=GTF2I PE=1 SV=2	0	56.836	16	15	19	15	998	112.3	6.39	9403		15		0	0	3.346	2.849	2.932	11.697	0.674648	0.10556	0.0964008	0.561597	25.62	19.34	63.38	29.15	129.9	90.1	44.2	14.6	523.3	High	Peak Found	Peak Found	Peak Found	High	1
FALSE	High	Master Protein	P27816	Microtubule-associated protein 4 OS=Homo sapiens OX=9606 GN=MAP4 PE=1 SV=3	0	56.781	18	17	20	17	1152	120.9	5.43	8378		17		0	0	0.47	0.557		10.396	0.895302	0.425599		0.590777	0	31.02		69.85	3.8	5.4	50.8	36.7	791.1	Peak Found	Peak Found	Peak Found	Peak Found	High	1
FALSE	High	Master Protein	Q14444	Caprin-1 OS=Homo sapiens OX=9606 GN=CAPRIN1 PE=1 SV=2	0	56.755	27	13	17	13	709	78.3	5.25	9092		13		0	0	1.743	2.258	0.01	44.743	0.872556	0.284816	5.41217e-17	0.245038	100.42	0		68.37	8.2	6.1		4.2	866.2	Peak Found	Peak Found	Not Found	Peak Found	High	1
FALSE	High	Master Protein	P39023	60S ribosomal protein L3 OS=Homo sapiens OX=9606 GN=RPL3 PE=1 SV=2	0	56.234	34	13	76	13	403	46.1	10.18	35179		13		0	0	1.47	1.501	1.137	0.932	0.986955	0.822549	0.99817	0.988414	13.84	24.96	28.18	33.81	122.8	118.7	99.5	84.1	73.3	High	High	High	High	High	1
FALSE	High	Master Protein	P26038	Moesin OS=Homo sapiens OX=9606 GN=MSN PE=1 SV=3	0	55.156	25	18	66	12	577	67.8	6.4	28310		18		0	6	0.616	0.903	1.128	0.34	0.988291	0.966518	0.998113	0.939406	23.14	16.73	29.38	30.38	78.1	118.8	133	144.9	46.9	High	High	High	High	High	1
FALSE	High	Master Protein	Q12797	Aspartyl/asparaginyl beta-hydroxylase OS=Homo sapiens OX=9606 GN=ASPH PE=1 SV=3	0	54.473	22	15	23	14	758	85.8	5.01	11016		15		0	0	0.783	2.695	3.372	2.113	0.999286	0.136547	0.0149542	0.915968	0	50.05	0	1.14	30.6	175.9	122.3	54.3	320.4	Peak Found	Peak Found	Peak Found	Peak Found	High	1
FALSE	High	Master Protein	O95486	Protein transport protein Sec24A OS=Homo sapiens OX=9606 GN=SEC24A PE=1 SV=2	0	54.361	14	14	46	13	1093	119.7	7.66	16618		14		0	1	6.192	6.861	6.16	1.609	0.329712	0.000283952	3.78512e-05	0.964825	36.12	49.91	87.3	31.21	174.9	176.8	189.8	17.3	28	High	High	High	Peak Found	High	1
FALSE	High	Master Protein	P38646	Stress-70 protein, mitochondrial OS=Homo sapiens OX=9606 GN=HSPA9 PE=1 SV=2	0	54.06	27	15	86	12	679	73.6	6.16	30979		15		0	0	0.449	0.742	1.116	0.179	0.925771	0.826673	0.997039	0.810082	6.13	14.06	29.21	22.52	64.6	106.2	153.2	155	26.8	High	High	High	High	High	1
FALSE	High	Master Protein	A0A2R8YFH0	DNA mismatch repair protein OS=Homo sapiens OX=9606 GN=MSH2 PE=1 SV=1	0	53.74	17	16	57	16	918	102.8	6.18	23618		16		0	0	3.981	2.814	2.268	1.481	0.564502	0.111545	0.177867	0.971083	39.04	31.45	36.8	47.2	161.3	108.9	80.1	41.2	64	High	High	Peak Found	Peak Found	High	1
FALSE	High	Master Protein	Q8IZ83	Aldehyde dehydrogenase family 16 member A1 OS=Homo sapiens OX=9606 GN=ALDH16A1 PE=1 SV=2	0	53.462	18	12	67	12	802	85.1	6.79	30868		12		0	0	0.918	0.995	0.938	0.498	0.999286	0.986398	0.88991	0.98191	21.5	21.08	32.18	14.83	100.1	116.1	107.9	115	60	High	High	High	High	High	1
FALSE	High	Master Protein	Q9UL18	Protein argonaute-1 OS=Homo sapiens OX=9606 GN=AGO1 PE=1 SV=3	0	53.352	21	15	57	3	857	97.2	9.16	21534		15		0	4	0.84	0.947	1.127	0.406	0.999286	0.986398	0.998113	0.964825	13.82	6	7.82	15.64	108.1	126.2	97.5	130.1	60.2	High	Peak Found	Peak Found	High	High	1
FALSE	High	Master Protein	P05787	Keratin, type II cytoskeletal 8 OS=Homo sapiens OX=9606 GN=KRT8 PE=1 SV=7	0	53.281	15	13	73	2	483	53.7	5.59	35529		13		0	1	0.329	0.262	0.01	0.35	0.748369	0.0105838	5.41217e-17	0.956399	58.12	113.49		310.38	41	68.9		263.3	25.4	Peak Found	Peak Found	Not Found	High	High	1
FALSE	High	Master Protein	O14787-2	Isoform 2 of Transportin-2 OS=Homo sapiens OX=9606 GN=TNPO2	0	52.276	10	9	35	2	887	100.3	4.98	17745		9		0	0	100	100	100	100	5.33141e-17	6.62708e-17	5.41217e-17	3.00121e-17					134.7	101.5	98.7		360.3	High	High	Peak Found	Not Found	High	1
FALSE	High	Master Protein	P21980	Protein-glutamine gamma-glutamyltransferase 2 OS=Homo sapiens OX=9606 GN=TGM2 PE=1 SV=2	0	52.168	24	14	44	14	687	77.3	5.22	15336		14		0	0	0.857	1.352	1.955	0.423	0.999286	0.900403	0.357404	0.968571	27.4	16.92	43.26	34.04	69.2	120.2	127.7	78.2	49.8	High	High	High	High	High	1
FALSE	High	Master Protein	Q9UQE7	Structural maintenance of chromosomes protein 3 OS=Homo sapiens OX=9606 GN=SMC3 PE=1 SV=2	0	51.838	13	15	49	15	1217	141.5	7.18	18802		15		0	0	0.188	0.871	1.051	0.073	0.477035	0.94499	0.972863	0.629351	12.05	22.79	33.78	185.43	35.4	174.9	181.2	212.7	6.9	High	High	High	High	Peak Found	1
FALSE	High	Master Protein	P07355	Annexin A2 OS=Homo sapiens OX=9606 GN=ANXA2 PE=1 SV=2	0	51.7	42	15	55	15	339	38.6	7.75	18405		15		0	0	0.29	0.389	0.397	0.119	0.735618	0.104445	0.0184002	0.740601	26.97	67.37	61.66	86.2	73.7	88.6	92.1	243.3	11.9	High	High	High	High	High	1
FALSE	High	Master Protein	A0A0A0MT01	Actin-depolymerizing factor OS=Homo sapiens OX=9606 GN=GSN PE=1 SV=1	0	51.682	18	13	21	13	767	84.7	5.83	9615		13		0	0	0.923	0.843	0.437	2.703	0.999286	0.92375	0.0357936	0.865092	69.79	47.19	53.05	52.62	103.1	119.4	42.2	69.1	337.9	Peak Found	Peak Found	Peak Found	High	High	1
FALSE	High	Master Protein	O15031	Plexin-B2 OS=Homo sapiens OX=9606 GN=PLXNB2 PE=1 SV=3	0	51.649	8	12	82	12	1838	205	6.24	32926		12		0	0	0.709	0.999	1.039	0.36	0.999286	0.986398	0.963173	0.943738	14.89	5.65	16.85	23.42	85.8	119.8	143.3	122.4	42.3	High	High	High	High	High	1
FALSE	High	Master Protein	O00468-6	Isoform 6 of Agrin OS=Homo sapiens OX=9606 GN=AGRN	0	51.496	11	17	49	17	2045	214.7	6.4	17571		17		0	0	2.206	1.449	1.228	0.169	0.887933	0.84561	0.972863	0.803766	23.92	33.04	14.93	42.96	150.8	92.5	82.6	67.1	3.6	High	High	High	High	Peak Found	1
FALSE	High	Master Protein	P51003	Poly(A) polymerase alpha OS=Homo sapiens OX=9606 GN=PAPOLA PE=1 SV=4	0	50.897	21	14	18	14	745	82.8	7.37	9186		14		0	0	1.189	1.282	2.139	7.755	0.988291	0.941053	0.506778	0.661402	0	8.84	0	71.67	8.9	14.5	19	16.1	753.3	Peak Found	Peak Found	Peak Found	Peak Found	High	1
FALSE	High	Master Protein	Q9Y2L1	Exosome complex exonuclease RRP44 OS=Homo sapiens OX=9606 GN=DIS3 PE=1 SV=2	0	50.659	20	16	66	16	958	108.9	7.14	23697		16		0	0	1.271	0.958	1.031	0.296	0.999286	0.986398	0.959149	0.909921	26.68	15.85	24.04	13.23	125.2	94.6	85	95.5	32	High	High	High	High	High	1
FALSE	High	Master Protein	Q7Z3Y8	Keratin, type I cytoskeletal 27 OS=Homo sapiens OX=9606 GN=KRT27 PE=1 SV=2	0	50.284	10	7	68	1	459	49.8	5.05	36396		7		0	0																		Not Found	Not Found	Not Found	Not Found	Not Found	1
FALSE	High	Master Protein	Q96KG9	N-terminal kinase-like protein OS=Homo sapiens OX=9606 GN=SCYL1 PE=1 SV=1	0	49.931	20	15	15	15	808	89.6	6.3	7588		15		0	0	1.085	1.249	0.948	10.811	0.999286	0.950576	0.88221	0.580633	27.52	23.65	8.84	104.12	145.6	72.6	28.7	34.5	577.5	Peak Found	Peak Found	Peak Found	Peak Found	High	1
FALSE	High	Master Protein	Q96T76	MMS19 nucleotide excision repair protein homolog OS=Homo sapiens OX=9606 GN=MMS19 PE=1 SV=2	0	49.682	17	14	17	14	1030	113.2	6.35	7966		14		0	0	3.605	2.93	5.002	10.15	0.626423	0.092417	0.000288531	0.594297	4.69	34.25	0	17.02	124	82.8	105.6	7.1	434	High	Peak Found	Peak Found	Peak Found	High	1
FALSE	High	Master Protein	Q14683	Structural maintenance of chromosomes protein 1A OS=Homo sapiens OX=9606 GN=SMC1A PE=1 SV=2	0	49.394	12	15	47	15	1233	143.1	7.64	19916		15		0	0	0.218	0.765	1.01	0.413	0.561077	0.844731	0.949586	0.966819	15.07	13.73	24.85	79.55	84.9	151.1	159.6	141.2	29.3	High	High	High	High	Peak Found	1
FALSE	High	Master Protein	Q86Y56	Dynein assembly factor 5, axonemal OS=Homo sapiens OX=9606 GN=DNAAF5 PE=1 SV=4	0	48.243	20	15	17	15	855	93.5	6.42	7462		15		0	0	12.05	10.785	9.051	4.47	0.0928062	3.14172e-06	1.8177e-05	0.767616	0	0	0	0	99.1	118.2	81.4	4.1	468.2	Peak Found	Peak Found	Peak Found	Peak Found	High	1
FALSE	High	Master Protein	O60763	General vesicular transport factor p115 OS=Homo sapiens OX=9606 GN=USO1 PE=1 SV=2	0	48.163	17	15	33	15	962	107.8	4.91	12998		15		0	0	9.621	9.558	4.549	3.685	0.170087	1.15113e-05	0.00106533	0.808871	31.88	20.07	31.44	19.87	165.8	164.3	94.4	10.9	79.3	High	High	Peak Found	Peak Found	High	1
FALSE	High	Master Protein	P19012	Keratin, type I cytoskeletal 15 OS=Homo sapiens OX=9606 GN=KRT15 PE=1 SV=3	0	48.125	21	11	55	1	456	49.2	4.77	33005		11		0	0	0.01	0.01	0.01	0.01	5.33141e-17	6.62708e-17	5.41217e-17	3.00121e-17								900		Not Found	Not Found	Not Found	High	Not Found	1
FALSE	High	Master Protein	Q12965	Unconventional myosin-Ie OS=Homo sapiens OX=9606 GN=MYO1E PE=1 SV=2	0	46.81	14	15	76	15	1108	127	8.92	27045		15		0	0	1.513	1.028	1.351	0.741	0.985423	0.994204	0.918837	0.996927	12.63	22.71	20.37	46.87	138.2	93.5	123.9	93.4	70.1	High	High	High	High	High	1
FALSE	High	Master Protein	Q9NTZ6	RNA-binding protein 12 OS=Homo sapiens OX=9606 GN=RBM12 PE=1 SV=1	0	46.639	16	12	12	12	932	97.3	8.63	6603		12		0	0			0.01	20.533			5.41217e-17	0.420118				0	33	5.3		5.5	737.5	Peak Found	Peak Found	Not Found	Peak Found	High	1
FALSE	High	Master Protein	H0Y3P2	Eukaryotic translation initiation factor 4 gamma 2 OS=Homo sapiens OX=9606 GN=EIF4G2 PE=1 SV=1	0	46.556	16	14	21	14	869	98.1	6.99	9683		14		0	0	0.827	1.263	1.467	11.833	0.999286	0.950576	0.820862	0.561597	3.67	10.07	12.72	52.17	44.4	71.3	299.7	57	230.2	High	Peak Found	High	Peak Found	High	1
FALSE	High	Master Protein	Q9Y2A7	Nck-associated protein 1 OS=Homo sapiens OX=9606 GN=NCKAP1 PE=1 SV=1	0	46.541	13	17	54	17	1128	128.7	6.62	17909		17		0	0	0.376	1.033	0.832	0.097	0.872556	0.996923	0.717214	0.704209	15.47	15.33	25.74	30.01	64.1	169.4	129.3	168.8	33.5	High	High	High	High	High	1
FALSE	High	Master Protein	Q562R1	Beta-actin-like protein 2 OS=Homo sapiens OX=9606 GN=ACTBL2 PE=1 SV=2	0	46.266	18	8	50	1	376	42	5.59	21114		8		0	0	0.549	0.391	0.366	0.527	0.977307	0.107498	0.00985124	0.982616	0	0	0	0	103.2	73.6	68.7	188	99	High	Peak Found	High	High	High	1
FALSE	High	Master Protein	A0A0D9SFB1	Dynamin GTPase OS=Homo sapiens OX=9606 GN=DNM1 PE=1 SV=1	0	46.238	17	14	42	6	835	94	6.64	16905		14		0	0	8.994	3.768		9.373	0.172212	0.0225707		0.615469	0	0		0	177.6	63.9	6.5	5.7	241.4	High	Peak Found	Peak Found	Peak Found	High	1
FALSE	High	Master Protein	Q5XKE5	Keratin, type II cytoskeletal 79 OS=Homo sapiens OX=9606 GN=KRT79 PE=1 SV=2	0	45.843	13	11	62	1	535	57.8	7.2	31195		11		0	0	0.01	0.01	0.01	0.01	5.33141e-17	6.62708e-17	5.41217e-17	3.00121e-17								849.8		Not Found	Not Found	Not Found	High	Not Found	1
FALSE	High	Master Protein	Q9NVE7	4'-phosphopantetheine phosphatase OS=Homo sapiens OX=9606 GN=PANK4 PE=1 SV=1	0	45.626	22	15	18	15	773	85.9	6.28	6743		15		0	0		1.097				0.986651				0			122	66.5	26.9	11.9	405	Peak Found	High	Peak Found	Peak Found	High	1
FALSE	High	Master Protein	Q9UBF2	Coatomer subunit gamma-2 OS=Homo sapiens OX=9606 GN=COPG2 PE=1 SV=1	0	45.579	18	12	24	9	871	97.6	5.81	9601		12		0	0		100		100		6.62708e-17		3.00121e-17						32.2			867.8	Not Found	Peak Found	Not Found	Not Found	High	1
FALSE	High	Master Protein	R4GMQ1	Lysine-specific histone demethylase OS=Homo sapiens OX=9606 GN=KDM1A PE=1 SV=2	0	45.472	14	11	52	11	858	93.5	6.51	21935		11		0	0	1.113	0.998	1.177	0.197	0.999286	0.986398	0.991887	0.828969	18.54	31.92	22.13	21.52	111.4	99.6	122.9	106.3	17.8	High	High	High	High	High	1
FALSE	High	Master Protein	Q9UBC2	Epidermal growth factor receptor substrate 15-like 1 OS=Homo sapiens OX=9606 GN=EPS15L1 PE=1 SV=1	0	45.382	18	13	15	13	864	94.2	5.11	6479		13		0	0		100		100		6.62708e-17		3.00121e-17						5.9			885.5	Not Found	Peak Found	Not Found	Not Found	High	1
FALSE	High	Master Protein	Q14152	Eukaryotic translation initiation factor 3 subunit A OS=Homo sapiens OX=9606 GN=EIF3A PE=1 SV=1	0	44.922	11	15	30	15	1382	166.5	6.79	10971		15		0	0	2.218	2.52	1.953	1.328	0.887933	0.185212	0.359257	0.980254	44.25	30.91	86.4	67.93	132.7	126.9	91.3	45.6	87.6	High	High	High	Peak Found	High	1
FALSE	High	Master Protein	P46087	Probable 28S rRNA (cytosine(4447)-C(5))-methyltransferase OS=Homo sapiens OX=9606 GN=NOP2 PE=1 SV=2	0	44.857	17	12	16	12	812	89.2	9.23	7509		12		0	0	1.365	1.097	1.057	1.107	0.999286	0.986651	0.972863	0.982616	97.17	82.97	55.36	954.47	93.2	73.5	69	66.7	425.6	Peak Found	High	High	Peak Found	High	1
FALSE	High	Master Protein	P50416	Carnitine O-palmitoyltransferase 1, liver isoform OS=Homo sapiens OX=9606 GN=CPT1A PE=1 SV=2	0	44.832	21	14	59	14	773	88.3	8.65	18043		14		0	0	1.323	1.249	1.359	0.644	0.999286	0.951049	0.910422	0.984872	19.83	26.48	36.59	28.58	119.6	101.1	111.2	83.6	60.4	High	High	High	High	High	1
FALSE	High	Master Protein	Q14CX7	N-alpha-acetyltransferase 25, NatB auxiliary subunit OS=Homo sapiens OX=9606 GN=NAA25 PE=1 SV=1	0	44.536	14	13	62	13	972	112.2	6.64	24463		13		0	0	0.516	0.939	1.286	0.117	0.972405	0.985667	0.949586	0.737597	26.92	33.27	18.98	31.47	70.2	142.7	188.5	144.3	24	High	High	High	High	High	1
FALSE	High	Master Protein	P51692	Signal transducer and activator of transcription 5B OS=Homo sapiens OX=9606 GN=STAT5B PE=1 SV=2	0	44.425	16	11	13	11	787	89.8	6.05	6661		11		0	0		1.331		11.296		0.912086		0.571084		0		0	13.5	48.5	19.4	9.3	768.7	Peak Found	Peak Found	Peak Found	Peak Found	High	1
FALSE	High	Master Protein	Q5JTZ9	Alanine--tRNA ligase, mitochondrial OS=Homo sapiens OX=9606 GN=AARS2 PE=1 SV=1	0	44.382	14	11	25	11	985	107.3	6.27	9365		11		0	0	5.456	0.922	2.019	6.513	0.398273	0.975908	0.511607	0.708834	38.84	70.42	33.39	36.73	179	36.3	44	13.6	291.4	High	Peak Found	Peak Found	Peak Found	High	1
FALSE	High	Master Protein	P27797	Calreticulin OS=Homo sapiens OX=9606 GN=CALR PE=1 SV=1	0	44.275	34	11	60	11	417	48.1	4.44	21963		11		0	0	0.291	0.694	0.861	0.152	0.737415	0.73012	0.778996	0.784639	22.54	20.24	18.78	14.47	47.8	110.4	145.3	182.3	23.1	High	High	High	High	Peak Found	1
FALSE	High	Master Protein	P00338	L-lactate dehydrogenase A chain OS=Homo sapiens OX=9606 GN=LDHA PE=1 SV=2	0	44.195	34	11	58	10	332	36.7	8.27	28306		11		0	1	0.529	1.134	0.904	0.245	0.977307	0.986398	0.844447	0.870183	15.56	26.5	18.62	24.37	74.3	170	120.3	141.1	34.1	High	High	High	High	High	1
FALSE	High	Master Protein	P11717	Cation-independent mannose-6-phosphate receptor OS=Homo sapiens OX=9606 GN=IGF2R PE=1 SV=3	0	43.958	7	16	52	16	2491	274.2	5.94	17996		16		0	0	0.721	1.136	1.335	0.328	0.999286	0.986398	0.929222	0.927708	36.68	19.24	23.37	41.74	93.1	139.6	167.3	127.6	35	High	High	High	High	High	1
FALSE	High	Master Protein	E7EQI7	WASH complex subunit 5 OS=Homo sapiens OX=9606 GN=WASHC5 PE=1 SV=1	0	43.947	16	14	39	14	1011	117	8.27	12864		14		0	0	0.345	0.661	0.817	0.072	0.831893	0.65368	0.687505	0.626507	28.45	34.28	31.15	96.53	128.5	98.7	134	164.1	35.2	High	High	High	High	Peak Found	1
FALSE	High	Master Protein	P22102	Trifunctional purine biosynthetic protein adenosine-3 OS=Homo sapiens OX=9606 GN=GART PE=1 SV=1	0	43.743	13	12	26	12	1010	107.7	6.7	10887		12		0	0	3.591	4.34	4.693	3.743	0.629436	0.00914805	0.000779797	0.808581	74.62	39.91	50.07	24.34	123.4	156.7	149.4	26.3	156.5	High	High	High	High	High	1
FALSE	High	Master Protein	Q92888	Rho guanine nucleotide exchange factor 1 OS=Homo sapiens OX=9606 GN=ARHGEF1 PE=1 SV=2	0	43.562	13	11	13	11	912	102.4	5.66	5876		11		0	0	100	100	100	100	5.33141e-17	6.62708e-17	5.41217e-17	3.00121e-17					5	4.3	4.3		879.2	Peak Found	Peak Found	Peak Found	Not Found	High	1
FALSE	High	Master Protein	P08648	Integrin alpha-5 OS=Homo sapiens OX=9606 GN=ITGA5 PE=1 SV=2	0	43.239	12	10	60	10	1049	114.5	5.77	26795		10		0	0	0.569	0.945	1.03	0.324	0.980991	0.986398	0.959149	0.927415	16.85	14.65	36.71	37.64	87.5	134.1	140.5	146.5	48.2	High	High	High	High	High	1
FALSE	High	Master Protein	P68366	Tubulin alpha-4A chain OS=Homo sapiens OX=9606 GN=TUBA4A PE=1 SV=1	0	43.086	27	10	45	2	448	49.9	5.06	17083		10		0	0	0.47	0.414	0.72	0.804	0.916708	0.138531	0.544803	0.983379	139.72	0	0	96.5	113.6	40.3	70.3	133.6	160.4	High	Peak Found	High	High	High	1
FALSE	High	Master Protein	E9PHA2	Condensin complex subunit 2 OS=Homo sapiens OX=9606 GN=NCAPH PE=1 SV=1	0	42.572	22	12	12	12	730	81.5	5.06	5656		12		0	0	2.765	1.188	1.322	10.566	0.785038	0.984381	0.934843	0.587483	124.47	61.6	43.73	62.49	49.5	57.8	41.3	49.9	532.4	Peak Found	Peak Found	Peak Found	Peak Found	High	1
FALSE	High	Master Protein	P16144	Integrin beta-4 OS=Homo sapiens OX=9606 GN=ITGB4 PE=1 SV=5	0	42.366	8	12	52	12	1822	202	6.09	16184		12		0	0	1.71	1.345	1.421	0.237	0.972405	0.901011	0.862612	0.865092	27.47	28.73	52.7	19.95	135	104.3	101.5	78	17.3	High	High	High	High	High	1
FALSE	High	Master Protein	P19174	1-phosphatidylinositol 4,5-bisphosphate phosphodiesterase gamma-1 OS=Homo sapiens OX=9606 GN=PLCG1 PE=1 SV=1	0	42.121	10	11	31	10	1290	148.4	6.05	13262		11		0	0	4.269	2.514	1.458	0.44	0.523646	0.187183	0.827253	0.973909	15.88	15.44	23.81	76.94	143.6	82.7	44.7	40	19.3	High	High	Peak Found	Peak Found	Peak Found	1
FALSE	High	Master Protein	P30101	Protein disulfide-isomerase A3 OS=Homo sapiens OX=9606 GN=PDIA3 PE=1 SV=4	0	42.098	33	14	62	14	505	56.7	6.35	18517		14		0	0	0.442	0.607	0.876	0.228	0.922629	0.536958	0.803124	0.859662	37.38	18.86	33.97	27.02	71.6	87	169.9	144.1	34.8	High	High	High	High	High	1
FALSE	High	Master Protein	A0A499FIX8	Extended synaptotagmin-2 OS=Homo sapiens OX=9606 GN=ESYT2 PE=1 SV=1	0	42.056	15	12	12	11	845	93.9	8.21	5916		12		0	0	2.287	1.969	1.093	7.842	0.872556	0.438202	0.987625	0.661402	77.54	33.08	3.79	74.81	130.1	77.8	66.4	31.7	196	High	Peak Found	Peak Found	Peak Found	High	1
FALSE	High	Master Protein	Q9UKN8	General transcription factor 3C polypeptide 4 OS=Homo sapiens OX=9606 GN=GTF3C4 PE=1 SV=2	0	42.005	16	12	13	12	822	91.9	6.65	5962		12		0	0	1.595	2.271	2.05	10.035	0.962576	0.282179	0.489125	0.598094	30.4	47.92	29.76	42.11	73	73.9	57.8	31.5	561	Peak Found	Peak Found	Peak Found	Peak Found	High	1
FALSE	High	Master Protein	O14980	Exportin-1 OS=Homo sapiens OX=9606 GN=XPO1 PE=1 SV=1	0	41.7	13	14	22	14	1071	123.3	6.06	8644		14		0	0	5.469	3.938	3.457	11.865	0.397215	0.0171902	0.0194913	0.561258	26.14	6.12	44.3	14.82	152.4	109.1	67.6	16.2	327	High	High	Peak Found	Peak Found	High	1
FALSE	High	Master Protein	Q6P996	Pyridoxal-dependent decarboxylase domain-containing protein 1 OS=Homo sapiens OX=9606 GN=PDXDC1 PE=1 SV=2	0	41.551	19	13	15	13	788	86.7	5.38	6358		13		0	0	0.724	0.875	0.676	5.999	0.999286	0.948794	0.526511	0.72677	6.67	41.7	14.99	37.49	27.7	22.1	13.4	23.5	724.6	Peak Found	Peak Found	Peak Found	Peak Found	High	1
FALSE	High	Master Protein	Q6IA86	Elongator complex protein 2 OS=Homo sapiens OX=9606 GN=ELP2 PE=1 SV=2	0	41.357	15	11	12	11	826	92.4	5.96	5928		11		0	0	5.818	4.222	3.665	21.679	0.330016	0.0109802	0.0354932	0.406426	0	0	0	0	83.9	84.3	57.6	2.1	506	Peak Found	Peak Found	Peak Found	Peak Found	High	1
FALSE	High	Master Protein	P00558	Phosphoglycerate kinase 1 OS=Homo sapiens OX=9606 GN=PGK1 PE=1 SV=3	0	41.152	29	11	52	11	417	44.6	8.1	20504		11		0	0	0.316	0.839	0.949	0.161	0.791314	0.918034	0.898226	0.798961	24.43	26.33	35.41	36.74	59.2	118.8	142.8	164.9	23	High	High	High	High	High	1
FALSE	High	Master Protein	P20020	Plasma membrane calcium-transporting ATPase 1 OS=Homo sapiens OX=9606 GN=ATP2B1 PE=1 SV=4	0	40.866	14	14	40	7	1220	134.6	5.91	13425		14		0	7	1.029	1.246	1.207	0.508	0.999286	0.953011	0.985562	0.982359	40.01	23.47	61.23	25.12	108.8	128.6	90.2	106.9	58.3	High	High	High	High	High	1
FALSE	High	Master Protein	E7EWW0	VPS35 endosomal protein sorting factor-like OS=Homo sapiens OX=9606 GN=VPS35L PE=1 SV=2	0	40.817	13	13	29	13	1052	118.5	7.84	10045		13		0	0	100	100	100	100	5.33141e-17	6.62708e-17	5.41217e-17	3.00121e-17					154.4	109.4	75		194.9	High	High	Peak Found	Not Found	High	1
FALSE	High	Master Protein	Q7Z794	Keratin, type II cytoskeletal 1b OS=Homo sapiens OX=9606 GN=KRT77 PE=1 SV=3	0	40.755	11	11	55	3	578	61.9	5.99	26195		11		0	0	0.276	0.174	0.321	0.073	0.705386	0.00052058	0.00312048	0.630146	174.1	117.45	104.25	35.82	128.5	62.3	106.9	183.6	16.5	Peak Found	Peak Found	Peak Found	High	Peak Found	1
FALSE	High	Master Protein	P26358	DNA (cytosine-5)-methyltransferase 1 OS=Homo sapiens OX=9606 GN=DNMT1 PE=1 SV=2	0	40.69	8	13	44	13	1616	183.1	7.75	17336		13		0	0	0.382	0.934	1.083	0.059	0.872556	0.984381	0.987625	0.580033	12.98	21.67	12.38	26.48	63	164	163.2	179.4	7.1	High	High	High	High	Peak Found	1
FALSE	High	Master Protein	A0MZ66	Shootin-1 OS=Homo sapiens OX=9606 GN=SHTN1 PE=1 SV=4	0	40.65	21	11	11	11	631	71.6	5.33	5514		11		0	0			100	100			5.41217e-17	3.00121e-17							15.7		884.3	Not Found	Not Found	Peak Found	Not Found	High	1
FALSE	High	Master Protein	P46060	Ran GTPase-activating protein 1 OS=Homo sapiens OX=9606 GN=RANGAP1 PE=1 SV=1	0	40.616	22	12	12	12	587	63.5	4.68	5443		12		0	0	1.718	1.382	1.514	1.976	0.970576	0.879073	0.82488	0.927415	78.45	69.9	0	3.35	107.1	95.2	47.3	53	372.8	High	Peak Found	Peak Found	Peak Found	High	1
FALSE	High	Master Protein	Q99567	Nuclear pore complex protein Nup88 OS=Homo sapiens OX=9606 GN=NUP88 PE=1 SV=2	0	40.584	19	11	12	11	741	83.5	5.69	5658		11		0	0	0.828	1.151	0.188	2.568	0.999286	0.986398	1.6717e-05	0.875774	82.95	111.01	0	303.16	60.5	107.2	13.7	76.4	490.2	Peak Found	Peak Found	Peak Found	Peak Found	High	1
FALSE	High	Master Protein	Q01082	Spectrin beta chain, non-erythrocytic 1 OS=Homo sapiens OX=9606 GN=SPTBN1 PE=1 SV=2	0	40.407	7	14	35	14	2364	274.4	5.57	11294		14		0	0	0.195	0.981	0.717	0.01	0.49555	0.986398	0.476432	3.00121e-17	17.69	13.22	18.88		24	217.7	151	234.2		Peak Found	High	High	High	Not Found	1
FALSE	High	Master Protein	Q9H9G7	Protein argonaute-3 OS=Homo sapiens OX=9606 GN=AGO3 PE=1 SV=2	0	40.371	17	12	46	1	860	97.3	9.11	16961		12		0	0	0.766	0.653	0.674	0.306	0.999286	0.636784	0.515144	0.941302	0	0	0	0	113.9	97.2	100.2	148.7	45.6	Peak Found	High	Peak Found	High	Peak Found	1
FALSE	High	Master Protein	Q92626	Peroxidasin homolog OS=Homo sapiens OX=9606 GN=PXDN PE=1 SV=2	0	39.796	11	13	47	13	1479	165.2	7.17	17187		13		0	0	1.01	1.112	1.153	0.032	0.999286	0.986398	0.998113	0.427032	32.94	14.36	34.76	0	103.4	117.6	130.7	117.9	0.3	High	High	High	High	Peak Found	1
FALSE	High	Master Protein	Q9BXP5	Serrate RNA effector molecule homolog OS=Homo sapiens OX=9606 GN=SRRT PE=1 SV=1	0	39.751	11	11	27	11	876	100.6	5.96	11373		11		0	0	6.471	2.292	2.192	5.256	0.307688	0.271915	0.20902	0.745259	188.95	152.36	78.37	303.87	185.7	71.9	78.5	45.6	186.9	High	Peak Found	Peak Found	Peak Found	High	1
FALSE	High	Master Protein	V9GYM8	Guanine nucleotide exchange factor H1 OS=Homo sapiens OX=9606 GN=ARHGEF2 PE=1 SV=1	0	39.601	14	13	17	13	1031	116	7.37	7195		13		0	0	0.667	0.994	1.153	2.124	0.999286	0.986398	0.998113	0.914421	179.41	30.96	64.57	638.1	49.3	155.6	160.4	192.1	86.7	Peak Found	Peak Found	Peak Found	Peak Found	High	1
FALSE	High	Master Protein	Q32P44	Echinoderm microtubule-associated protein-like 3 OS=Homo sapiens OX=9606 GN=EML3 PE=1 SV=1	0	38.931	13	10	18	10	896	95.1	7.12	6850		10		0	0	2.719	2.895	2.288	5.061	0.795422	0.0975639	0.170593	0.74677	8.73	27.06	20.82	32.83	103.7	131.3	97.2	56.6	250.3	High	High	Peak Found	Peak Found	High	1
FALSE	High	Master Protein	Q13045	Protein flightless-1 homolog OS=Homo sapiens OX=9606 GN=FLII PE=1 SV=2	0	38.916	9	12	30	12	1269	144.7	6.05	11855		12		0	0	11.328	2.475	2.98	11.061	0.122674	0.199764	0.0357165	0.576596	142.71	98.68	93.87	133.83	75.4	88.6	108	93.6	74.3	High	Peak Found	Peak Found	Peak Found	High	1
FALSE	High	Master Protein	Q8NE71	ATP-binding cassette sub-family F member 1 OS=Homo sapiens OX=9606 GN=ABCF1 PE=1 SV=2	0	38.889	14	10	13	10	845	95.9	6.8	5692		10		0	0	1.183	1.961	1.682	0.805	0.999286	0.444104	0.672476	0.999525	54.71	41.13	25.73	275.54	71.9	101.4	86.5	54	343.1	Peak Found	Peak Found	Peak Found	Peak Found	High	1
FALSE	High	Master Protein	O14920	Inhibitor of nuclear factor kappa-B kinase subunit beta OS=Homo sapiens OX=9606 GN=IKBKB PE=1 SV=1	0	38.279	17	11	13	11	756	86.5	5.78	5586		11		0	0	100	100	100	100	5.33141e-17	6.62708e-17	5.41217e-17	3.00121e-17					51.4	33.2	9		782.3	Peak Found	Peak Found	Peak Found	Not Found	High	1
FALSE	High	Master Protein	Q86Y46	Keratin, type II cytoskeletal 73 OS=Homo sapiens OX=9606 GN=KRT73 PE=1 SV=1	0	37.674	14	10	45	3	540	58.9	7.23	19299		10		0	1	0.459	0.392	0.466	0.167	0.932665	0.10757	0.0538934	0.801017	22.18	15.69	27.92	42.57	65.3	62.1	76.4	141.7	76.5	High	High	High	High	High	1
FALSE	High	Master Protein	Q16658	Fascin OS=Homo sapiens OX=9606 GN=FSCN1 PE=1 SV=3	0	37.431	22	10	64	10	493	54.5	7.24	27681		10		0	0	0.486	0.782	1.464	0.261	0.962576	0.862357	0.82219	0.884158	20.01	16.29	17.7	14.68	67	126.1	182.8	160.5	19.6	High	High	High	High	High	1
FALSE	High	Master Protein	H3BQZ7	HCG2044799 OS=Homo sapiens OX=9606 GN=HNRNPUL2-BSCL2 PE=4 SV=1	0	37.349	14	10	11	10	746	84.6	4.93	6110		10		0	0	7.075	7.397	0.01	8.941	0.263206	0.000143914	5.41217e-17	0.627032	0	0		37.08	129.7	130.3		22.1	501.7	Peak Found	Peak Found	Not Found	Peak Found	High	1
FALSE	High	Master Protein	P13807	Glycogen [starch] synthase, muscle OS=Homo sapiens OX=9606 GN=GYS1 PE=1 SV=2	0	37.15	18	12	27	12	737	83.7	6.18	9557		12		0	0	4.386	3.051	2.841	4.746	0.50854	0.0755231	0.0478165	0.755603	28.53	65.28	7.5	31.47	133.4	92.3	81.5	16.2	190.6	High	High	Peak Found	Peak Found	High	1
FALSE	High	Master Protein	O14964	Hepatocyte growth factor-regulated tyrosine kinase substrate OS=Homo sapiens OX=9606 GN=HGS PE=1 SV=1	0	36.553	10	10	11	10	777	86.1	6.16	5830		10		0	0	0.981	1.277	1.133	3.16	0.999286	0.94499	0.991556	0.837231	12.69	19.6	28.22	25.62	41.1	49.7	46.9	43.8	595.7	Peak Found	Peak Found	Peak Found	Peak Found	High	1
FALSE	High	Master Protein	P42892	Endothelin-converting enzyme 1 OS=Homo sapiens OX=9606 GN=ECE1 PE=1 SV=2	0	36.511	13	10	55	10	770	87.1	5.88	23690		10		0	0	0.739	1.093	1.139	0.401	0.999286	0.98875	0.99817	0.964825	30.07	11.71	47.78	14.77	87.2	142.7	150.9	132.3	50.1	High	High	High	High	High	1
FALSE	High	Master Protein	Q93034	Cullin-5 OS=Homo sapiens OX=9606 GN=CUL5 PE=1 SV=4	0	36.268	17	13	45	13	780	90.9	7.94	16217		13		0	0	1.016	1.093	1.168	0.507	0.999286	0.98875	0.995196	0.982359	19.1	9.86	11.01	33.34	105.9	113.9	114	105.1	54.6	High	High	High	High	High	1
FALSE	High	Master Protein	Q9H269	Vacuolar protein sorting-associated protein 16 homolog OS=Homo sapiens OX=9606 GN=VPS16 PE=1 SV=2	0	35.821	13	10	42	10	839	94.6	6.77	17174		10		0	0	1.271	1	1.215	0.841	0.999286	0.986398	0.982514	0.999163	17.4	11.94	29.82	17.26	114.1	82.5	96.3	82	75.3	High	High	High	High	High	1
FALSE	High	Master Protein	Q13423	NAD(P) transhydrogenase, mitochondrial OS=Homo sapiens OX=9606 GN=NNT PE=1 SV=3	0	35.75	11	11	43	11	1086	113.8	8.09	16396		11		0	0	0.397	0.813	1.041	0.112	0.887933	0.89034	0.963775	0.734433	34.05	11.25	14.32	25.04	83.1	129.7	133.2	157.6	17.6	High	High	High	High	Peak Found	1
FALSE	High	Master Protein	Q12979	Active breakpoint cluster region-related protein OS=Homo sapiens OX=9606 GN=ABR PE=1 SV=2	0	35.641	15	12	35	12	859	97.5	6.55	13769		12		0	0	4.953	2.927	2.345	4.796	0.44477	0.0925426	0.149848	0.753347	13.58	45.63	24.61	32.45	126.1	89.4	53	31.8	165.8	High	High	Peak Found	Peak Found	High	1
FALSE	High	Master Protein	P15144	Aminopeptidase N OS=Homo sapiens OX=9606 GN=ANPEP PE=1 SV=4	0	35.451	13	12	46	12	967	109.5	5.48	16337		12		0	0	0.566	1.271	1.291	0.219	0.977769	0.948375	0.949586	0.851468	32.18	14.15	56.82	31.38	109.3	116.8	118.1	147.1	35	High	High	High	High	High	1
FALSE	High	Master Protein	Q96CW5	Gamma-tubulin complex component 3 OS=Homo sapiens OX=9606 GN=TUBGCP3 PE=1 SV=2	0	35.342	11	9	11	9	907	103.5	8.12	5413		9		0	0	1.063	2.118	1.442	14.936	0.999286	0.351679	0.894219	0.503168	284.36	171.46	109.29	0	97.4	124.5	90.9	82.8	288.5	Peak Found	Peak Found	High	Peak Found	High	1
FALSE	High	Master Protein	Q8IYB7	DIS3-like exonuclease 2 OS=Homo sapiens OX=9606 GN=DIS3L2 PE=1 SV=4	0	35.264	11	9	9	9	885	99.2	6.1	5092		9		0	0	1.436	1.152	0.697	4.634	0.977307	0.986398	0.515144	0.759767	77.06	90.42	0	42.14	73.8	73.4	68	26.1	528.6	Peak Found	Peak Found	Peak Found	Peak Found	High	1
FALSE	High	Master Protein	J3QTR3	Ubiquitin-40S ribosomal protein S27a (Fragment) OS=Homo sapiens OX=9606 GN=RPS27A PE=1 SV=1	0	35.147	52	7	71	7	106	12.2	10.14	30731		7		0	0	0.934	1.042	0.901	0.868	0.999286	0.997378	0.838772	0.996927	24.14	23.44	60.52	54.61	102.1	113.5	107.3	116.2	93.4	High	High	High	High	High	1
FALSE	High	Master Protein	P48200	Iron-responsive element-binding protein 2 OS=Homo sapiens OX=9606 GN=IREB2 PE=1 SV=4	0	35.147	10	9	23	9	963	105	7.05	10152		9		0	0	3.761	2.606	3.505	3.283	0.601536	0.160025	0.011111	0.828969	12.12	28.26	33.65	12.49	62.1	30.1	274.4	7.7	54.4	High	High	High	Peak Found	High	1
FALSE	High	Master Protein	Q9NRY4	Rho GTPase-activating protein 35 OS=Homo sapiens OX=9606 GN=ARHGAP35 PE=1 SV=3	0	35.137	9	12	38	12	1499	170.4	6.64	14711		12		0	0	1.249	0.972	1.146	0.051	0.999286	0.986398	0.99817	0.541921	22.49	37	27.41	0	123.6	90.6	113.8	105.9	0.5	High	High	High	High	Peak Found	1
FALSE	High	Master Protein	Q15323	Keratin, type I cuticular Ha1 OS=Homo sapiens OX=9606 GN=KRT31 PE=1 SV=3	0	34.68	21	10	26	4	416	47.2	4.88	13603		10		0	5	0.515	7.151	1.363	0.614	0.962576	0.000194502	0.938672	0.984872	36.74	37.73	0	38.81	53.2	422.7	8.1	35.8	48.7	Peak Found	High	Not Found	Peak Found	High	1
FALSE	High	Master Protein	P33176	Kinesin-1 heavy chain OS=Homo sapiens OX=9606 GN=KIF5B PE=1 SV=1	0	34.515	14	11	22	11	963	109.6	6.51	6883		11		0	0	3.395	3.031	3.053	3.876	0.667697	0.077939	0.103762	0.801017	62.17	76.89	0	64.57	153.5	106.2	48.7	8.3	151.3	High	High	High	Peak Found	High	1
FALSE	High	Master Protein	Q5JRX3	Presequence protease, mitochondrial OS=Homo sapiens OX=9606 GN=PITRM1 PE=1 SV=3	0	34.436	15	13	36	13	1037	117.3	6.92	11574		13		0	0	0.333	0.886	0.958	0.188	0.819957	0.950576	0.914531	0.819276	15.28	18.93	22.34	21.14	73.5	165.3	147.7	170.7	21.8	High	High	High	High	High	1
FALSE	High	Master Protein	K7EKE6	Lon protease homolog, mitochondrial OS=Homo sapiens OX=9606 GN=LONP1 PE=1 SV=1	0	34.316	14	11	19	11	845	95.1	6.27	8679		11		0	0	4.672	2.41	2.987	4.198	0.476572	0.223263	0.0353979	0.785969	77.46	22.18	69.57	65.73	154.2	114.3	106.5	57.8	163.7	High	Peak Found	Peak Found	Peak Found	High	1
FALSE	High	Master Protein	Q9BUJ2	Heterogeneous nuclear ribonucleoprotein U-like protein 1 OS=Homo sapiens OX=9606 GN=HNRNPUL1 PE=1 SV=2	0	34.254	12	9	13	8	856	95.7	6.92	6184		9		0	0	1.63	1.394	1.925	2.551	0.977307	0.873487	0.376896	0.876168	101.51	40.35	0	102.24	134	81	84.7	43.3	72.9	Peak Found	Peak Found	High	Peak Found	High	1
FALSE	High	Master Protein	P19013	Keratin, type II cytoskeletal 4 OS=Homo sapiens OX=9606 GN=KRT4 PE=1 SV=5	0	34.252	15	9	36	2	520	56.1	6.61	20324		9		0	0	100				5.33141e-17								431					High	Not Found	Not Found	Not Found	Not Found	1
FALSE	High	Master Protein	H0Y8P3	LIM and calponin homology domains-containing protein 1 (Fragment) OS=Homo sapiens OX=9606 GN=LIMCH1 PE=1 SV=1	0	34.007	11	9	11	9	917	103.4	6.54	4631		9		0	0	100			100	5.33141e-17			3.00121e-17					20.5				879.5	Peak Found	Not Found	Not Found	Not Found	High	1
FALSE	High	Master Protein	C9J406	MICOS complex subunit MIC60 OS=Homo sapiens OX=9606 GN=IMMT PE=1 SV=1	0	33.933	15	9	18	9	659	73.2	6.07	8302		9		0	0	0.893	1.386	1.373	1.829	0.999286	0.877803	0.898226	0.941302	16.25	15.44	41.88	12.54	56.9	134.7	121.9	95	146	High	High	Peak Found	Peak Found	High	1
FALSE	High	Master Protein	E9PDF6	Unconventional myosin-Ib OS=Homo sapiens OX=9606 GN=MYO1B PE=1 SV=1	0	33.902	13	13	45	11	1107	128.4	9.31	15590		13		0	1	0.907	0.886	1.087	0.18	0.999286	0.950576	0.987625	0.810082	26.13	12.72	20.53	29.26	111.8	103.5	138.9	106.4	29.8	High	High	High	High	Peak Found	1
FALSE	High	Master Protein	P81605	Dermcidin OS=Homo sapiens OX=9606 GN=DCD PE=1 SV=2	0	33.726	41	9	40	9	110	11.3	6.54	15942		9		0	0	0.281	0.467	0.351	0.242	0.71286	0.233371	0.00699841	0.866724	60.31	19.68	37.38	15.11	68.5	70.6	86.1	129.6	26.4	High	High	High	High	High	1
FALSE	High	Master Protein	F5GZ28	DNA ligase OS=Homo sapiens OX=9606 GN=LIG1 PE=1 SV=1	0	33.686	15	11	21	11	851	93.9	6.01	8545		11		0	0	5.636	1.345	1.132	0.224	0.378539	0.901011	0.99817	0.856037	244.34	20.13	22.83	139.29	167.3	95.8	77.9	58.1	15.3	High	High	Peak Found	Peak Found	Peak Found	1
FALSE	High	Master Protein	A0A494C1L5	Lipopolysaccharide-responsive and beige-like anchor protein OS=Homo sapiens OX=9606 GN=LRBA PE=1 SV=1	0	33.618	4	11	53	11	2852	317.6	5.57	18430		11		0	0	1.829	1.296	1.299	0.131	0.956623	0.936193	0.938772	0.752043	26.68	30.94	28.86	14.1	131.9	92.9	90.3	73.2	24.1	High	High	High	High	Peak Found	1
FALSE	High	Master Protein	Q5T4S7	E3 ubiquitin-protein ligase UBR4 OS=Homo sapiens OX=9606 GN=UBR4 PE=1 SV=1	0	33.449	2	11	40	11	5183	573.5	6.04	12146		11		0	0	1.632	0.836	1.181	0.133	0.977307	0.914507	0.990089	0.753347	20.59	40	14.66	47.27	115.2	110.2	95	115.6	17.3	High	High	High	High	Peak Found	1
FALSE	High	Master Protein	P11279	Lysosome-associated membrane glycoprotein 1 OS=Homo sapiens OX=9606 GN=LAMP1 PE=1 SV=3	0	33.294	16	7	47	7	417	44.9	8.75	27746		7		0	0	0.711	1.08	1.319	0.328	0.999286	0.995808	0.932017	0.927942	17.15	7.7	22.8	24.94	89.5	139.1	149.7	122.4	44.3	High	High	High	High	High	1
FALSE	High	Master Protein	Q99543	DnaJ homolog subfamily C member 2 OS=Homo sapiens OX=9606 GN=DNAJC2 PE=1 SV=4	0	32.722	22	10	16	10	621	72	8.7	5363		10		0	0	100	100	100	100	5.33141e-17	6.62708e-17	5.41217e-17	3.00121e-17					142.7	90.8	27.5		389.4	High	Peak Found	Peak Found	Not Found	High	1
FALSE	High	Master Protein	Q8N1N4	Keratin, type II cytoskeletal 78 OS=Homo sapiens OX=9606 GN=KRT78 PE=1 SV=2	0	32.329	13	9	39	4	520	56.8	6.02	18085		9		0	0	0.263	0.373	0.36	0.166	0.678122	0.0856047	0.00860859	0.801017	50.1	61.11	23.22	10.16	44.6	66	72.8	154.6	21.3	High	High	High	High	High	1
FALSE	High	Master Protein	Q9BUQ8	Probable ATP-dependent RNA helicase DDX23 OS=Homo sapiens OX=9606 GN=DDX23 PE=1 SV=3	0	32.166	13	10	12	10	820	95.5	9.55	5508		10		0	0	100	100	100	100	5.33141e-17	6.62708e-17	5.41217e-17	3.00121e-17					179.3	39.7	22.4		586.1	High	Peak Found	Peak Found	Not Found	High	1
FALSE	High	Master Protein	Q8IZH2	5'-3' exoribonuclease 1 OS=Homo sapiens OX=9606 GN=XRN1 PE=1 SV=1	0	31.733	6	10	40	10	1706	194	7.21	13917		10		0	0	0.905	0.888	1.056	0.139	0.999286	0.950576	0.972863	0.759847	18.13	13.01	14.97	51.03	111.2	94.9	113.1	123.7	14.7	High	High	High	High	Peak Found	1
FALSE	High	Master Protein	Q14533	Keratin, type II cuticular Hb1 OS=Homo sapiens OX=9606 GN=KRT81 PE=1 SV=3	0	31.448	17	9	25	8	505	54.9	5.47	11839		9		0	0	0.574	5.507	1.079	0.607	0.977769	0.00166681	0.987108	0.982616	68.09	25.31	41.22	50.41	23.6	465.5	47.4	48.4	65	Peak Found	High	High	High	High	1
FALSE	High	Master Protein	Q6UWE0	E3 ubiquitin-protein ligase LRSAM1 OS=Homo sapiens OX=9606 GN=LRSAM1 PE=1 SV=1	0	31.199	13	8	8	8	723	83.5	5.94	4315		8		0	0	1.139	1.146		22.044	0.999286	0.986398		0.404493	0	0		0	51.2	36.3	22.7	5.1	684.5	Peak Found	Peak Found	Peak Found	Peak Found	High	1
FALSE	High	Master Protein	Q5VIR6	Vacuolar protein sorting-associated protein 53 homolog OS=Homo sapiens OX=9606 GN=VPS53 PE=1 SV=2	0	30.921	9	8	8	8	832	94.3	6.7	4956		8		0	0	2.069	1.439	0.01	15.525	0.832321	0.857307	5.41217e-17	0.494369	0	0		0	65.1	34.4		9.7	769.3	Peak Found	Peak Found	Not Found	Peak Found	High	1
FALSE	High	Master Protein	O15397	Importin-8 OS=Homo sapiens OX=9606 GN=IPO8 PE=1 SV=2	0	30.914	10	9	47	8	1037	119.9	5.16	17087		9		0	0	1.392	1.466	1.33	0.208	0.997896	0.830853	0.92938	0.839296	10.38	6.61	8.76	10.08	125.7	117.4	108.2	87.8	9.8	High	High	High	High	High	1
FALSE	High	Master Protein	Q9BSJ2	Gamma-tubulin complex component 2 OS=Homo sapiens OX=9606 GN=TUBGCP2 PE=1 SV=2	0	30.684	17	12	12	12	902	102.5	6.84	4250		12		0	0	100	100	100	100	5.33141e-17	6.62708e-17	5.41217e-17	3.00121e-17					53.4	45	44.3		701.1	Peak Found	Peak Found	Peak Found	Not Found	High	1
FALSE	High	Master Protein	P49959	Double-strand break repair protein MRE11 OS=Homo sapiens OX=9606 GN=MRE11 PE=1 SV=3	0	30.226	15	9	10	9	708	80.5	5.9	4935		9		0	0		100		100		6.62708e-17		3.00121e-17						9			869.4	Not Found	Peak Found	Not Found	Not Found	High	1
FALSE	High	Master Protein	Q9HC35	Echinoderm microtubule-associated protein-like 4 OS=Homo sapiens OX=9606 GN=EML4 PE=1 SV=3	0	30.2	10	9	31	9	981	108.8	6.4	11966		9		0	0	1.253	1.389	1.409	0.981	0.999286	0.876153	0.876294	0.985783	26.17	17.61	39.83	25.33	108.3	139.2	109.5	99.3	95.2	High	High	High	High	High	1
FALSE	High	Master Protein	Q9H0D6	5'-3' exoribonuclease 2 OS=Homo sapiens OX=9606 GN=XRN2 PE=1 SV=1	0	29.998	11	9	9	9	950	108.5	7.47	4173		9		0	0	100	100		100	5.33141e-17	6.62708e-17		3.00121e-17					33.6	101.7			755.2	Peak Found	Peak Found	Not Found	Not Found	High	1
FALSE	High	Master Protein	Q9NQX3	Gephyrin OS=Homo sapiens OX=9606 GN=GPHN PE=1 SV=1	0	29.854	14	8	8	8	736	79.7	5.43	3889		8		0	0	100	100		100	5.33141e-17	6.62708e-17		3.00121e-17					14.4	36			804.5	Peak Found	Peak Found	Not Found	Not Found	High	1
FALSE	High	Master Protein	P07437	Tubulin beta chain OS=Homo sapiens OX=9606 GN=TUBB PE=1 SV=2	0	29.747	21	7	36	4	444	49.6	4.89	10924		7		0	0	0.28	0.234	0.25	0.694	0.712086	0.0050533	0.000268209	0.988989	75.76	117.7	13.39	81.29	64.4	83.1	140.8	193.7	199.2	High	High	Peak Found	High	High	1
FALSE	High	Master Protein	Q8NB90	ATPase family protein 2 homolog OS=Homo sapiens OX=9606 GN=SPATA5 PE=1 SV=3	0	29.611	12	9	9	9	893	97.8	5.66	3860		9		0	0	100	100	100	100	5.33141e-17	6.62708e-17	5.41217e-17	3.00121e-17					27.7	12.6	177.5		553.1	Peak Found	Peak Found	Peak Found	Not Found	High	1
FALSE	High	Master Protein	O00267	Transcription elongation factor SPT5 OS=Homo sapiens OX=9606 GN=SUPT5H PE=1 SV=1	0	29.568	9	7	7	7	1087	120.9	5.06	3471		7		0	0	100			100	5.33141e-17			3.00121e-17					18.4				881.6	Peak Found	Not Found	Not Found	Not Found	High	1
FALSE	High	Master Protein	Q6PD62	RNA polymerase-associated protein CTR9 homolog OS=Homo sapiens OX=9606 GN=CTR9 PE=1 SV=1	0	29.488	9	10	35	10	1173	133.4	6.77	9727		10		0	0	0.845	0.977	1.041	0.125	0.999286	0.986398	0.963775	0.745538	29.15	30.77	35.13	10.09	106.2	124.2	114.2	123	4.6	High	High	High	High	Peak Found	1
FALSE	High	Master Protein	Q14432	cGMP-inhibited 3',5'-cyclic phosphodiesterase A OS=Homo sapiens OX=9606 GN=PDE3A PE=1 SV=3	0	29.435	7	6	7	6	1141	124.9	6	3903		6		0	0	100			100	5.33141e-17			3.00121e-17					15.7				884.3	Peak Found	Not Found	Not Found	Not Found	High	1
FALSE	High	Master Protein	Q9UGP8	Translocation protein SEC63 homolog OS=Homo sapiens OX=9606 GN=SEC63 PE=1 SV=2	0	29.379	10	7	12	7	760	87.9	5.31	5572		7		0	0	6.488	6.473	4.761	10.352	0.307632	0.000459015	0.00806013	0.591657	79.42	0	0	112.11	138.8	80.4	56.2	9.2	284.2	High	High	Peak Found	Peak Found	High	1
FALSE	High	Master Protein	A0A0A0MRM9	Nucleolar and coiled-body phosphoprotein 1 (Fragment) OS=Homo sapiens OX=9606 GN=NOLC1 PE=1 SV=1	0	29.335	12	8	13	8	708	74.6	9.47	5843		8		0	0	0.342	1.719	1.258	2.065	0.827214	0.619994	0.961396	0.922222	0	110.07	0	525.5	39.1	117.5	131.6	95.6	298.9	High	High	Peak Found	Peak Found	High	1
FALSE	High	Master Protein	A0A140TA69	Keratin, type I cuticular Ha4 OS=Homo sapiens OX=9606 GN=KRT34 PE=3 SV=1	0	29.278	17	8	11	3	436	49.4	5.06	4804		8		0	0	100	100		100	5.33141e-17	6.62708e-17		3.00121e-17					13.1	701.8			112.7	Peak Found	High	Not Found	Not Found	Peak Found	1
FALSE	High	Master Protein	Q9NRL3	Striatin-4 OS=Homo sapiens OX=9606 GN=STRN4 PE=1 SV=2	0	29.256	15	9	9	6	753	80.5	5.4	4385		9		0	0	100			100	5.33141e-17			3.00121e-17					13.1				886.9	Peak Found	Not Found	Not Found	Not Found	High	1
FALSE	High	Master Protein	P04075	Fructose-bisphosphate aldolase A OS=Homo sapiens OX=9606 GN=ALDOA PE=1 SV=2	0	29.222	32	10	23	10	364	39.4	8.09	7620		10		0	0	0.223	0.519	0.476	0.089	0.573203	0.336722	0.0609607	0.679647	19.45	24.83	11.89	47.27	54.8	110.8	105.6	260.2	10.3	High	High	Peak Found	High	Peak Found	1
FALSE	High	Master Protein	Q8N1G2	Cap-specific mRNA (nucleoside-2'-O-)-methyltransferase 1 OS=Homo sapiens OX=9606 GN=CMTR1 PE=1 SV=1	0	29.197	10	8	24	7	835	95.3	7.05	10510		8		0	1	1.884	1.603	1.664	2.632	0.939711	0.729723	0.617991	0.870183	25.92	25.65	10.21	25.87	108.7	95.6	96.7	67.5	141.6	High	High	High	High	High	1
FALSE	High	Master Protein	Q9Y4C2	TRPM8 channel-associated factor 1 OS=Homo sapiens OX=9606 GN=TCAF1 PE=1 SV=3	0	29.01	11	10	31	10	921	102.1	6.54	10597		10		0	0	1.085	0.79	1.181	0.925	0.999286	0.864654	0.990089	0.989021	22.3	49.03	36.15	19.39	63.8	102.3	140.3	183	40	High	High	High	High	High	1
FALSE	High	Master Protein	Q5D862	Filaggrin-2 OS=Homo sapiens OX=9606 GN=FLG2 PE=1 SV=1	0	28.981	8	9	16	9	2391	247.9	8.31	4188		9		0	0	0.115	0.158	0.13	0.095	0.248191	0.0002223	4.60379e-08	0.695772	72.61	51.81	77.62	115.74	29	42.9	26.1	281.7	23.2	Peak Found	Peak Found	Peak Found	High	High	1
FALSE	High	Master Protein	O15427	Monocarboxylate transporter 4 OS=Homo sapiens OX=9606 GN=SLC16A3 PE=1 SV=1	0	28.971	18	7	34	7	465	49.4	7.96	15248		7		0	0	1.074	1.556	1.513	0.754	0.999286	0.76933	0.776527	0.999163	33.31	39.81	30.46	120.62	102.7	135.1	127.3	96.3	73.7	High	High	High	High	High	1
FALSE	High	Master Protein	Q9Y6D9	Mitotic spindle assembly checkpoint protein MAD1 OS=Homo sapiens OX=9606 GN=MAD1L1 PE=1 SV=2	0	28.349	14	8	9	8	718	83	5.92	4085		8		0	0	100	100	100	100	5.33141e-17	6.62708e-17	5.41217e-17	3.00121e-17					34.3	62.9	10.4		784.8	Peak Found	Peak Found	Peak Found	Not Found	High	1
FALSE	High	Master Protein	A0A5F9ZHM4	L-lactate dehydrogenase OS=Homo sapiens OX=9606 GN=LDHB PE=1 SV=1	0	28.266	28	9	39	8	341	37.4	6.25	16158		9		0	0	0.67	1.406	1.244	0.569	0.999286	0.864654	0.968786	0.982616	42.62	18.37	46.44	35.16	87.3	158.9	136.2	114.3	59.4	High	High	High	High	High	1
FALSE	High	Master Protein	Q13033-2	Isoform Alpha of Striatin-3 OS=Homo sapiens OX=9606 GN=STRN3	0	28.229	15	9	10	6	713	77.7	5.26	4616		9		0	3			100	100			5.41217e-17	3.00121e-17							51		716.3	Not Found	Not Found	Not Found	Not Found	High	1
FALSE	High	Master Protein	Q9Y4G6	Talin-2 OS=Homo sapiens OX=9606 GN=TLN2 PE=1 SV=4	0	27.949	3	7	33	1	2542	271.4	5.57	12389		7		0	0	2.75	1.119	1.769	3.59	0.79232	0.986398	0.517774	0.810082	0	0	0	0	144.4	58.8	92.9	52.5	188.5	Peak Found	Peak Found	High	Peak Found	Peak Found	1
FALSE	High	Master Protein	M0R2N5	Very-long-chain enoyl-CoA reductase OS=Homo sapiens OX=9606 GN=TECR PE=1 SV=1	0	27.873	19	8	41	8	346	39.9	9.61	19071		8		0	0	0.885	1.133	1.21	0.431	0.999286	0.986398	0.983536	0.971083	22.37	12.46	17.57	23.64	95.1	121.9	140.1	114.2	55.4	High	High	High	High	High	1
FALSE	High	Master Protein	P06744	Glucose-6-phosphate isomerase OS=Homo sapiens OX=9606 GN=GPI PE=1 SV=4	0	27.813	16	7	34	7	558	63.1	8.32	10936		7		0	0	0.202	0.683	0.802	0.11	0.510318	0.704327	0.653887	0.729124	59.14	3.43	42.36	29.21	37.1	123.2	122.6	188	14.1	High	High	High	High	Peak Found	1
FALSE	High	Master Protein	B1AHC9	ATP-dependent DNA helicase 2 subunit 1 OS=Homo sapiens OX=9606 GN=XRCC6 PE=1 SV=1	0	27.796	21	9	39	9	559	64.2	9.28	12171		9		0	0	0.462	0.849	1.073	0.239	0.936689	0.931103	0.983403	0.865254	9.87	15.13	22.01	21.79	68.4	117.7	139.7	155.9	39.3	High	High	High	High	Peak Found	1
FALSE	High	Master Protein	P68371	Tubulin beta-4B chain OS=Homo sapiens OX=9606 GN=TUBB4B PE=1 SV=1	0	27.556	18	7	30	4	445	49.8	4.89	9523		7		0	4	0.541	0.508	0.718	1.065	0.977307	0.311014	0.479614	0.982616	75.52	82.88	33.01	94.58	88.6	102.9	83.1	183.5	163.7	Peak Found	Peak Found	Peak Found	High	High	1
FALSE	High	Master Protein	Q8N163	Cell cycle and apoptosis regulator protein 2 OS=Homo sapiens OX=9606 GN=CCAR2 PE=1 SV=2	0	27.131	7	7	7	7	923	102.8	5.22	4172		7		0	0				100				3.00121e-17									878.8	Not Found	Not Found	Not Found	Not Found	High	1
FALSE	High	Master Protein	Q8WX93	Palladin OS=Homo sapiens OX=9606 GN=PALLD PE=1 SV=3	0	27.056	7	8	9	8	1383	150.5	7.09	3816		8		0	0	0.01	0.753	0.895	1.146	5.33141e-17	0.826764	0.812906	0.982616		0	0	0		50.8	144.9	43.3	560.2	Not Found	Peak Found	Peak Found	Peak Found	High	1
FALSE	High	Master Protein	Q9Y4R8	Telomere length regulation protein TEL2 homolog OS=Homo sapiens OX=9606 GN=TELO2 PE=1 SV=2	0	27	10	8	10	8	837	91.7	5.76	4760		8		0	0	1.282	1.222	1.181	3.351	0.999286	0.966518	0.990089	0.823339	36.66	24.73	0	165.4	90.2	92.6	105.8	72.7	211.8	High	High	Peak Found	Peak Found	High	1
FALSE	High	Master Protein	Q8TD16	Protein bicaudal D homolog 2 OS=Homo sapiens OX=9606 GN=BICD2 PE=1 SV=1	0	26.839	10	7	7	7	824	93.5	5.44	3411		7		0	0		100		100		6.62708e-17		3.00121e-17						317.9			569.3	Not Found	Peak Found	Not Found	Not Found	High	1
FALSE	High	Master Protein	K7EKI8	Periplakin OS=Homo sapiens OX=9606 GN=PPL PE=1 SV=1	0	26.684	5	8	32	8	1754	204.4	5.62	12933		8		0	0	0.916	0.503	1.015	0.106	0.999286	0.301023	0.951722	0.723844	29.26	14.14	7.54	8.3	104.7	75.1	130.8	144.2	11.7	High	High	High	High	Peak Found	1
FALSE	High	Master Protein	A0A087WSZ7	Phosphodiesterase OS=Homo sapiens OX=9606 GN=PDE4D PE=1 SV=1	0	26.524	12	8	9	8	678	77	4.97	4141		8		0	0		100	100	100		6.62708e-17	5.41217e-17	3.00121e-17						20.8	5.8		856.5	Not Found	Peak Found	Peak Found	Not Found	High	1
FALSE	High	Master Protein	Q9Y4L1	Hypoxia up-regulated protein 1 OS=Homo sapiens OX=9606 GN=HYOU1 PE=1 SV=1	0	26.235	13	10	21	10	999	111.3	5.22	6627		10		0	0	3.551	6.463	2.874	4.244	0.636493	0.000464094	0.0442782	0.783987	71.13	71.84	56.56	79.55	111.6	187.2	155.5	88.5	79.4	High	High	Peak Found	Peak Found	High	1
FALSE	High	Master Protein	P08729	Keratin, type II cytoskeletal 7 OS=Homo sapiens OX=9606 GN=KRT7 PE=1 SV=5	0	26.12	10	6	29	2	469	51.4	5.48	14832		6		0	0	0.243	0.616	0.283	0.079	0.625141	0.557655	0.000951093	0.650523	57.35	45.53	15.38	33.52	44.2	109.9	49.5	173.2	13.9	High	Peak Found	High	High	High	1
FALSE	High	Master Protein	Q8IVL6	Prolyl 3-hydroxylase 3 OS=Homo sapiens OX=9606 GN=P3H3 PE=1 SV=1	0	26.048	15	9	12	9	736	81.8	6.32	4061		9		0	0	13.533	12.686	8.934	33.852	0.0753911	4.97966e-07	3.57078e-05	0.304864	0	0	0	0	114.2	97.9	56.7	2.1	340.9	High	Peak Found	Peak Found	Peak Found	High	1
FALSE	High	Master Protein	P57740	Nuclear pore complex protein Nup107 OS=Homo sapiens OX=9606 GN=NUP107 PE=1 SV=1	0	26.004	6	6	6	6	925	106.3	5.43	3465		6		0	0	2.48	1.739	3.192	8.273	0.622162	0.605846	0.146036	0.64644	0	0	0	0	74.4	85	64.5	12.7	550.2	Peak Found	Peak Found	Peak Found	Peak Found	High	1
FALSE	High	Master Protein	C9J2Y9	DNA-directed RNA polymerase subunit beta OS=Homo sapiens OX=9606 GN=POLR2B PE=1 SV=2	0	25.988	9	9	27	9	1167	133	7.15	8425		9		0	0	0.852	0.825	1.129	0.18	0.999286	0.901011	0.998113	0.811404	8.31	30.94	13.7	53.94	102.8	97.1	117	128.2	17	High	High	High	High	Peak Found	1
FALSE	High	Master Protein	P15586	N-acetylglucosamine-6-sulfatase OS=Homo sapiens OX=9606 GN=GNS PE=1 SV=3	0	25.942	18	9	32	9	552	62	8.31	10983		9		0	0	0.923	1.357	1.319	0.555	0.999286	0.895956	0.932017	0.982616	20.71	16.39	15.02	31.77	91.9	139.9	135.3	97	62.6	High	High	High	High	High	1
FALSE	High	Master Protein	Q8WWM7	Ataxin-2-like protein OS=Homo sapiens OX=9606 GN=ATXN2L PE=1 SV=2	0	25.662	11	9	9	9	1075	113.3	8.59	3549		9		0	0	0.945	0.913	0.698	1.994	0.999286	0.968015	0.502859	0.927415	12.79	14.6	0	47.62	60.5	56.1	32.6	64.1	471.1	Peak Found	Peak Found	Peak Found	Peak Found	High	1
FALSE	High	Master Protein	Q9NZT2	Opioid growth factor receptor OS=Homo sapiens OX=9606 GN=OGFR PE=1 SV=3	0	25.654	23	9	9	9	677	73.3	4.84	2845		9		0	0				100				3.00121e-17									875.7	Not Found	Not Found	Not Found	Not Found	High	1
FALSE	High	Master Protein	Q96T51	RUN and FYVE domain-containing protein 1 OS=Homo sapiens OX=9606 GN=RUFY1 PE=1 SV=2	0	25.541	10	6	6	5	708	79.8	5.74	3260		6		0	1		100	100	100		6.62708e-17	5.41217e-17	3.00121e-17						26.3	45.4		778.9	Not Found	Peak Found	Peak Found	Not Found	High	1
FALSE	High	Master Protein	Q9UKG1	DCC-interacting protein 13-alpha OS=Homo sapiens OX=9606 GN=APPL1 PE=1 SV=1	0	25.461	12	6	6	6	709	79.6	5.41	3022		6		0	0	0.01		0.01	3.356	5.33141e-17		5.41217e-17	0.823339				0		31.7		52.6	776.2	Not Found	Peak Found	Not Found	Peak Found	High	1
FALSE	High	Master Protein	Q9NW13	RNA-binding protein 28 OS=Homo sapiens OX=9606 GN=RBM28 PE=1 SV=3	0	25.14	12	8	9	8	759	85.7	9.22	3393		8		0	0	100	100		100	5.33141e-17	6.62708e-17		3.00121e-17					36.8	25.6			782.4	Peak Found	Peak Found	Not Found	Not Found	High	1
FALSE	High	Master Protein	Q96SU4	Oxysterol-binding protein-related protein 9 OS=Homo sapiens OX=9606 GN=OSBPL9 PE=1 SV=2	0	25.098	11	7	9	7	736	83.1	6.18	4459		7		0	0		100		100		6.62708e-17		3.00121e-17						23.5			876.5	Not Found	Peak Found	Not Found	Not Found	High	1
FALSE	High	Master Protein	P02545	Prelamin-A/C OS=Homo sapiens OX=9606 GN=LMNA PE=1 SV=1	0	25.05	12	8	10	8	664	74.1	7.02	3625		8		0	0	0.187	0.224	1.318	0.089	0.474661	0.0036735	0.932017	0.679647	77.67	110.35	0	250.45	58.6	120.9	159.1	263.5	20.2	High	High	Peak Found	High	Peak Found	1
FALSE	High	Master Protein	Q15020	Squamous cell carcinoma antigen recognized by T-cells 3 OS=Homo sapiens OX=9606 GN=SART3 PE=1 SV=1	0	24.989	9	8	9	8	963	109.9	5.57	3592		8		0	0	1.349	1.448	2.539	6.226	0.999286	0.847426	0.225475	0.722881	61.64	84.7	19.47	109.17	92.1	67.5	53.8	63.9	389.6	Peak Found	Peak Found	Peak Found	Peak Found	High	1
FALSE	High	Master Protein	P15311	Ezrin OS=Homo sapiens OX=9606 GN=EZR PE=1 SV=4	0	24.914	9	7	34	1	586	69.4	6.27	15995		7		0	0	0.389	0.613	0.01	0.01	0.831179	0.549191	5.41217e-17	3.00121e-17	0	0			123.5	194.4		317.3		Peak Found	Peak Found	Not Found	High	Not Found	1
FALSE	High	Master Protein	A0A0A0MQU1	Inverted formin-2 (Fragment) OS=Homo sapiens OX=9606 GN=INF2 PE=1 SV=1	0	24.871	11	7	7	7	717	78.8	5.58	3624		7		0	0	100	100		100	5.33141e-17	6.62708e-17		3.00121e-17					22.2	42.1			762.7	Peak Found	Peak Found	Not Found	Not Found	High	1
FALSE	High	Master Protein	Q9UBV2	Protein sel-1 homolog 1 OS=Homo sapiens OX=9606 GN=SEL1L PE=1 SV=3	0	24.653	13	7	13	7	794	88.7	5.39	3719		7		0	0	2.211	2.619	3.266	7.815	0.832081	0.156152	0.0423095	0.661402	27.57	11.98	22.99	9.6	65.8	87.2	92.7	35.2	409.6	High	High	Peak Found	Peak Found	High	1
FALSE	High	Master Protein	Q15075	Early endosome antigen 1 OS=Homo sapiens OX=9606 GN=EEA1 PE=1 SV=2	0	24.604	6	9	22	9	1411	162.4	5.68	7713		9		0	0	0.24	0.923	0.939	0.062	0.622899	0.976437	0.88991	0.590018	15.7	12.98	11.72	98.56	46.7	177.7	188.2	202.5	5.5	Peak Found	High	High	High	Peak Found	1
FALSE	High	Master Protein	O75175	CCR4-NOT transcription complex subunit 3 OS=Homo sapiens OX=9606 GN=CNOT3 PE=1 SV=1	0	24.459	11	7	8	7	753	81.8	6.2	4071		7		0	0				100				3.00121e-17									900	Not Found	Not Found	Not Found	Not Found	High	1
FALSE	High	Master Protein	P10809	60 kDa heat shock protein, mitochondrial OS=Homo sapiens OX=9606 GN=HSPD1 PE=1 SV=2	0	24.394	20	9	34	9	573	61	5.87	8722		9		0	0	0.516	0.811	1.378	0.438	0.972405	0.889802	0.897124	0.971083	27.34	35.74	23.23	52.06	88.1	122.2	175.4	140.2	75.1	High	High	High	High	High	1
FALSE	High	Master Protein	E7ENY0	Alpha-adducin OS=Homo sapiens OX=9606 GN=ADD1 PE=1 SV=1	0	24.378	14	6	6	6	663	73.4	6.55	3002		6		0	0		2.254	0.01	22.738		0.284816	5.41217e-17	0.398475		0		0	14.3	27.2		12.1	821.1	Peak Found	Peak Found	Not Found	Peak Found	High	1
FALSE	High	Master Protein	Q13144	Translation initiation factor eIF-2B subunit epsilon OS=Homo sapiens OX=9606 GN=EIF2B5 PE=1 SV=3	0	24.214	9	6	7	6	721	80.3	5.08	3734		6		0	0	100	100	100	100	5.33141e-17	6.62708e-17	5.41217e-17	3.00121e-17					40.1	34.4	366		310.5	Peak Found	Peak Found	Peak Found	Not Found	High	1
FALSE	High	Master Protein	Q9Y6W3	Calpain-7 OS=Homo sapiens OX=9606 GN=CAPN7 PE=1 SV=1	0	24.196	10	8	9	8	813	92.6	7.65	3686		8		0	0	3.786	3.252	2.678	8.538	0.447385	0.0537843	0.0694665	0.637184	0	0	0	0	49.7	86.3	264.3	3.9	279.4	High	Peak Found	Peak Found	Peak Found	High	1
FALSE	High	Master Protein	P05141	ADP/ATP translocase 2 OS=Homo sapiens OX=9606 GN=SLC25A5 PE=1 SV=7	0	24.113	24	8	35	1	298	32.8	9.69	14644		8		0	7	1.042	1.408	0.947	0.647	0.999286	0.862484	0.898226	0.984872	12.31	15.17	10.88	23.74	107.7	143.4	118.2	98	63.7	Peak Found	High	Peak Found	Peak Found	Peak Found	1
FALSE	High	Master Protein	P13798	Acylamino-acid-releasing enzyme OS=Homo sapiens OX=9606 GN=APEH PE=1 SV=4	0	24.02	14	8	22	8	732	81.2	5.48	6478		8		0	0	0.877	0.813	0.999	0.42	0.999286	0.89034	0.936868	0.967545	12.13	44.43	42.33	33.02	104.8	99.2	120.2	123.8	41	High	High	High	High	High	1
FALSE	High	Master Protein	P17301	Integrin alpha-2 OS=Homo sapiens OX=9606 GN=ITGA2 PE=1 SV=1	0	24.007	7	9	28	9	1181	129.2	5.31	10069		9		0	0	0.726	0.976	1.256	0.419	0.999286	0.986398	0.962067	0.967545	3.31	3.79	11.13	8.43	97.6	137.8	151.6	133.5	59.1	High	High	High	High	High	1
FALSE	High	Master Protein	P11166	Solute carrier family 2, facilitated glucose transporter member 1 OS=Homo sapiens OX=9606 GN=SLC2A1 PE=1 SV=2	0	23.889	13	6	22	6	492	54	8.72	11748		6		0	0	0.918	1.034	1.057	0.601	0.999286	0.996923	0.972863	0.982616	34.12	39.51	75.41	85.57	113.9	111.3	128	110.1	60.1	High	High	High	High	High	1
FALSE	High	Master Protein	P12236	ADP/ATP translocase 3 OS=Homo sapiens OX=9606 GN=SLC25A6 PE=1 SV=4	0	23.745	26	8	38	1	298	32.8	9.74	14827		8		0	0	0.702	0.61	0.709	0.342	0.999286	0.544121	0.619447	0.967482	0	0	0	0	109.1	94.7	110.2	155.4	53.1	High	Peak Found	Peak Found	High	High	1
FALSE	High	Master Protein	Q6PGP7	Tetratricopeptide repeat protein 37 OS=Homo sapiens OX=9606 GN=TTC37 PE=1 SV=1	0	23.726	5	8	20	8	1564	175.4	7.53	6579		8		0	0	0.317	0.849	1.04	0.173	0.791881	0.930959	0.963611	0.808581	38.42	6	13.26	65.02	70.2	157.4	183.1	146.7	14.4	High	High	High	High	Peak Found	1
FALSE	High	Master Protein	F5H2T0	IkappaB kinase complex-associated protein OS=Homo sapiens OX=9606 GN=ELP1 PE=1 SV=1	0	23.657	12	9	25	9	983	111.4	6.28	6403		9		0	0	5.406	1.91	1.821	0.606	0.402231	0.476246	0.483439	0.999054	25.74	60.49	39.93	34.96	151	83	46.5	44.3	15.7	High	High	High	Peak Found	Peak Found	1
FALSE	High	Master Protein	P23634	Plasma membrane calcium-transporting ATPase 4 OS=Homo sapiens OX=9606 GN=ATP2B4 PE=1 SV=2	0	23.59	8	8	19	1	1241	137.8	6.6	6390		8		0	0	0.788	0.777	0.01	0.45	0.999286	0.858154	5.41217e-17	0.987652	0	0		0	111.2	109.6		141.1	63.4	Peak Found	Peak Found	Not Found	Peak Found	Peak Found	1
FALSE	High	Master Protein	H0YKT5	Transducin-like enhancer protein 3 OS=Homo sapiens OX=9606 GN=TLE3 PE=1 SV=1	0	23.524	13	7	8	7	774	83.5	7.17	3191		7		0	0				100				3.00121e-17									900	Not Found	Not Found	Not Found	Not Found	High	1
FALSE	High	Master Protein	A0A3B3IUB5	Minor histocompatibility antigen H13 OS=Homo sapiens OX=9606 GN=HM13 PE=1 SV=1	0	23.429	21	7	36	7	420	46.3	8.03	13029		7		0	0	0.827	1.11	0.949	0.382	0.999286	0.986398	0.898226	0.956927	15	26.9	50.75	21.25	92.6	150.4	100.6	125.9	46	High	High	High	High	High	1
FALSE	High	Master Protein	Q969S9	Ribosome-releasing factor 2, mitochondrial OS=Homo sapiens OX=9606 GN=GFM2 PE=1 SV=1	0	23.414	12	8	8	8	779	86.5	6.51	2886		8		0	0	100	100		100	5.33141e-17	6.62708e-17		3.00121e-17					113.2	17			645.7	Peak Found	Peak Found	Not Found	Not Found	High	1
FALSE	High	Master Protein	Q709C8	Vacuolar protein sorting-associated protein 13C OS=Homo sapiens OX=9606 GN=VPS13C PE=1 SV=1	0	23.216	3	9	21	9	3753	422.1	6.83	6535		9		0	0	2.499	1.149	1.288	0.01	0.832654	0.986398	0.949586	3.00121e-17	36.85	29.86	24.92		162.7	60.6	58.4	67.7		High	High	Peak Found	Peak Found	Not Found	1
FALSE	High	Master Protein	Q5W0V3	Protein FAM160B1 OS=Homo sapiens OX=9606 GN=FAM160B1 PE=1 SV=1	0	23.154	10	7	9	7	765	86.5	5.29	3848		7		0	0				100				3.00121e-17									900	Not Found	Not Found	Not Found	Not Found	High	1
FALSE	High	Master Protein	P11388	DNA topoisomerase 2-alpha OS=Homo sapiens OX=9606 GN=TOP2A PE=1 SV=3	0	23.097	5	8	23	8	1531	174.3	8.72	8607		8		0	0	0.444	0.931	0.993	0.139	0.922629	0.983268	0.932939	0.759847	48.44	17.85	31.54	18.99	77.4	153.4	128.3	167.3	30	High	High	High	High	Peak Found	1
FALSE	High	Master Protein	P52701	DNA mismatch repair protein Msh6 OS=Homo sapiens OX=9606 GN=MSH6 PE=1 SV=2	0	23.064	6	8	26	8	1360	152.7	6.9	9693		8		0	0	7.329	4.768	4.46	2.376	0.261801	0.00485629	0.00305802	0.766289	0	0	0	0	176.6	121.7	96.4	5.2	28.5	High	High	High	Peak Found	Peak Found	1
FALSE	High	Master Protein	O94874	E3 UFM1-protein ligase 1 OS=Homo sapiens OX=9606 GN=UFL1 PE=1 SV=2	0	23.004	9	7	7	7	794	89.5	6.79	3735		7		0	0	2.854	4.812	2.57	14.618	0.555673	0.00455288	0.301307	0.507073	50.88	8.52	42.52	72.76	43.9	116.1	59.5	20.1	569.2	Peak Found	Peak Found	Peak Found	Peak Found	High	1
FALSE	High	Master Protein	Q96T88	E3 ubiquitin-protein ligase UHRF1 OS=Homo sapiens OX=9606 GN=UHRF1 PE=1 SV=1	0	22.977	10	7	7	7	793	89.8	7.56	3047		7		0	0			100	100			5.41217e-17	3.00121e-17							37.1		840.3	Not Found	Not Found	Peak Found	Not Found	High	1
FALSE	High	Master Protein	E7ESC6	Exportin-7 OS=Homo sapiens OX=9606 GN=XPO7 PE=1 SV=1	0	22.877	9	8	8	8	1088	124	6.48	3079		8		0	0	2.179			1.992	0.832631			0.927415	0			0	168.2	50.8	97.1	11.6	354.4	Peak Found	Peak Found	Peak Found	Peak Found	High	1
FALSE	High	Master Protein	P52735-2	Isoform 2 of Guanine nucleotide exchange factor VAV2 OS=Homo sapiens OX=9606 GN=VAV2	0	22.742	8	7	13	7	868	100	6.9	5054		7		0	0	6.533	2.496	2.713	6.339	0.307632	0.19211	0.244578	0.71705	0	0	0	0	166.2	70.1	33.5	5	251.5	High	Peak Found	Peak Found	Peak Found	High	1
FALSE	High	Master Protein	Q86XP3	ATP-dependent RNA helicase DDX42 OS=Homo sapiens OX=9606 GN=DDX42 PE=1 SV=1	0	22.712	9	7	7	7	938	102.9	7.02	2994		7		0	0	1.554	1.712	1.835	18.833	0.903614	0.629497	0.718821	0.441917	0	0	0	0	16.9	18.6	20	10.9	802.2	Peak Found	Peak Found	Peak Found	Peak Found	High	1
FALSE	High	Master Protein	P05089	Arginase-1 OS=Homo sapiens OX=9606 GN=ARG1 PE=1 SV=2	0	22.663	15	6	17	6	322	34.7	7.21	6768		6		0	0	0.277	0.355	0.402	0.149	0.705386	0.0661962	0.0200837	0.776713	47.86	39.54	54.37	2.57	48.2	61.6	55.2	178.9	21.8	High	High	Peak Found	High	Peak Found	1
FALSE	High	Master Protein	Q9NZ08	Endoplasmic reticulum aminopeptidase 1 OS=Homo sapiens OX=9606 GN=ERAP1 PE=1 SV=3	0	22.507	7	7	12	6	941	107.2	6.46	4895		7		0	1	2.114	1.311	1.702	2.243	0.903614	0.929178	0.58077	0.905305	12.94	7.46	37.77	12.19	136.5	71.2	153.6	77.9	150.8	High	High	Peak Found	Peak Found	High	1
FALSE	High	Master Protein	P35573	Glycogen debranching enzyme OS=Homo sapiens OX=9606 GN=AGL PE=1 SV=3	0	22.494	5	7	25	7	1532	174.7	6.76	8636		7		0	0	0.218	0.875	0.81	0.062	0.559353	0.948794	0.672476	0.590792	14.76	13.4	13.99	3.77	43.6	172.3	189.4	202.1	3.3	Peak Found	High	High	High	Peak Found	1
FALSE	High	Master Protein	Q9Y6Y8	SEC23-interacting protein OS=Homo sapiens OX=9606 GN=SEC23IP PE=1 SV=1	0	22.36	6	6	6	6	1000	111	5.54	3113		6		0	0	100	100	100	100	5.33141e-17	6.62708e-17	5.41217e-17	3.00121e-17					52.9	70	38.3		710.7	Peak Found	Peak Found	Peak Found	Not Found	High	1
FALSE	High	Master Protein	F2Z2E2	Ras GTPase-activating-like protein IQGAP3 OS=Homo sapiens OX=9606 GN=IQGAP3 PE=1 SV=1	0	22.278	3	5	41	2	1588	179.4	7.66	22277		5		0	0	100	100	100	100	5.33141e-17	6.62708e-17	5.41217e-17	3.00121e-17					151.4	32	148.5		41.2	Peak Found	Peak Found	Peak Found	Not Found	Peak Found	1
FALSE	High	Master Protein	Q15637	Splicing factor 1 OS=Homo sapiens OX=9606 GN=SF1 PE=1 SV=4	0	22.071	11	6	7	6	639	68.3	8.98	3082		6		0	0	0.751	1.772	2.229	17.75	0.999286	0.579598	0.467176	0.459545	0	2.23	0	32.4	11.8	38.8	35	21.8	742.9	Peak Found	Peak Found	Peak Found	Peak Found	High	1
FALSE	High	Master Protein	Q92878	DNA repair protein RAD50 OS=Homo sapiens OX=9606 GN=RAD50 PE=1 SV=1	0	21.767	7	10	15	10	1312	153.8	6.89	4711		10		0	0	0.28	1.192	0.775	0.473	0.711912	0.984196	0.60531	0.978392	40.44	22.82	28.44	0	38.6	244.2	109.2	224.1	5	Peak Found	High	Peak Found	High	Peak Found	1
FALSE	High	Master Protein	Q5T447	E3 ubiquitin-protein ligase HECTD3 OS=Homo sapiens OX=9606 GN=HECTD3 PE=1 SV=1	0	21.678	9	7	23	7	861	97.1	5.64	8031		7		0	0	1.087	1.087	1.172	0.884	0.999286	0.991485	0.993395	0.996927	20.22	10.25	2.89	30.31	105.5	101.4	107	93	87.8	High	High	High	High	High	1
FALSE	High	Master Protein	A0A590UJG2	Microtubule-actin cross-linking factor 1, isoforms 1/2/3/5 OS=Homo sapiens OX=9606 GN=MACF1 PE=1 SV=1	0	21.519	2	9	23	9	5379	614.5	5.36	5736		9		0	0	0.349	0.592	0.966	0.01	0.832631	0.498878	0.919134	3.00121e-17	13.49	30.98	23.65		59.4	132.7	179.9	203.9		Peak Found	High	High	High	Not Found	1
FALSE	High	Master Protein	Q08AF3	Schlafen family member 5 OS=Homo sapiens OX=9606 GN=SLFN5 PE=1 SV=1	0	21.43	9	8	8	8	891	101	8.22	3125		8		0	0	5.705	5.572	3.95	17.942	0.214642	0.00153144	0.0422512	0.457357	0	0	0	0	97.8	124.9	85.9	5.3	436.3	Peak Found	Peak Found	Peak Found	Peak Found	High	1
FALSE	High	Master Protein	P98082	Disabled homolog 2 OS=Homo sapiens OX=9606 GN=DAB2 PE=1 SV=3	0	21.41	12	7	7	7	770	82.4	5.53	2860		7		0	0				100				3.00121e-17									886.4	Not Found	Not Found	Not Found	Not Found	High	1
FALSE	High	Master Protein	Q8N392	Rho GTPase-activating protein 18 OS=Homo sapiens OX=9606 GN=ARHGAP18 PE=1 SV=3	0	21.33	11	6	6	6	663	74.9	6.44	2894		6		0	0				100				3.00121e-17									861.5	Not Found	Not Found	Not Found	Not Found	High	1
FALSE	High	Master Protein	Q12788	Transducin beta-like protein 3 OS=Homo sapiens OX=9606 GN=TBL3 PE=1 SV=2	0	21.19	13	8	21	8	808	89	6.9	6473		8		0	0	1.079	0.921	0.936	0.651	0.999286	0.974388	0.88991	0.984872	32.85	30.4	36.22	28.02	101.4	98.9	98	110.2	69.8	High	Peak Found	Peak Found	Peak Found	High	1
FALSE	High	Master Protein	A0A0C4DH22	Band 4.1-like protein 1 OS=Homo sapiens OX=9606 GN=EPB41L1 PE=1 SV=1	0	20.995	10	7	7	7	880	98.3	5.62	2648		7		0	0				100				3.00121e-17									893.2	Not Found	Not Found	Not Found	Not Found	High	1
FALSE	High	Master Protein	P60842	Eukaryotic initiation factor 4A-I OS=Homo sapiens OX=9606 GN=EIF4A1 PE=1 SV=1	0	20.731	20	7	27	7	406	46.1	5.48	7139		7		0	0	0.445	0.796	1.158	0.187	0.922629	0.873487	0.998113	0.818107	19.58	40.2	10.71	34.64	70.7	111.6	142.4	155.2	23.1	High	High	High	High	High	1
FALSE	High	Master Protein	O75116	Rho-associated protein kinase 2 OS=Homo sapiens OX=9606 GN=ROCK2 PE=1 SV=4	0	20.691	6	7	14	5	1388	160.8	6.02	4213		7		0	2	0.661	1.161	1.12	0.299	0.999286	0.986398	0.997209	0.912127	13.77	12.04	36.6	457.28	98	165.3	104.3	95.6	47.5	Peak Found	High	High	High	Peak Found	1
FALSE	High	Master Protein	O96005	Cleft lip and palate transmembrane protein 1 OS=Homo sapiens OX=9606 GN=CLPTM1 PE=1 SV=1	0	20.633	10	7	17	7	669	76	6.3	5582		7		0	0	1.837	2.188	1.525	3.672	0.956623	0.311014	0.759036	0.808871	78.12	28.78	18.47	62.08	97.9	62	38.5	30.1	157.5	High	High	Peak Found	High	High	1
FALSE	High	Master Protein	Q9UI26-2	Isoform 2 of Importin-11 OS=Homo sapiens OX=9606 GN=IPO11	0	20.568	6	6	17	5	1015	116.9	5.41	8535		6		0	0	1.047	1.258	1.142	2.14	0.999286	0.950576	0.99817	0.913451	14.85	10.19	17.01	18.36	98.7	117.1	116.8	90.3	175	High	High	Peak Found	Peak Found	High	1
FALSE	High	Master Protein	A0A669KAW3	DNA mismatch repair protein Mlh1 (Fragment) OS=Homo sapiens OX=9606 GN=MLH1 PE=1 SV=1	0	20.553	8	5	5	5	686	76.7	6.51	2782		5		0	0				100				3.00121e-17									900	Not Found	Not Found	Not Found	Not Found	High	1
FALSE	High	Master Protein	Q6ZRP7	Sulfhydryl oxidase 2 OS=Homo sapiens OX=9606 GN=QSOX2 PE=1 SV=3	0	20.274	8	6	12	6	698	77.5	7.72	5311		6		0	0	2.174	2.099	2.045	3.74	0.892093	0.360236	0.281886	0.808581	30.43	12.22	12.95	21.22	126.7	127.9	81	49.1	219	High	High	Peak Found	Peak Found	High	1
FALSE	High	Master Protein	Q08AM6	Protein VAC14 homolog OS=Homo sapiens OX=9606 GN=VAC14 PE=1 SV=1	0	20.148	10	7	7	7	782	87.9	6.13	3074		7		0	0		100	100	100		6.62708e-17	5.41217e-17	3.00121e-17						9.3	85.8		804.9	Not Found	Peak Found	Peak Found	Not Found	High	1
FALSE	High	Master Protein	E7ER68	Protein FAM91A1 OS=Homo sapiens OX=9606 GN=FAM91A1 PE=1 SV=1	0	20.106	8	5	5	5	789	88.9	6.76	2450		5		0	0	0.01	0.01	1.456	5.957	5.33141e-17	6.62708e-17	0.932939	0.700851			0	0			24.6	16.9	813.6	Not Found	Not Found	Peak Found	Peak Found	High	1
FALSE	High	Master Protein	Q9NRZ9	Lymphoid-specific helicase OS=Homo sapiens OX=9606 GN=HELLS PE=1 SV=1	0	20.104	7	6	7	6	838	97	7.93	3163		6		0	0	0.01	0.01	0.01	9.708	5.33141e-17	6.62708e-17	5.41217e-17	0.607495				0				18	882	Not Found	Not Found	Not Found	Peak Found	High	1
FALSE	High	Master Protein	Q01780	Exosome component 10 OS=Homo sapiens OX=9606 GN=EXOSC10 PE=1 SV=2	0	19.946	11	8	8	8	885	100.8	8.46	2340		8		0	0	100		100	100	5.33141e-17		5.41217e-17	3.00121e-17					4.7		479.9		216.9	Peak Found	Not Found	High	Not Found	High	1
FALSE	High	Master Protein	O00592	Podocalyxin OS=Homo sapiens OX=9606 GN=PODXL PE=1 SV=2	0	19.859	10	5	39	5	558	58.6	5.49	15844		5		0	0	1.14	1.258	1.445	0.999	0.999286	0.950576	0.838772	0.984872	15.26	11.67	26.74	22.45	114.3	109	127	89.9	96.3	High	High	High	High	High	1
FALSE	High	Master Protein	Q93008	Probable ubiquitin carboxyl-terminal hydrolase FAF-X OS=Homo sapiens OX=9606 GN=USP9X PE=1 SV=4	0	19.784	3	7	11	7	2554	290.3	5.8	3888		7		0	0	1.968	1.418	1.246	0.201	0.922629	0.862357	0.965599	0.828969	30.43	19.14	10.58	0	135.8	104.1	91.8	64.9	3.6	High	High	High	Peak Found	Peak Found	1
FALSE	High	Master Protein	P29317	Ephrin type-A receptor 2 OS=Homo sapiens OX=9606 GN=EPHA2 PE=1 SV=2	0	19.692	9	8	17	6	976	108.2	6.23	4971		8		0	2	1.386	1.84	1.629	1.691	0.999286	0.528993	0.649913	0.956927	14.45	17.31	17.35	20.9	118.3	135.5	118.2	62.1	125.5	Peak Found	High	Peak Found	Peak Found	High	1
FALSE	High	Master Protein	Q99523	Sortilin OS=Homo sapiens OX=9606 GN=SORT1 PE=1 SV=3	0	19.561	8	6	22	6	831	92	5.74	7946		6		0	0	0.804	0.995	1.196	0.413	0.999286	0.986398	0.987625	0.966819	19.04	15.9	26.62	12.65	99	119.7	119.3	122.8	49.9	High	High	High	High	High	1
FALSE	High	Master Protein	B5MDF5	GTP-binding nuclear protein Ran OS=Homo sapiens OX=9606 GN=RAN PE=1 SV=1	0	19.48	23	5	33	5	233	26.2	7.01	14992		5		0	0	0.655	1.472	1.091	0.401	0.999286	0.826764	0.987625	0.964825	30.92	19.78	53	58.03	132.9	120.6	89.4	71	33.4	High	High	High	High	High	1
FALSE	High	Master Protein	Q2TAL8	Glutamine-rich protein 1 OS=Homo sapiens OX=9606 GN=QRICH1 PE=1 SV=1	0	19.415	8	5	5	5	776	86.4	5.87	2619		5		0	0				100				3.00121e-17									900	Not Found	Not Found	Not Found	Not Found	High	1
FALSE	High	Master Protein	Q86VS8	Protein Hook homolog 3 OS=Homo sapiens OX=9606 GN=HOOK3 PE=1 SV=2	0	19.191	12	6	6	6	718	83.1	5.17	2181		6		0	0	0.01	1.041	0.01	4.653	5.33141e-17	0.997378	5.41217e-17	0.759164		0		0		46		44.2	752.1	Not Found	Peak Found	Not Found	Peak Found	High	1
FALSE	High	Master Protein	P47929	Galectin-7 OS=Homo sapiens OX=9606 GN=LGALS7 PE=1 SV=2	0	19.157	32	5	11	5	136	15.1	7.62	5290		5		0	0	0.021	0.034	0.061	0.011	0.00422725	9.18294e-13	5.91791e-14	0.197715	116.04	71.05	72.85	94.12	14.8	35.2	17.5	690.6	12.8	Peak Found	Peak Found	Peak Found	High	Peak Found	1
FALSE	High	Master Protein	Q8TB96	T-cell immunomodulatory protein OS=Homo sapiens OX=9606 GN=ITFG1 PE=1 SV=1	0	19.13	8	5	36	5	612	68.1	5.39	15255		5		0	0	0.849	1.052	1.306	0.473	0.999286	0.999106	0.934671	0.978466	1.92	12.01	9.36	28.58	104.1	107.2	131.3	87.6	79.2	High	High	High	High	High	1
FALSE	High	Master Protein	Q9UP83	Conserved oligomeric Golgi complex subunit 5 OS=Homo sapiens OX=9606 GN=COG5 PE=1 SV=3	0	19.124	9	7	7	7	839	92.7	6.6	3181		7		0	0	100	100	100	100	5.33141e-17	6.62708e-17	5.41217e-17	3.00121e-17					41.2	97.4	24.2		656.8	Peak Found	Peak Found	Peak Found	Not Found	High	1
FALSE	High	Master Protein	Q01650	Large neutral amino acids transporter small subunit 1 OS=Homo sapiens OX=9606 GN=SLC7A5 PE=1 SV=2	0	19.056	7	4	18	4	507	55	7.72	7240		4		0	0	2.434	2.985	2.314	3.647	0.853535	0.0843847	0.160621	0.808871	153.04	133.52	91.99	473.46	99.1	124.7	102.5	62.3	195.7	High	High	High	High	High	1
FALSE	High	Master Protein	P02768	Albumin OS=Homo sapiens OX=9606 GN=ALB PE=1 SV=2	0	19.026	9	5	16	5	609	69.3	6.28	5925		5		0	0	0.645	0.481	0.433	0.288	0.999286	0.264792	0.0342019	0.90586	63	35.75	39.42	80.46	86	68	58	287.2	60.9	Peak Found	High	High	High	Peak Found	1
FALSE	High	Master Protein	P54802	Alpha-N-acetylglucosaminidase OS=Homo sapiens OX=9606 GN=NAGLU PE=1 SV=2	0	19.025	8	5	29	5	743	82.2	6.65	9172		5		0	0	0.701	0.951	0.975	0.396	0.999286	0.986398	0.92938	0.964825	9.7	35.75	45.04	57.74	99	109.4	127.7	135.6	65.4	High	High	High	High	High	1
FALSE	High	Master Protein	Q9H1B7	Probable E3 ubiquitin-protein ligase IRF2BPL OS=Homo sapiens OX=9606 GN=IRF2BPL PE=1 SV=1	0	19.012	11	7	8	7	796	82.6	8.24	2662		7		0	0				100				3.00121e-17									900	Not Found	Not Found	Not Found	Not Found	High	1
FALSE	High	Master Protein	O43264	Centromere/kinetochore protein zw10 homolog OS=Homo sapiens OX=9606 GN=ZW10 PE=1 SV=3	0	18.978	10	6	7	6	779	88.8	6.27	2598		6		0	0				100				3.00121e-17									900	Not Found	Not Found	Not Found	Not Found	High	1
FALSE	High	Master Protein	O43815	Striatin OS=Homo sapiens OX=9606 GN=STRN PE=1 SV=4	0	18.786	8	5	6	4	780	86.1	5.27	3009		5		0	0				100				3.00121e-17									900	Not Found	Not Found	Not Found	Not Found	High	1
FALSE	High	Master Protein	Q9HD20	Manganese-transporting ATPase 13A1 OS=Homo sapiens OX=9606 GN=ATP13A1 PE=1 SV=2	0	18.776	5	6	19	6	1204	132.9	8.13	7817		6		0	0	0.701	0.968	1.234	0.211	0.999286	0.986398	0.972863	0.849375	16.65	29.78	23.59	19.14	89	121	157.4	127.8	27.2	High	High	High	High	Peak Found	1
FALSE	High	Master Protein	Q6IN85	Serine/threonine-protein phosphatase 4 regulatory subunit 3A OS=Homo sapiens OX=9606 GN=PPP4R3A PE=1 SV=1	0	18.728	10	7	8	7	833	95.3	4.94	2592		7		0	0	100			100	5.33141e-17			3.00121e-17					47.1				824.6	Peak Found	Not Found	Not Found	Not Found	High	1
FALSE	High	Master Protein	O43314	Inositol hexakisphosphate and diphosphoinositol-pentakisphosphate kinase 2 OS=Homo sapiens OX=9606 GN=PPIP5K2 PE=1 SV=3	0	18.546	5	6	16	6	1243	140.3	8.22	5971		6		0	0	1.019	0.853	1.02	0.297	0.999286	0.932346	0.954707	0.910719	5.32	15.54	14.9	25.22	122.1	108.9	106	125.3	37.4	High	High	Peak Found	High	High	1
FALSE	High	Master Protein	P53985	Monocarboxylate transporter 1 OS=Homo sapiens OX=9606 GN=SLC16A1 PE=1 SV=3	0	18.512	7	4	27	4	500	53.9	8.66	13567		4		0	0	0.842	1.175	1.079	0.389	0.999286	0.986398	0.987108	0.962649	21.01	18.85	23.26	38.91	101.2	138.3	117.2	109.4	68.5	High	High	High	High	High	1
FALSE	High	Master Protein	Q5JPE7	Nodal modulator 2 OS=Homo sapiens OX=9606 GN=NOMO2 PE=1 SV=1	0	18.456	6	6	19	6	1267	139.4	5.76	5766		6		0	0	0.635	1.011	1.317	0.355	0.999286	0.986398	0.932017	0.94193	12.77	14.33	36.75	4.02	90.6	126.7	132.5	149.1	44.3	High	High	Peak Found	High	Peak Found	1
FALSE	High	Master Protein	P04843	Dolichyl-diphosphooligosaccharide--protein glycosyltransferase subunit 1 OS=Homo sapiens OX=9606 GN=RPN1 PE=1 SV=1	0	18.278	13	7	28	7	607	68.5	6.38	7409		7		0	0	0.582	0.808	1.064	0.304	0.985423	0.885706	0.976793	0.915968	24.39	11.81	5.76	23.8	83.7	116.5	136.5	139.1	39.3	High	High	High	High	Peak Found	1
FALSE	High	Master Protein	Q8N1B4	Vacuolar protein sorting-associated protein 52 homolog OS=Homo sapiens OX=9606 GN=VPS52 PE=1 SV=1	0	18.243	9	5	5	5	723	82.2	5.99	2524		5		0	0	100	100		100	5.33141e-17	6.62708e-17		3.00121e-17					22.7	35.1			829.9	Peak Found	Peak Found	Not Found	Not Found	High	1
FALSE	High	Master Protein	Q16643	Drebrin OS=Homo sapiens OX=9606 GN=DBN1 PE=1 SV=4	0	18.18	13	6	6	6	649	71.4	4.45	2455		6		0	0	100	100	100	100	5.33141e-17	6.62708e-17	5.41217e-17	3.00121e-17					43	24.4	79.1		584.9	High	Peak Found	Peak Found	Not Found	High	1
FALSE	High	Master Protein	Q96PZ0	Pseudouridylate synthase 7 homolog OS=Homo sapiens OX=9606 GN=PUS7 PE=1 SV=2	0	18.155	13	7	7	7	661	75	6.37	2545		7		0	0	100	100	100	100	5.33141e-17	6.62708e-17	5.41217e-17	3.00121e-17					49.4	60.1	23.9		655.6	Peak Found	Peak Found	Peak Found	Not Found	High	1
FALSE	High	Master Protein	Q9Y2W2	WW domain-binding protein 11 OS=Homo sapiens OX=9606 GN=WBP11 PE=1 SV=1	0	18.039	11	6	6	6	641	70	8.38	2474		6		0	0	1.706	1.048	0.01	7.532	0.874614	0.997573	5.41217e-17	0.666	0	0		55.9	39.3	24.1		34.4	553.7	Peak Found	Peak Found	Not Found	Peak Found	High	1
FALSE	High	Master Protein	Q9H270	Vacuolar protein sorting-associated protein 11 homolog OS=Homo sapiens OX=9606 GN=VPS11 PE=1 SV=1	0	17.993	8	7	7	7	941	107.8	7.05	2630		7		0	0	0.787			1.747	0.999286			0.94193	0			0	172.4	70.9	48.9	17.3	244.4	High	Peak Found	Peak Found	Peak Found	High	1
FALSE	High	Master Protein	P83436	Conserved oligomeric Golgi complex subunit 7 OS=Homo sapiens OX=9606 GN=COG7 PE=1 SV=1	0	17.979	9	6	8	6	770	86.3	5.47	3398		6		0	0	3.212	0.01	2.236	5.932	0.559353	6.62708e-17	0.368599	0.727525	27.28		0	24.07	99		96.5	25.6	421.8	Peak Found	Not Found	Peak Found	Peak Found	High	1
FALSE	High	Master Protein	F8VSC5	SCY1-like protein 2 (Fragment) OS=Homo sapiens OX=9606 GN=SCYL2 PE=1 SV=1	0	17.939	10	5	5	5	681	77	7.05	2266		5		0	0	0.94	0.01		4.003	0.999286	6.62708e-17		0.798058	0			0	68.5		74.5	33.6	489.9	Peak Found	Not Found	Peak Found	Peak Found	High	1
FALSE	High	Master Protein	P04083	Annexin A1 OS=Homo sapiens OX=9606 GN=ANXA1 PE=1 SV=2	0	17.88	23	6	8	6	346	38.7	7.02	2677		6		0	0	0.169	0.255	0.225	0.037	0.417866	0.00906257	8.15365e-05	0.465253	52.15	45.49	64.95	78.13	40.9	59.7	51.4	492.8	5.7	Peak Found	High	Peak Found	High	Peak Found	1
FALSE	High	Master Protein	Q9NZT1	Calmodulin-like protein 5 OS=Homo sapiens OX=9606 GN=CALML5 PE=1 SV=2	0	17.814	37	5	10	5	146	15.9	4.44	4925		5		0	0	0.27	0.491	0.507	0.196	0.697781	0.284816	0.090383	0.828969	51.35	32.94	27.32	64.97	61.1	101.3	76.2	277	34.9	Peak Found	Peak Found	Peak Found	High	Peak Found	1
FALSE	High	Master Protein	O75717	WD repeat and HMG-box DNA-binding protein 1 OS=Homo sapiens OX=9606 GN=WDHD1 PE=1 SV=1	0	17.584	6	6	9	6	1129	125.9	5.62	3774		6		0	0	0.336	0.877	1.059	0.35	0.793176	0.948794	0.972863	0.941302	49.73	27.46	25.57	201.55	53.6	130.1	152.3	130.7	215.9	Peak Found	Peak Found	Peak Found	High	High	1
FALSE	High	Master Protein	K4DIA7	Tetraspanin (Fragment) OS=Homo sapiens OX=9606 GN=CD151 PE=1 SV=1	0	17.565	18	5	25	5	230	25.6	7.24	13180		5		0	0	0.764	1.19	1.038	0.407	0.999286	0.984381	0.963133	0.964825	6.68	6.25	15.71	20.53	97.6	142.4	116.4	126.6	52.3	High	High	High	High	High	1
FALSE	High	Master Protein	Q08554	Desmocollin-1 OS=Homo sapiens OX=9606 GN=DSC1 PE=1 SV=2	0	17.403	6	4	11	4	894	99.9	5.43	4368		4		0	0	0.298	0.509	0.265	0.18	0.749947	0.314694	0.000489981	0.810082	29.77	6.52	6.04	12.78	39.5	63.7	41.2	143.6	19.3	Peak Found	Peak Found	Peak Found	High	Peak Found	1
FALSE	High	Master Protein	P09874	Poly [ADP-ribose] polymerase 1 OS=Homo sapiens OX=9606 GN=PARP1 PE=1 SV=4	0	17.338	7	6	6	6	1014	113	8.88	2217		6		0	0	2.861	6.068	3.669	11.201	0.60536	0.000786863	0.0585444	0.573647	0	0	0	0	97.9	184.6	92.8	7	379.1	Peak Found	Peak Found	Peak Found	Peak Found	High	1
FALSE	High	Master Protein	A0A2U3TZM0	DNA helicase OS=Homo sapiens OX=9606 GN=CHD4 PE=1 SV=1	0	17.286	2	4	18	2	1902	216.7	6	8848		4		0	2	1.023	1.046	1.087	0.057	0.999286	0.997378	0.987625	0.561597	19.97	4.79	21.3	0	108.2	110.6	112.2	106	1.3	High	High	High	High	Not Found	1
FALSE	High	Master Protein	Q92896	Golgi apparatus protein 1 OS=Homo sapiens OX=9606 GN=GLG1 PE=1 SV=2	0	17.276	7	7	16	7	1179	134.5	6.9	4903		7		0	0	0.579	0.849	0.992	0.143	0.985423	0.931103	0.932939	0.766974	15.76	19.38	16.88	12.07	85.1	130.5	130.9	157.9	11.3	High	High	High	High	Peak Found	1
FALSE	High	Master Protein	Q15758	Neutral amino acid transporter B(0) OS=Homo sapiens OX=9606 GN=SLC1A5 PE=1 SV=2	0	17.183	13	6	17	6	541	56.6	5.48	4785		6		0	0	1.018	1.108	0.814	0.639	0.999286	0.986398	0.683183	0.984872	22.7	31.75	54.65	60.86	120.9	93.8	94.8	107	67.1	High	High	Peak Found	Peak Found	High	1
FALSE	High	Master Protein	Q14008	Cytoskeleton-associated protein 5 OS=Homo sapiens OX=9606 GN=CKAP5 PE=1 SV=3	0	17.144	3	6	15	6	2032	225.4	7.8	5152		6		0	0	12.096	4.253	3.711	13.811	0.092798	0.0105045	0.0545145	0.350738	0	0	0	0	174.3	85	52.8	3.7	75.9	High	High	Peak Found	Peak Found	High	1
FALSE	High	Master Protein	O14967	Calmegin OS=Homo sapiens OX=9606 GN=CLGN PE=1 SV=1	0	17.133	9	5	5	4	610	70	4.69	2534		5		0	0	1.503	0.496	3.014	4.298	0.922629	0.290466	0.177601	0.755799	0	0	0	0	60.2	16.3	98.9	32.8	456.2	Peak Found	Peak Found	Peak Found	Peak Found	High	1
FALSE	High	Master Protein	Q5T749	Keratinocyte proline-rich protein OS=Homo sapiens OX=9606 GN=KPRP PE=1 SV=1	0	17.047	12	6	15	6	579	64.1	8.27	5626		6		0	0	0.193	0.349	0.32	0.106	0.490601	0.0607389	0.00306855	0.724444	39.79	17.79	33.77	27.54	34.5	70.5	65.2	204.8	15.8	Peak Found	High	High	High	Peak Found	1
FALSE	High	Master Protein	Q9UPU5	Ubiquitin carboxyl-terminal hydrolase 24 OS=Homo sapiens OX=9606 GN=USP24 PE=1 SV=3	0	16.995	3	6	13	6	2620	294.2	6.14	4097		6		0	0	6.485	2.982	2.536	0.542	0.283296	0.0847681	0.330613	0.988392	0	0	0	0	236.6	66.1	33.8	6.4	3.5	High	High	Peak Found	Peak Found	Peak Found	1
FALSE	High	Master Protein	Q9NV70	Exocyst complex component 1 OS=Homo sapiens OX=9606 GN=EXOC1 PE=1 SV=4	0	16.907	7	6	6	6	894	101.9	6.61	2660		6		0	0		100	100	100		6.62708e-17	5.41217e-17	3.00121e-17						12.5	54.3		833.2	Not Found	Peak Found	Peak Found	Not Found	High	1
FALSE	High	Master Protein	Q13488	V-type proton ATPase 116 kDa subunit a3 OS=Homo sapiens OX=9606 GN=TCIRG1 PE=1 SV=3	0	16.87	7	5	5	5	830	92.9	7.12	2206		5		0	0	1.599	1.509	1.468	3.248	0.972405	0.816759	0.885993	0.830431	32.2	20.59	3.4	11.09	96	120.1	108	70.6	221.8	Peak Found	Peak Found	Peak Found	Peak Found	High	1
FALSE	High	Master Protein	Q9HCS7	Pre-mRNA-splicing factor SYF1 OS=Homo sapiens OX=9606 GN=XAB2 PE=1 SV=2	0	16.791	8	7	8	7	855	99.9	6.23	2809		7		0	0	1.829	2.114	1.976	7.767	0.903614	0.353928	0.543578	0.661402	0.93	26.02	21.81	73.06	76.5	72.6	63.5	35.3	378.1	High	Peak Found	Peak Found	Peak Found	High	1
FALSE	High	Master Protein	Q92995	Ubiquitin carboxyl-terminal hydrolase 13 OS=Homo sapiens OX=9606 GN=USP13 PE=1 SV=2	0	16.338	9	6	7	5	863	97.3	5.53	2260		6		0	0	0.743	0.822	1.209	1.197	0.999286	0.900797	0.995782	0.982616	0	0	0	0	92.9	81.2	97.4	63.6	288.9	Peak Found	Peak Found	Peak Found	Peak Found	High	1
FALSE	High	Master Protein	Q6KB66	Keratin, type II cytoskeletal 80 OS=Homo sapiens OX=9606 GN=KRT80 PE=1 SV=2	0	16.219	11	5	10	4	452	50.5	5.67	3706		5		0	0	0.068	0.195	0.111	0.07	0.0953379	0.00131427	3.97448e-09	0.617664	87.1	64.41	86.17	0	22.8	47.1	24.9	362.6	7.5	Peak Found	Peak Found	Peak Found	High	Peak Found	1
FALSE	High	Master Protein	Q9H6T3	RNA polymerase II-associated protein 3 OS=Homo sapiens OX=9606 GN=RPAP3 PE=1 SV=2	0	16.206	11	6	6	6	665	75.7	6.84	2121		6		0	0	100	100		100	5.33141e-17	6.62708e-17		3.00121e-17					10.7	12.4			876.9	Peak Found	Peak Found	Not Found	Not Found	High	1
FALSE	High	Master Protein	J3KMZ9	Low-density lipoprotein receptor (Fragment) OS=Homo sapiens OX=9606 GN=LDLR PE=1 SV=1	0	16.152	6	5	9	5	945	104.6	5.27	3232		5		0	0	1.648	1.512	1.259	1.308	0.977307	0.814057	0.961396	0.980254	31.05	14.24	5.57	15.18	126.6	129.4	91.7	86	94.4	High	Peak Found	Peak Found	Peak Found	High	1
FALSE	High	Master Protein	Q92538	Golgi-specific brefeldin A-resistance guanine nucleotide exchange factor 1 OS=Homo sapiens OX=9606 GN=GBF1 PE=1 SV=2	0	16.022	3	5	9	4	1859	206.3	5.73	4991		5		0	0	1.418	2.197	2.188		0.956623	0.307275	0.502699		0	0	0		71	110	109.6	50.1	128	Peak Found	Peak Found	Peak Found	Peak Found	High	1
FALSE	High	Master Protein	Q9BVQ7	Spermatogenesis-associated protein 5-like protein 1 OS=Homo sapiens OX=9606 GN=SPATA5L1 PE=1 SV=2	0	15.927	7	4	5	4	753	80.7	8.09	2398		4		0	0	100	100	100	100	5.33141e-17	6.62708e-17	5.41217e-17	3.00121e-17					147.5	100.9	70.8		322.2	Peak Found	Peak Found	Peak Found	Not Found	High	1
FALSE	High	Master Protein	P48960	Adhesion G protein-coupled receptor E5 OS=Homo sapiens OX=9606 GN=ADGRE5 PE=1 SV=4	0	15.897	4	3	17	3	835	91.8	6.87	8530		3		0	0	1.07	1.218	1.096	0.655	0.999286	0.968015	0.987625	0.985721	79.91	6.52	0	126.87	107.4	152.2	60.3	108.6	78.9	High	High	High	High	High	1
FALSE	High	Master Protein	P31947	14-3-3 protein sigma OS=Homo sapiens OX=9606 GN=SFN PE=1 SV=1	0	15.849	25	5	9	4	248	27.8	4.74	3231		5		0	1	0.074	0.05	0.729	0.201	0.113606	3.09033e-10	0.502859	0.835636	346.79	37.6	0	0	34.6	98.7	67.1	500.2	18.5	Peak Found	Peak Found	Not Found	High	Not Found	1
FALSE	High	Master Protein	H0YN14	Importin-4 OS=Homo sapiens OX=9606 GN=IPO4 PE=1 SV=1	0	15.796	6	5	12	5	911	101.4	5.05	4219		5		0	0	0.987	1.584	1.221	1.29	0.999286	0.74601	0.976805	0.98191	23.79	73.34	12.94	10.42	105.4	163.7	114.5	100.6	120.9	High	High	High	Peak Found	High	1
FALSE	High	Master Protein	Q9UIQ6	Leucyl-cystinyl aminopeptidase OS=Homo sapiens OX=9606 GN=LNPEP PE=1 SV=3	0	15.711	5	6	16	5	1025	117.3	5.73	5778		6		0	0	0.399	0.869	0.929	0.079	0.887933	0.943406	0.88221	0.650841	15.09	15.42	11.95	10.87	98.3	98.1	165.7	84.6	72.5	High	High	High	High	Peak Found	1
FALSE	High	Master Protein	P13473	Lysosome-associated membrane glycoprotein 2 OS=Homo sapiens OX=9606 GN=LAMP2 PE=1 SV=2	0	15.681	6	3	27	3	410	44.9	5.63	18190		3		0	0	0.712	1.075	1.098	0.35	0.999286	0.996923	0.987625	0.941302	14.39	25.7	4.25	2.13	90.2	130.4	138.1	124.8	43.2	High	High	High	High	High	1
FALSE	High	Master Protein	P49754	Vacuolar protein sorting-associated protein 41 homolog OS=Homo sapiens OX=9606 GN=VPS41 PE=1 SV=3	0	15.618	7	6	17	6	854	98.5	5.85	5782		6		0	0	1.98	0.827	1.247	1.455	0.922629	0.901011	0.982541	0.971083	29.37	11.52	10.43	19.86	139	52.2	60.3	51.7	128.1	High	Peak Found	Peak Found	Peak Found	High	1
FALSE	High	Master Protein	A8MXP9	Matrin-3 OS=Homo sapiens OX=9606 GN=MATR3 PE=1 SV=1	0	15.602	6	6	6	6	895	99.9	6.04	2683		6		0	0	1.66	1.011	3.796	8.731	0.887933	0.986398	0.0640422	0.630146	0	0	0	0	46.4	16.8	81.8	16.6	663.1	Peak Found	Peak Found	Peak Found	Peak Found	High	1
FALSE	High	Master Protein	Q9H2H9	Sodium-coupled neutral amino acid transporter 1 OS=Homo sapiens OX=9606 GN=SLC38A1 PE=1 SV=1	0	15.587	9	5	25	5	487	54	7.02	9571		5		0	0	0.841	1.058	1.196	0.441	0.999286	0.999106	0.987625	0.971083	9.12	15.38	22.04	29.46	94.8	126.6	133.6	118.1	51.8	High	High	High	High	High	1
FALSE	High	Master Protein	Q9UDY8	Mucosa-associated lymphoid tissue lymphoma translocation protein 1 OS=Homo sapiens OX=9606 GN=MALT1 PE=1 SV=1	0	15.49	9	5	6	5	824	92.2	5.73	1680		5		0	0	100		100	100	5.33141e-17		5.41217e-17	3.00121e-17					40.5		58.3		733.2	Peak Found	Not Found	Peak Found	Not Found	High	1
FALSE	High	Master Protein	A6NMQ1	DNA polymerase OS=Homo sapiens OX=9606 GN=POLA1 PE=1 SV=1	0	15.463	5	6	13	6	1468	166.4	5.81	3615		6		0	0	0.351	0.745	0.946	0.11	0.832631	0.826764	0.898226	0.71376	16.43	17.24	20.5	0	64.1	153.2	141.4	209.6	7.2	Peak Found	High	High	High	Peak Found	1
FALSE	High	Master Protein	C9JZR2	Catenin delta-1 OS=Homo sapiens OX=9606 GN=CTNND1 PE=1 SV=2	0	15.254	5	4	4	4	938	104.8	6.87	2090		4		0	0	0.615	0.911	1.119	4.8	0.977307	0.966518	0.987625	0.753347	11.31	67.05	42.82	1.58	32.1	78.6	63.5	51.1	459.8	Peak Found	Peak Found	Peak Found	Peak Found	High	1
FALSE	High	Master Protein	Q9ULT8	E3 ubiquitin-protein ligase HECTD1 OS=Homo sapiens OX=9606 GN=HECTD1 PE=1 SV=3	0	15.215	2	5	15	5	2610	289.2	5.35	4482		5		0	0	1.019	0.945	1.274	0.469	0.999286	0.986398	0.954707	0.978392	18.13	15.14	8.15	94.29	105.2	99	128.5	101.3	47.3	High	High	High	Peak Found	Peak Found	1
FALSE	High	Master Protein	Q14137	Ribosome biogenesis protein BOP1 OS=Homo sapiens OX=9606 GN=BOP1 PE=1 SV=2	0	15.192	7	5	5	5	746	83.6	6.19	2073		5		0	0	100	100	100	100	5.33141e-17	6.62708e-17	5.41217e-17	3.00121e-17					62.2	94.7	32.5		530.5	Peak Found	Peak Found	Peak Found	Not Found	High	1
FALSE	High	Master Protein	A0A087X295	WD repeat-containing protein 6 OS=Homo sapiens OX=9606 GN=WDR6 PE=1 SV=1	0	15.182	6	5	16	5	1151	124.9	6.92	5723		5		0	0	0.873	1.047	1.186	0.429	0.999286	0.997378	0.987625	0.971083	6.06	15.98	8.23	21.73	93.8	121.1	128.6	122.9	43.2	High	High	High	High	Peak Found	1
FALSE	High	Master Protein	Q06830	Peroxiredoxin-1 OS=Homo sapiens OX=9606 GN=PRDX1 PE=1 SV=1	0	15.163	13	3	17	2	199	22.1	8.13	7809		3		0	2	0.424	0.544	0.739	0.158	0.909077	0.392623	0.526511	0.795784	49.77	19.18	39.74	77.35	46.7	88.8	89.7	189.1	22.7	Peak Found	Peak Found	High	Peak Found	Peak Found	1
FALSE	High	Master Protein	Q01469	Fatty acid-binding protein 5 OS=Homo sapiens OX=9606 GN=FABP5 PE=1 SV=3	0	15.125	33	5	25	5	135	15.2	7.01	9825		5		0	0	0.782	0.497	0.474	0.146	0.999286	0.292662	0.0599089	0.773005	17.19	9.64	29.89	11.67	91.2	62.4	57.8	133.9	13.7	High	High	High	High	High	1
FALSE	High	Master Protein	P42285	Exosome RNA helicase MTR4 OS=Homo sapiens OX=9606 GN=MTREX PE=1 SV=3	0	15.051	6	6	14	6	1042	117.7	6.52	3959		6		0	0	0.642	0.83	1.021	0.114	0.999286	0.906045	0.954707	0.729255	11.2	34.17	26.28	13.82	93.6	101.9	160	116.7	21.3	High	High	High	High	Peak Found	1
FALSE	High	Master Protein	P19971	Thymidine phosphorylase OS=Homo sapiens OX=9606 GN=TYMP PE=1 SV=2	0	15.048	11	5	5	5	482	49.9	5.53	1884		5		0	0	0.01	0.01	0.01	0.01	5.33141e-17	6.62708e-17	5.41217e-17	3.00121e-17								900		Not Found	Not Found	Not Found	High	Not Found	1
FALSE	High	Master Protein	A8MYT4	Phosphatidylinositol 3-kinase catalytic subunit type 3 OS=Homo sapiens OX=9606 GN=PIK3C3 PE=1 SV=2	0	14.969	5	5	5	5	824	94.3	6.64	2398		5		0	0	100	100		100	5.33141e-17	6.62708e-17		3.00121e-17					145.1	14.1			542.7	Peak Found	Peak Found	Not Found	Not Found	High	1
FALSE	High	Master Protein	O00148	ATP-dependent RNA helicase DDX39A OS=Homo sapiens OX=9606 GN=DDX39A PE=1 SV=2	0	14.937	12	5	15	1	427	49.1	5.68	5152		5		0	4	1.672	1.256	1.279	0.899	0.975398	0.950576	0.954599	0.993586	19.58	53.37	18.03	60.29	102.5	113.1	93.3	141.8	89.8	Peak Found	Peak Found	Peak Found	Peak Found	High	1
FALSE	High	Master Protein	Q92805	Golgin subfamily A member 1 OS=Homo sapiens OX=9606 GN=GOLGA1 PE=1 SV=3	0	14.919	7	5	5	5	767	88.1	5.27	2034		5		0	0	0.01	0.493	0.01	0.629	5.33141e-17	0.284816	5.41217e-17	0.984872		0		0		95.3		193.4	444.2	Not Found	Peak Found	Not Found	Peak Found	High	1
FALSE	High	Master Protein	Q9Y3P9	Rab GTPase-activating protein 1 OS=Homo sapiens OX=9606 GN=RABGAP1 PE=1 SV=3	0	14.891	6	6	14	6	1069	121.7	5.25	3198		6		0	0	100	100	100	100	5.33141e-17	6.62708e-17	5.41217e-17	3.00121e-17					178.3	108.2	80.8		35.3	High	High	Peak Found	Not Found	Peak Found	1
FALSE	High	Master Protein	P29508	Serpin B3 OS=Homo sapiens OX=9606 GN=SERPINB3 PE=1 SV=2	0	14.829	13	5	5	3	390	44.5	6.81	1995		5		0	2	0.148	0.223	0.16	0.076	0.351947	0.00347971	1.00411e-06	0.639271	42.09	59.31	55.67	37.96	98.1	96.8	76.1	239.7	17.2	Peak Found	Peak Found	Peak Found	High	Peak Found	1
FALSE	High	Master Protein	E5RIC7	DNA topoisomerase I (Fragment) OS=Homo sapiens OX=9606 GN=TOP1MT PE=1 SV=2	0	14.782	10	4	10	1	376	44	8.24	5084		4		0	0	2.127	1.485	1.677	0.848	0.90325	0.826764	0.60531	0.990826	0	0	0	0	146.4	102.2	115.4	68.8	58.3	Peak Found	Peak Found	Peak Found	Peak Found	High	1
FALSE	High	Master Protein	Q12996	Cleavage stimulation factor subunit 3 OS=Homo sapiens OX=9606 GN=CSTF3 PE=1 SV=1	0	14.769	7	5	6	5	717	82.9	8.12	2638		5		0	0	3.567	1.95	3.037	11.344	0.47235	0.45016	0.144643	0.570578	14.4	18.27	0	39.11	98.9	59.2	91.6	24.2	422.4	Peak Found	Peak Found	Peak Found	Peak Found	High	1
FALSE	High	Master Protein	A0A087WT45	GRIP1-associated protein 1 OS=Homo sapiens OX=9606 GN=GRIPAP1 PE=1 SV=1	0	14.768	5	5	5	5	796	90.8	5.11	2370		5		0	0	1.494	2.064	1.693	4.835	0.972633	0.381331	0.759036	0.753347	59.93	48.23	152.97	154.34	48.9	69.1	54.6	38.9	406.2	Peak Found	Peak Found	Peak Found	Peak Found	High	1
FALSE	High	Master Protein	K7EMY3	Chromodomain-helicase-DNA-binding protein 5 (Fragment) OS=Homo sapiens OX=9606 GN=CHD5 PE=1 SV=1	0	14.754	3	3	21	1	1060	120.9	6.27	10393		3		0	0	3.713	2.705	1.876	0.212	0.533303	0.134766	0.611966	0.808871	0	0	0	0	153.9	112.1	77.8	41.5	8.8	High	High	High	High	Peak Found	1
FALSE	High	Master Protein	Q15059	Bromodomain-containing protein 3 OS=Homo sapiens OX=9606 GN=BRD3 PE=1 SV=1	0	14.732	8	5	5	5	726	79.5	9.36	2181		5		0	0				100				3.00121e-17									900	Not Found	Not Found	Not Found	Not Found	High	1
FALSE	High	Master Protein	Q08379	Golgin subfamily A member 2 OS=Homo sapiens OX=9606 GN=GOLGA2 PE=1 SV=3	0	14.71	5	5	7	5	1002	113	5.02	2302		5		0	0	100	100	100	100	5.33141e-17	6.62708e-17	5.41217e-17	3.00121e-17					201	116.8	78.5		22.8	High	Peak Found	Peak Found	Not Found	Peak Found	1
FALSE	High	Master Protein	H3BLV9	SRSF protein kinase 1 (Fragment) OS=Homo sapiens OX=9606 GN=SRPK1 PE=1 SV=1	0	14.682	9	5	5	3	671	76	6.28	2175		5		0	2	100		100	100	5.33141e-17		5.41217e-17	3.00121e-17					24.8		18.6		814.6	Peak Found	Not Found	Not Found	Not Found	High	1
FALSE	High	Master Protein	P04040	Catalase OS=Homo sapiens OX=9606 GN=CAT PE=1 SV=3	0	14.579	13	5	6	5	527	59.7	7.39	1846		5		0	0	0.185	0.342	0.535	0.01	0.458895	0.0538513	0.125074	3.00121e-17	39.46	0.08	4.69		27.7	46.5	72.3	218.8		Peak Found	High	Peak Found	High	Not Found	1
FALSE	High	Master Protein	H0YD13	CD44 antigen OS=Homo sapiens OX=9606 GN=CD44 PE=1 SV=2	0	14.575	22	4	14	4	206	22.7	8.19	6322		4		0	0	1.422	1.368	1.283	1.192	0.988291	0.889802	0.949586	0.982616	1.38	1.83	32.63	43.91	112.6	112.1	98.4	102.2	132.3	High	High	High	High	High	1
FALSE	High	Master Protein	Q9H9A5	CCR4-NOT transcription complex subunit 10 OS=Homo sapiens OX=9606 GN=CNOT10 PE=1 SV=1	0	14.518	8	5	6	5	744	82.3	7.78	2485		5		0	0	100			100	5.33141e-17			3.00121e-17					103.2				553.4	Peak Found	Not Found	Not Found	Not Found	High	1
FALSE	High	Master Protein	A0A1W2PNW1	Signal transducer and activator of transcription (Fragment) OS=Homo sapiens OX=9606 GN=STAT6 PE=1 SV=2	0	14.492	5	3	3	3	797	88.8	6.35	1708		3		0	0		100		100		6.62708e-17		3.00121e-17						21.3			878.7	Not Found	Peak Found	Not Found	Not Found	High	1
FALSE	High	Master Protein	P32119	Peroxiredoxin-2 OS=Homo sapiens OX=9606 GN=PRDX2 PE=1 SV=5	0	14.479	15	3	19	2	198	21.9	5.97	7680		3		0	0	0.389	0.782	0.64	0.146	0.832631	0.862357	0.358189	0.735546	0	5.77	0	0	49.1	128.5	80.9	167.5	18.4	Peak Found	High	High	High	Peak Found	1
FALSE	High	Master Protein	P31944	Caspase-14 OS=Homo sapiens OX=9606 GN=CASP14 PE=1 SV=2	0	14.34	12	4	9	4	242	27.7	5.58	3489		4		0	0	0.154	0.164	0.231	0.164	0.372105	0.000316013	0.000111256	0.801017	115.88	7.32	64.8	145.47	63.7	76.1	91.8	286.2	33.3	Peak Found	Peak Found	Peak Found	High	Peak Found	1
FALSE	High	Master Protein	A0A087X1H5	Arf-GAP with coiled-coil, ANK repeat and PH domain-containing protein 2 OS=Homo sapiens OX=9606 GN=ACAP2 PE=1 SV=1	0	14.328	7	4	5	4	777	88	6.9	2066		4		0	0				100				3.00121e-17									900	Not Found	Not Found	Not Found	Not Found	High	1
FALSE	High	Master Protein	O75083	WD repeat-containing protein 1 OS=Homo sapiens OX=9606 GN=WDR1 PE=1 SV=4	0	14.32	12	6	14	6	606	66.2	6.65	3805		6		0	0	0.607	1.061	1.258	0.324	0.988291	0.997573	0.961396	0.927415	17.45	7.76	27.62	3.25	68.2	85.7	254.3	95.3	43.3	High	High	High	High	High	1
FALSE	High	Master Protein	G8JLG2	Corneodesmosin OS=Homo sapiens OX=9606 GN=CDSN PE=1 SV=1	0	14.17	13	5	9	5	529	51.6	8.44	3636		5		0	0	0.402	0.431	0.426	0.197	0.891446	0.167276	0.0303743	0.829886	12.75	0	0	49.38	66.1	27.3	24.8	138.5	56.1	Peak Found	Peak Found	Peak Found	High	High	1
FALSE	High	Master Protein	Q8TCJ2	Dolichyl-diphosphooligosaccharide--protein glycosyltransferase subunit STT3B OS=Homo sapiens OX=9606 GN=STT3B PE=1 SV=1	0	14.112	6	5	18	4	826	93.6	8.91	5505		5		0	1	1.021	1.054	1.138	0.454	0.999286	0.999591	0.99817	0.973026	61.24	24.67	7.99	33.85	78.5	114.5	194.5	159	14.5	Peak Found	High	High	Peak Found	High	1
FALSE	High	Master Protein	P60174	Triosephosphate isomerase OS=Homo sapiens OX=9606 GN=TPI1 PE=1 SV=4	0	14.083	24	5	9	5	249	26.7	6.9	2704		5		0	0	0.237	0.539	0.373	0.089	0.61334	0.381331	0.0116649	0.679647	31.54	21.9	60.01	12.29	48.6	126.3	118	247.3	14.9	Peak Found	Peak Found	Peak Found	High	Peak Found	1
FALSE	High	Master Protein	A0A494C0A8	Serine/threonine-protein kinase TBK1 OS=Homo sapiens OX=9606 GN=TBK1 PE=1 SV=1	0	14.077	9	4	4	4	551	62.5	6.86	1879		4		0	0	100	100	100	100	5.33141e-17	6.62708e-17	5.41217e-17	3.00121e-17					123.2	90.9	38.7		408.9	Peak Found	Peak Found	Peak Found	Not Found	High	1
FALSE	High	Master Protein	P10253	Lysosomal alpha-glucosidase OS=Homo sapiens OX=9606 GN=GAA PE=1 SV=4	0	14.071	6	5	19	5	952	105.3	6	5736		5		0	0	0.601	0.849	1.033	0.352	0.988291	0.931103	0.961396	0.941302	21.27	18.26	23.79	7.84	83.8	115.9	146.2	137.7	68.2	High	High	High	High	High	1
FALSE	High	Master Protein	Q9NS87	Kinesin-like protein KIF15 OS=Homo sapiens OX=9606 GN=KIF15 PE=1 SV=1	0	13.984	4	5	5	4	1388	160.1	6	1731		5		0	1		1.604	1.103	4.641		0.729541	0.982514	0.7596		0	0	0	88	77.8	207.9	16.7	319.3	Peak Found	Peak Found	Peak Found	Peak Found	High	1
FALSE	High	Master Protein	E9PS32	Sortilin-related receptor OS=Homo sapiens OX=9606 GN=SORL1 PE=1 SV=1	0	13.979	5	5	13	5	1060	118.4	5.62	3665		5		0	0	0.402	0.782	0.824	0.076	0.891446	0.862357	0.69914	0.590018	29.04	22.83	10.36	4.9	77.3	136.3	140.7	181.5	4	High	High	High	High	Peak Found	1
FALSE	High	Master Protein	Q9UP95	Solute carrier family 12 member 4 OS=Homo sapiens OX=9606 GN=SLC12A4 PE=1 SV=2	0	13.961	4	5	11	3	1085	120.6	6.44	4799		5		0	0	0.857	1.141	1.127	0.194	0.999286	0.986398	0.998113	0.811404	10.08	0.21	16.2	5.21	104.8	126.7	137.1	116.2	15.6	Peak Found	High	High	High	Peak Found	1
FALSE	High	Master Protein	Q2M389	WASH complex subunit 4 OS=Homo sapiens OX=9606 GN=WASHC4 PE=1 SV=2	0	13.926	4	6	15	6	1173	136.3	7.44	4769		6		0	0	0.618	0.957	1.062	0.13	0.988291	0.986398	0.975089	0.753347	70.54	16.78	29.59	10.67	113.3	134.6	117.1	142.9	13.5	Peak Found	High	High	High	Peak Found	1
FALSE	High	Master Protein	Q68CQ4	Digestive organ expansion factor homolog OS=Homo sapiens OX=9606 GN=DIEXF PE=1 SV=2	0	13.803	7	4	4	4	756	87	5.88	1830		4		0	0	100	100		100	5.33141e-17	6.62708e-17		3.00121e-17					24.6	15.3			832.1	Peak Found	Peak Found	Not Found	Not Found	High	1
FALSE	High	Master Protein	Q92542	Nicastrin OS=Homo sapiens OX=9606 GN=NCSTN PE=1 SV=2	0	13.714	7	5	17	5	709	78.4	5.99	5793		5		0	0	1.199	1.13	1.409	0.669	0.999286	0.986398	0.876294	0.987652	2.7	16.78	115.7	8.5	106.7	109.6	154.5	97.3	62.8	High	High	High	High	High	1
FALSE	High	Master Protein	Q13838	Spliceosome RNA helicase DDX39B OS=Homo sapiens OX=9606 GN=DDX39B PE=1 SV=1	0	13.706	12	5	14	1	428	49	5.67	4580		5		0	0	100			100	5.33141e-17			3.00121e-17					440.2				127.8	High	Not Found	Not Found	Not Found	Peak Found	1
FALSE	High	Master Protein	P85037	Forkhead box protein K1 OS=Homo sapiens OX=9606 GN=FOXK1 PE=1 SV=1	0	13.691	5	4	5	4	733	75.4	9.32	2676		4		0	0				100				3.00121e-17									900	Not Found	Not Found	Not Found	Not Found	High	1
FALSE	High	Master Protein	P11766	Alcohol dehydrogenase class-3 OS=Homo sapiens OX=9606 GN=ADH5 PE=1 SV=4	0	13.675	13	4	17	4	374	39.7	7.49	4397		4		0	0	0.645	1.123	0.805	0.334	0.999286	0.986398	0.662151	0.941302	14.73	9.21	1.86	7.03	91	167.3	76.5	139.1	47.3	High	High	High	High	High	1
FALSE	High	Master Protein	Q9UID3	Vacuolar protein sorting-associated protein 51 homolog OS=Homo sapiens OX=9606 GN=VPS51 PE=1 SV=2	0	13.6	7	5	6	5	782	86	6.47	1972		5		0	0	100	100	100	100	5.33141e-17	6.62708e-17	5.41217e-17	3.00121e-17					86.5	68.4	66.8		592.7	Peak Found	Peak Found	Peak Found	Not Found	High	1
FALSE	High	Master Protein	Q9P035	Very-long-chain (3R)-3-hydroxyacyl-CoA dehydratase 3 OS=Homo sapiens OX=9606 GN=HACD3 PE=1 SV=2	0	13.493	12	4	19	4	362	43.1	8.94	5584		4		0	0	1.251	0.988	1.039	0.501	0.999286	0.986398	0.963133	0.982616	42.95	36.25	52.61	33.15	125.5	98.9	105.9	97.8	54	High	High	High	High	High	1
FALSE	High	Master Protein	H0Y6W0	DNA topoisomerase (Fragment) OS=Homo sapiens OX=9606 GN=TOP3B PE=1 SV=1	0	13.278	11	5	12	5	525	59.3	8.1	2325		5		0	0	1.016	1.102	1.052	0.633	0.999286	0.986398	0.972863	0.984872	24.33	24.3	30.08	12.92	106.1	113.2	84.5	101.1	63	High	High	High	High	High	1
FALSE	High	Master Protein	Q05209	Tyrosine-protein phosphatase non-receptor type 12 OS=Homo sapiens OX=9606 GN=PTPN12 PE=1 SV=3	0	12.974	6	5	5	5	780	88.1	5.62	2096		5		0	0	100			100	5.33141e-17			3.00121e-17					35.2				672.6	Peak Found	Not Found	Not Found	Not Found	High	1
FALSE	High	Master Protein	Q8IZ21	Phosphatase and actin regulator 4 OS=Homo sapiens OX=9606 GN=PHACTR4 PE=1 SV=1	0	12.962	10	5	5	5	702	78.2	6.62	1728		5		0	0				100				3.00121e-17									900	Not Found	Not Found	Not Found	Not Found	High	1
FALSE	High	Master Protein	Q00325-2	Isoform B of Phosphate carrier protein, mitochondrial OS=Homo sapiens OX=9606 GN=SLC25A3	0	12.821	13	5	21	5	361	39.9	9.36	7422		5		0	0	0.885	1.175	1.06	0.58	0.999286	0.986398	0.974392	0.982616	10.53	6.87	21.43	24.19	105.6	133.1	122.2	112.9	64.6	High	High	High	High	High	1
FALSE	High	Master Protein	O75643	U5 small nuclear ribonucleoprotein 200 kDa helicase OS=Homo sapiens OX=9606 GN=SNRNP200 PE=1 SV=2	0	12.785	2	5	16	5	2136	244.4	6.06	6891		5		0	0	0.425	0.842	0.855	0.277	0.909358	0.92325	0.765415	0.899475	147.72	17.61	50.18	204.75	91.5	106.3	174.7	120.1	42.4	High	High	High	High	High	1
FALSE	High	Master Protein	Q96JC1	Vam6/Vps39-like protein OS=Homo sapiens OX=9606 GN=VPS39 PE=1 SV=2	0	12.784	8	5	16	5	886	101.7	6.99	3677		5		0	0	1.107	0.686	0.942	0.944	0.999286	0.712417	0.88221	0.984872	17.56	11.62	10.26	30.38	116.5	60.9	92.2	110	95.4	High	Peak Found	Peak Found	High	High	1
FALSE	High	Master Protein	A0A0U1RQV4	Non-specific serine/threonine protein kinase OS=Homo sapiens OX=9606 GN=ROCK1 PE=1 SV=1	0	12.688	5	5	7	3	1137	133	5.35	2222		5		0	0	0.01	1.044	1.196	0.01	5.33141e-17	0.997378	0.987625	3.00121e-17		17.01	6.52			210	258.7	209.5		Not Found	Peak Found	Peak Found	High	Not Found	1
FALSE	High	Master Protein	Q99661	Kinesin-like protein KIF2C OS=Homo sapiens OX=9606 GN=KIF2C PE=1 SV=2	0	12.661	5	3	3	2	725	81.3	7.83	1788		3		0	0				100				3.00121e-17									900	Not Found	Not Found	Not Found	Not Found	High	1
FALSE	High	Master Protein	Q6YHK3	CD109 antigen OS=Homo sapiens OX=9606 GN=CD109 PE=1 SV=2	0	12.651	4	5	22	5	1445	161.6	5.85	6342		5		0	0	0.661	1.003	0.978	2.169	0.999286	0.986398	0.92938	0.90445	26.34	28.32	20.21	0	74.4	130.2	118.1	132.9	47.9	High	High	Peak Found	High	Peak Found	1
FALSE	High	Master Protein	P62805	Histone H4 OS=Homo sapiens OX=9606 GN=H4C1 PE=1 SV=2	0	12.634	27	3	3	3	103	11.4	11.36	1811		3		0	0	1.375	18.835	1.029	0.01	0.977307	3.38166e-09	0.956009	3.00121e-17	0	69.43	0		29.7	744.7	22.2	30.4		Peak Found	High	Peak Found	Peak Found	Not Found	1
FALSE	High	Master Protein	Q14694	Ubiquitin carboxyl-terminal hydrolase 10 OS=Homo sapiens OX=9606 GN=USP10 PE=1 SV=2	0	12.604	5	3	3	3	798	87.1	5.31	1738		3		0	0	100	100	100	100	5.33141e-17	6.62708e-17	5.41217e-17	3.00121e-17					23.9	16.7	96.1		763.3	Peak Found	Peak Found	Peak Found	Not Found	High	1
FALSE	High	Master Protein	A0A590UJQ1	E3 ubiquitin-protein ligase OS=Homo sapiens OX=9606 GN=ITCH PE=1 SV=1	0	12.596	5	4	4	4	900	103.1	6.48	1637		4		0	0	0.01	0.01	0.01	21.973	5.33141e-17	6.62708e-17	5.41217e-17	0.404493				0				13.8	816.1	Not Found	Not Found	Not Found	Peak Found	High	1
FALSE	High	Master Protein	O15260	Surfeit locus protein 4 OS=Homo sapiens OX=9606 GN=SURF4 PE=1 SV=3	0	12.593	12	3	17	3	269	30.4	7.78	6363		3		0	0	0.485	0.856	0.287	0.3	0.962576	0.93603	0.00108796	0.913451	20.51	2.39	27.51	20.91	96.1	132.9	46.5	164.4	52.8	High	High	Peak Found	High	Peak Found	1
FALSE	High	Master Protein	Q01970	1-phosphatidylinositol 4,5-bisphosphate phosphodiesterase beta-3 OS=Homo sapiens OX=9606 GN=PLCB3 PE=1 SV=2	0	12.531	4	5	10	5	1234	138.7	5.9	3226		5		0	0	10.205	5.064	17.56	1.164	0.125411	0.00312956	8.71114e-09	0.828969	0	0	0	0	182.8	67.4	100	3.9	21.2	High	Peak Found	Peak Found	Peak Found	Peak Found	1
FALSE	High	Master Protein	P16278	Beta-galactosidase OS=Homo sapiens OX=9606 GN=GLB1 PE=1 SV=2	0	12.53	8	4	19	4	677	76	6.57	4341		4		0	0	1.266	0.881	1.01	0.929	0.999286	0.950576	0.932939	0.982616	5.12	17.56	31.66	25.73	136.9	73.1	91.2	76.6	89	High	High	High	High	High	1
FALSE	High	Master Protein	Q9UNX4	WD repeat-containing protein 3 OS=Homo sapiens OX=9606 GN=WDR3 PE=1 SV=1	0	12.458	4	4	4	4	943	106	6.64	1948		4		0	0	1.315	1.843		6.983	0.988291	0.526441		0.661402	0	0		0	137.5	39.3	13.9	16.9	364	Peak Found	Peak Found	Peak Found	Peak Found	High	1
FALSE	High	Master Protein	P46977	Dolichyl-diphosphooligosaccharide--protein glycosyltransferase subunit STT3A OS=Homo sapiens OX=9606 GN=STT3A PE=1 SV=2	0	12.455	5	4	18	3	705	80.5	8.07	6659		4		0	0	1.038	1.162	1.108	0.537	0.999286	0.986398	0.992532	0.982616	9.52	17.13	16.99	11.46	114.5	114.6	118.3	97.1	57.1	High	High	High	Peak Found	High	1
FALSE	High	Master Protein	A0A1B0GVD5	Cathepsin D OS=Homo sapiens OX=9606 GN=CTSD PE=1 SV=1	0	12.395	11	4	8	4	409	44.2	6.54	3258		4		0	0	0.102	0.34	0.135	0.01	0.205423	0.0519737	8.00156e-08	3.00121e-17	15.54	68.6	0		26.7	93.7	29.5	404.9		Peak Found	Peak Found	Peak Found	High	Not Found	1
FALSE	High	Master Protein	Q16778	Histone H2B type 2-E OS=Homo sapiens OX=9606 GN=H2BC21 PE=1 SV=3	0	12.357	21	3	6	3	126	13.9	10.32	3001		3		0	0	0.135	1.573	0.221	0.085	0.307632	0.751401	6.38177e-05	0.663663	5.85	73.43	58.48	6.5	37.8	403.6	53.8	251.5	19.9	Peak Found	High	Peak Found	High	Peak Found	1
FALSE	High	Master Protein	Q68EM7	Rho GTPase-activating protein 17 OS=Homo sapiens OX=9606 GN=ARHGAP17 PE=1 SV=1	0	12.135	5	4	4	4	881	95.4	7.62	1642		4		0	0		100	100	100		6.62708e-17	5.41217e-17	3.00121e-17						16.8	208		565.5	Not Found	Peak Found	Peak Found	Not Found	High	1
FALSE	High	Master Protein	O75165	DnaJ homolog subfamily C member 13 OS=Homo sapiens OX=9606 GN=DNAJC13 PE=1 SV=5	0	12.081	3	6	8	6	2243	254.3	6.74	2625		6		0	0	1.318	0.968	1.071	0.647	0.999286	0.986398	0.982514	0.984872	26.03	29.52	24.08	0	146.5	77	95	99.1	44.5	High	Peak Found	Peak Found	Peak Found	Peak Found	1
FALSE	High	Master Protein	P51610	Host cell factor 1 OS=Homo sapiens OX=9606 GN=HCFC1 PE=1 SV=2	0	12.051	2	4	4	4	2035	208.6	7.46	2014		4		0	0	0.557	0.914	1.305	1.015	0.977307	0.969073	0.961625	0.984872	0	0	0	0	58.8	85.8	122.6	93.9	278.8	Peak Found	Peak Found	Peak Found	Peak Found	High	1
FALSE	High	Master Protein	P04792	Heat shock protein beta-1 OS=Homo sapiens OX=9606 GN=HSPB1 PE=1 SV=2	0	12.039	22	4	5	4	205	22.8	6.4	1271		4		0	0	0.026	0.03	0.037	0.019	0.00893726	9.98545e-14	5.41217e-17	0.307143	0	33.13	68.55	0	5.9	9.9	17.5	724	3.5	Peak Found	Peak Found	Peak Found	High	Peak Found	1
FALSE	High	Master Protein	Q6ZN50	Oxysterol-binding protein OS=Homo sapiens OX=9606 GN=OSBP2 PE=1 SV=1	0	12.018	3	2	6	1	743	83.7	6.64	2656		2		0	0	100	100	100	100	5.33141e-17	6.62708e-17	5.41217e-17	3.00121e-17					122.3	77.3	40.9		391.8	Peak Found	Peak Found	Peak Found	Not Found	High	1
FALSE	High	Master Protein	A0A590UJW0	DNA mismatch repair protein Msh3 OS=Homo sapiens OX=9606 GN=MSH3 PE=1 SV=1	0	12.009	5	5	10	5	1081	122.2	7.47	2564		5		0	0	1.704	1.532	1.291	0.9	0.972405	0.797082	0.949586	0.982616	124	15.03	88.25	0	101.5	125.9	127.2	146.4	8.4	High	Peak Found	Peak Found	Peak Found	High	1
FALSE	High	Master Protein	Q70J99	Protein unc-13 homolog D OS=Homo sapiens OX=9606 GN=UNC13D PE=1 SV=1	0	11.943	3	4	7	3	1090	123.2	6.65	3082		4		0	0	100	100	100	100	5.33141e-17	6.62708e-17	5.41217e-17	3.00121e-17					136.3	63.7	353.5		178.6	Peak Found	Peak Found	Peak Found	Not Found	High	1
FALSE	High	Master Protein	Q6PKG0	La-related protein 1 OS=Homo sapiens OX=9606 GN=LARP1 PE=1 SV=2	0	11.872	3	4	4	4	1096	123.4	8.82	2007		4		0	0				100				3.00121e-17									876	Not Found	Not Found	Not Found	Not Found	High	1
FALSE	High	Master Protein	Q9UKM7	Endoplasmic reticulum mannosyl-oligosaccharide 1,2-alpha-mannosidase OS=Homo sapiens OX=9606 GN=MAN1B1 PE=1 SV=2	0	11.748	7	4	4	4	699	79.5	7.72	1568		4		0	0	3.109	2.431	1.982	3.828	0.658711	0.216826	0.556392	0.79108	36.43	25.52	0	41.82	147.3	130	54.8	39.9	197.7	Peak Found	Peak Found	Peak Found	Peak Found	High	1
FALSE	High	Master Protein	P02671	Fibrinogen alpha chain OS=Homo sapiens OX=9606 GN=FGA PE=1 SV=2	0	11.734	8	5	5	5	866	94.9	6.01	1481		5		0	0	1.241	3.716	5.246	0.97	0.999286	0.0246145	0.000240292	0.984872	0	0	0	0	49.4	147.8	208.6	240.3	38.6	Peak Found	Peak Found	Peak Found	High	Peak Found	1
FALSE	High	Master Protein	Q9UQ88	Cyclin-dependent kinase 11A OS=Homo sapiens OX=9606 GN=CDK11A PE=1 SV=4	0	11.725	5	4	4	4	783	91.3	5.36	1732		4		0	0			100	100			5.41217e-17	3.00121e-17							72.7		827.3	Not Found	Not Found	Peak Found	Not Found	High	1
FALSE	High	Master Protein	P54289	Voltage-dependent calcium channel subunit alpha-2/delta-1 OS=Homo sapiens OX=9606 GN=CACNA2D1 PE=1 SV=3	0	11.659	4	4	15	4	1103	124.5	5.27	5726		4		0	0	0.807	0.82	0.986	0.388	0.999286	0.896085	0.932017	0.961185	4.7	12.88	17.69	5.41	107.8	117.8	137.9	135.1	53.3	High	High	High	High	High	1
FALSE	High	Master Protein	G3V180	Dipeptidyl peptidase 3 OS=Homo sapiens OX=9606 GN=DPP3 PE=1 SV=1	0	11.65	5	4	6	4	757	84.3	5.03	2512		4		0	0	0.909	0.992	1.285	0.571	0.999286	0.986398	0.949586	0.982616	47.6	61.65	21.35	36.65	91.2	102	106.7	83.9	101	Peak Found	Peak Found	Peak Found	High	High	1
FALSE	High	Master Protein	Q68CZ2	Tensin-3 OS=Homo sapiens OX=9606 GN=TNS3 PE=1 SV=2	0	11.611	4	4	4	4	1445	155.2	6.81	1535		4		0	0	1.517	0.985	1.302	2.925	0.975228	0.986398	0.972863	0.838027	0	0	0	0	84.2	132.4	93.5	26.9	171.7	Peak Found	Peak Found	Peak Found	Peak Found	High	1
FALSE	High	Master Protein	A0A088AWN3	Dedicator of cytokinesis protein 9 OS=Homo sapiens OX=9606 GN=DOCK9 PE=1 SV=2	0	11.577	2	5	6	5	2081	237.8	7.4	2023		5		0	0	1.829	1.288	1.588	0.01	0.916708	0.939361	0.820862	3.00121e-17	3.91	18.19	43.12		131.1	93.3	101.2	45.5		Peak Found	High	Peak Found	Peak Found	Not Found	1
FALSE	High	Master Protein	Q9UHI6	Probable ATP-dependent RNA helicase DDX20 OS=Homo sapiens OX=9606 GN=DDX20 PE=1 SV=2	0	11.566	5	4	4	4	824	92.2	6.95	1677		4		0	0	100		100	100	5.33141e-17		5.41217e-17	3.00121e-17					27.9		24.6		847.5	Peak Found	Not Found	Peak Found	Not Found	High	1
FALSE	High	Master Protein	B4DR61	Protein transport protein Sec61 subunit alpha isoform 1 OS=Homo sapiens OX=9606 GN=SEC61A1 PE=1 SV=1	0	11.532	7	4	13	4	482	52.9	8.24	4852		4		0	0	1.029	1.641	1.009	0.643	0.999286	0.687722	0.949586	0.987652	5.01	13.34	18.53	32.32	107.6	152	98.8	97.6	46.8	High	High	Peak Found	High	High	1
FALSE	High	Master Protein	B8ZZS4	Ankyrin repeat and zinc finger domain-containing protein 1 OS=Homo sapiens OX=9606 GN=ANKZF1 PE=1 SV=1	0	11.503	7	3	3	3	516	57.5	9.54	1694		3		0	0				100				3.00121e-17									900	Not Found	Not Found	Not Found	Not Found	High	1
FALSE	High	Master Protein	Q16719	Kynureninase OS=Homo sapiens OX=9606 GN=KYNU PE=1 SV=1	0	11.486	13	5	7	5	465	52.3	7.03	1918		5		0	0	0.67	0.876	0.864	0.201	0.999286	0.948794	0.784839	0.836662	23.96	42.88	21.91	21.82	97.7	157	179.5	126.8	18.8	Peak Found	High	Peak Found	High	Peak Found	1
FALSE	High	Master Protein	O94906	Pre-mRNA-processing factor 6 OS=Homo sapiens OX=9606 GN=PRPF6 PE=1 SV=1	0	11.462	5	4	4	4	941	106.9	8.25	1398		4		0	0	100	100	100	100	5.33141e-17	6.62708e-17	5.41217e-17	3.00121e-17					73.3	101	54.2		634.6	Peak Found	Peak Found	Peak Found	Not Found	High	1
FALSE	High	Master Protein	P78362	SRSF protein kinase 2 OS=Homo sapiens OX=9606 GN=SRPK2 PE=1 SV=3	0	11.385	7	4	4	2	688	77.5	4.97	1706		4		0	0				100				3.00121e-17									900	Not Found	Not Found	Not Found	Not Found	High	1
FALSE	High	Master Protein	Q96GQ7	Probable ATP-dependent RNA helicase DDX27 OS=Homo sapiens OX=9606 GN=DDX27 PE=1 SV=2	0	11.269	7	5	5	5	796	89.8	9.28	1561		5		0	0				100				3.00121e-17									900	Not Found	Not Found	Not Found	Not Found	High	1
FALSE	High	Master Protein	Q9UJC3	Protein Hook homolog 1 OS=Homo sapiens OX=9606 GN=HOOK1 PE=1 SV=2	0	11.107	7	4	4	4	728	84.6	5.15	1324		4		0	0	100			100	5.33141e-17			3.00121e-17					50.9				716.9	Peak Found	Not Found	Not Found	Not Found	High	1
FALSE	High	Master Protein	Q14157-1	Isoform 2 of Ubiquitin-associated protein 2-like OS=Homo sapiens OX=9606 GN=UBAP2L	0	11.073	4	3	3	3	983	103.9	6.98	1306		3		0	0				100				3.00121e-17									900	Not Found	Not Found	Not Found	Not Found	High	1
FALSE	High	Master Protein	P25311	Zinc-alpha-2-glycoprotein OS=Homo sapiens OX=9606 GN=AZGP1 PE=1 SV=2	0	11.057	19	4	9	4	298	34.2	6.05	2037		4		0	0	0.586	0.607	0.523	0.594	0.985423	0.538133	0.109126	0.982616	18.23	43.48	50.54	0	90.8	141.1	55.2	131.8	67.9	High	Peak Found	Peak Found	High	Peak Found	1
FALSE	High	Master Protein	P98194	Calcium-transporting ATPase type 2C member 1 OS=Homo sapiens OX=9606 GN=ATP2C1 PE=1 SV=3	0	11.046	4	3	13	3	919	100.5	6.74	3362		3		0	0	0.768	0.971	1.194	0.953	0.999286	0.986398	0.994249	0.984872	3.09	16.25	4.52	5.07	97.9	95.9	115.8	135.6	119.8	High	High	High	High	High	1
FALSE	High	Master Protein	Q96L35	Receptor protein-tyrosine kinase OS=Homo sapiens OX=9606 GN=EPHB4 PE=1 SV=1	0	10.976	5	4	10	2	935	102.5	7.03	3059		4		0	0	1.69	0.999	0.804	1.214	0.916708	0.986398	0.75858	0.878375	41.64	36.69	49.04	14.58	127.6	74.5	61.9	70.2	86.7	High	Peak Found	Peak Found	Peak Found	High	1
FALSE	High	Master Protein	Q5JR04	RNA helicase OS=Homo sapiens OX=9606 GN=MOV10 PE=1 SV=1	0	10.924	5	5	11	5	947	107.1	8.79	2597		5		0	0	0.411	0.889	1.021	0.168	0.879944	0.950576	0.954707	0.802056	1.34	5.47	4	23.17	62.9	170.5	161.7	174.1	31.6	Peak Found	High	High	High	Peak Found	1
FALSE	High	Master Protein	Q96KP1	Exocyst complex component 2 OS=Homo sapiens OX=9606 GN=EXOC2 PE=1 SV=1	0	10.754	4	3	3	3	924	104	6.9	1443		3		0	0	100	100	100	100	5.33141e-17	6.62708e-17	5.41217e-17	3.00121e-17					46.8	41.4	146.2		665.6	Peak Found	Peak Found	Peak Found	Not Found	High	1
FALSE	High	Master Protein	Q9P253	Vacuolar protein sorting-associated protein 18 homolog OS=Homo sapiens OX=9606 GN=VPS18 PE=1 SV=2	0	10.707	4	4	9	4	973	110.1	6.07	3681		4		0	0	2.11	1.002	1.351	0.609	0.903614	0.986398	0.919134	0.984872	3.45	28.2	15.87	56.96	87.7	122.3	185.2	160.4	19.8	High	Peak Found	Peak Found	Peak Found	Peak Found	1
FALSE	High	Master Protein	H9KV28	Protein diaphanous homolog 1 OS=Homo sapiens OX=9606 GN=DIAPH1 PE=1 SV=2	0	10.681	4	5	14	5	1228	136.8	5.24	3613		5		0	0	12.815	5.973	4.475	0.776	0.0953466	0.00089311	0.00124085	0.982616	0.1	68.68	26.19	59.99	132.7	138.1	108.7	62.3	11.5	High	High	Peak Found	Peak Found	Peak Found	1
FALSE	High	Master Protein	Q92541	RNA polymerase-associated protein RTF1 homolog OS=Homo sapiens OX=9606 GN=RTF1 PE=1 SV=4	0	10.673	6	4	4	4	710	80.3	8.15	1578		4		0	0				100				3.00121e-17									900	Not Found	Not Found	Not Found	Not Found	High	1
FALSE	High	Master Protein	P08047	Transcription factor Sp1 OS=Homo sapiens OX=9606 GN=SP1 PE=1 SV=3	0	10.595	6	3	3	3	785	80.6	7.34	1226		3		0	0				100				3.00121e-17									900	Not Found	Not Found	Not Found	Not Found	High	1
FALSE	High	Master Protein	Q9NZB2	Constitutive coactivator of PPAR-gamma-like protein 1 OS=Homo sapiens OX=9606 GN=FAM120A PE=1 SV=2	0	10.542	5	4	4	4	1118	121.8	8.88	1250		4		0	0				100				3.00121e-17									900	Not Found	Not Found	Not Found	Not Found	High	1
FALSE	High	Master Protein	P05106	Integrin beta-3 OS=Homo sapiens OX=9606 GN=ITGB3 PE=1 SV=2	0	10.408	4	3	8	2	788	87	5.24	2987		3		0	0	0.582	1.006	0.83	0.229	0.977307	0.986398	0.738969	0.846236	5.56	4.96	18.77	0	84.4	146.1	120.5	145.5	18.1	Peak Found	High	Peak Found	Peak Found	Peak Found	1
FALSE	High	Master Protein	A0A087WYN9	ATP-dependent RNA helicase DHX29 OS=Homo sapiens OX=9606 GN=DHX29 PE=1 SV=1	0	10.332	3	4	12	3	1370	155.2	8.15	5427		4		0	0	0.974	1.323	1.693	0.074	0.999286	0.919083	0.589954	0.561597	0	0	0	0	129.6	137.2	159.5	79.6	17.1	High	Peak Found	High	Peak Found	Peak Found	1
FALSE	High	Master Protein	P31948	Stress-induced-phosphoprotein 1 OS=Homo sapiens OX=9606 GN=STIP1 PE=1 SV=1	0	10.259	9	5	16	5	543	62.6	6.8	4089		5		0	0	0.426	0.843	1.396	0.215	0.910113	0.92375	0.88221	0.847159	56	23.63	41.13	28.84	88.6	104.6	139.5	114.9	17.7	High	High	High	High	High	1
FALSE	High	Master Protein	Q96RP9	Elongation factor G, mitochondrial OS=Homo sapiens OX=9606 GN=GFM1 PE=1 SV=2	0	10.176	6	4	5	4	751	83.4	7.01	1388		4		0	0	1.388	0.828	1.762	3.139	0.977307	0.901569	0.753366	0.808581	10.35	48.4	20.92	25.54	117	88	97.8	54.7	294.7	Peak Found	Peak Found	Peak Found	Peak Found	High	1
FALSE	High	Master Protein	O75843	AP-1 complex subunit gamma-like 2 OS=Homo sapiens OX=9606 GN=AP1G2 PE=1 SV=1	0	10.17	5	4	5	4	785	87.1	6.55	2241		4		0	0	0.653	0.769	1.099	2.731	0.999286	0.850384	0.982194	0.865092	0	0	0	214.25	72.5	78.6	138.1	108.9	259.7	Peak Found	Peak Found	Peak Found	Peak Found	High	1
FALSE	High	Master Protein	O14936	Peripheral plasma membrane protein CASK OS=Homo sapiens OX=9606 GN=CASK PE=1 SV=3	0	10.17	4	3	5	3	926	105.1	6.43	2121		3		0	0	100	100	100	100	5.33141e-17	6.62708e-17	5.41217e-17	3.00121e-17					155.1	35.1	86.6		287.8	High	Peak Found	Peak Found	Not Found	High	1
FALSE	High	Master Protein	P51116	Fragile X mental retardation syndrome-related protein 2 OS=Homo sapiens OX=9606 GN=FXR2 PE=1 SV=2	0	10.16	4	3	3	3	673	74.2	6.23	1520		3		0	0	0.813	0.865	0.949	0.484	0.999286	0.939361	0.898226	0.980254	0	0	0	0	95.9	102.1	112	118	90.6	Peak Found	Peak Found	Peak Found	Peak Found	High	1
FALSE	High	Master Protein	Q08722	Leukocyte surface antigen CD47 OS=Homo sapiens OX=9606 GN=CD47 PE=1 SV=1	0	10.097	9	3	18	3	323	35.2	7.21	6554		3		0	0	0.62	1.053	1.056	0.599	0.989029	0.999106	0.972863	0.982616	18.26	18.24	0.41	72.77	75.4	134.3	135.5	127.1	70.1	High	High	High	High	High	1
FALSE	High	Master Protein	P43121	Cell surface glycoprotein MUC18 OS=Homo sapiens OX=9606 GN=MCAM PE=1 SV=2	0	9.939	5	3	7	3	646	71.6	5.76	1866		3		0	0	0.958	1.149	1.266	0.686	0.999286	0.986398	0.975089	0.999163	9.44	8.09	10.55	34.6	79.9	140.2	165.2	82.9	113.2	Peak Found	High	High	High	High	1
FALSE	High	Master Protein	Q7Z3C6	Autophagy-related protein 9A OS=Homo sapiens OX=9606 GN=ATG9A PE=1 SV=3	0	9.886	5	4	7	4	839	94.4	6.67	1904		4		0	0	1.573	1.5	1.731	1.998	0.962576	0.823079	0.711411	0.901534	107.64	50.59	54.75	171.32	117.7	120.3	108.7	78.9	217.8	Peak Found	High	Peak Found	High	High	1
FALSE	High	Master Protein	O14841	5-oxoprolinase OS=Homo sapiens OX=9606 GN=OPLAH PE=1 SV=3	0	9.845	5	4	6	4	1288	137.4	6.58	1343		4		0	0	0.769	0.918	0.942	0.01	0.999286	0.972784	0.898226	3.00121e-17	11.47	42.38	54.29		105.7	97.1	65.9	147.8		Peak Found	Peak Found	Peak Found	Peak Found	Not Found	1
FALSE	High	Master Protein	P28827	Receptor-type tyrosine-protein phosphatase mu OS=Homo sapiens OX=9606 GN=PTPRM PE=1 SV=2	0	9.604	4	4	15	4	1452	163.6	6.65	2968		4		0	0	0.688	0.974	0.993	0.278	0.999286	0.986398	0.932939	0.914421	18.95	31.67	20.54	60.66	93.2	117.5	130.2	134.7	32.8	High	High	High	High	High	1
FALSE	High	Master Protein	H7BY55	Complement decay-accelerating factor OS=Homo sapiens OX=9606 GN=CD55 PE=1 SV=2	0	9.601	5	3	10	3	550	58.9	8.78	3880		3		0	0	0.566	0.988	1.143	0.24	0.977769	0.986398	0.99817	0.865938	1.41	10.96	4.41	5.72	78.6	131.9	155.5	144.7	34.4	Peak Found	Peak Found	High	High	High	1
FALSE	High	Master Protein	Q07954	Prolow-density lipoprotein receptor-related protein 1 OS=Homo sapiens OX=9606 GN=LRP1 PE=1 SV=2	0	9.59	1	4	8	4	4544	504.3	5.39	2188		4		0	0	0.635	0.817	0.852	0.526	0.988291	0.894332	0.753366	0.984872	3.29	22.92	30.3	116.05	139.2	132.1	74.5	106	74.9	Peak Found	Peak Found	Peak Found	High	Peak Found	1
FALSE	High	Master Protein	A0A286YFM8	D-3-phosphoglycerate dehydrogenase (Fragment) OS=Homo sapiens OX=9606 GN=PHGDH PE=1 SV=1	0	9.473	13	3	9	3	239	25.6	7.58	3285		3		0	0	0.702	1.107	1.515	0.551	0.999286	0.986398	0.786889	0.987652	19.95	0.13	25.34	0.08	82.2	112.8	164.4	104.4	57.4	High	High	High	Peak Found	High	1
FALSE	High	Master Protein	Q14203	Dynactin subunit 1 OS=Homo sapiens OX=9606 GN=DCTN1 PE=1 SV=3	0	9.453	2	3	7	3	1278	141.6	5.81	2376		3		0	0	0.38	1.104	1.426		0.872556	0.986398	0.855726		0	0	0		64.4	184.6	216.6	133.4	5.1	High	High	High	Peak Found	High	1
FALSE	High	Master Protein	G5E9X3	Fibronectin type III domain containing 3A, isoform CRA_f OS=Homo sapiens OX=9606 GN=FNDC3A PE=1 SV=1	0	9.445	8	4	11	4	684	74.7	7.11	3220		4		0	0	0.595	0.893	1.187	0.086	0.986871	0.954197	0.987625	0.650841	9.72	19.65	8.97	12.41	96.2	147.8	119.6	182.9	13.7	High	High	High	High	Peak Found	1
FALSE	High	Master Protein	Q5XPI4	E3 ubiquitin-protein ligase RNF123 OS=Homo sapiens OX=9606 GN=RNF123 PE=1 SV=1	0	9.427	1	2	6	1	1314	148.4	6.74	4827		2		0	0	23.98	10.764	9.959	23.296	0.0224043	3.20035e-06	2.68254e-06	0.392276	0	0	0	0	213.7	95.9	88.7	8.9	207.6	High	Peak Found	Peak Found	Peak Found	High	1
FALSE	High	Master Protein	J3KNI1	Component of oligomeric Golgi complex 4 OS=Homo sapiens OX=9606 GN=COG4 PE=1 SV=1	0	9.412	5	3	3	3	789	89.4	5.21	1288		3		0	0				100				3.00121e-17									900	Not Found	Not Found	Not Found	Not Found	High	1
FALSE	High	Master Protein	P0DPA2	V-set and immunoglobulin domain-containing protein 8 OS=Homo sapiens OX=9606 GN=VSIG8 PE=2 SV=1	0	9.412	4	2	2	2	414	43.9	7.2	1447		2		0	0	0.01	66.648	0.01	0.01	5.33141e-17	6.62708e-17	5.41217e-17	3.00121e-17		0				885.2		8.7		Not Found	High	Not Found	Peak Found	Not Found	1
FALSE	High	Master Protein	Q7Z2K6	Endoplasmic reticulum metallopeptidase 1 OS=Homo sapiens OX=9606 GN=ERMP1 PE=1 SV=2	0	9.313	5	4	4	4	904	100.2	7.52	1111		4		0	0	0.681	0.936	1.006	0.3	0.999286	0.984536	0.944082	0.924835	8.37	16.83	7.43	9.24	83.6	139.4	110.7	143.8	36.2	Peak Found	High	Peak Found	Peak Found	Peak Found	1
FALSE	High	Master Protein	P31939	Bifunctional purine biosynthesis protein ATIC OS=Homo sapiens OX=9606 GN=ATIC PE=1 SV=3	0	9.231	9	4	8	4	592	64.6	6.71	2253		4		0	0	0.569	0.732	2.051	0.32	0.977307	0.810345	0.287812	0.937688	52.1	12.54	15.79	0	71	110.7	160.9	152.3	18.2	Peak Found	High	High	High	Peak Found	1
FALSE	High	Master Protein	P20936	Ras GTPase-activating protein 1 OS=Homo sapiens OX=9606 GN=RASA1 PE=1 SV=1	0	9.216	5	4	8	4	1047	116.3	6.54	1787		4		0	0	1.909	1.003	1.939	0.193	0.928961	0.986398	0.378374	0.808482	25.5	31.33	19.77	49.7	176.5	88.8	192.3	97.5	13.7	High	High	Peak Found	High	Peak Found	1
FALSE	High	Master Protein	A0A087X211	Protein CIP2A OS=Homo sapiens OX=9606 GN=CIP2A PE=1 SV=1	0	9.091	3	3	3	3	906	102.2	6.23	1339		3		0	0	1.208	1.245	1.131	2.154	0.999286	0.954197	0.988807	0.881694	0	0	0	0	108.3	119.3	47.9	42.4	278.6	Peak Found	Peak Found	Peak Found	Peak Found	High	1
FALSE	High	Master Protein	O43390	Heterogeneous nuclear ribonucleoprotein R OS=Homo sapiens OX=9606 GN=HNRNPR PE=1 SV=1	0	9.017	5	3	12	3	633	70.9	8.13	4107		3		0	0	1.631	1.802	0.58	0.649	0.977307	0.559342	0.23966	0.999163	59.84	55.45	75.01	49.7	148.6	92.6	108.5	57.9	63.2	High	High	Peak Found	Peak Found	High	1
FALSE	High	Master Protein	Q9NZQ3	NCK-interacting protein with SH3 domain OS=Homo sapiens OX=9606 GN=NCKIPSD PE=1 SV=1	0	8.994	4	3	5	3	722	78.9	6.38	2444		3		0	0	0.01	0.01	1.571	13.966	5.33141e-17	6.62708e-17	0.88991	0.425972			0	0			36.4	23.2	825.8	Not Found	Not Found	Peak Found	Peak Found	High	1
FALSE	High	Master Protein	Q29RF7	Sister chromatid cohesion protein PDS5 homolog A OS=Homo sapiens OX=9606 GN=PDS5A PE=1 SV=1	0	8.955	3	3	3	3	1337	150.7	7.91	930		3		0	0	2.081	1.954	0.01	0.974	0.832631	0.447634	5.41217e-17	0.876168	0	0		0	200.2	109		30.2	53.7	High	Peak Found	Not Found	Peak Found	Peak Found	1
FALSE	High	Master Protein	P48594	Serpin B4 OS=Homo sapiens OX=9606 GN=SERPINB4 PE=1 SV=2	0	8.931	8	3	3	1	390	44.8	6.21	1234		3		0	0	0.01	0.01	0.01	0.01	5.33141e-17	6.62708e-17	5.41217e-17	3.00121e-17								900		Not Found	Not Found	Not Found	High	Not Found	1
FALSE	High	Master Protein	P31946	14-3-3 protein beta/alpha OS=Homo sapiens OX=9606 GN=YWHAB PE=1 SV=3	0	8.92	11	3	8	1	246	28.1	4.83	3224		3		0	0	2.035	0.869	10.369	0.498	0.916708	0.943406	2.67626e-08	0.982616	0	0	0	0	60.1	25.7	306.4	29.5	14.7	Peak Found	High	Peak Found	Peak Found	Peak Found	1
FALSE	High	Master Protein	O14617	AP-3 complex subunit delta-1 OS=Homo sapiens OX=9606 GN=AP3D1 PE=1 SV=1	0	8.884	4	4	7	4	1153	130.1	8.48	1714		4		0	0	1.906	3.098	2.324	0.806	0.932665	0.0695383	0.157117	0.982616	9.22	9.15	16.62	18.01	135.7	225.8	170.8	73.6	43.1	High	High	Peak Found	Peak Found	Peak Found	1
FALSE	High	Master Protein	O14672	Disintegrin and metalloproteinase domain-containing protein 10 OS=Homo sapiens OX=9606 GN=ADAM10 PE=1 SV=1	0	8.87	5	3	6	3	748	84.1	7.77	1769		3		0	0	100	100	100	100	5.33141e-17	6.62708e-17	5.41217e-17	3.00121e-17					199	102.7	109.6		89.9	High	Peak Found	Peak Found	Not Found	High	1
FALSE	High	Master Protein	Q8NBN3	Transmembrane protein 87A OS=Homo sapiens OX=9606 GN=TMEM87A PE=1 SV=3	0	8.862	10	4	6	4	555	63.4	6.74	971		4		0	0	0.921	1.129	1.276	0.49	0.999286	0.986398	0.954599	0.982616	16.63	11.72	63.43	11.98	99.6	120.2	129.1	105.9	43.5	High	High	Peak Found	Peak Found	High	1
FALSE	High	Master Protein	P23396	40S ribosomal protein S3 OS=Homo sapiens OX=9606 GN=RPS3 PE=1 SV=2	0	8.837	18	4	7	4	243	26.7	9.66	1426		4		0	0	0.73	1.231	1.225	0.231	0.999286	0.966518	0.975089	0.862661	80.7	20.59	28.34	44.17	108.9	129.7	103.5	73.2	116.8	Peak Found	High	High	Peak Found	High	1
FALSE	High	Master Protein	P63165	Small ubiquitin-related modifier 1 OS=Homo sapiens OX=9606 GN=SUMO1 PE=1 SV=1	0	8.8	28	3	4	3	101	11.6	5.52	1973		3		0	0	1.092	1.253	1.222	0.343	0.999286	0.950576	0.976793	0.940202	102.43	46.49	46.58	1084.34	85.2	135	131.3	144.6	11.3	Peak Found	Peak Found	Peak Found	Peak Found	High	1
FALSE	High	Master Protein	Q92835	Phosphatidylinositol 3,4,5-trisphosphate 5-phosphatase 1 OS=Homo sapiens OX=9606 GN=INPP5D PE=1 SV=2	0	8.772	2	3	11	1	1189	133.2	7.59	5071		3		0	0	9.616	6.028	2.335	14.031	0.170087	0.000831363	0.321061	0.519603	0	0	0	0	141.1	88.4	34.3	14.7	205.9	High	High	Peak Found	Peak Found	High	1
FALSE	High	Master Protein	P24386	Rab proteins geranylgeranyltransferase component A 1 OS=Homo sapiens OX=9606 GN=CHM PE=1 SV=3	0	8.749	6	3	3	2	653	73.4	4.75	1149		3		0	1	3.291	1.71	2.691	2.008	0.688311	0.629085	0.0674438	0.927415	0	0	0	0	115.6	58.5	92.1	34.2	74.9	Peak Found	Not Found	Not Found	Not Found	High	1
FALSE	High	Master Protein	Q9Y4E8	Ubiquitin carboxyl-terminal hydrolase 15 OS=Homo sapiens OX=9606 GN=USP15 PE=1 SV=3	0	8.738	3	3	3	3	981	112.3	5.22	1088		3		0	0	100	100	100	100	5.33141e-17	6.62708e-17	5.41217e-17	3.00121e-17					215.8	112.9	26.4		316.2	Peak Found	Peak Found	Peak Found	Not Found	High	1
FALSE	High	Master Protein	A0A494C0G0	Tropomyosin alpha-3 chain (Fragment) OS=Homo sapiens OX=9606 GN=TPM3 PE=1 SV=1	0	8.613	31	2	3	2	87	9.9	5	1382		2		0	0	0.08	0.081	0.085	0.01	0.117987	1.83027e-07	3.65322e-11	3.00121e-17	0	0	89.87		29.4	29.8	40.5	519.9		Peak Found	Peak Found	Peak Found	High	Not Found	1
FALSE	High	Master Protein	P61981	14-3-3 protein gamma OS=Homo sapiens OX=9606 GN=YWHAG PE=1 SV=2	0	8.592	11	3	8	1	247	28.3	4.89	3092		3		0	1	0.056	0.193	0.125	0.034	0.0641438	0.00118566	2.51446e-08	0.437726	0	0	0	0	44.4	104.3	66.9	458.2	38.1	High	Peak Found	Peak Found	Not Found	Peak Found	1
FALSE	High	Master Protein	Q96DR8	Mucin-like protein 1 OS=Homo sapiens OX=9606 GN=MUCL1 PE=1 SV=1	0	8.539	18	2	5	2	90	9	4.64	3431		2		0	0	0.388	0.942	0.575	0.23	0.874614	0.986036	0.18075	0.864009	22.26	73.23	5.85	51.82	36.9	109.3	52	89	24.4	Peak Found	High	Peak Found	Peak Found	Peak Found	1
FALSE	High	Master Protein	J3KN16	Proteasome adapter and scaffold protein ECM29 OS=Homo sapiens OX=9606 GN=ECPAS PE=1 SV=1	0	8.513	2	3	12	3	2017	223.6	8.75	3642		3		0	0	8.129	6.198	4.269		0.212811	0.000658728	0.019694		0	0	0		188.2	139.8	78.9	14	19.8	High	High	Peak Found	Peak Found	Peak Found	1
FALSE	High	Master Protein	P30825	High affinity cationic amino acid transporter 1 OS=Homo sapiens OX=9606 GN=SLC7A1 PE=1 SV=1	0	8.504	3	2	5	2	629	67.6	5.43	1978		2		0	0	0.728	0.659	0.66	0.737	0.999286	0.648414	0.345224	0.988414	67.63	0	123.23	0	91.5	17.5	192.8	157.7	19.6	High	Peak Found	Peak Found	High	High	1
FALSE	High	Master Protein	Q14156	Protein EFR3 homolog A OS=Homo sapiens OX=9606 GN=EFR3A PE=1 SV=2	0	8.415	4	3	3	3	821	92.9	6.7	1166		3		0	0	0.738	1.266	1.632	3.341	0.999286	0.948802	0.803124	0.799281	15.66	11.05	44.66	6.73	67.6	107.5	134.8	85.9	276.8	Peak Found	Peak Found	Peak Found	Peak Found	High	1
FALSE	High	Master Protein	Q8TF72	Protein Shroom3 OS=Homo sapiens OX=9606 GN=SHROOM3 PE=1 SV=2	0	8.387	0	2	7	2	1996	216.7	7.8	4161		2		0	0	0.224	0.658	0.613	0.106	0.574357	0.646768	0.246236	0.723844	39.48	2.27	9.51	4.5	37.3	137	121.9	211	21.8	Peak Found	Peak Found	High	High	Peak Found	1
FALSE	High	Master Protein	Q02878	60S ribosomal protein L6 OS=Homo sapiens OX=9606 GN=RPL6 PE=1 SV=3	0	8.333	11	3	5	3	288	32.7	10.58	1678		3		0	0	0.558	1.066	0.943	0.227	0.977307	0.997378	0.896848	0.855255	9.2	27.2	6.67	14.24	84.4	152.7	147.9	151.7	24.4	High	High	Peak Found	High	Peak Found	1
FALSE	High	Master Protein	Q8WVV4-1	Isoform 1 of Protein POF1B OS=Homo sapiens OX=9606 GN=POF1B	0	8.329	6	3	4	3	595	68.7	6.35	1053		3		0	0	0.01	0.01	0.01	0.01	5.33141e-17	6.62708e-17	5.41217e-17	3.00121e-17								523.5		Not Found	Not Found	Not Found	High	Not Found	1
FALSE	High	Master Protein	O75054	Immunoglobulin superfamily member 3 OS=Homo sapiens OX=9606 GN=IGSF3 PE=2 SV=3	0	8.289	4	3	8	3	1194	135.1	6.07	1626		3		0	0	0.715	1.125	1.011	0.288	0.999286	0.986398	0.949586	0.914421	24.08	31.59	7.24	18.93	88.2	135.1	149.8	129.9	37.3	High	High	High	High	Peak Found	1
FALSE	High	Master Protein	A0A0U1RRL8	Spermatogenesis-associated protein 20 OS=Homo sapiens OX=9606 GN=SPATA20 PE=1 SV=1	0	8.2	4	3	8	3	786	88	7.27	1939		3		0	0	1.571	0.968	1.107	0.655	0.977307	0.986398	0.987625	0.999163	2.55	65.76	26.87	34.57	149.1	122.9	113.1	57.5	68.8	High	High	Peak Found	Peak Found	Peak Found	1
FALSE	High	Master Protein	P08133	Annexin A6 OS=Homo sapiens OX=9606 GN=ANXA6 PE=1 SV=3	0	8.165	6	4	6	4	673	75.8	5.6	1426		4		0	0	0.55	0.809	1.224	0.154	0.977307	0.887953	0.980772	0.756959	6.02	15.29	6.6	0.5	47.4	119.7	185.7	155.1	12.5	High	Peak Found	Peak Found	High	Peak Found	1
FALSE	High	Master Protein	B0QYK0	RNA-binding protein EWS OS=Homo sapiens OX=9606 GN=EWSR1 PE=1 SV=1	0	8.156	9	3	3	3	618	64.9	9.38	852		3		0	0				100				3.00121e-17									900	Not Found	Not Found	Not Found	Not Found	High	1
FALSE	High	Master Protein	P31151	Protein S100-A7 OS=Homo sapiens OX=9606 GN=S100A7 PE=1 SV=4	0	8.137	23	3	8	3	101	11.5	6.77	2188		3		0	0	0.16	0.829	0.216	0.075	0.394644	0.904439	5.02857e-05	0.635861	61.56	88.28	61.66	26.03	43.7	251.8	63.2	347.7	17.6	Peak Found	High	Peak Found	High	Peak Found	1
FALSE	High	Master Protein	O43493	Trans-Golgi network integral membrane protein 2 OS=Homo sapiens OX=9606 GN=TGOLN2 PE=1 SV=4	0	8.112	10	3	3	3	437	45.9	5.63	983		3		0	0	100	100	100	100	5.33141e-17	6.62708e-17	5.41217e-17	3.00121e-17					91.6	86.4	59.1		424.1	Peak Found	Peak Found	Peak Found	Not Found	High	1
FALSE	High	Master Protein	Q9HAV4	Exportin-5 OS=Homo sapiens OX=9606 GN=XPO5 PE=1 SV=1	0	8.034	4	4	4	4	1204	136.2	5.8	1024		4		0	0	100	100	100	100	5.33141e-17	6.62708e-17	5.41217e-17	3.00121e-17					95.6	166.2	64.8		324.3	Peak Found	Peak Found	Peak Found	Not Found	High	1
FALSE	High	Master Protein	E9PK25	Cofilin, non-muscle isoform OS=Homo sapiens OX=9606 GN=CFL1 PE=1 SV=1	0	7.997	16	3	8	2	204	22.7	8.34	2551		3		0	1	0.687	0.646	1.262	0.261	0.999286	0.619994	0.959149	0.892731	32.32	2.44	20.63	17.49	95	117	152.7	143.7	27	Peak Found	High	Peak Found	High	Peak Found	1
FALSE	High	Master Protein	A0A3B3ISQ4	Epidermal growth factor receptor kinase substrate 8-like protein 2 OS=Homo sapiens OX=9606 GN=EPS8L2 PE=1 SV=1	0	7.893	3	3	3	3	788	88	6.98	1384		3		0	0	100	100	100	100	5.33141e-17	6.62708e-17	5.41217e-17	3.00121e-17					73.7	109.3	54.8		587.7	Peak Found	Peak Found	Peak Found	Not Found	High	1
FALSE	High	Master Protein	P22735	Protein-glutamine gamma-glutamyltransferase K OS=Homo sapiens OX=9606 GN=TGM1 PE=1 SV=4	0	7.835	6	3	5	3	817	89.7	6.04	1313		3		0	0	0.01	0.368	0.265	0.01	5.33141e-17	0.0800039	0.000495687	3.00121e-17		0	0			68.7	49.4	514.7		Not Found	Peak Found	Peak Found	High	Not Found	1
FALSE	High	Master Protein	Q6P2E9	Enhancer of mRNA-decapping protein 4 OS=Homo sapiens OX=9606 GN=EDC4 PE=1 SV=1	0	7.801	2	2	2	2	1401	151.6	5.86	1066		2		0	0				100				3.00121e-17									900	Not Found	Not Found	Not Found	Not Found	High	1
FALSE	High	Master Protein	A0A087WYL5	Seizure 6-like protein 2 OS=Homo sapiens OX=9606 GN=SEZ6L2 PE=1 SV=1	0	7.655	4	3	11	3	923	99.1	4.87	3433		3		0	0	0.406	0.804	0.447	0.225	0.872556	0.879073	0.0438127	0.856565	26.52	26.38	121.91	43.86	47.6	167.1	88.1	194	27.9	High	High	Peak Found	High	Peak Found	1
FALSE	High	Master Protein	Q6PJG6	BRCA1-associated ATM activator 1 OS=Homo sapiens OX=9606 GN=BRAT1 PE=1 SV=2	0	7.62	3	3	3	3	821	88.1	5.27	1160		3		0	0				100				3.00121e-17									900	Not Found	Not Found	Not Found	Not Found	High	1
FALSE	High	Master Protein	I3L4X2	Multidrug resistance-associated protein 1 (Fragment) OS=Homo sapiens OX=9606 GN=ABCC1 PE=1 SV=1	0	7.543	2	3	6	3	1440	160.4	6.74	1772		3		0	0	1.424	1.392	1.431	0.562	0.993698	0.873487	0.919134	0.991862	21.65	5.93	0	44.71	139.8	137.8	85.6	72	57.2	Peak Found	High	Peak Found	Peak Found	High	1
FALSE	High	Master Protein	Q9UEY8	Gamma-adducin OS=Homo sapiens OX=9606 GN=ADD3 PE=1 SV=1	0	7.514	5	3	3	3	706	79.1	6.32	857		3		0	0	0.01	0.451	0.01	1.123	5.33141e-17	0.203791	5.41217e-17	0.964825		0		0		37.8		83.8	734.3	Not Found	Peak Found	Not Found	Peak Found	High	1
FALSE	High	Master Protein	Q5T6F2	Ubiquitin-associated protein 2 OS=Homo sapiens OX=9606 GN=UBAP2 PE=1 SV=1	0	7.49	2	2	2	2	1119	117	7.34	1025		2		0	0				100				3.00121e-17									900	Not Found	Not Found	Not Found	Not Found	High	1
FALSE	High	Master Protein	Q9H1I8	Activating signal cointegrator 1 complex subunit 2 OS=Homo sapiens OX=9606 GN=ASCC2 PE=1 SV=3	0	7.489	2	2	2	2	757	86.3	5.16	1225		2		0	0				100				3.00121e-17									900	Not Found	Not Found	Not Found	Not Found	High	1
FALSE	High	Master Protein	O60306	RNA helicase aquarius OS=Homo sapiens OX=9606 GN=AQR PE=1 SV=4	0	7.475	1	2	5	2	1485	171.2	6.37	1967		2		0	0	0.42	0.786	1.075	0.01	0.895302	0.862357	0.975089	3.00121e-17	0	0.48	12.62		55.3	141.5	186.3	179.8		Peak Found	High	High	High	Not Found	1
FALSE	High	Master Protein	J3KSD8	Bleomycin hydrolase (Fragment) OS=Homo sapiens OX=9606 GN=BLMH PE=1 SV=8	0	7.45	9	3	3	3	262	30.2	7.46	833		3		0	0	0.449	0.459	0.767	0.136	0.903614	0.219141	0.566554	0.735546	9.96	16.9	38.52	0.31	73.4	84.9	79.2	169.5	19.1	Peak Found	High	Peak Found	Peak Found	Peak Found	1
FALSE	High	Master Protein	Q9C075	Keratin, type I cytoskeletal 23 OS=Homo sapiens OX=9606 GN=KRT23 PE=1 SV=2	0	7.408	7	3	4	2	422	48.1	6.54	1148		3		0	0	0.01	0.069	0.01	0.056	5.33141e-17	2.92379e-08	5.41217e-17	0.437594		0		0		23		519.3	10.5	Not Found	Peak Found	Not Found	High	Peak Found	1
FALSE	High	Master Protein	P58107	Epiplakin OS=Homo sapiens OX=9606 GN=EPPK1 PE=1 SV=3	0	7.383	2	3	12	2	5088	555.3	5.62	3692		3		0	0	0.158			0.12	0.293698			0.678874	0			0	103.8	16.7	614.2	17.8	33.7	Peak Found	Peak Found	High	High	High	1
FALSE	High	Master Protein	Q5VW36	Focadhesin OS=Homo sapiens OX=9606 GN=FOCAD PE=1 SV=1	0	7.355	2	3	11	3	1801	199.9	6.62	2655		3		0	0	0.26	0.642	1.018	0.031	0.650409	0.613252	0.954599	0.280056	13.27	46.49	33.02	0	53.1	135	150.8	220.5	3.2	Peak Found	High	High	High	Peak Found	1
FALSE	High	Master Protein	A0A087WUV8	Basigin OS=Homo sapiens OX=9606 GN=BSG PE=1 SV=1	0	7.324	19	3	6	3	189	20.5	6.68	1541		3		0	0	0.478	0.857	0.719	0.116	0.922629	0.936193	0.46016	0.633792	0	16.27	60.96	0	30.7	96	259.1	113.1	7.4	Peak Found	Peak Found	High	High	Peak Found	1
FALSE	High	Master Protein	A0A087WYN0	Transporter OS=Homo sapiens OX=9606 GN=SLC6A6 PE=1 SV=1	0	7.314	6	2	6	2	460	52	9.38	2457		2		0	0	0.786	0.995	1.089	0.39	0.999286	0.986398	0.976793	0.971083	26.43	3.42	18.52	1.09	97.7	121.2	134.1	121.6	47.4	Peak Found	High	Peak Found	High	High	1
FALSE	High	Master Protein	P51659	Peroxisomal multifunctional enzyme type 2 OS=Homo sapiens OX=9606 GN=HSD17B4 PE=1 SV=3	0	7.288	4	2	2	2	736	79.6	8.84	865		2		0	0	1.367	1.706	1.611	2.342	0.977307	0.631927	0.842821	0.799487	0	0	0	0	112	154.7	87.4	54.2	226.4	Peak Found	Peak Found	Peak Found	Peak Found	High	1
FALSE	High	Master Protein	Q8N766	ER membrane protein complex subunit 1 OS=Homo sapiens OX=9606 GN=EMC1 PE=1 SV=1	0	7.269	4	4	4	4	993	111.7	7.66	1011		4		0	0		1.267		1.755		0.948794		0.941302		0		0	56.2	133.8	194.7	31.8	286.1	Peak Found	High	Peak Found	Peak Found	High	1
FALSE	High	Master Protein	Q14644	Ras GTPase-activating protein 3 OS=Homo sapiens OX=9606 GN=RASA3 PE=1 SV=3	0	7.138	2	2	7	1	834	95.6	7.15	2608		2		0	0	1.398	0.702	1.095	0.677	0.977307	0.746219	0.983536	0.978466	0	0	0	0	130.9	65.7	102.5	93.7	63.4	Peak Found	Peak Found	Peak Found	Peak Found	High	1
FALSE	High	Master Protein	Q4KMP7	TBC1 domain family member 10B OS=Homo sapiens OX=9606 GN=TBC1D10B PE=1 SV=3	0	7.106	3	2	2	2	808	87.1	9.19	1070		2		0	0				100				3.00121e-17									900	Not Found	Not Found	Not Found	Not Found	High	1
FALSE	High	Master Protein	O60216	Double-strand-break repair protein rad21 homolog OS=Homo sapiens OX=9606 GN=RAD21 PE=1 SV=2	0	7.1	5	3	3	3	631	71.6	4.65	1109		3		0	0				100				3.00121e-17									900	Not Found	Not Found	Not Found	Not Found	High	1
FALSE	High	Master Protein	P41250	Glycine--tRNA ligase OS=Homo sapiens OX=9606 GN=GARS1 PE=1 SV=3	0	7.096	4	3	13	3	739	83.1	7.03	4493		3		0	0	0.829	0.954	1.193	0.902	0.999286	0.986398	0.987625	0.993457	8.5	6.31	18.71	61.22	107.6	130.8	104.4	136.6	117.5	Peak Found	High	Peak Found	High	High	1
FALSE	High	Master Protein	Q96P47	Arf-GAP with GTPase, ANK repeat and PH domain-containing protein 3 OS=Homo sapiens OX=9606 GN=AGAP3 PE=1 SV=2	0	7.095	4	3	3	3	875	95	7.97	781		3		0	0				100				3.00121e-17									900	Not Found	Not Found	Not Found	Not Found	High	1
FALSE	High	Master Protein	C9JJV6	Myeloid-associated differentiation marker (Fragment) OS=Homo sapiens OX=9606 GN=MYADM PE=1 SV=8	0	7.033	23	2	16	2	146	15.9	8.65	4141		2		0	0	0.782	0.799	0.591	0.39	0.999286	0.873487	0.206196	0.971083	19.99	4.91	96.66	0	112.6	109.1	118.7	134.5	38.3	High	High	High	High	High	1
FALSE	High	Master Protein	Q9C0I1	Myotubularin-related protein 12 OS=Homo sapiens OX=9606 GN=MTMR12 PE=1 SV=2	0	7.003	4	3	3	3	747	86.1	6.62	1030		3		0	0	2.387	2.625	3.152	6.207	0.590867	0.15465	0.153575	0.580033	0	0	0	0	91.4	155.8	93.9	20.6	424.4	Peak Found	Peak Found	Peak Found	Peak Found	High	1
FALSE	High	Master Protein	G3V220	Transcription elongation regulator 1 OS=Homo sapiens OX=9606 GN=TCERG1 PE=1 SV=1	0	6.999	2	2	3	2	1032	116.1	8.46	1351		2		0	0		100		100		6.62708e-17		3.00121e-17						53			847	Not Found	Peak Found	Not Found	Not Found	High	1
FALSE	High	Master Protein	Q16777	Histone H2A type 2-C OS=Homo sapiens OX=9606 GN=H2AC20 PE=1 SV=4	0	6.993	12	2	7	2	129	14	10.9	2586		2		0	0	0.386	0.786	0.38	0.178	0.872556	0.862357	0.0132648	0.808871	156.13	183.84	110.55	126.73	75.7	150.2	80.7	337	36.4	High	High	Peak Found	High	Peak Found	1
FALSE	High	Master Protein	Q99808	Equilibrative nucleoside transporter 1 OS=Homo sapiens OX=9606 GN=SLC29A1 PE=1 SV=3	0	6.948	4	2	10	2	456	50.2	8.29	2996		2		0	0	0.769	0.475	0.96	0.257	0.999286	0.252844	0.891231	0.878523	19.92	0	12.15	31.55	117.8	31	151.4	155.2	42.1	High	High	Peak Found	High	High	1
FALSE	High	Master Protein	P0DP25	Calmodulin-3 OS=Homo sapiens OX=9606 GN=CALM3 PE=1 SV=1	0	6.946	15	2	2	1	149	16.8	4.22	1059		2		0	0	0.01	0.09	0.093	0.01	5.33141e-17	6.77935e-07	1.67354e-09	3.00121e-17		0	0			58.3	59.9	647.1		Not Found	Peak Found	Peak Found	High	Not Found	1
FALSE	High	Master Protein	A0A3B3ITN8	Retinoic acid-induced protein 3 OS=Homo sapiens OX=9606 GN=GPRC5A PE=1 SV=1	0	6.897	6	2	7	2	339	38.2	7.94	2559		2		0	0	0.955	1.394	1.178	0.567	0.999286	0.873487	0.991887	0.988392	28.78	26.05	12.45	51.83	99	144.7	123.2	106.1	59.2	High	High	High	High	High	1
FALSE	High	Master Protein	Q6P2Q9	Pre-mRNA-processing-splicing factor 8 OS=Homo sapiens OX=9606 GN=PRPF8 PE=1 SV=2	0	6.893	1	4	7	4	2335	273.4	8.84	1712		4		0	0	0.774	1.032	1.003	1.093	0.999286	0.996923	0.944014	0.982616	62.64	51.07	31.96	89.06	86.7	124.5	128.6	129.5	96.8	High	High	Peak Found	High	Peak Found	1
FALSE	High	Master Protein	Q63ZY3	KN motif and ankyrin repeat domain-containing protein 2 OS=Homo sapiens OX=9606 GN=KANK2 PE=1 SV=1	0	6.87	4	3	3	3	851	91.1	5.63	1004		3		0	0				100				3.00121e-17									900	Not Found	Not Found	Not Found	Not Found	High	1
FALSE	High	Master Protein	Q96CN9	GRIP and coiled-coil domain-containing protein 1 OS=Homo sapiens OX=9606 GN=GCC1 PE=1 SV=1	0	6.861	3	2	3	2	775	87.8	5.45	1068		2		0	0	0.01	0.01	0.01	2.739	5.33141e-17	6.62708e-17	5.41217e-17	0.743116				0				94.1	744.4	Not Found	Not Found	Not Found	Peak Found	High	1
FALSE	High	Master Protein	P12270	Nucleoprotein TPR OS=Homo sapiens OX=9606 GN=TPR PE=1 SV=3	0	6.824	1	3	5	3	2363	267.1	5.02	1067		3		0	0	0.133	0.926	1.019	0.01	0.220542	0.979573	0.936954	3.00121e-17	0	0	0		102.8	196.6	179.8	120.4		High	High	High	Peak Found	Not Found	1
FALSE	High	Master Protein	Q8ND24	RING finger protein 214 OS=Homo sapiens OX=9606 GN=RNF214 PE=1 SV=2	0	6.813	4	3	3	3	703	77.6	6.95	902		3		0	0	0.883	0.762	1.102	0.478	0.999883	0.840159	0.985562	0.982616	0	0	0	0	72.4	62.4	90.3	81.9	276.2	Peak Found	Peak Found	Peak Found	Peak Found	High	1
FALSE	High	Master Protein	Q7Z460	CLIP-associating protein 1 OS=Homo sapiens OX=9606 GN=CLASP1 PE=1 SV=1	0	6.788	2	3	3	3	1538	169.3	9.03	1057		3		0	0	100	100	100	100	5.33141e-17	6.62708e-17	5.41217e-17	3.00121e-17					26.6	29.6	285.4		416.9	Peak Found	Peak Found	Peak Found	Not Found	High	1
FALSE	High	Master Protein	Q96S59	Ran-binding protein 9 OS=Homo sapiens OX=9606 GN=RANBP9 PE=1 SV=1	0	6.781	4	3	3	3	729	77.8	6.79	963		3		0	0				100				3.00121e-17									854.9	Not Found	Not Found	Not Found	Not Found	High	1
FALSE	High	Master Protein	Q9H4Z3	mRNA (2'-O-methyladenosine-N(6)-)-methyltransferase OS=Homo sapiens OX=9606 GN=PCIF1 PE=1 SV=1	0	6.769	5	2	2	2	704	80.6	7.42	740		2		0	0		100		100		6.62708e-17		3.00121e-17						169.9			730.1	Not Found	Peak Found	Not Found	Not Found	High	1
FALSE	High	Master Protein	P10599	Thioredoxin OS=Homo sapiens OX=9606 GN=TXN PE=1 SV=3	0	6.766	10	1	4	1	105	11.7	4.92	1474		1		0	0	0.15	0.241	0.146	0.094	0.358986	0.0060981	2.70703e-07	0.689259	0	0	0	0	35.5	56.9	34.5	236.4	22.1	Peak Found	Peak Found	Peak Found	High	Peak Found	1
FALSE	High	Master Protein	Q99805	Transmembrane 9 superfamily member 2 OS=Homo sapiens OX=9606 GN=TM9SF2 PE=1 SV=1	0	6.713	4	2	6	2	663	75.7	7.44	1914		2		0	0	1.23	0.693	0.823	0.493	0.999286	0.729723	0.685139	0.984872	67.68	120.58	142.7	2.32	140.1	92.4	118.1	104.1	51.3	High	High	Peak Found	Peak Found	High	1
FALSE	High	Master Protein	P46459	Vesicle-fusing ATPase OS=Homo sapiens OX=9606 GN=NSF PE=1 SV=3	0	6.699	4	3	3	3	744	82.5	6.95	1022		3		0	0			0.01	3.029			5.41217e-17	0.71928				0	126.1	26.2		17.5	244.2	Peak Found	Peak Found	Not Found	Peak Found	Peak Found	1
FALSE	High	Master Protein	H7BXH2	Serine/threonine-protein phosphatase 6 regulatory subunit 3 OS=Homo sapiens OX=9606 GN=PPP6R3 PE=1 SV=1	0	6.628	3	2	2	2	827	92.4	4.63	957		2		0	0	26.916	2.5	43.697	22.232	0.0162736	0.191154	5.41217e-17	0.403762	0	0	0	0	124.7	11.6	202.4	4.6	108.1	Peak Found	Peak Found	Peak Found	Peak Found	High	1
FALSE	High	Master Protein	Q96P63	Serpin B12 OS=Homo sapiens OX=9606 GN=SERPINB12 PE=1 SV=1	0	6.568	6	2	4	2	405	46.2	5.53	1457		2		0	0	0.427	0.587	0.877	0.01	0.891446	0.488317	0.786889	3.00121e-17	0	46.12	32.6		20.6	100.6	143.1	148.3		Peak Found	Peak Found	Peak Found	High	Not Found	1
FALSE	High	Master Protein	Q9H3K2	Growth hormone-inducible transmembrane protein OS=Homo sapiens OX=9606 GN=GHITM PE=1 SV=2	0	6.56	9	3	4	3	345	37.2	9.94	1142		3		0	0	0.638	1.082	0.561	0.285	0.988291	0.993597	0.166358	0.909921	7.11	5.57	64.6	8.14	101.8	173	57.2	101.3	55.6	Peak Found	Peak Found	Peak Found	Peak Found	Peak Found	1
FALSE	High	Master Protein	Q93050-1	Isoform 2 of V-type proton ATPase 116 kDa subunit a1 OS=Homo sapiens OX=9606 GN=ATP6V0A1	0	6.538	3	3	4	3	831	95.7	6.65	1262		3		0	0	1.401	1.127	1.211	1.621	0.984715	0.986398	0.998113	0.880271	0	0	0	0	165.7	47.4	141.1	42.1	169.6	Peak Found	Peak Found	Peak Found	Peak Found	High	1
FALSE	High	Master Protein	Q13557	Calcium/calmodulin-dependent protein kinase type II subunit delta OS=Homo sapiens OX=9606 GN=CAMK2D PE=1 SV=3	0	6.533	3	2	2	1	499	56.3	7.25	1097		2		0	0	4.61	1.905	0.01	8.293	0.304889	0.477977	5.41217e-17	0.494597	0	0		0	160.1	66.2		34.7	288.1	High	Peak Found	Not Found	Peak Found	Peak Found	1
FALSE	High	Master Protein	M0QZK8	Gamma-glutamylcyclotransferase OS=Homo sapiens OX=9606 PE=4 SV=1	0	6.526	20	2	2	2	103	11.6	4.92	682		2		0	0	0.28	0.553	0.464	0.111	0.643939	0.414745	0.0524933	0.689596	51.38	19.52	11.82	0	58.7	101.8	83.2	172.1	14	Peak Found	Peak Found	Peak Found	Peak Found	Peak Found	1
FALSE	High	Master Protein	P80723	Brain acid soluble protein 1 OS=Homo sapiens OX=9606 GN=BASP1 PE=1 SV=2	0	6.521	23	3	6	3	227	22.7	4.63	1103		3		0	0	0.378	0.883	1.213	0.353	0.872556	0.950576	0.983169	0.941386	54.6	42.22	26.28	7.96	92.2	101.6	143.5	143.3	50.1	High	High	Peak Found	High	Peak Found	1
FALSE	High	Master Protein	Q9UQ80	Proliferation-associated protein 2G4 OS=Homo sapiens OX=9606 GN=PA2G4 PE=1 SV=3	0	6.501	8	3	10	3	394	43.8	6.55	2064		3		0	0	0.461	0.941	1.17	0.01	0.905609	0.985987	0.99817	3.00121e-17	11.53	21.14	9.9		78.7	145.7	151.9	168.3		Peak Found	High	High	High	High	1
FALSE	High	Master Protein	Q13835	Plakophilin-1 OS=Homo sapiens OX=9606 GN=PKP1 PE=1 SV=2	0	6.476	3	2	3	2	747	82.8	9.13	1138		2		0	0	0.077	0.854	0.135	0.01	0.0701734	0.934564	2.80078e-07	3.00121e-17	0	99.72	0		16	156.6	28.2	246.8		Peak Found	Peak Found	Peak Found	High	Not Found	1
FALSE	High	Master Protein	P62937	Peptidyl-prolyl cis-trans isomerase A OS=Homo sapiens OX=9606 GN=PPIA PE=1 SV=2	0	6.418	21	3	5	3	165	18	7.81	1462		3		0	0	0.369	1.12	0.414	0.202	0.856155	0.986398	0.0246064	0.812822	29.46	10.94	107.46	4.49	67.4	191.9	141	181	22	Peak Found	High	Peak Found	High	Peak Found	1
FALSE	High	Master Protein	P00505	Aspartate aminotransferase, mitochondrial OS=Homo sapiens OX=9606 GN=GOT2 PE=1 SV=3	0	6.417	6	2	4	2	430	47.5	9.01	1372		2		0	0	0.75	0.808	1.218	0.315	0.999286	0.885662	0.991887	0.943738	12.07	65.36	0.09	15.27	96.5	107.2	154.8	127	40.7	Peak Found	Peak Found	High	Peak Found	Peak Found	1
FALSE	High	Master Protein	P26374	Rab proteins geranylgeranyltransferase component A 2 OS=Homo sapiens OX=9606 GN=CHML PE=1 SV=2	0	6.396	3	2	3	1	656	74	4.93	1266		2		0	0				100				3.00121e-17									900	Not Found	Not Found	Not Found	Not Found	High	1
FALSE	High	Master Protein	O15066	Kinesin-like protein KIF3B OS=Homo sapiens OX=9606 GN=KIF3B PE=1 SV=1	0	6.348	3	2	3	1	747	85.1	7.69	1381		2		0	0	100			100	5.33141e-17			3.00121e-17					267.7				308.1	Peak Found	Not Found	Not Found	Not Found	High	1
FALSE	High	Master Protein	O95487	Protein transport protein Sec24B OS=Homo sapiens OX=9606 GN=SEC24B PE=1 SV=2	0	6.341	2	2	4	1	1268	137.3	6.67	1296		2		0	0	100	100	100	100	5.33141e-17	6.62708e-17	5.41217e-17	3.00121e-17					242.6	43.5	127.5		56.1	High	Peak Found	Peak Found	Not Found	Peak Found	1
FALSE	High	Master Protein	A0A3B3IU30	Unconventional myosin-Ig OS=Homo sapiens OX=9606 GN=MYO1G PE=1 SV=1	0	6.325	2	2	12	1	967	110.5	8.69	5108		2		0	0	0.619	0.499	0.389	0.01	0.985423	0.293214	0.048049	3.00121e-17	0	0	0		119.4	96.2	74.9	192.7		Peak Found	Peak Found	Peak Found	High	Not Found	1
FALSE	High	Master Protein	Q9GZT8	NIF3-like protein 1 OS=Homo sapiens OX=9606 GN=NIF3L1 PE=1 SV=2	0	6.303	2	2	11	1	377	41.9	6.65	5452		2		0	0	100	100	100		5.33141e-17	6.62708e-17	5.41217e-17						87.9	13.2	389.9			High	Peak Found	High	Not Found	Not Found	1
FALSE	High	Master Protein	Q8WVC0	RNA polymerase-associated protein LEO1 OS=Homo sapiens OX=9606 GN=LEO1 PE=1 SV=1	0	6.27	3	2	3	2	666	75.4	4.51	1467		2		0	0		100		100		6.62708e-17		3.00121e-17						63.6			836.4	Not Found	Peak Found	Not Found	Not Found	High	1
FALSE	High	Master Protein	O00459	Phosphatidylinositol 3-kinase regulatory subunit beta OS=Homo sapiens OX=9606 GN=PIK3R2 PE=1 SV=2	0	6.269	2	2	4	2	728	81.5	6.43	1627		2		0	0	0.379	1.184	1.076	0.083	0.872556	0.985667	0.984404	0.661402	0	0	0	0	56.2	175.3	159.3	148.1	17.4	Peak Found	High	Peak Found	Peak Found	High	1
FALSE	High	Master Protein	Q5M775	Cytospin-B OS=Homo sapiens OX=9606 GN=SPECC1 PE=1 SV=1	0	6.248	3	3	3	3	1068	118.5	6.7	764		3		0	0	0.882	0.908	0.01	7.467	0.999286	0.966518	5.41217e-17	0.472405	0	0		0	40.9	62.6		46.4	554.2	Peak Found	Peak Found	Not Found	Peak Found	High	1
FALSE	High	Master Protein	P05783	Keratin, type I cytoskeletal 18 OS=Homo sapiens OX=9606 GN=KRT18 PE=1 SV=2	0	6.24	5	2	12	1	430	48	5.45	7404		2		0	0	1.354	0.777	0.706	0.436	0.977307	0.858154	0.606521	0.984872	0	0	0	0	161.4	92.7	84.2	119.2	52	High	Peak Found	Peak Found	Peak Found	Peak Found	1
FALSE	High	Master Protein	Q9BPX5	Actin-related protein 2/3 complex subunit 5-like protein OS=Homo sapiens OX=9606 GN=ARPC5L PE=1 SV=1	0	6.21	9	2	4	1	153	16.9	6.6	2704		2		0	0	100		100	100	5.33141e-17		5.41217e-17	3.00121e-17					118.2		416.9		137.8	Peak Found	Not Found	Peak Found	Not Found	Peak Found	1
FALSE	High	Master Protein	P27482	Calmodulin-like protein 3 OS=Homo sapiens OX=9606 GN=CALML3 PE=1 SV=2	0	6.087	13	2	2	1	149	16.9	4.42	931		2		0	1	0.01	0.366	0.538	0.01	5.33141e-17	0.0774846	0.129366	3.00121e-17		291.23	0			88.4	155.8	330.6		Not Found	High	Not Found	Peak Found	Not Found	1
FALSE	High	Master Protein	P52948	Nuclear pore complex protein Nup98-Nup96 OS=Homo sapiens OX=9606 GN=NUP98 PE=1 SV=4	0	6.074	1	3	3	3	1817	197.5	6.4	1099		3		0	0				100				3.00121e-17									900	Not Found	Not Found	Not Found	Not Found	High	1
FALSE	High	Master Protein	Q7Z2T5	TRMT1-like protein OS=Homo sapiens OX=9606 GN=TRMT1L PE=1 SV=2	0	6.055	3	2	2	2	733	81.7	7.88	761		2		0	0				100				3.00121e-17									900	Not Found	Not Found	Not Found	Not Found	High	1
FALSE	High	Master Protein	F8WF33	PRA1 family protein OS=Homo sapiens OX=9606 GN=ARL6IP5 PE=1 SV=1	0	6.044	19	2	13	2	93	10.2	5.78	2899		2		0	0	0.882	1.023	1.174	0.424	0.999286	0.991659	0.991887	0.971083	23.77	3.45	27.82	23.08	106.3	109.5	115	108.5	50.9	High	High	High	High	High	1
FALSE	High	Master Protein	O15294	UDP-N-acetylglucosamine--peptide N-acetylglucosaminyltransferase 110 kDa subunit OS=Homo sapiens OX=9606 GN=OGT PE=1 SV=3	0	6.031	3	3	8	3	1046	116.9	6.7	1761		3		0	0	0.772	1.104	1.327	0.271	0.999286	0.986398	0.92938	0.907925	2.47	15.25	23.83	0	84.6	140.9	183.2	132.5	12.2	High	High	High	Peak Found	High	1
FALSE	High	Master Protein	Q9UBG0	C-type mannose receptor 2 OS=Homo sapiens OX=9606 GN=MRC2 PE=1 SV=2	0	6.015	2	2	7	2	1479	166.6	5.83	953		2		0	0	0.362	0.854	1.203	0.085	0.821957	0.93297	0.994249	0.5474	12.27	22.23	2.11	0	61.2	144.9	204	169.5	6.7	Peak Found	High	High	High	Peak Found	1
FALSE	High	Master Protein	A0A1W2PQR6	Lysosome membrane protein 2 OS=Homo sapiens OX=9606 GN=SCARB2 PE=1 SV=1	0	5.994	5	2	7	2	449	51	5.16	1426		2		0	0	0.742	0.766	1.138	0.319	0.999286	0.84561	0.993395	0.94193	4.43	62.59	33.58	31.15	91.4	107.5	147.5	122.5	41.2	High	High	Peak Found	High	Peak Found	1
FALSE	High	Master Protein	Q9NXC5	GATOR complex protein MIOS OS=Homo sapiens OX=9606 GN=MIOS PE=1 SV=2	0	5.951	3	2	2	2	875	98.5	6.73	868		2		0	0				100				3.00121e-17									900	Not Found	Not Found	Not Found	Not Found	High	1
FALSE	High	Master Protein	Q8WUX1	Sodium-coupled neutral amino acid transporter 5 OS=Homo sapiens OX=9606 GN=SLC38A5 PE=1 SV=1	0	5.93	4	2	8	2	472	51.4	8.21	3164		2		0	0	1.562	1.176	1.388	1	0.977307	0.986398	0.88991	0.984872	62.62	55.71	25.03	120.32	121.8	92.7	117.5	92.1	76.4	High	High	High	High	Peak Found	1
FALSE	High	Master Protein	P25789	Proteasome subunit alpha type-4 OS=Homo sapiens OX=9606 GN=PSMA4 PE=1 SV=1	0	5.901	9	3	4	3	261	29.5	7.72	1135		3		0	0	1.362	0.783	1.088	0.283	0.999286	0.862357	0.987625	0.904138	10.78	56.99	11.3	0	116.4	117.4	103.5	98.2	21.9	High	Peak Found	Peak Found	High	Peak Found	1
FALSE	High	Master Protein	P84243	Histone H3.3 OS=Homo sapiens OX=9606 GN=H3-3A PE=1 SV=2	0	5.849	15	3	3	3	136	15.3	11.27	987		3		0	0	0.279	0.96		0.993	0.705386	0.986398		0.982616	27.92	245.19		0	59.4	460.6	26.5	127.5	45.3	Peak Found	High	Peak Found	High	Peak Found	1
FALSE	High	Master Protein	F5H1T9	Keratin-associated protein 2-1 OS=Homo sapiens OX=9606 GN=KRTAP2-1 PE=4 SV=1	0	5.723	8	1	1	1	124	13	7.81	683		1		0	0																		Not Found	Not Found	Not Found	Not Found	Not Found	1
FALSE	High	Master Protein	P06576	ATP synthase subunit beta, mitochondrial OS=Homo sapiens OX=9606 GN=ATP5F1B PE=1 SV=3	0	5.703	7	2	2	2	529	56.5	5.4	539		2		0	0	0.01	0.01	0.01	0.01	5.33141e-17	6.62708e-17	5.41217e-17	3.00121e-17								752.2		Not Found	Not Found	Not Found	High	Not Found	1
FALSE	High	Master Protein	C9J3F6	TBC1 domain family member 5 OS=Homo sapiens OX=9606 GN=TBC1D5 PE=1 SV=1	0	5.703	4	2	2	2	593	67.5	7.8	737		2		0	0				100				3.00121e-17									900	Not Found	Not Found	Not Found	Not Found	High	1
FALSE	High	Master Protein	A0A494C1S7	General transcription factor 3C polypeptide 3 OS=Homo sapiens OX=9606 GN=GTF3C3 PE=1 SV=1	0	5.698	4	2	2	2	631	71.4	4.73	800		2		0	0	100		100	100	5.33141e-17		5.41217e-17	3.00121e-17					67		111.9		661.6	Peak Found	Not Found	Peak Found	Not Found	High	1
FALSE	High	Master Protein	P21926	CD9 antigen OS=Homo sapiens OX=9606 GN=CD9 PE=1 SV=4	0	5.679	7	2	5	2	228	25.4	7.15	1949		2		0	0	0.747	1.599	1.055	0.465	0.999286	0.731678	0.960707	0.982616	0	0	0	0	106.7	168.1	113.7	89.3	78.6	High	Peak Found	Peak Found	Peak Found	High	1
FALSE	High	Master Protein	Q13438	Protein OS-9 OS=Homo sapiens OX=9606 GN=OS9 PE=1 SV=1	0	5.673	2	2	2	2	667	75.5	4.87	951		2		0	0				100				3.00121e-17									900	Not Found	Not Found	Not Found	Not Found	High	1
FALSE	High	Master Protein	Q6V1X1	Dipeptidyl peptidase 8 OS=Homo sapiens OX=9606 GN=DPP8 PE=1 SV=1	0	5.652	3	2	2	2	898	103.3	5.8	769		2		0	0	100	100		100	5.33141e-17	6.62708e-17		3.00121e-17					223.9	85.5			201.6	Peak Found	Peak Found	Not Found	Not Found	High	1
FALSE	High	Master Protein	Q8TEM1	Nuclear pore membrane glycoprotein 210 OS=Homo sapiens OX=9606 GN=NUP210 PE=1 SV=3	0	5.599	1	2	4	2	1887	205	6.81	943		2		0	0	0.282	0.601	1.043	0.01	0.643939	0.520281	0.954707	3.00121e-17	55.56	18.94	9.88		66.5	128.2	212.4	206.1		Peak Found	Peak Found	High	High	Not Found	1
FALSE	High	Master Protein	B1ANE3	Methionine synthase (Fragment) OS=Homo sapiens OX=9606 GN=MTR PE=1 SV=1	0	5.553	2	2	3	2	819	91.7	5.76	1136		2		0	0	7.976	5.019	0.01	0.01	0.104175	0.00334	5.41217e-17	3.00121e-17	0	0			198.8	155.9		13.1		High	Peak Found	Not Found	Peak Found	Not Found	1
FALSE	High	Master Protein	Q15477	Helicase SKI2W OS=Homo sapiens OX=9606 GN=SKIV2L PE=1 SV=3	0	5.549	1	2	8	1	1246	137.7	6.06	5426		2		0	0	100	100		100	5.33141e-17	6.62708e-17		3.00121e-17					202.9	123.9			37.9	Peak Found	Peak Found	Not Found	Not Found	Peak Found	1
FALSE	High	Master Protein	O95573	Long-chain-fatty-acid--CoA ligase 3 OS=Homo sapiens OX=9606 GN=ACSL3 PE=1 SV=3	0	5.544	3	2	4	2	720	80.4	8.38	1255		2		0	0	1.132	1.086	1.188	0.78	0.999286	0.991659	0.99817	0.982359	26.7	31.46	20.54	0	119.9	115.7	125	104.1	40.8	High	Peak Found	Peak Found	Peak Found	Peak Found	1
FALSE	High	Master Protein	Q7L099	Protein RUFY3 OS=Homo sapiens OX=9606 GN=RUFY3 PE=1 SV=1	0	5.542	3	2	2	1	469	52.9	5.49	1017		2		0	0	100				5.33141e-17								284.6					High	Not Found	Not Found	Not Found	Not Found	1
FALSE	High	Master Protein	A0A494C0P1	Glucocorticoid receptor OS=Homo sapiens OX=9606 GN=NR3C1 PE=1 SV=1	0	5.529	4	2	2	2	746	82.3	6.61	593		2		0	0				100				3.00121e-17									900	Not Found	Not Found	Not Found	Not Found	High	1
FALSE	High	Master Protein	Q8TEQ6	Gem-associated protein 5 OS=Homo sapiens OX=9606 GN=GEMIN5 PE=1 SV=3	0	5.497	3	3	5	3	1508	168.5	6.62	789		3		0	0	0.612	1.391	0.362	0.203	0.977769	0.873487	0.021781	0.82455	0	0	0	0	108.4	186.3	48.4	133.9	72.2	High	Peak Found	Peak Found	Peak Found	High	1
FALSE	High	Master Protein	F6RFD5	Actin-depolymerizing factor OS=Homo sapiens OX=9606 GN=DSTN PE=1 SV=1	0	5.492	12	2	3	1	135	15.4	8.59	1092		2		0	0	0.745	0.097	0.551	0.168	0.999286	1.62794e-06	0.146614	0.792321	0	0	0	0	170.9	22.3	126.4	229.3	38.5	Peak Found	Peak Found	Peak Found	Peak Found	Peak Found	1
FALSE	High	Master Protein	Q96B97	SH3 domain-containing kinase-binding protein 1 OS=Homo sapiens OX=9606 GN=SH3KBP1 PE=1 SV=2	0	5.478	4	2	2	2	665	73.1	6.62	702		2		0	0				100				3.00121e-17									900	Not Found	Not Found	Not Found	Not Found	High	1
FALSE	High	Master Protein	X6RLX0	ELKS/Rab6-interacting/CAST family member 1 OS=Homo sapiens OX=9606 GN=ERC1 PE=1 SV=1	0	5.46	2	2	3	2	1120	128.4	5.97	779		2		0	0	100	100		100	5.33141e-17	6.62708e-17		3.00121e-17					163.7	133.9			64.6	High	Peak Found	Not Found	Not Found	Peak Found	1
FALSE	High	Master Protein	A0A2R8Y6J3	60S ribosomal protein L5 (Fragment) OS=Homo sapiens OX=9606 GN=RPL5 PE=1 SV=1	0	5.453	16	3	11	3	238	27	9.13	2981		3		0	0	0.68	1.308	1.078	0.633	0.999286	0.931283	0.979006	0.991325	16.26	21.4	0	15.87	109.6	154.1	87.3	118.9	68.1	High	High	Peak Found	High	High	1
FALSE	High	Master Protein	A0A0A0MRB5	MAP kinase-activating death domain protein OS=Homo sapiens OX=9606 GN=MADD PE=1 SV=1	0	5.438	1	2	3	2	1588	176.4	6.13	1431		2		0	0				100				3.00121e-17									900	Not Found	Not Found	Not Found	Not Found	High	1
FALSE	High	Master Protein	P63104	14-3-3 protein zeta/delta OS=Homo sapiens OX=9606 GN=YWHAZ PE=1 SV=1	0	5.436	9	2	6	1	245	27.7	4.79	1997		2		0	0	0.316	1.047	0.627	0.01	0.673432	0.997378	0.360205	3.00121e-17	0	0	0		62.4	206.6	123.7	197.3		Peak Found	Peak Found	Peak Found	High	Not Found	1
FALSE	High	Master Protein	Q9BXS9	Solute carrier family 26 member 6 OS=Homo sapiens OX=9606 GN=SLC26A6 PE=1 SV=1	0	5.421	3	2	2	2	759	82.9	8.37	685		2		0	0	0.583	0.938	2.217	1.286	0.977307	0.985667	0.373903	0.901018	0	49.58	0	68.5	47	116.4	178.9	97.4	99.9	Peak Found	Peak Found	Peak Found	Peak Found	High	1
FALSE	High	Master Protein	Q92922	SWI/SNF complex subunit SMARCC1 OS=Homo sapiens OX=9606 GN=SMARCC1 PE=1 SV=3	0	5.363	2	2	2	2	1105	122.8	5.76	808		2		0	0	100	100	100	100	5.33141e-17	6.62708e-17	5.41217e-17	3.00121e-17					52	38.6	82		661.7	Peak Found	Peak Found	Peak Found	Not Found	High	1
FALSE	High	Master Protein	P35030	Trypsin-3 OS=Homo sapiens OX=9606 GN=PRSS3 PE=1 SV=2	0	5.358	3	1	7	1	304	32.5	7.49	1755		1		0	0	0.795	2.413	1.105	0.332	0.999286	0.222432	0.991887	0.939406	65.3	14.84	56.54	0	62.9	227.4	89.5	100.8	28.4	Peak Found	High	Peak Found	Peak Found	Peak Found	1
FALSE	High	Master Protein	P05109	Protein S100-A8 OS=Homo sapiens OX=9606 GN=S100A8 PE=1 SV=1	0	5.336	24	2	3	2	93	10.8	7.03	801		2		0	0	1.081	0.683	1.25	0.274	0.999286	0.703712	0.963611	0.901304	16.45	24.13	8.1	21.53	132.3	82.3	150.3	120.6	33	High	Peak Found	Peak Found	High	Peak Found	1
FALSE	High	Master Protein	Q32MZ4	Leucine-rich repeat flightless-interacting protein 1 OS=Homo sapiens OX=9606 GN=LRRFIP1 PE=1 SV=2	0	5.297	3	2	2	2	808	89.2	4.65	636		2		0	0				100				3.00121e-17									900	Not Found	Not Found	Not Found	Not Found	High	1
FALSE	High	Master Protein	P38435	Vitamin K-dependent gamma-carboxylase OS=Homo sapiens OX=9606 GN=GGCX PE=1 SV=2	0	5.28	4	2	4	2	758	87.5	8.02	1119		2		0	0	1.087	0.66	0.897	0.792	0.999286	0.649465	0.815856	0.999163	0	0	0	0	119.5	12.4	247.3	18.8	143.9	High	Peak Found	Peak Found	Peak Found	High	1
FALSE	High	Master Protein	Q02224	Centromere-associated protein E OS=Homo sapiens OX=9606 GN=CENPE PE=1 SV=2	0	5.272	1	2	4	1	2701	316.2	5.64	1153		2		0	0	0.475	0.859	0.354	0.01	0.916708	0.93852	0.0248401	3.00121e-17	0	0	0		75.4	136.3	56.3	158.7		Peak Found	Peak Found	Peak Found	High	Not Found	1
FALSE	High	Master Protein	P26641	Elongation factor 1-gamma OS=Homo sapiens OX=9606 GN=EEF1G PE=1 SV=3	0	5.254	3	2	3	2	437	50.1	6.67	1248		2		0	0	0.559	1.09	0.703		0.972633	0.98875	0.606521		0	0	0		65	150.5	81.7	116.2	162.3	High	Peak Found	Peak Found	Peak Found	High	1
FALSE	High	Master Protein	A6NE01	Protein FAM186A OS=Homo sapiens OX=9606 GN=FAM186A PE=2 SV=3	0	5.251	0	1	15	1	2351	262.6	8.6	7339		1		0	0	0.135	0.764	0.579	0.01	0.307632	0.844149	0.187151	3.00121e-17	0	0	0	0	34.5	195.8	148.4	256.2	2.1	High	High	High	High	Peak Found	1
FALSE	High	Master Protein	F5H282	T-complex protein 1 subunit alpha OS=Homo sapiens OX=9606 GN=TCP1 PE=1 SV=1	0	5.22	3	1	4	1	332	36.4	7.02	2124		1		0	0	0.986	0.97	1.227	0.01	0.999286	0.986398	0.991887	3.00121e-17	0	0	0		101.1	99.5	125.8	102.5		High	Peak Found	Peak Found	Peak Found	Not Found	1
FALSE	High	Master Protein	O95197	Reticulon-3 OS=Homo sapiens OX=9606 GN=RTN3 PE=1 SV=2	0	5.212	1	1	7	1	1032	112.5	4.96	4371		1		0	0	0.978	1.506	0.655	0.557	0.999286	0.820052	0.332437	0.982616	0	0	0	0	103	158.6	69	105.3	58.7	High	High	Peak Found	High	High	1
FALSE	High	Master Protein	P31639	Sodium/glucose cotransporter 2 OS=Homo sapiens OX=9606 GN=SLC5A2 PE=1 SV=1	0	5.167	1	1	13	1	672	72.8	7.47	9121		1		0	0	12.69	4.974	3.953	19.645	0.0972669	0.00356925	0.00392165	0.431865	0	0	0	0	152.8	59.9	47.6	12	236.5	High	High	High	High	High	1
FALSE	High	Master Protein	Q9BU23	Lipase maturation factor 2 OS=Homo sapiens OX=9606 GN=LMF2 PE=1 SV=2	0	5.163	3	2	2	2	707	79.6	10.1	825		2		0	0	1.025	1.134	1.742	0.629	0.999286	0.986398	0.61017	0.999163	1.62	4.79	9.69	25.56	97.4	106.6	162.7	94.8	57.8	High	Peak Found	Peak Found	Peak Found	Peak Found	1
FALSE	High	Master Protein	Q8WZ42	Titin OS=Homo sapiens OX=9606 GN=TTN PE=1 SV=4	0	5.14	0	2	8	1	34350	3813.7	6.35	3541		2		0	0	2.534	1.977	1.639	1.519	0.832081	0.434618	0.695223	0.964825	0	0	0	0	157.5	122.9	101.9	62.2	94.4	Peak Found	High	High	Peak Found	Peak Found	1
FALSE	High	Master Protein	O00418	Eukaryotic elongation factor 2 kinase OS=Homo sapiens OX=9606 GN=EEF2K PE=1 SV=2	0	5.131	3	2	2	2	725	82.1	5.33	714		2		0	0				100				3.00121e-17									900	Not Found	Not Found	Not Found	Not Found	High	1
FALSE	High	Master Protein	F8VZX2	Poly(rC)-binding protein 2 OS=Homo sapiens OX=9606 GN=PCBP2 PE=1 SV=1	0	5.118	6	2	2	2	321	33.8	8.24	699		2		0	0	100	100	100	100	5.33141e-17	6.62708e-17	5.41217e-17	3.00121e-17					90.1	141.6	152.8		214.4	Peak Found	Peak Found	Peak Found	Not Found	High	1
FALSE	High	Master Protein	P50443	Sulfate transporter OS=Homo sapiens OX=9606 GN=SLC26A2 PE=1 SV=2	0	5.1	3	2	6	2	739	81.6	8.38	1343		2		0	0	0.911	0.656	1.038	0.444	0.999286	0.640467	0.956888	0.982616	12.85	36.48	29.09	37.65	110.2	84	130.2	118.4	57	Peak Found	High	Peak Found	High	Peak Found	1
FALSE	High	Master Protein	Q9C0C2	182 kDa tankyrase-1-binding protein OS=Homo sapiens OX=9606 GN=TNKS1BP1 PE=1 SV=4	0	5.083	2	2	2	2	1729	181.7	4.86	540		2		0	0				100				3.00121e-17									900	Not Found	Not Found	Not Found	Not Found	High	1
FALSE	High	Master Protein	A0A494C1M4	10-formyltetrahydrofolate dehydrogenase OS=Homo sapiens OX=9606 GN=ALDH1L2 PE=1 SV=1	0	5.066	3	3	4	3	932	102.8	6.57	1154		3		0	0	100		100	100	5.33141e-17		5.41217e-17	3.00121e-17					49		62.8		694.5	Peak Found	Not Found	Peak Found	Not Found	High	1
FALSE	High	Master Protein	P52630	Signal transducer and activator of transcription 2 OS=Homo sapiens OX=9606 GN=STAT2 PE=1 SV=1	0	5.012	4	2	2	2	851	97.9	5.49	676		2		0	0	100	100	100		5.33141e-17	6.62708e-17	5.41217e-17						135.8	104.3	33.5			Peak Found	Peak Found	Peak Found	Not Found	Not Found	1
FALSE	High	Master Protein	O94966	Ubiquitin carboxyl-terminal hydrolase 19 OS=Homo sapiens OX=9606 GN=USP19 PE=1 SV=2	0	4.992	3	3	3	3	1318	145.6	6.28	750		3		0	0				100				3.00121e-17									900	Not Found	Not Found	Not Found	Not Found	High	1
FALSE	High	Master Protein	F8W809	Thioredoxin-disulfide reductase OS=Homo sapiens OX=9606 GN=TXNRD1 PE=1 SV=1	0	4.99	4	2	4	2	498	54.6	6.47	1038		2		0	0	0.512	1.482	1.047	0.761	0.962576	0.826764	0.954599	0.999163	35.54	8.57	1.88	291.55	65.4	177	126.1	120.2	227.7	Peak Found	High	Peak Found	High	Peak Found	1
FALSE	High	Master Protein	Q8N3C0	Activating signal cointegrator 1 complex subunit 3 OS=Homo sapiens OX=9606 GN=ASCC3 PE=1 SV=3	0	4.963	1	2	4	2	2202	251.3	7.09	1273		2		0	0	0.891	0.864	2.866	0.01	0.999286	0.939361	0.0418038	3.00121e-17	154.55	0	125.08		106.4	53.3	316.9	99.7		Peak Found	High	High	High	Not Found	1
FALSE	High	Master Protein	P15531	Nucleoside diphosphate kinase A OS=Homo sapiens OX=9606 GN=NME1 PE=1 SV=1	0	4.96	14	2	6	2	152	17.1	6.19	1841		2		0	0	0.353	1.012	0.663	0.082	0.791314	0.986398	0.376896	0.534996	0	13.82	0	0	51	218	95.6	220.8	11.8	Peak Found	High	Peak Found	High	Peak Found	1
FALSE	High	Master Protein	P13498	Cytochrome b-245 light chain OS=Homo sapiens OX=9606 GN=CYBA PE=1 SV=3	0	4.931	11	2	3	2	195	21	9.54	1154		2		0	0	0.789	1.501	1.098	0.477	0.999286	0.822502	0.983738	0.984872	0	0	0	0	56.5	107.5	78.7	71.6	96.2	Peak Found	Peak Found	Peak Found	Peak Found	Peak Found	1
FALSE	High	Master Protein	O00299	Chloride intracellular channel protein 1 OS=Homo sapiens OX=9606 GN=CLIC1 PE=1 SV=4	0	4.926	8	2	4	2	241	26.9	5.17	1537		2		0	0	0.42	1.027	1.049	0.01	0.872556	0.993884	0.960956	3.00121e-17	0	0	0		88	166.5	197.7	93.4		Peak Found	High	High	Peak Found	Not Found	1
FALSE	High	Master Protein	Q9P265	Disco-interacting protein 2 homolog B OS=Homo sapiens OX=9606 GN=DIP2B PE=1 SV=3	0	4.917	1	2	7	2	1576	171.4	8.09	2254		2		0	0	1.328	1.526	1.421	0.363	0.986955	0.80174	0.92938	0.971083	0	0	0	0	134.6	138.4	141.1	63.4	33.3	High	Peak Found	High	High	Peak Found	1
FALSE	High	Master Protein	P51798	H(+)/Cl(-) exchange transporter 7 OS=Homo sapiens OX=9606 GN=CLCN7 PE=1 SV=2	0	4.789	2	2	4	2	805	88.6	8.43	1165		2		0	0	1.731	1.622	1.204	1.671	0.965675	0.710179	0.993395	0.960121	126.02	73.84	0	293.73	115.5	88.4	32.8	44.2	197.7	Peak Found	High	Peak Found	High	Peak Found	1
FALSE	High	Master Protein	Q6P3X3	Tetratricopeptide repeat protein 27 OS=Homo sapiens OX=9606 GN=TTC27 PE=1 SV=1	0	4.788	3	2	2	2	843	96.6	5.59	409		2		0	0				100				3.00121e-17									745.8	Not Found	Not Found	Not Found	Not Found	High	1
FALSE	High	Master Protein	A0A2U3TZL8	Kinesin-like protein OS=Homo sapiens OX=9606 GN=KIF23 PE=1 SV=1	0	4.781	3	2	2	2	810	92.6	7.96	844		2		0	0	1.114	1.266	1.171	0.964	0.999286	0.948794	0.993395	0.987652	0	0	0	0	102	115.9	107.2	91.5	98.5	Peak Found	Peak Found	Peak Found	Peak Found	High	1
FALSE	High	Master Protein	Q15459	Splicing factor 3A subunit 1 OS=Homo sapiens OX=9606 GN=SF3A1 PE=1 SV=1	0	4.759	3	2	3	2	793	88.8	5.22	1147		2		0	0				100				3.00121e-17									900	Not Found	Not Found	Not Found	Not Found	High	1
FALSE	High	Master Protein	A0A0A0MSJ9	Ras GTPase-activating protein 2 OS=Homo sapiens OX=9606 GN=RASA2 PE=1 SV=1	0	4.755	2	2	5	1	853	96.9	7.2	1965		2		0	1	1.859	1.661	1.487	1.915	0.906229	0.674901	0.898226	0.818107	16.66	15.3	24.54	47.83	113.5	100.8	93.6	57.5	98.1	Peak Found	Peak Found	Peak Found	Peak Found	High	1
FALSE	High	Master Protein	C9J0E4	Cystatin-A OS=Homo sapiens OX=9606 GN=CSTA PE=1 SV=1	0	4.743	30	2	3	2	63	7.1	7.24	1220		2		0	0	0.486	0.478	0.481	0.395	0.962576	0.257138	0.0659432	0.964825	15.7	9.94	0	0	78.3	77	42.3	161.7	29.1	Peak Found	Peak Found	Peak Found	Peak Found	Peak Found	1
FALSE	High	Master Protein	Q9UJX6	Anaphase-promoting complex subunit 2 OS=Homo sapiens OX=9606 GN=ANAPC2 PE=1 SV=1	0	4.742	2	2	2	2	822	93.8	5.22	927		2		0	0	100	100		100	5.33141e-17	6.62708e-17		3.00121e-17					131.8	73.1			415.5	Peak Found	Peak Found	Not Found	Not Found	High	1
FALSE	High	Master Protein	E7ESB6	GRB10-interacting GYF protein 2 (Fragment) OS=Homo sapiens OX=9606 GN=GIGYF2 PE=1 SV=1	0	4.729	2	1	1	1	836	96.2	5.14	501		1		0	0				100				3.00121e-17									900	Not Found	Not Found	Not Found	Not Found	High	1
FALSE	High	Master Protein	C9IZQ6	HCG2022551, isoform CRA_j OS=Homo sapiens OX=9606 GN=KALRN PE=1 SV=1	0	4.717	1	2	3	2	1654	191.1	6.05	884		2		0	0	0.383	0.767	0.799	0.017	0.872556	0.84561	0.649913	0.280056	14.46	7.54	60.2	0	69	121.9	98	165.9	2.6	Peak Found	High	Peak Found	Peak Found	Peak Found	1
FALSE	High	Master Protein	P08865	40S ribosomal protein SA OS=Homo sapiens OX=9606 GN=RPSA PE=1 SV=4	0	4.675	7	2	4	2	295	32.8	4.87	1507		2		0	0	0.224	0.574	0.367	0.01	0.467989	0.457837	0.0357936	3.00121e-17	0	10	0		36.1	166.4	59.1	291.3		Peak Found	High	Peak Found	High	Not Found	1
FALSE	High	Master Protein	E7ENQ1	Mitogen-activated protein kinase kinase kinase kinase 4 OS=Homo sapiens OX=9606 GN=MAP4K4 PE=1 SV=1	0	4.649	2	2	2	2	1154	132.1	7.53	653		2		0	0				100				3.00121e-17									900	Not Found	Not Found	Not Found	Not Found	High	1
FALSE	High	Master Protein	Q05397	Focal adhesion kinase 1 OS=Homo sapiens OX=9606 GN=PTK2 PE=1 SV=2	0	4.645	2	2	2	2	1052	119.2	6.62	535		2		0	0	0.593	0.589	0.841		0.977307	0.48968	0.803124		0	0	0		90	89.3	127.6	151.8	43.3	Peak Found	Peak Found	Peak Found	Peak Found	High	1
FALSE	High	Master Protein	G3XAL9	Solute carrier family 12 (Sodium/potassium/chloride transporters), member 2, isoform CRA_a OS=Homo sapiens OX=9606 GN=SLC12A2 PE=1 SV=1	0	4.644	2	2	2	2	1150	124.5	6.09	572		2		0	0	1.116	0.982	1.707		0.999286	0.986398	0.736317		0	0	0		52.9	246	227	47.4	21.2	Peak Found	High	Peak Found	Peak Found	Peak Found	1
FALSE	High	Master Protein	Q9H0K6	Pseudouridylate synthase 7 homolog-like protein OS=Homo sapiens OX=9606 GN=PUS7L PE=1 SV=1	0	4.613	4	2	2	2	701	80.6	7.56	428		2		0	0				100				3.00121e-17									900	Not Found	Not Found	Not Found	Not Found	High	1
FALSE	High	Master Protein	Q13823	Nucleolar GTP-binding protein 2 OS=Homo sapiens OX=9606 GN=GNL2 PE=1 SV=1	0	4.609	2	2	2	2	731	83.6	9.25	740		2		0	0	0.705	0.853	0.736	0.404	0.999286	0.932346	0.526511	0.97836	0	0	0	166.59	94.5	114.3	98.6	172.4	61.3	Peak Found	Peak Found	Peak Found	Peak Found	High	1
FALSE	High	Master Protein	P02675	Fibrinogen beta chain OS=Homo sapiens OX=9606 GN=FGB PE=1 SV=2	0	4.563	7	2	2	2	491	55.9	8.27	443		2		0	0	0.01	0.01	0.01	0.01	5.33141e-17	6.62708e-17	5.41217e-17	3.00121e-17								900		Not Found	Not Found	Not Found	High	Not Found	1
FALSE	High	Master Protein	Q12882	Dihydropyrimidine dehydrogenase [NADP(+)] OS=Homo sapiens OX=9606 GN=DPYD PE=1 SV=2	0	4.546	2	2	2	2	1025	111.3	7.05	609		2		0	0	0.525	0.743	0.873	0.58	0.962576	0.826764	0.827984	0.999945	8.18	50.17	7.03	43.49	81.3	127.9	135.1	152.9	97.8	Peak Found	Peak Found	Peak Found	High	High	1
FALSE	High	Master Protein	A0A2U3TZV8	Phosphoinositide phospholipase C OS=Homo sapiens OX=9606 GN=PLCH1 PE=1 SV=1	0	4.524	0	1	15	1	1685	188.6	7.84	8054		1		0	0	17.263	8.915	4.164	24.877	0.0522747	2.35108e-05	0.00250815	0.378408	0	0	0	0	142.4	73.5	34.3	8.2	205.2	High	High	High	Peak Found	High	1
FALSE	High	Master Protein	O75815	Breast cancer anti-estrogen resistance protein 3 OS=Homo sapiens OX=9606 GN=BCAR3 PE=1 SV=1	0	4.516	4	2	2	2	825	92.5	7.96	410		2		0	0	4.902	2.139	1.604	0.971	0.448325	0.338715	0.771758	0.980254	0	0	0	0	155.6	67.9	50.9	31.7	36.6	Peak Found	Peak Found	Peak Found	Peak Found	High	1
FALSE	High	Master Protein	Q6P1A2	Lysophospholipid acyltransferase 5 OS=Homo sapiens OX=9606 GN=LPCAT3 PE=1 SV=1	0	4.498	2	1	6	1	487	56	8.69	2397		1		0	0	0.835	0.91	0.988	0.278	0.999286	0.966518	0.92938	0.906797	0	0	0	0	107.2	116.8	126.8	128.3	35.7	Peak Found	High	Peak Found	Peak Found	High	1
FALSE	High	Master Protein	O15056	Synaptojanin-2 OS=Homo sapiens OX=9606 GN=SYNJ2 PE=1 SV=3	0	4.449	1	2	3	2	1496	165.4	7.34	649		2		0	0	1.34	0.99	1.367	0.439	0.999286	0.986398	0.898559	0.971083	158.85	65.65	11.7	56.66	74.3	82.9	158.3	124.8	38.7	Peak Found	Peak Found	Peak Found	Peak Found	Peak Found	1
FALSE	High	Master Protein	Q8IWT6	Volume-regulated anion channel subunit LRRC8A OS=Homo sapiens OX=9606 GN=LRRC8A PE=1 SV=1	0	4.384	1	1	2	1	810	94.1	7.94	1199		1		0	0	3.753	2.979	2.691	7.539	0.269935	0.085221	0.263726	0.387509	0	0	0	0	128.3	101.9	92	34.2	257.8	Peak Found	Peak Found	Peak Found	Peak Found	High	1
FALSE	High	Master Protein	K7EM09	Transmembrane protein 205 (Fragment) OS=Homo sapiens OX=9606 GN=TMEM205 PE=1 SV=1	0	4.382	14	1	5	1	120	13.4	8.1	1997		1		0	0	0.526	0.932	0.617	0.31	0.961155	0.984196	0.250346	0.927415	0	0	0	0	84.4	149.4	99	160.3	49.6	High	High	Peak Found	High	Peak Found	1
FALSE	High	Master Protein	A0A0B4J259	1,4-beta-N-acetylmuramidase C OS=Homo sapiens OX=9606 GN=LYZ PE=1 SV=1	0	4.373	15	2	4	2	137	15.3	8.69	1249		2		0	0	0.557	0.739	0.476	0.337	0.977307	0.820052	0.0698177	0.956382	0	11.4	0	0	41	124.3	35.1	169.5	32.3	Peak Found	High	Peak Found	Peak Found	High	1
FALSE	High	Master Protein	Q7Z695	Uncharacterized aarF domain-containing protein kinase 2 OS=Homo sapiens OX=9606 GN=ADCK2 PE=1 SV=1	0	4.323	1	1	2	1	626	68.9	8.76	1094		1		0	0	13.405	10.581	8.786	61.934	0.0269517	3.8681e-06	0.000304917	0.186105	0	0	0	0	106.1	83.7	69.5	7.9	490.1	High	High	Peak Found	Peak Found	Peak Found	1
FALSE	High	Master Protein	P18887	DNA repair protein XRCC1 OS=Homo sapiens OX=9606 GN=XRCC1 PE=1 SV=2	0	4.308	3	2	2	2	633	69.4	6.39	699		2		0	0				100				3.00121e-17									834.2	Not Found	Not Found	Not Found	Not Found	High	1
FALSE	High	Master Protein	P31025	Lipocalin-1 OS=Homo sapiens OX=9606 GN=LCN1 PE=1 SV=1	0	4.297	6	1	1	1	176	19.2	5.58	632		1		0	0	0.588	0.659	0.552	0.491	0.977307	0.648414	0.147549	0.982616	0	0	0	0	79.5	89.2	74.6	135.3	66.5	Peak Found	Peak Found	Peak Found	Peak Found	Peak Found	1
FALSE	High	Master Protein	A0A0A6YYC0	Non-specific serine/threonine protein kinase (Fragment) OS=Homo sapiens OX=9606 GN=RPS6KA4 PE=1 SV=5	0	4.28	3	2	2	2	704	78.3	7.62	618		2		0	0	100	100	100	100	5.33141e-17	6.62708e-17	5.41217e-17	3.00121e-17					58.6	67.9	47		690.9	Peak Found	Peak Found	Peak Found	Not Found	High	1
FALSE	High	Master Protein	Q9UBM4	Opticin OS=Homo sapiens OX=9606 GN=OPTC PE=1 SV=1	0	4.279	2	1	6	1	332	37.2	5.59	3524		1		0	0	13.105	6.828	6.461	23.711	0.0742996	0.000296468	0.000869534	0.387937	0	0	0	0	160.4	83.6	79.1	12.2	290.2	High	High	Peak Found	Peak Found	High	1
FALSE	High	Master Protein	P11047	Laminin subunit gamma-1 OS=Homo sapiens OX=9606 GN=LAMC1 PE=1 SV=3	0	4.265	1	2	3	2	1609	177.5	5.12	805		2		0	0	1.14	1.281	1.45	0.818	0.999286	0.941474	0.932017	0.980254	0	0	0	0	81.2	91.3	103.3	71.2	302.7	Peak Found	Peak Found	Peak Found	Peak Found	High	1
FALSE	High	Master Protein	Q5SZX6	T-complex protein 1 subunit gamma (Fragment) OS=Homo sapiens OX=9606 GN=CCT3 PE=1 SV=1	0	4.253	7	2	4	2	276	30.7	6.93	835		2		0	0	0.771	0.889	1.261	0.648	0.999286	0.950576	0.972863	0.999163	28.49	52	15.53	0	98.7	123.5	155.2	118.4	50.8	Peak Found	High	Peak Found	High	Peak Found	1
FALSE	High	Master Protein	P69891	Hemoglobin subunit gamma-1 OS=Homo sapiens OX=9606 GN=HBG1 PE=1 SV=2	0	4.248	13	2	2	2	147	16.1	7.2	497		2		0	0	0.791	0.611	1.504	0.346	0.999286	0.545305	0.888304	0.964825	174.22	201.63	0	240.49	109.2	90.9	106.8	112.2	57.3	Peak Found	Peak Found	Peak Found	Peak Found	Peak Found	1
FALSE	High	Master Protein	Q8NBI5	Solute carrier family 43 member 3 OS=Homo sapiens OX=9606 GN=SLC43A3 PE=1 SV=2	0	4.247	1	1	3	1	491	54.5	8.53	1750		1		0	0	0.7	0.997	0.531	0.35	0.999286	0.986398	0.190148	0.964825	0	0	0	0	98.9	140.9	75	141.3	49.5	Peak Found	Peak Found	Peak Found	High	Peak Found	1
FALSE	High	Master Protein	Q8IUC1	Keratin-associated protein 11-1 OS=Homo sapiens OX=9606 GN=KRTAP11-1 PE=1 SV=1	0	4.245	7	1	1	1	163	17.1	7.9	582		1		0	0																		Not Found	Not Found	Not Found	Not Found	Not Found	1
FALSE	High	Master Protein	O43395	U4/U6 small nuclear ribonucleoprotein Prp3 OS=Homo sapiens OX=9606 GN=PRPF3 PE=1 SV=2	0	4.184	2	1	1	1	683	77.5	9.5	538		1		0	0				100				3.00121e-17									900	Not Found	Not Found	Not Found	Not Found	High	1
FALSE	High	Master Protein	K7ELC7	60S ribosomal protein L27 (Fragment) OS=Homo sapiens OX=9606 GN=RPL27 PE=1 SV=1	0	4.179	12	2	3	2	144	16.5	10.58	849		2		0	0	0.599	1.345	1.049	0.716	0.985423	0.901011	0.963133	0.982359	49.21	3.1	59.07	0	77.4	202.7	133.2	148.9	23.4	Peak Found	High	Peak Found	High	Peak Found	1
FALSE	High	Master Protein	B1ALY0	PALM2 and AKAP2 fusion (Fragment) OS=Homo sapiens OX=9606 GN=PALM2AKAP2 PE=1 SV=1	0	4.171	6	2	2	2	433	47.6	4.89	485		2		0	0				100				3.00121e-17									900	Not Found	Not Found	Not Found	Not Found	High	1
FALSE	High	Master Protein	H7C106	Reticulon (Fragment) OS=Homo sapiens OX=9606 GN=RTN4 PE=1 SV=1	0	4.15	4	1	3	1	203	22.8	8.73	1211		1		0	0	0.726	1.467	1.035	0.452	0.999286	0.828858	0.954707	0.982616	0	0	0	0	88.5	178.7	126	121.8	55.1	Peak Found	High	Peak Found	High	Peak Found	1
FALSE	High	Master Protein	O60264	SWI/SNF-related matrix-associated actin-dependent regulator of chromatin subfamily A member 5 OS=Homo sapiens OX=9606 GN=SMARCA5 PE=1 SV=1	0	4.136	2	2	2	2	1052	121.8	8.09	743		2		0	0				100				3.00121e-17									805.8	Not Found	Not Found	Not Found	Not Found	High	1
FALSE	High	Master Protein	Q8IWV7	E3 ubiquitin-protein ligase UBR1 OS=Homo sapiens OX=9606 GN=UBR1 PE=1 SV=1	0	4.096	1	2	2	2	1749	200.1	6.01	518		2		0	0	0.554	0.561	0.899	0.01	0.977307	0.434618	0.806462	3.00121e-17	21.21	122.04	79.32		96.5	122.4	172.9	173.5		Peak Found	High	Peak Found	High	Not Found	1
FALSE	High	Master Protein	A0A5S6STF9	THO complex subunit 7 homolog OS=Homo sapiens OX=9606 GN=THOC7 PE=1 SV=1	0	4.074	9	2	4	2	152	17.8	5.77	1460		2		0	0	1.934	1.127	2.242	1.446	0.928961	0.986398	0.18777	0.971083	4.42	69.41	82.03	64.44	112.2	81.2	169.5	58.5	102.2	Peak Found	High	High	High	High	1
FALSE	High	Master Protein	Q9BXT2	Voltage-dependent calcium channel gamma-6 subunit OS=Homo sapiens OX=9606 GN=CACNG6 PE=1 SV=1	0	4.071	3	1	9	1	260	28.1	9.17	5920		1		0	0	2.91	1.039	1.893	3.06	0.757688	0.997378	0.404713	0.84206	0	0	0	0	178.9	63.9	116.4	61.5	188.1	High	High	High	High	High	1
FALSE	High	Master Protein	P29322	Ephrin type-A receptor 8 OS=Homo sapiens OX=9606 GN=EPHA8 PE=1 SV=2	0	4.059	2	2	3	1	1005	110.9	8.06	942		2		0	0	7.232	1.509	34.704	1.194	0.263206	0.816051	5.41217e-17	0.964825	0	0	0	0	79.1	16.5	379.5	10.9	13.1	High	Peak Found	Peak Found	Peak Found	Peak Found	1
FALSE	High	Master Protein	O60911	Cathepsin L2 OS=Homo sapiens OX=9606 GN=CTSV PE=1 SV=2	0	4.054	4	2	3	2	334	37.3	8.76	1044		2		0	0	0.119	1.652	0.31	0.01	0.134371	0.678012	0.0111206	3.00121e-17	0	25.03	0		22.4	455.8	30.7	286.9		Peak Found	High	Peak Found	High	Not Found	1
FALSE	High	Master Protein	Q8NDT2	Putative RNA-binding protein 15B OS=Homo sapiens OX=9606 GN=RBM15B PE=1 SV=3	0	3.998	1	1	1	1	890	97.1	9.85	609		1		0	0	0.574	0.848	1.046	0.01	0.984715	0.929662	0.969118	3.00121e-17	0	0	0		80.6	119	146.7	140.3		Peak Found	Peak Found	Peak Found	Peak Found	Not Found	1
FALSE	High	Master Protein	Q9Y5T5	Ubiquitin carboxyl-terminal hydrolase 16 OS=Homo sapiens OX=9606 GN=USP16 PE=1 SV=1	0	3.998	2	2	2	2	823	93.5	6.93	756		2		0	0	0.878	1.257	2.486	7.092	0.999286	0.950576	0.359799	0.522183	0	0	0	0	30.3	43.4	85.9	34.5	555.5	Peak Found	Peak Found	Peak Found	Peak Found	High	1
FALSE	High	Master Protein	Q86UP2	Kinectin OS=Homo sapiens OX=9606 GN=KTN1 PE=1 SV=1	0	3.989	1	1	3	1	1357	156.2	5.64	1688		1		0	0	2.568	2.331	1.862	0.777	0.581563	0.255549	0.698441	0.940202	0	0	0	0	129.8	117.8	94.1	50.5	39.3	High	Peak Found	Peak Found	Peak Found	Peak Found	1
FALSE	High	Master Protein	Q5JRA6	Transport and Golgi organization protein 1 homolog OS=Homo sapiens OX=9606 GN=MIA3 PE=1 SV=1	0	3.979	1	2	3	2	1907	213.6	4.84	606		2		0	0	100	100		100	5.33141e-17	6.62708e-17		3.00121e-17					187.4	259.3			364.4	Peak Found	High	Not Found	Not Found	High	1
FALSE	High	Master Protein	A0A0U1RRM8	Fermitin family homolog 2 (Fragment) OS=Homo sapiens OX=9606 GN=FERMT2 PE=1 SV=1	0	3.965	4	2	3	2	545	61.9	5.81	744		2		0	0	0.812	1.172	1.273	0.796	0.999286	0.986398	0.985826	0.982616	0	0	0	0	84.8	122.3	154.3	104.4	147.3	Peak Found	Peak Found	Peak Found	Peak Found	High	1
FALSE	High	Master Protein	Q5SZE1	Ceramide synthase 2 (Fragment) OS=Homo sapiens OX=9606 GN=CERS2 PE=1 SV=2	0	3.942	3	1	2	1	304	36.4	9.25	843		1		0	0	0.826	1.154	0.953	0.086	0.999286	0.986398	0.898559	0.462139	0	0	0	0	104.1	145.4	120.1	126	10.8	Peak Found	Peak Found	High	Peak Found	Peak Found	1
FALSE	High	Master Protein	P07476	Involucrin OS=Homo sapiens OX=9606 GN=IVL PE=1 SV=2	0	3.927	5	2	2	2	585	68.4	4.61	406		2		0	0	0.01	0.01	0.01	0.01	5.33141e-17	6.62708e-17	5.41217e-17	3.00121e-17								900		Not Found	Not Found	Not Found	High	Not Found	1
FALSE	High	Master Protein	O94829	Importin-13 OS=Homo sapiens OX=9606 GN=IPO13 PE=1 SV=3	0	3.918	1	1	1	1	963	108.1	5.3	484		1		0	0																		Not Found	Not Found	Not Found	Not Found	High	1
FALSE	High	Master Protein	Q9Y663	Heparan sulfate glucosamine 3-O-sulfotransferase 3A1 OS=Homo sapiens OX=9606 GN=HS3ST3A1 PE=1 SV=1	0	3.869	2	1	7	1	406	44.9	9.5	3028		1		0	0	1.839	1.151	1.612	0.94	0.962576	0.986398	0.755337	0.982359	0	0	0	0	138	86.4	120.9	75	70.6	High	High	High	Peak Found	Peak Found	1
FALSE	High	Master Protein	O15439	Multidrug resistance-associated protein 4 OS=Homo sapiens OX=9606 GN=ABCC4 PE=1 SV=3	0	3.865	1	2	4	2	1325	149.4	8.19	895		2		0	0	0.972	1.2	1.065	0.123	0.999286	0.979573	0.965576	0.63771	3.63	10.84	20.81	0	117.7	145.7	130	121.1	7.4	Peak Found	Peak Found	Peak Found	Peak Found	Peak Found	1
FALSE	High	Master Protein	E9PKN0	Pre-mRNA cleavage complex 2 protein Pcf11 (Fragment) OS=Homo sapiens OX=9606 GN=PCF11 PE=1 SV=1	0	3.861	2	2	2	2	784	88.9	9.85	577		2		0	0	100		100		5.33141e-17		5.41217e-17						92.2		397.6			Peak Found	Not Found	High	Not Found	Not Found	1
FALSE	High	Master Protein	Q9BXB4	Oxysterol-binding protein-related protein 11 OS=Homo sapiens OX=9606 GN=OSBPL11 PE=1 SV=2	0	3.836	3	2	2	2	747	83.6	7.06	437		2		0	0	100	100		100	5.33141e-17	6.62708e-17		3.00121e-17					35.5	33.2			798.2	Peak Found	Peak Found	Not Found	Not Found	High	1
FALSE	High	Master Protein	Q5SX87	Rab GDP dissociation inhibitor (Fragment) OS=Homo sapiens OX=9606 GN=GDI2 PE=1 SV=1	0	3.83	9	2	3	2	263	29.8	6.62	789		2		0	0	0.341	0.966	1.065	0.191	0.760274	0.986398	0.969118	0.801017	0	25.83	0	0	50.8	140.9	158.9	166.3	28.6	Peak Found	Peak Found	Peak Found	High	Peak Found	1
FALSE	High	Master Protein	Q15043	Metal cation symporter ZIP14 OS=Homo sapiens OX=9606 GN=SLC39A14 PE=1 SV=3	0	3.824	2	1	2	1	492	54.2	5.33	749		1		0	0	1.596	1.043	1.153	2.203	0.956623	0.997378	0.997209	0.799136	0	0	0	0	133.6	87.3	96.5	83.7	184.4	Peak Found	Peak Found	Peak Found	High	High	1
FALSE	High	Master Protein	A0A0U1RRK1	Calcium uptake protein 1, mitochondrial OS=Homo sapiens OX=9606 GN=MICU1 PE=1 SV=1	0.001	3.79	1	1	1	1	480	54.9	8.27	543		1		0	0	100	100	100	100	5.33141e-17	6.62708e-17	5.41217e-17	3.00121e-17					136.3	152.3	128.4		296	Peak Found	Peak Found	Peak Found	Not Found	High	1
FALSE	High	Master Protein	Q9NTU7	Cerebellin-4 OS=Homo sapiens OX=9606 GN=CBLN4 PE=1 SV=1	0.001	3.781	3	1	1	1	201	21.8	8.73	824		1		0	0	1.295	1.279	1.219	0.759	0.999286	0.943406	0.982514	0.999163	0	0	0	0	119.2	117.7	112.2	92	69.9	Peak Found	Peak Found	Peak Found	Peak Found	High	1
FALSE	High	Master Protein	P81277	Prolactin-releasing peptide OS=Homo sapiens OX=9606 GN=PRLH PE=2 SV=1	0.001	3.736	10	1	2	1	87	9.6	11.66	1125		1		0	0	11.372	11.331	100	14.648	0.0819739	1.81854e-06	5.41217e-17	0.484334	0	0	0	0	25.2	25.1	513.3	2.2	32.4	Peak Found	Peak Found	High	Peak Found	Peak Found	1
FALSE	High	Master Protein	O15111	Inhibitor of nuclear factor kappa-B kinase subunit alpha OS=Homo sapiens OX=9606 GN=CHUK PE=1 SV=2	0.001	3.723	2	1	1	1	745	84.6	6.73	400		1		0	0				100				3.00121e-17									900	Not Found	Not Found	Not Found	Not Found	High	1
FALSE	High	Master Protein	Q15397	Pumilio homolog 3 OS=Homo sapiens OX=9606 GN=PUM3 PE=1 SV=3	0.001	3.721	1	1	2	1	648	73.5	9.64	861		1		0	0	9.004	7.481	4.671	9.321	0.0922829	0.000129413	0.0215249	0.407092	0	0	0	0	150.5	125	78.1	16.7	155.8	High	Peak Found	Peak Found	Peak Found	High	1
FALSE	High	Master Protein	E9PIM0	CREB/ATF bZIP transcription factor OS=Homo sapiens OX=9606 GN=CREBZF PE=1 SV=1	0.001	3.69	2	1	5	1	358	37.7	5.3	3189		1		0	0	0.994	1.391	1.38	0.773	0.999286	0.873487	0.894219	0.999163	0	0	0	0	101	141.5	140.4	101.7	78.6	High	Peak Found	Peak Found	High	High	1
FALSE	High	Master Protein	A8MX94	GST class-pi OS=Homo sapiens OX=9606 GN=GSTP1 PE=1 SV=1	0.001	3.678	15	2	2	2	174	19.5	5.97	403		2		0	0	0.21	0.537	0.292	0.103	0.451229	0.378613	0.00631695	0.607495	0	0	0	0	43.4	111.1	60.5	507.7	21.2	Peak Found	High	Peak Found	High	Peak Found	1
FALSE	High	Master Protein	A0A590UJL2	Disks large homolog 1 OS=Homo sapiens OX=9606 GN=DLG1 PE=1 SV=1	0.001	3.673	2	1	1	1	575	63	6.61	559		1		0	0	0.47	2.256	1.956	1.544	0.868081	0.284816	0.636864	0.723844	0	0	0	0	41.6	199.9	173.3	88.6	136.8	Peak Found	Peak Found	Peak Found	Peak Found	High	1
FALSE	High	Master Protein	Q15046	Lysine--tRNA ligase OS=Homo sapiens OX=9606 GN=KARS1 PE=1 SV=3	0.001	3.668	3	2	2	2	597	68	6.35	697		2		0	0	2.356	1.698	1.642	2.1	0.826643	0.63904	0.786836	0.837436	0	0	0	0	128.5	92.6	89.6	54.6	114.6	Peak Found	Peak Found	Peak Found	High	Peak Found	1
FALSE	High	Master Protein	Q17RC7	Exocyst complex component 3-like protein 4 OS=Homo sapiens OX=9606 GN=EXOC3L4 PE=1 SV=2	0.001	3.666	1	1	8	1	722	79.8	6.32	3939		1		0	0	79.05	5.11	56.465	43.585	0.000496126	0.0029225	5.41217e-17	0.250473	0	0	0	0	200.7	13	143.4	2.5	110.7	High	High	High	Peak Found	High	1
FALSE	High	Master Protein	P14859	POU domain, class 2, transcription factor 1 OS=Homo sapiens OX=9606 GN=POU2F1 PE=1 SV=2	0.001	3.641	2	1	1	1	743	76.4	6.81	350		1		0	0				100				3.00121e-17									900	Not Found	Not Found	Not Found	Not Found	High	1
FALSE	High	Master Protein	Q14746	Conserved oligomeric Golgi complex subunit 2 OS=Homo sapiens OX=9606 GN=COG2 PE=1 SV=1	0.001	3.547	1	1	1	1	738	83.2	6.62	607		1		0	0	100	100		100	5.33141e-17	6.62708e-17		3.00121e-17					158.2	122.4			439.4	Peak Found	Peak Found	Not Found	Not Found	High	1
FALSE	High	Master Protein	P09601	Heme oxygenase 1 OS=Homo sapiens OX=9606 GN=HMOX1 PE=1 SV=1	0.001	3.544	4	1	1	1	288	32.8	8.25	388		1		0	0	0.01	0.01	0.01	0.01	5.33141e-17	6.62708e-17	5.41217e-17	3.00121e-17								900		Not Found	Not Found	Not Found	High	Not Found	1
FALSE	High	Master Protein	O75475	PC4 and SFRS1-interacting protein OS=Homo sapiens OX=9606 GN=PSIP1 PE=1 SV=1	0.001	3.532	2	1	2	1	530	60.1	9.13	715		1		0	0	0.368	1.087	1.083	0.131	0.866242	0.991659	0.987625	0.750889	0	0	0	0	59	174.2	173.6	160.3	21	Peak Found	High	Peak Found	High	Peak Found	1
FALSE	High	Master Protein	Q09472	Histone acetyltransferase p300 OS=Homo sapiens OX=9606 GN=EP300 PE=1 SV=2	0.001	3.523	0	1	3	1	2414	264	8.5	1252		1		0	0	3.755	1.542	2.232	0.01	0.419031	0.786944	0.472933	3.00121e-17	0	0	0		163.1	67	97	43.4		High	Peak Found	Peak Found	Peak Found	Not Found	1
FALSE	High	Master Protein	A6NFQ2-3	Isoform 3 of TRPM8 channel-associated factor 2 OS=Homo sapiens OX=9606 GN=TCAF2	0.001	3.512	1	1	2	1	815	90.6	7.69	1427		1		0	0	14.683	7.755	6.32	61.07	0.0516996	9.24643e-05	0.00198399	0.188265	0	0	0	0	109.1	57.6	47	7.4	453.8	Peak Found	Peak Found	Peak Found	Peak Found	High	1
FALSE	High	Master Protein	P17655	Calpain-2 catalytic subunit OS=Homo sapiens OX=9606 GN=CAPN2 PE=1 SV=6	0.001	3.489	2	2	2	2	700	79.9	4.98	567		2		0	0	0.947	0.928	1.236	0.512	0.999286	0.981015	0.987625	0.983233	0	0	0	0	115.1	100	124.2	83.4	107.2	Peak Found	Peak Found	Peak Found	Peak Found	Peak Found	1
FALSE	High	Master Protein	H0Y9Z8	Condensin complex subunit 3 (Fragment) OS=Homo sapiens OX=9606 GN=NCAPG PE=1 SV=1	0.001	3.482	11	2	2	2	269	30.3	5.11	215		2		0	0													151	45.1	83.3	300.4	82.9	Peak Found	Peak Found	Peak Found	High	High	1
FALSE	High	Master Protein	K7ENJ4	ATP synthase subunit alpha, mitochondrial (Fragment) OS=Homo sapiens OX=9606 GN=ATP5F1A PE=1 SV=1	0.001	3.442	9	2	2	2	199	21.3	10.45	545		2		0	0	0.27	0.562	0.825	0.129	0.643939	0.434618	0.683183	0.72818	9.16	18.58	24.9	0	53.8	111.5	164	200	14.4	Peak Found	High	Peak Found	High	Peak Found	1
FALSE	High	Master Protein	P46939	Utrophin OS=Homo sapiens OX=9606 GN=UTRN PE=1 SV=2	0.004	3.421	0	2	2	2	3433	394.2	5.33	588		2		0	0	1.886	2.744	2.043	2.697	0.832631	0.12613	0.580788	0.723844	69.13	91.71	0	193.95	89.8	131	80.1	53.7	150.8	Peak Found	Peak Found	High	Peak Found	Peak Found	1
FALSE	High	Master Protein	K7EKI0	Envoplakin OS=Homo sapiens OX=9606 GN=EVPL PE=1 SV=1	0.004	3.398	0	1	3	1	2055	233.7	7.25	1730		1		0	0	2.532	2.311	1.647	44.429	0.725904	0.263449	0.803124	0.246424	0	0	0	0	41.2	37.6	26.8	16.3	723.3	High	Peak Found	Peak Found	Peak Found	High	1
FALSE	High	Master Protein	P55290	Cadherin-13 OS=Homo sapiens OX=9606 GN=CDH13 PE=1 SV=1	0.004	3.39	2	1	1	1	713	78.2	4.98	362		1		0	0	1.041	0.941	1.322	1.698	0.999286	0.985987	0.972863	0.68769	0	0	0	0	110.7	100.2	140.7	106.4	180.7	Peak Found	Peak Found	Peak Found	Peak Found	High	1
FALSE	High	Master Protein	B8ZZ51	Malate dehydrogenase, cytoplasmic OS=Homo sapiens OX=9606 GN=MDH1 PE=1 SV=1	0.004	3.383	13	2	5	2	169	18.7	5.94	945		2		0	0	0.4	0.818	0.698	0.162	0.853807	0.894332	0.530225	0.749465	0	54.26	0	0	48	173.6	83.8	209.8	19.4	Peak Found	High	Peak Found	High	Peak Found	1
FALSE	High	Master Protein	O15118	NPC intracellular cholesterol transporter 1 OS=Homo sapiens OX=9606 GN=NPC1 PE=1 SV=2	0.004	3.355	1	1	7	1	1278	142.1	5.36	2289		1		0	0	0.634	0.804	1.508	0.01	0.985423	0.879073	0.776527	3.00121e-17	0	0	0		87.9	111.6	209.3	138.7		High	Peak Found	High	High	High	1
FALSE	High	Master Protein	Q96K76	Ubiquitin carboxyl-terminal hydrolase 47 OS=Homo sapiens OX=9606 GN=USP47 PE=1 SV=3	0.004	3.351	1	1	1	1	1375	157.2	5.08	427		1		0	0				100				3.00121e-17									900	Not Found	Not Found	Not Found	Not Found	High	1
FALSE	High	Master Protein	A0A3B3IUA8	Guanine nucleotide-binding protein G(i) subunit alpha-1 OS=Homo sapiens OX=9606 GN=GNAI1 PE=1 SV=1	0.004	3.346	7	1	4	1	148	16.7	9.5	1826		1		0	0	0.983	1.411	1.545	0.632	0.999286	0.862357	0.855726	0.988414	0	0	0	0	94.1	135.2	148	95.8	60.5	Peak Found	High	Peak Found	High	Peak Found	1
FALSE	High	Master Protein	P23469	Receptor-type tyrosine-protein phosphatase epsilon OS=Homo sapiens OX=9606 GN=PTPRE PE=1 SV=1	0.003	3.343	1	1	1	1	700	80.6	7.02	387		1		0	0	1.639	1.648	1.594	3.741	0.874614	0.681689	0.876294	0.358213	0	0	0	0	114.3	115	111.3	69.8	261.1	Peak Found	Peak Found	Peak Found	Peak Found	High	1
FALSE	High	Master Protein	F8VVT9	Arf-GAP with GTPase, ANK repeat and PH domain-containing protein 2 OS=Homo sapiens OX=9606 GN=AGAP2 PE=1 SV=1	0.003	3.338	1	1	2	1	1192	124.5	9.86	984		1		0	0	0.01	1.043	1.065	0.175	5.33141e-17	0.997378	0.977235	0.792321		0	0	0		161.7	165	155	27.2	Not Found	Peak Found	High	Peak Found	Peak Found	1
FALSE	High	Master Protein	Q14574	Desmocollin-3 OS=Homo sapiens OX=9606 GN=DSC3 PE=1 SV=3	0.003	3.323	1	1	3	1	896	99.9	6.1	1089		1		0	0	3.159	1.451	2.114	1.118	0.70659	0.84561	0.250346	0.982616	0	0	0	0	140.9	64.7	94.3	44.6	49.9	Peak Found	Peak Found	Peak Found	High	Peak Found	1
FALSE	High	Master Protein	Q5T750	Skin-specific protein 32 OS=Homo sapiens OX=9606 GN=XP32 PE=1 SV=1	0.003	3.321	3	1	2	1	250	26.2	7.97	790		1		0	0	0.01	0.01	0.721	0.263	5.33141e-17	6.62708e-17	0.526511	0.90445			0	0			237.2	329.2	86.7	Not Found	Not Found	Peak Found	High	Peak Found	1
FALSE	High	Master Protein	Q7L2J0	7SK snRNA methylphosphate capping enzyme OS=Homo sapiens OX=9606 GN=MEPCE PE=1 SV=1	0.003	3.306	1	1	1	1	689	74.3	9.57	501		1		0	0				100				3.00121e-17									900	Not Found	Not Found	Not Found	Not Found	High	1
FALSE	High	Master Protein	F5H538	Mitogen-activated protein kinase kinase kinase 4 OS=Homo sapiens OX=9606 GN=MAP3K4 PE=1 SV=1	0.003	3.297	0	1	1	1	1604	181.1	6.32	656		1		0	0	100		100	100	5.33141e-17		5.41217e-17	3.00121e-17					126		88.4		175.9	Peak Found	Not Found	Peak Found	Not Found	High	1
FALSE	High	Master Protein	Q4J6C6	Prolyl endopeptidase-like OS=Homo sapiens OX=9606 GN=PREPL PE=1 SV=1	0.003	3.266	3	2	4	2	727	83.9	6.38	603		2		0	0	0.426	0.749	0.635	0.157	0.909077	0.826764	0.269604	0.754513	9.06	74.01	56.97	51.81	98.7	158.8	135.4	237.8	33.7	Peak Found	High	Peak Found	High	Peak Found	1
FALSE	High	Master Protein	A0A0G2JP37	NACHT, LRR and PYD domains-containing protein 2 (Fragment) OS=Homo sapiens OX=9606 GN=NLRP2 PE=1 SV=1	0.003	3.249	1	1	5	1	881	100.2	6.11	2811		1		0	0	9.06	6.731	5.277	1.031	0.196554	0.000331829	0.00285115	0.864009	0	0	0	0	167	124	97.3	18.4	19	High	High	Peak Found	Peak Found	Peak Found	1
FALSE	High	Master Protein	A0A087WXK2	Retrotransposon-derived protein PEG10 OS=Homo sapiens OX=9606 GN=PEG10 PE=1 SV=1	0.003	3.214	1	1	1	1	707	80.1	6.39	509		1		0	0				100				3.00121e-17									900	Not Found	Not Found	Not Found	Not Found	High	1
FALSE	High	Master Protein	D6RBQ6	Ubiquitin carboxyl-terminal hydrolase 17-like protein 17 OS=Homo sapiens OX=9606 GN=USP17L17 PE=3 SV=1	0.003	3.209	1	1	4	1	530	59.6	7.99	1859		1		0	0	0.167	0.5	0.392	0.115	0.412297	0.293214	0.0164947	0.734433	0	0	0	0	34.4	103	80.7	206.2	23.7	High	Peak Found	Peak Found	Peak Found	High	1
FALSE	High	Master Protein	Q14C86	GTPase-activating protein and VPS9 domain-containing protein 1 OS=Homo sapiens OX=9606 GN=GAPVD1 PE=1 SV=2	0.003	3.207	1	1	1	1	1478	164.9	5.22	258		1		0	0				100				3.00121e-17									900	Not Found	Not Found	Not Found	Not Found	High	1
FALSE	High	Master Protein	A0A0G2JP48	Putative golgin subfamily A member 8F/8G OS=Homo sapiens OX=9606 GN=GOLGA8G PE=4 SV=1	0.003	3.188	1	1	1	1	648	72.9	7.15	515		1		0	0	0.033	0.037	0.049	0.052	0.0166969	3.31958e-12	5.41217e-17	0.534996	0	0	0	0	25.3	28.4	37.4	769.2	39.7	Peak Found	Peak Found	Peak Found	High	Peak Found	1
FALSE	High	Master Protein	P56199	Integrin alpha-1 OS=Homo sapiens OX=9606 GN=ITGA1 PE=1 SV=2	0.003	3.188	1	2	4	2	1179	130.8	6.29	1101		2		0	0	0.453	1.085	1.094	0.01	0.910113	0.992008	0.975089	3.00121e-17	0	4.04	0		42	232.4	101.5	213.4		Peak Found	High	Peak Found	High	Not Found	1
FALSE	High	Master Protein	Q08945	FACT complex subunit SSRP1 OS=Homo sapiens OX=9606 GN=SSRP1 PE=1 SV=1	0.003	3.17	2	1	1	1	709	81	6.87	416		1		0	0	0.01	0.01	1.6	1.693	5.33141e-17	6.62708e-17	0.867063	0.688813			0	0			242.7	151.7	256.8	Not Found	Not Found	Peak Found	Peak Found	High	1
FALSE	High	Master Protein	P31949	Protein S100-A11 OS=Homo sapiens OX=9606 GN=S100A11 PE=1 SV=2	0.003	3.153	10	1	1	1	105	11.7	7.12	460		1		0	0	0.01	0.01	0.869	0.01	5.33141e-17	6.62708e-17	0.801744	3.00121e-17			0				312.1	359.1		Not Found	Not Found	Peak Found	High	Not Found	1
FALSE	High	Master Protein	P12111	Collagen alpha-3(VI) chain OS=Homo sapiens OX=9606 GN=COL6A3 PE=1 SV=5	0.003	3.139	1	2	2	2	3177	343.5	6.68	169		2		0	0	0.461		0.33	0.162	0.916708		0.0200547	0.767616	0		0	0	135	11.9	151.4	92.7	52.8	Peak Found	Peak Found	High	High	Peak Found	1
FALSE	High	Master Protein	P48651	Phosphatidylserine synthase 1 OS=Homo sapiens OX=9606 GN=PTDSS1 PE=1 SV=1	0.003	3.136	3	1	6	1	473	55.5	8.43	1254		1		0	0	0.468	0.201	0.522	0.162	0.903614	0.00161431	0.251142	0.72905	0	0	0	0	99.6	42.8	111.1	212.8	34.4	High	Peak Found	Peak Found	High	Peak Found	1
FALSE	High	Master Protein	C9JC24	WD repeat-containing protein 48 (Fragment) OS=Homo sapiens OX=9606 GN=WDR48 PE=1 SV=1	0.003	3.125	7	1	1	1	162	17.7	8.34	426		1		0	0				100				3.00121e-17									86.2	Not Found	Not Found	Not Found	Not Found	Peak Found	1
FALSE	High	Master Protein	Q99459	Cell division cycle 5-like protein OS=Homo sapiens OX=9606 GN=CDC5L PE=1 SV=2	0.003	3.114	1	1	1	1	802	92.2	8.18	507		1		0	0				100				3.00121e-17									900	Not Found	Not Found	Not Found	Not Found	High	1
FALSE	High	Master Protein	A0A087WTD7	A-kinase anchor protein 13 OS=Homo sapiens OX=9606 GN=AKAP13 PE=1 SV=1	0.003	3.113	1	1	7	1	1429	161.1	7.09	3835		1		0	0	0.519	1.132	1.271	0.206	0.972633	0.986398	0.954707	0.837436	0	0	0	0	70.3	153.5	172.3	135.6	27.9	High	High	High	Peak Found	Peak Found	1
FALSE	High	Master Protein	Q5T3Q7	HEAT repeat-containing protein 1 OS=Homo sapiens OX=9606 GN=HEATR1 PE=1 SV=1	0.003	3.102	0	1	4	1	2063	233.1	6.6	1509		1		0	0	0.737	0.889	1.332	0.388	0.999286	0.950576	0.962067	0.982616	0	0	0	0	96.7	116.7	174.7	131.2	51	Peak Found	High	High	Peak Found	Peak Found	1
FALSE	High	Master Protein	Q9UH65	Switch-associated protein 70 OS=Homo sapiens OX=9606 GN=SWAP70 PE=1 SV=1	0.003	3.061	5	2	5	2	585	69	5.87	552		2		0	0	0.202	0.122	0.13	0.014	0.512616	1.88822e-05	4.63088e-08	0.169746	0	0	0	0	66.4	34.8	56.2	285	3.9	High	Peak Found	High	Peak Found	Peak Found	1
FALSE	High	Master Protein	Q7KZ85	Transcription elongation factor SPT6 OS=Homo sapiens OX=9606 GN=SUPT6H PE=1 SV=2	0.003	3.06	1	1	1	1	1726	198.9	4.91	477		1		0	0	0.01	1.099	1.212	0.01	5.33141e-17	0.986398	0.993395	3.00121e-17		0	0			228	251.4	207.4		Not Found	High	Peak Found	Peak Found	Not Found	1
FALSE	High	Master Protein	Q9NW82	WD repeat-containing protein 70 OS=Homo sapiens OX=9606 GN=WDR70 PE=1 SV=1	0.003	3.057	2	1	1	1	654	73.2	6.33	559		1		0	0				100				3.00121e-17									900	Not Found	Not Found	Not Found	Not Found	High	1
FALSE	High	Master Protein	E9PEX6	Dihydrolipoyl dehydrogenase OS=Homo sapiens OX=9606 GN=DLD PE=1 SV=1	0.003	3.035	2	1	3	1	486	51.8	7.96	1477		1		0	0	8.123	0.315	2.96	9.109	0.220773	0.0341658	0.138926	0.620129	0	0	0	0	250.1	9.7	91.1	30.8	280.5	High	Peak Found	Peak Found	Peak Found	High	1
FALSE	High	Master Protein	P54868	Hydroxymethylglutaryl-CoA synthase, mitochondrial OS=Homo sapiens OX=9606 GN=HMGCS2 PE=1 SV=1	0.004	3.022	2	1	5	1	508	56.6	8.16	1340		1		0	0	0.324	0.729	1.143	0.173	0.725904	0.803904	0.99817	0.791014	0	0	0	0	47.9	107.8	168.9	147.8	25.5	High	High	High	Peak Found	Peak Found	1
FALSE	High	Master Protein	Q86X27	Ras-specific guanine nucleotide-releasing factor RalGPS2 OS=Homo sapiens OX=9606 GN=RALGPS2 PE=1 SV=1	0.004	3.015	3	2	3	2	583	65.1	8.73	623		2		0	0	1.758	2.15	2.785	1.066	0.972405	0.332863	0.0693071	0.971083	0.69	0	26.34	47.55	136.9	61.1	210	77.9	80.1	Peak Found	Peak Found	Peak Found	High	High	1
FALSE	High	Master Protein	A0A0C4DGV9	DNA ligase OS=Homo sapiens OX=9606 GN=LIG4 PE=1 SV=1	0.005	2.997	1	1	1	1	844	96.2	7.69	551		1		0	0	100	100	100	100	5.33141e-17	6.62708e-17	5.41217e-17	3.00121e-17					166.5	67.4	80		216.1	Peak Found	Peak Found	Peak Found	Not Found	High	1
FALSE	High	Master Protein	P01023	Alpha-2-macroglobulin OS=Homo sapiens OX=9606 GN=A2M PE=1 SV=3	0.005	2.993	0	1	4	1	1474	163.2	6.46	1477		1		0	0	0.574	1.115	0.921	0.269	0.975704	0.986398	0.847422	0.899357	0	0	0	0	80.4	156.1	129	140	37.6	High	Peak Found	High	High	Peak Found	1
FALSE	High	Master Protein	A0A087WVN4	Farnesyl pyrophosphate synthase (Fragment) OS=Homo sapiens OX=9606 GN=FDPS PE=1 SV=1	0.005	2.991	7	1	1	1	274	31.8	7.28	223		1		0	0	0.36	0.919	0.587	0.278	0.752363	0.973513	0.310088	0.913451	0	0	0	0	66.8	170.7	109	185.7	51.7	Peak Found	High	Peak Found	Peak Found	Peak Found	1
FALSE	High	Master Protein	A0A087WZ13	Ribonucleoprotein PTB-binding 1 OS=Homo sapiens OX=9606 GN=RAVER1 PE=1 SV=1	0.005	2.99	1	1	1	1	739	77.8	8.84	500		1		0	0	100	100		100	5.33141e-17	6.62708e-17		3.00121e-17					104.1	133.5			544	Peak Found	Peak Found	Not Found	Not Found	High	1
FALSE	High	Master Protein	Q8N3E9	1-phosphatidylinositol 4,5-bisphosphate phosphodiesterase delta-3 OS=Homo sapiens OX=9606 GN=PLCD3 PE=1 SV=3	0.005	2.987	2	1	1	1	789	89.2	6.98	291		1		0	0	100	100		100	5.33141e-17	6.62708e-17		3.00121e-17					163.8	76.3			147.6	Peak Found	Peak Found	Not Found	Not Found	High	1
FALSE	High	Master Protein	Q9Y5S2	Serine/threonine-protein kinase MRCK beta OS=Homo sapiens OX=9606 GN=CDC42BPB PE=1 SV=2	0.005	2.971	0	1	6	1	1711	194.2	6.37	3135		1		0	0	2.407	1.848	1.516	1.687	0.86046	0.520564	0.786889	0.956927	0	0	0	0	117.1	89.9	73.7	48.6	82.1	High	High	Peak Found	Peak Found	High	1
FALSE	High	Master Protein	G3V3R6	Galectin OS=Homo sapiens OX=9606 GN=LGALS3 PE=1 SV=1	0.005	2.956	5	1	1	1	233	24.1	9.39	430		1		0	0	0.01	2.056	0.01	0.01	5.33141e-17	0.386122	5.41217e-17	3.00121e-17		0				499.3		242.9		Not Found	High	Not Found	Peak Found	Not Found	1
FALSE	High	Master Protein	B4DTF2	Annexin OS=Homo sapiens OX=9606 GN=ANXA8L1 PE=1 SV=1	0.005	2.943	6	1	1	1	270	30.5	6.8	321		1		0	0	0.01	0.01	0.01	0.01	5.33141e-17	6.62708e-17	5.41217e-17	3.00121e-17								839.3		Not Found	Not Found	Not Found	High	Not Found	1
FALSE	High	Master Protein	Q9H0U9	Testis-specific Y-encoded-like protein 1 OS=Homo sapiens OX=9606 GN=TSPYL1 PE=1 SV=3	0.005	2.94	2	1	1	1	437	49.2	5.45	494		1		0	0	100		100	100	5.33141e-17		5.41217e-17	3.00121e-17					145.4		129.6		121.1	Peak Found	Not Found	Peak Found	Not Found	Peak Found	1
FALSE	High	Master Protein	Q96RT6	cTAGE family member 2 OS=Homo sapiens OX=9606 GN=CTAGE1 PE=1 SV=2	0.005	2.936	2	1	1	1	745	85.2	6.16	446		1		0	0				100				3.00121e-17									900	Not Found	Not Found	Not Found	Not Found	High	1
FALSE	High	Master Protein	Q96QU6	1-aminocyclopropane-1-carboxylate synthase-like protein 1 OS=Homo sapiens OX=9606 GN=ACCS PE=1 SV=1	0.005	2.933	1	1	2	1	501	57.3	6.43	859		1		0	0	1.061	1.037	1.202	0.909	0.999286	0.997378	0.99817	0.967482	0	0	0	0	106.4	104.1	120.6	100.3	91.2	High	Peak Found	High	Peak Found	Peak Found	1
FALSE	High	Master Protein	Q8N357	Solute carrier family 35 member F6 OS=Homo sapiens OX=9606 GN=SLC35F6 PE=1 SV=1	0.005	2.875	3	1	2	1	371	40.2	6.93	591		1		0	0	1.338	1.06	0.764	0.01	0.977307	0.998137	0.69914	3.00121e-17	0	0	0		141.5	112.1	80.8	105.7		High	Peak Found	Peak Found	Peak Found	Not Found	1
FALSE	High	Master Protein	O95479	GDH/6PGL endoplasmic bifunctional protein OS=Homo sapiens OX=9606 GN=H6PD PE=1 SV=2	0.005	2.866	1	1	2	1	791	88.8	7.3	542		1		0	0	100	100		100	5.33141e-17	6.62708e-17		3.00121e-17					247.4	133.8			146.5	Peak Found	Peak Found	Not Found	Not Found	Peak Found	1
FALSE	High	Master Protein	E7EQ64	Trypsin-1 OS=Homo sapiens OX=9606 GN=PRSS1 PE=1 SV=1	0.005	2.857	3	1	7	1	261	28.1	7.25	3311		1		0	0	0.789	1.728	2.903	0.551	0.999286	0.613252	0.0422962	0.982616	0	0	0	0	59	129.1	216.9	74.7	41.1	High	High	Peak Found	High	Peak Found	1
FALSE	High	Master Protein	O15492	Regulator of G-protein signaling 16 OS=Homo sapiens OX=9606 GN=RGS16 PE=1 SV=2	0.005	2.849	3	1	3	1	202	22.7	6.64	1228		1		0	0	0.396	0.821	0.776	0.138	0.870407	0.898728	0.586169	0.745538	0	0	0	0	69.1	143.4	135.4	174.6	24.1	Peak Found	High	Peak Found	High	Peak Found	1
FALSE	High	Master Protein	O75694	Nuclear pore complex protein Nup155 OS=Homo sapiens OX=9606 GN=NUP155 PE=1 SV=1	0.005	2.835	1	1	1	1	1391	155.1	6.16	358		1		0	0	100	100		100	5.33141e-17	6.62708e-17		3.00121e-17					321.1	281			297.9	Peak Found	Peak Found	Not Found	Not Found	High	1
FALSE	High	Master Protein	P06702	Protein S100-A9 OS=Homo sapiens OX=9606 GN=S100A9 PE=1 SV=1	0.005	2.829	11	1	1	1	114	13.2	6.13	369		1		0	0	0.808	0.422	0.785	0.227	0.999286	0.152945	0.616772	0.865092	0	0	0	0	162.3	84.8	157.6	200.7	45.5	High	Peak Found	Peak Found	Peak Found	Peak Found	1
FALSE	High	Master Protein	O75936	Gamma-butyrobetaine dioxygenase OS=Homo sapiens OX=9606 GN=BBOX1 PE=1 SV=1	0.005	2.825	6	1	1	1	387	44.7	6.74	31		1		0	0																		Not Found	Not Found	Not Found	Not Found	Not Found	1
FALSE	High	Master Protein	O94886	CSC1-like protein 1 OS=Homo sapiens OX=9606 GN=TMEM63A PE=1 SV=3	0.005	2.812	1	1	4	1	807	92.1	7.27	1184		1		0	0	100	100		100	5.33141e-17	6.62708e-17		3.00121e-17					95.6	228.7			116.7	Peak Found	High	Not Found	High	Peak Found	1
FALSE	High	Master Protein	Q8TCY9	Up-regulator of cell proliferation OS=Homo sapiens OX=9606 GN=URGCP PE=1 SV=2	0.005	2.809	2	1	1	1	931	104.9	6.42	370		1		0	0				100				3.00121e-17									900	Not Found	Not Found	Not Found	Not Found	High	1
FALSE	High	Master Protein	G5E9Z2	Cleft lip and palate transmembrane protein 1-like protein OS=Homo sapiens OX=9606 GN=CLPTM1L PE=1 SV=1	0.005	2.807	4	1	2	1	369	43.3	8.79	607		1		0	0	1.464	1.48	1.431	0.813	0.97495	0.826764	0.932017	0.974133	0	0	0	0	119.9	121.2	117.3	81.9	66.6	Peak Found	High	Peak Found	Peak Found	Peak Found	1
FALSE	High	Master Protein	Q14114	Low-density lipoprotein receptor-related protein 8 OS=Homo sapiens OX=9606 GN=LRP8 PE=1 SV=4	0.005	2.797	1	1	1	1	963	105.6	5.05	389		1		0	0	0.869	1.134	1.199	0.544	0.999286	0.986398	0.997039	0.996927	0	0	0	0	92.7	121	127.9	106.7	58	Peak Found	Peak Found	Peak Found	Peak Found	Peak Found	1
FALSE	High	Master Protein	P54577	Tyrosine--tRNA ligase, cytoplasmic OS=Homo sapiens OX=9606 GN=YARS1 PE=1 SV=4	0.005	2.797	1	1	1	1	528	59.1	7.05	415		1		0	0	0.494	1.282	0.849	0.164	0.916708	0.941122	0.822763	0.72905	0	0	0	0	65.4	169.6	112.4	132.3	21.7	Peak Found	Peak Found	Peak Found	Peak Found	Peak Found	1
FALSE	High	Master Protein	F5H6B2	Cell surface hyaluronidase OS=Homo sapiens OX=9606 GN=CEMIP2 PE=1 SV=1	0.005	2.796	2	1	3	1	580	64.7	6.83	905		1		0	0	0.408	0.755	1.356	0.01	0.872556	0.826764	0.936868	3.00121e-17	0	0	0		64.5	119.2	214.1	157.9		Peak Found	High	Peak Found	High	Not Found	1
FALSE	High	Master Protein	O43684	Mitotic checkpoint protein BUB3 OS=Homo sapiens OX=9606 GN=BUB3 PE=1 SV=1	0.005	2.793	2	1	1	1	328	37.1	6.84	571		1		0	0	100	100	100	100	5.33141e-17	6.62708e-17	5.41217e-17	3.00121e-17					100.8	125.4	76		434.3	Peak Found	Peak Found	Peak Found	Not Found	High	1
FALSE	High	Master Protein	P06213	Insulin receptor OS=Homo sapiens OX=9606 GN=INSR PE=1 SV=4	0.005	2.782	1	1	1	1	1382	156.2	6.2	426		1		0	0	100			100	5.33141e-17			3.00121e-17					225.3				508.6	Peak Found	Not Found	Not Found	Not Found	High	1
FALSE	High	Master Protein	Q14112	Nidogen-2 OS=Homo sapiens OX=9606 GN=NID2 PE=1 SV=3	0.005	2.772	1	1	1	1	1375	151.2	5.29	435		1		0	0	0.713	0.981	0.988	0.345	0.999286	0.986398	0.919134	0.964825	0	0	0	0	94.6	130.2	131	132.7	45.8	Peak Found	Peak Found	Peak Found	Peak Found	Peak Found	1
FALSE	High	Master Protein	Q15828	Cystatin-M OS=Homo sapiens OX=9606 GN=CST6 PE=1 SV=1	0.005	2.768	7	1	1	1	149	16.5	8.09	362		1		0	0	0.01	0.01	0.01	0.047	5.33141e-17	6.62708e-17	5.41217e-17	0.299474				0				469.7	22	Not Found	Not Found	Not Found	High	Peak Found	1
FALSE	High	Master Protein	E9PMT2	LIM domain only protein 7 OS=Homo sapiens OX=9606 GN=LMO7 PE=1 SV=1	0.005	2.763	1	1	2	1	1398	159.9	7.78	631		1		0	0				100				3.00121e-17									900	Not Found	Not Found	Not Found	Not Found	High	1
FALSE	High	Master Protein	A0A087X1I3	Flavoprotein subunit of complex II OS=Homo sapiens OX=9606 GN=SDHA PE=1 SV=1	0.005	2.758	1	1	2	1	519	56.6	7.5	841		1		0	0	0.596	0.82	1.16	0.01	0.977307	0.896085	0.998113	3.00121e-17	0	0	0		88	121.1	171.3	147.7		Peak Found	Peak Found	Peak Found	Peak Found	Not Found	1
FALSE	High	Master Protein	J3KNR0	Non-specific serine/threonine protein kinase OS=Homo sapiens OX=9606 GN=MARK3 PE=1 SV=2	0.005	2.734	1	1	2	1	776	86.9	9.52	1088		1		0	0	12.415	5.371	3.941	57.14	0.0880084	0.00198163	0.0423095	0.197715	0	0	0	0	109.7	47.5	34.8	8.8	504.8	High	High	Peak Found	Peak Found	Peak Found	1
FALSE	High	Master Protein	A0A087X0M4	Kanadaptin OS=Homo sapiens OX=9606 GN=SLC4A1AP PE=1 SV=1	0.005	2.731	1	1	2	1	742	82.8	5.1	925		1		0	0				100				3.00121e-17									900	Not Found	Not Found	Not Found	Not Found	High	1
FALSE	High	Master Protein	P43034	Platelet-activating factor acetylhydrolase IB subunit alpha OS=Homo sapiens OX=9606 GN=PAFAH1B1 PE=1 SV=2	0.005	2.72	2	1	1	1	410	46.6	7.37	554		1		0	0	100	100		100	5.33141e-17	6.62708e-17		3.00121e-17					90.3	56			371.8	Peak Found	Peak Found	Not Found	Not Found	High	1
FALSE	High	Master Protein	E9PGM4	1,4-alpha-glucan branching enzyme OS=Homo sapiens OX=9606 GN=GBE1 PE=1 SV=1	0.005	2.717	2	1	2	1	661	75.9	6.58	392		1		0	0	0.398	1.054	1.066	0.084	0.887933	0.999591	0.977737	0.64644	0	0	0	0	63.1	167	168.9	158.5	13.4	Peak Found	High	Peak Found	Peak Found	Peak Found	1
FALSE	High	Master Protein	H0YFG2	Peptidyl-prolyl cis-trans isomerase FKBP4 (Fragment) OS=Homo sapiens OX=9606 GN=FKBP4 PE=1 SV=1	0.005	2.712	10	1	4	1	84	9.6	9.72	1632		1		0	0	100	100		100	5.33141e-17	6.62708e-17		3.00121e-17					176.5	79.7			249.2	High	Peak Found	Not Found	Not Found	High	1
FALSE	High	Master Protein	Q5JSH3	WD repeat-containing protein 44 OS=Homo sapiens OX=9606 GN=WDR44 PE=1 SV=1	0.005	2.7	1	1	1	1	913	101.3	5.45	460		1		0	0				100				3.00121e-17									900	Not Found	Not Found	Not Found	Not Found	High	1
FALSE	High	Master Protein	Q6RW13	Type-1 angiotensin II receptor-associated protein OS=Homo sapiens OX=9606 GN=AGTRAP PE=1 SV=1	0.005	2.691	14	1	1	1	159	17.4	6.14	280		1		0	0				100				3.00121e-17									900	Not Found	Not Found	Not Found	Not Found	High	1
FALSE	High	Master Protein	Q99985	Semaphorin-3C OS=Homo sapiens OX=9606 GN=SEMA3C PE=2 SV=2	0.005	2.677	1	1	3	1	751	85.2	8.69	795		1		0	0	3.421	1.841	2.273	2.103	0.398273	0.528155	0.451339	0.623653	0	0	0	0	154.7	83.2	102.8	45.2	95.1	High	Peak Found	Peak Found	Peak Found	Peak Found	1
FALSE	High	Master Protein	P69905	Hemoglobin subunit alpha OS=Homo sapiens OX=9606 GN=HBA1 PE=1 SV=2	0.005	2.663	21	1	1	1	142	15.2	8.68	19		1		0	0	0.01	0.01	0.422	0.01	5.33141e-17	6.62708e-17	0.096812	3.00121e-17			0				267	633		Not Found	Not Found	High	Peak Found	Not Found	1
FALSE	High	Master Protein	E7EN77	Condensin complex subunit 1 (Fragment) OS=Homo sapiens OX=9606 GN=NCAPD2 PE=1 SV=2	0.005	2.66	1	1	2	1	919	102.6	5.94	615		1		0	0	0.237	0.99	0.01	0.281	0.521305	0.986398	5.41217e-17	0.905869	0	0		0	57.5	239.8		242.2	68.2	High	High	Not Found	Peak Found	Peak Found	1
FALSE	High	Master Protein	Q8IY47	Kelch repeat and BTB domain-containing protein 2 OS=Homo sapiens OX=9606 GN=KBTBD2 PE=1 SV=2	0.005	2.657	1	1	8	1	623	71.3	5.62	3551		1		0	0	0.286	0.495	0.75	0.067	0.674648	0.287023	0.545419	0.519939	0	0	0	0	10.4	18	27.2	36.3	2.4	Peak Found	Peak Found	Peak Found	High	Peak Found	1
FALSE	High	Master Protein	O14684	Prostaglandin E synthase OS=Homo sapiens OX=9606 GN=PTGES PE=1 SV=2	0.005	2.655	7	1	1	1	152	17.1	9.5	294		1		0	0	0.01	1.462	1.314	0.598	5.33141e-17	0.836169	0.972863	0.982616		0	0	0		268.6	241.3	183.7	109.9	Not Found	High	Peak Found	Peak Found	Peak Found	1
FALSE	High	Master Protein	P19827	Inter-alpha-trypsin inhibitor heavy chain H1 OS=Homo sapiens OX=9606 GN=ITIH1 PE=1 SV=3	0.005	2.648	1	1	1	1	911	101.3	6.79	490		1		0	0	0.494	0.911	1.014	0.425	0.962576	0.966696	0.950827	0.971083	0	0	0	0	72.2	133.2	148.3	146.2	62.2	Peak Found	Peak Found	Peak Found	Peak Found	High	1
FALSE	High	Master Protein	Q12929	Epidermal growth factor receptor kinase substrate 8 OS=Homo sapiens OX=9606 GN=EPS8 PE=1 SV=1	0.005	2.63	1	1	1	1	822	91.8	7.5	368		1		0	0	100	100	100	100	5.33141e-17	6.62708e-17	5.41217e-17	3.00121e-17					39.8	90.3	117.8		242.3	Peak Found	Peak Found	Peak Found	Not Found	High	1
FALSE	High	Master Protein	P35237	Serpin B6 OS=Homo sapiens OX=9606 GN=SERPINB6 PE=1 SV=3	0.005	2.625	2	1	1	1	376	42.6	5.27	333		1		0	0	0.773	1.099	0.907	0.556	0.999286	0.986398	0.870206	0.999163	0	0	0	0	95.8	136.3	112.4	124	68.9	Peak Found	Peak Found	Peak Found	Peak Found	Peak Found	1
FALSE	High	Master Protein	Q5VZE5	N-alpha-acetyltransferase 35, NatC auxiliary subunit OS=Homo sapiens OX=9606 GN=NAA35 PE=1 SV=1	0.005	2.625	1	1	1	1	725	83.6	7.05	645		1		0	0				100				3.00121e-17									719.4	Not Found	Not Found	Not Found	Not Found	High	1
FALSE	High	Master Protein	Q5SRE5	Nucleoporin NUP188 homolog OS=Homo sapiens OX=9606 GN=NUP188 PE=1 SV=1	0.006	2.604	1	1	1	1	1749	195.9	6.73	261		1		0	0	100	100		100	5.33141e-17	6.62708e-17		3.00121e-17					249.5	67.9			54.5	Peak Found	Peak Found	Not Found	Not Found	Peak Found	1
FALSE	High	Master Protein	A1A4S6	Rho GTPase-activating protein 10 OS=Homo sapiens OX=9606 GN=ARHGAP10 PE=1 SV=1	0.006	2.602	2	1	1	1	786	89.3	7.18	352		1		0	0				100				3.00121e-17									900	Not Found	Not Found	Not Found	Not Found	High	1
FALSE	High	Master Protein	Q9NVI1	Fanconi anemia group I protein OS=Homo sapiens OX=9606 GN=FANCI PE=1 SV=4	0.006	2.584	1	1	2	1	1328	149.2	6.74	668		1		0	0	3.744	3.294	2.579	1.714	0.412356	0.0500821	0.287812	0.734433	0	0	0	0	146.9	129.3	101.2	39.2	67.3	Peak Found	Peak Found	Peak Found	Peak Found	Peak Found	1
FALSE	High	Master Protein	A0A286YF31	NF-kappa-B inhibitor delta OS=Homo sapiens OX=9606 GN=NFKBID PE=1 SV=1	0.008	2.583	2	1	6	1	455	48.7	7.28	2693		1		0	0	1.449	0.717	0.986	0.154	0.988291	0.777373	0.932017	0.780677	0	0	0	0	132.2	65.4	90	91.2	14	High	High	Peak Found	High	Peak Found	1
FALSE	High	Master Protein	Q96N66	Lysophospholipid acyltransferase 7 OS=Homo sapiens OX=9606 GN=MBOAT7 PE=1 SV=2	0.008	2.576	3	1	3	1	472	52.7	8.97	707		1		0	0	1.698	2.579	1.999	3.195	0.922629	0.167276	0.543578	0.745538	0	0	0	0	88.1	133.9	103.7	51.9	165.8	High	High	Peak Found	Peak Found	Peak Found	1
FALSE	High	Master Protein	O75695	Protein XRP2 OS=Homo sapiens OX=9606 GN=RP2 PE=1 SV=4	0.008	2.565	2	1	3	1	350	39.6	5.12	1442		1		0	0	0.81	1.101	1.055	0.138	0.999286	0.986398	0.972863	0.758739	0	0	0	0	98.7	134.2	128.6	121.9	16.8	Peak Found	Peak Found	Peak Found	High	High	1
FALSE	High	Master Protein	Q8TB61	Adenosine 3'-phospho 5'-phosphosulfate transporter 1 OS=Homo sapiens OX=9606 GN=SLC35B2 PE=1 SV=1	0.008	2.561	3	1	4	1	432	47.5	9.16	1058		1		0	0	0.493	0.564	0.607	0.493	0.962576	0.438069	0.244578	0.982616	0	0	0	0	78.2	89.6	96.4	158.8	78.2	Peak Found	Peak Found	Peak Found	High	Peak Found	1
FALSE	High	Master Protein	K7EMN2	6-phosphogluconate dehydrogenase, decarboxylating (Fragment) OS=Homo sapiens OX=9606 GN=PGD PE=1 SV=1	0.008	2.561	11	1	3	1	160	17.3	8.44	642		1		0	0	0.559	0.645	0.814	0.216	0.97386	0.617682	0.715037	0.828969	0	0	0	0	92.7	107.1	135.1	166	35.8	Peak Found	Peak Found	High	Peak Found	Peak Found	1
FALSE	High	Master Protein	U3KPZ7	Uncharacterized protein OS=Homo sapiens OX=9606 PE=1 SV=1	0.008	2.552	1	1	1	1	1027	114.5	9.45	292		1		0	0		100		100		6.62708e-17		3.00121e-17						198.4			701.6	Not Found	Peak Found	Not Found	Not Found	High	1
FALSE	High	Master Protein	Q8NBJ5	Procollagen galactosyltransferase 1 OS=Homo sapiens OX=9606 GN=COLGALT1 PE=1 SV=1	0.008	2.544	2	1	1	1	622	71.6	7.31	256		1		0	0	0.888	0.815	0.961	0.01	0.999286	0.892971	0.90661	3.00121e-17	0	0	0		130.4	119.6	141.2	146.8		Peak Found	Peak Found	Peak Found	High	Not Found	1
FALSE	High	Master Protein	A0A0C4DGI3	Citrate synthase OS=Homo sapiens OX=9606 GN=CS PE=1 SV=1	0.008	2.529	4	1	1	1	400	44.7	7.18	205		1		0	0	0.566	0.783	0.967	0.179	0.962576	0.862357	0.92938	0.741765	0	0	0	0	78.5	108.7	134.1	138.8	24.9	Peak Found	Peak Found	Peak Found	Peak Found	Peak Found	1
FALSE	High	Master Protein	Q15629	Translocating chain-associated membrane protein 1 OS=Homo sapiens OX=9606 GN=TRAM1 PE=1 SV=3	0.008	2.528	2	1	3	1	374	43	9.63	1114		1		0	0	0.889	1.126	1.158	0.31	0.999286	0.986398	0.995782	0.941302	0	0	0	0	112.3	142.3	146.3	126.4	39.1	Peak Found	High	Peak Found	High	Peak Found	1
FALSE	High	Master Protein	A0A0C4DFM1	Transmembrane 9 superfamily member OS=Homo sapiens OX=9606 GN=TM9SF4 PE=1 SV=1	0.008	2.525	1	1	1	1	625	72.5	6.65	334		1		0	0	1.574	1.147	1.074	0.926	0.916708	0.986398	0.972863	0.888745	0	0	0	0	139.8	101.9	95.4	88.8	82.2	Peak Found	Peak Found	Peak Found	Peak Found	Peak Found	1
FALSE	High	Master Protein	P51795-1	Isoform 2 of H(+)/Cl(-) exchange transporter 5 OS=Homo sapiens OX=9606 GN=CLCN5	0.008	2.52	1	1	4	1	746	83.1	6.81	1785		1		0	0	1.062	1.188	1.68	0.584	0.999286	0.984381	0.784839	0.984872	0	0	0	0	103.9	116.3	164.4	97.9	57.1	Peak Found	High	Peak Found	High	Peak Found	1
FALSE	High	Master Protein	A0A3B3ITK7	Phosphoglucomutase-1 OS=Homo sapiens OX=9606 GN=PGM1 PE=1 SV=1	0.008	2.513	3	1	1	1	584	63.9	6.76	222		1		0	0	0.638	0.97	0.01	0.01	0.985423	0.986398	5.41217e-17	3.00121e-17	0	0			112.5	171.1		176.4		Peak Found	Peak Found	Not Found	Peak Found	Not Found	1
FALSE	High	Master Protein	A0A5F9ZHN5	Ankyrin-2 OS=Homo sapiens OX=9606 GN=ANK2 PE=1 SV=1	0.008	2.496	0	1	8	1	3903	427.6	5.1	3701		1		0	0	7.26	3.153	3.154	17.053	0.261801	0.0631266	0.0205131	0.468193	0	0	0	0	132.4	57.5	57.5	18.2	311.1	High	High	High	Peak Found	High	1
FALSE	High	Master Protein	P49321	Nuclear autoantigenic sperm protein OS=Homo sapiens OX=9606 GN=NASP PE=1 SV=2	0.008	2.496	1	1	1	1	788	85.2	4.3	341		1		0	0	0.35	0.459	0.854	2.183	0.623529	0.219141	0.827984	0.734433	0	0	0	0	61.8	80.9	150.6	176.4	385.1	Peak Found	Peak Found	Peak Found	Peak Found	High	1
FALSE	High	Master Protein	B4DQ75	Death-associated protein 1 OS=Homo sapiens OX=9606 GN=DAP PE=1 SV=1	0.008	2.496	3	1	3	1	204	23.2	9.54	1173		1		0	0	0.583	0.726	0.834	0.258	0.980991	0.797082	0.700408	0.900644	0	0	0	0	68.3	85	97.7	117.2	30.2	Peak Found	High	Peak Found	Peak Found	Peak Found	1
FALSE	High	Master Protein	Q6ZMI0	Protein phosphatase 1 regulatory subunit 21 OS=Homo sapiens OX=9606 GN=PPP1R21 PE=1 SV=1	0.008	2.496	1	1	1	1	780	88.3	6.84	462		1		0	0				100				3.00121e-17									900	Not Found	Not Found	Not Found	Not Found	High	1
FALSE	High	Master Protein	Q6E0U4	Dermokine OS=Homo sapiens OX=9606 GN=DMKN PE=1 SV=3	0.008	2.473	1	1	2	1	476	47.1	7.28	678		1		0	0	0.01	0.199	0.256	0.01	5.33141e-17	0.00152499	0.00285115	3.00121e-17		0	0			50.8	65.3	255		Not Found	Peak Found	Peak Found	High	Not Found	1
FALSE	High	Master Protein	A0A0B4J1S8	Phosphatidylinositol 4-kinase beta OS=Homo sapiens OX=9606 GN=PI4KB PE=1 SV=1	0.009	2.47	1	1	1	1	828	92.7	6.32	393		1		0	0				100				3.00121e-17									900	Not Found	Not Found	Not Found	Not Found	High	1
FALSE	High	Master Protein	F5GX87	Cytochrome b ascorbate-dependent protein 3 (Fragment) OS=Homo sapiens OX=9606 GN=CYB561A3 PE=4 SV=1	0.009	2.47	5	1	2	1	124	13.7	9.83	834		1		0	0	0.737	0.889	1.332	0.388	0.999286	0.950576	0.962067	0.982616	0	0	0	0	96.7	116.7	174.7	131.2	51	High	Peak Found	Peak Found	Peak Found	Peak Found	1
FALSE	High	Master Protein	E9PKE4	Solute carrier family 52, riboflavin transporter, member 2 (Fragment) OS=Homo sapiens OX=9606 GN=SLC52A2 PE=1 SV=2	0.009	2.467	5	1	2	1	175	17.7	4.83	742		1		0	0	0.987	1.139	1.343	0.558	0.999286	0.986398	0.949586	0.989021	0	0	0	0	102.9	118.7	140	104.2	58.2	Peak Found	High	Peak Found	Peak Found	Peak Found	1
FALSE	High	Master Protein	Q16610	Extracellular matrix protein 1 OS=Homo sapiens OX=9606 GN=ECM1 PE=1 SV=2	0.009	2.449	2	1	2	1	540	60.6	6.71	334		1		0	0	0.49	0.775	0.939	0.31	0.903614	0.858154	0.906637	0.941302	0	0	0	0	58.7	92.8	112.5	119.7	37.1	Peak Found	Peak Found	Peak Found	High	Peak Found	1
FALSE	High	Master Protein	D6RG19	Ribosomal protein L37 OS=Homo sapiens OX=9606 GN=RPL37 PE=1 SV=1	0.009	2.442	9	1	6	1	82	9.7	11.53	1854		1		0	0	0.542	0.653	0.01	0.732	0.965675	0.636784	5.41217e-17	0.982616	0	0		0	89.5	107.9		165.1	120.8	High	High	Not Found	High	Peak Found	1
FALSE	High	Master Protein	P40189	Interleukin-6 receptor subunit beta OS=Homo sapiens OX=9606 GN=IL6ST PE=1 SV=2	0.009	2.438	1	1	2	1	918	103.5	5.95	390		1		0	0	0.01	0.704	0.01	0.01	5.33141e-17	0.747067	5.41217e-17	3.00121e-17		0				194		275.7		Not Found	Peak Found	Not Found	High	Not Found	1
FALSE	High	Master Protein	O95140	Mitofusin-2 OS=Homo sapiens OX=9606 GN=MFN2 PE=1 SV=3	0.009	2.437	1	1	3	1	757	86.3	6.98	1086		1		0	0	100		100	100	5.33141e-17		5.41217e-17	3.00121e-17					37.3		231.8		21.7	Peak Found	Not Found	High	Not Found	Peak Found	1
FALSE	High	Master Protein	Q8WVT3	Trafficking protein particle complex subunit 12 OS=Homo sapiens OX=9606 GN=TRAPPC12 PE=1 SV=3	0.009	2.435	2	1	1	1	735	79.3	4.91	250		1		0	0				100				3.00121e-17									900	Not Found	Not Found	Not Found	Not Found	High	1
FALSE	High	Master Protein	Q15269	Periodic tryptophan protein 2 homolog OS=Homo sapiens OX=9606 GN=PWP2 PE=2 SV=2	0.009	2.433	1	1	1	1	919	102.4	6.15	313		1		0	0		100		100		6.62708e-17		3.00121e-17						121			779	Not Found	Peak Found	Not Found	Not Found	High	1
FALSE	High	Master Protein	Q04118	Basic salivary proline-rich protein 3 OS=Homo sapiens OX=9606 GN=PRB3 PE=1 SV=2	0.008	2.429	7	1	1	1	309	31	10.8	157		1		0	0				100				3.00121e-17									147.4	Not Found	Not Found	Not Found	Not Found	Peak Found	1
FALSE	High	Master Protein	E7ETG3	Coiled-coil domain-containing protein 157 (Fragment) OS=Homo sapiens OX=9606 GN=CCDC157 PE=1 SV=1	0.008	2.421	3	1	1	1	201	22.2	6.09	340		1		0	0	1.061	0.945	1.204	0.854	0.999286	0.986398	0.987625	0.996927	0	0	0	0	103.7	92.4	117.7	97.8	83.5	Peak Found	Peak Found	Peak Found	High	Peak Found	1
FALSE	High	Master Protein	E9PL57	NEDD8 (Fragment) OS=Homo sapiens OX=9606 GN=NEDD8-MDP1 PE=3 SV=1	0.008	2.42	8	1	3	1	170	19.5	7.43	593		1		0	0	1.634	1.004	0.944	0.848	0.93774	0.986398	0.910422	0.971083	0	0	0	0	161.9	99.5	93.5	99.1	84.1	High	High	Peak Found	Peak Found	Peak Found	1
FALSE	High	Master Protein	Q92890-1	Isoform Long of Ubiquitin recognition factor in ER-associated degradation protein 1 OS=Homo sapiens OX=9606 GN=UFD1	0.008	2.419	2	1	1	1	343	38.7	6.34	547		1		0	0			100				5.41217e-17								642.6			Not Found	Not Found	High	Not Found	Not Found	1
FALSE	High	Master Protein	Q9H5V8	CUB domain-containing protein 1 OS=Homo sapiens OX=9606 GN=CDCP1 PE=1 SV=3	0.008	2.416	1	1	3	1	836	92.9	7.96	754		1		0	0	0.677	0.901	1.064	0.229	0.999286	0.963824	0.963611	0.843583	0	0	0	0	98.5	130.9	154.7	145.4	33.3	Peak Found	Peak Found	Peak Found	Peak Found	Peak Found	1
FALSE	High	Master Protein	Q13753	Laminin subunit gamma-2 OS=Homo sapiens OX=9606 GN=LAMC2 PE=1 SV=2	0.008	2.415	1	1	1	1	1193	130.9	6.19	372		1		0	0	12.745	4.384	4.68	52.349	0.0963707	0.00874512	0.00994303	0.214003	0	0	0	0	121.8	41.9	44.7	9.6	500.5	Peak Found	Peak Found	Peak Found	Peak Found	Peak Found	1
FALSE	High	Master Protein	O94925	Glutaminase kidney isoform, mitochondrial OS=Homo sapiens OX=9606 GN=GLS PE=1 SV=1	0.008	2.41	1	1	2	1	669	73.4	7.77	673		1		0	0	1.527	1.35	1.67	0.01	0.972405	0.901011	0.769862	3.00121e-17	0	0	0		127.3	112.5	139.2	83.4		High	High	Peak Found	Peak Found	Not Found	1
FALSE	High	Master Protein	Q9P003	Protein cornichon homolog 4 OS=Homo sapiens OX=9606 GN=CNIH4 PE=1 SV=1	0.008	2.406	14	1	2	1	139	16.1	6.65	315		1		0	0	0.01	0.01	0.01	0.186	5.33141e-17	6.62708e-17	5.41217e-17	0.752043				0				323.8	60.3	Not Found	Not Found	Not Found	High	Peak Found	1
FALSE	High	Master Protein	P02647	Apolipoprotein A-I OS=Homo sapiens OX=9606 GN=APOA1 PE=1 SV=1	0.008	2.401	5	1	1	1	267	30.8	5.76	269		1		0	0	0.01	0.01	0.01	0.01	5.33141e-17	6.62708e-17	5.41217e-17	3.00121e-17								839.8		Not Found	Not Found	Not Found	High	Not Found	1
FALSE	High	Master Protein	Q8N8A6	ATP-dependent RNA helicase DDX51 OS=Homo sapiens OX=9606 GN=DDX51 PE=1 SV=3	0.008	2.395	2	1	1	1	666	72.4	8.16	167		1		0	0	0.752	0.571	0.328	0.091	0.999286	0.452097	0.0103491	0.579979	0	0	0	0	115.4	87.5	50.3	153.4	13.9	Peak Found	Peak Found	Peak Found	Peak Found	Peak Found	1
FALSE	High	Master Protein	E9PC52	Histone-binding protein RBBP7 OS=Homo sapiens OX=9606 GN=RBBP7 PE=1 SV=1	0.008	2.394	2	1	1	1	416	46.9	5.07	295		1		0	0	0.588	0.698	0.938	0.338	0.977307	0.737044	0.898226	0.964825	0	0	0	0	80.9	96.1	129.1	137.7	46.5	Peak Found	Peak Found	Peak Found	Peak Found	Peak Found	1
FALSE	High	Master Protein	D6RBE9	Annexin OS=Homo sapiens OX=9606 GN=ANXA5 PE=1 SV=1	0.008	2.38	4	1	1	1	220	24.7	4.89	232		1		0	0	0.01	0.96	0.01	0.01	5.33141e-17	0.986398	5.41217e-17	3.00121e-17		0				264.4		275.5		Not Found	Peak Found	Not Found	High	Not Found	1
FALSE	High	Master Protein	Q12789	General transcription factor 3C polypeptide 1 OS=Homo sapiens OX=9606 GN=GTF3C1 PE=1 SV=4	0.008	2.371	0	1	2	1	2109	238.7	7.3	570		1		0	0	1.232	0.845	1.269	0.078	0.999286	0.9262	0.956009	0.571084	0	0	0	0	130.7	89.6	134.6	106.1	8.2	Peak Found	Peak Found	Peak Found	High	Peak Found	1
FALSE	High	Master Protein	E9PPJ0	Splicing factor 3B subunit 2 OS=Homo sapiens OX=9606 GN=SF3B2 PE=1 SV=1	0.008	2.369	1	1	1	1	878	98.1	5.62	457		1		0	0				100				3.00121e-17									900	Not Found	Not Found	Not Found	Not Found	High	1
FALSE	High	Master Protein	O00767	Acyl-CoA desaturase OS=Homo sapiens OX=9606 GN=SCD PE=1 SV=2	0.008	2.369	4	1	3	1	359	41.5	9	649		1		0	0	100	100	100	100	5.33141e-17	6.62708e-17	5.41217e-17	3.00121e-17					107.9	178.3	139.4		61.9	Peak Found	High	Peak Found	Not Found	Peak Found	1
FALSE	High	Master Protein	C9JRL6	Echinoderm microtubule-associated protein-like 2 OS=Homo sapiens OX=9606 GN=EML2 PE=1 SV=2	0.008	2.359	2	1	3	1	603	65.5	7.78	580		1		0	0	0.738	1.167	0.912	0.251	0.999286	0.986398	0.88221	0.865092	0	0	0	0	101.6	160.6	125.5	137.6	34.5	Peak Found	Peak Found	Peak Found	High	Peak Found	1
FALSE	High	Master Protein	Q9NZM1	Myoferlin OS=Homo sapiens OX=9606 GN=MYOF PE=1 SV=1	0.009	2.353	1	1	3	1	2061	234.6	6.18	623		1		0	0	0.01	0.834	2.062	0.01	5.33141e-17	0.911412	0.368599	3.00121e-17		0	0			131.4	324.8	157.5		Not Found	High	Peak Found	High	Not Found	1
FALSE	Medium	Master Protein	C9JHP4	Eukaryotic translation initiation factor 3 subunit L (Fragment) OS=Homo sapiens OX=9606 GN=EIF3L PE=1 SV=1	0.01	2.343	6	1	2	1	150	17.7	5.02	714		1		0	0	2.887	1.604	5.249	1.431	0.761294	0.729541	0.000239053	0.971836	0	0	0	0	104.8	58.2	190.6	36.3	52	Peak Found	Peak Found	High	Peak Found	Peak Found	1
FALSE	Medium	Master Protein	J3KP58	CAP-Gly domain-containing linker protein 1 OS=Homo sapiens OX=9606 GN=CLIP1 PE=1 SV=2	0.01	2.338	1	1	1	1	1316	148	5.31	406		1		0	0	0.146	1.102	0.885	0.01	0.287883	0.986398	0.81839	3.00121e-17	0	0	0		30.8	233.2	187.2	211.6		Peak Found	Peak Found	High	Peak Found	Not Found	1
FALSE	Medium	Master Protein	G5E9G4	Tetratricopeptide repeat domain 7A, isoform CRA_a OS=Homo sapiens OX=9606 GN=TTC7A PE=1 SV=1	0.01	2.336	2	1	1	1	824	92.7	6.62	193		1		0	0				100				3.00121e-17									900	Not Found	Not Found	Not Found	Not Found	High	1
FALSE	Medium	Master Protein	D6R9Z6	La-related protein 7 (Fragment) OS=Homo sapiens OX=9606 GN=LARP7 PE=1 SV=1	0.01	2.333	6	1	1	1	155	17.5	9.19	310		1		0	0	100	100	100	100	5.33141e-17	6.62708e-17	5.41217e-17	3.00121e-17					132.7	57.9	327		50.3	Peak Found	Peak Found	Peak Found	Not Found	Peak Found	1
FALSE	Medium	Master Protein	G3V5X4	Nesprin-2 OS=Homo sapiens OX=9606 GN=SYNE2 PE=1 SV=1	0.01	2.333	0	1	3	1	6818	787.2	5.45	1136		1		0	0	7.92	2.749	19.627	2.73	0.235157	0.125162	2.80558e-13	0.755603	0	0	0	0	156.8	54.4	388.5	19.8	54	High	Peak Found	Peak Found	Peak Found	High	1
FALSE	Medium	Master Protein	Q9HCY8	Protein S100-A14 OS=Homo sapiens OX=9606 GN=S100A14 PE=1 SV=1	0.01	2.33	7	1	1	1	104	11.7	5.24	443		1		0	0	0.653	1.09	1.122	0.01	0.999286	0.98875	0.998113	3.00121e-17	0	0	0		85.1	142	146.3	130.3		Peak Found	High	Peak Found	Peak Found	Not Found	1
FALSE	Medium	Master Protein	J3KS70	Band 4.1-like protein 3 (Fragment) OS=Homo sapiens OX=9606 GN=EPB41L3 PE=1 SV=8	0.01	2.325	12	1	13	1	90	9.8	4.55	2521		1		0	0	1.735	1.739	1.622	1.066	0.96449	0.605846	0.653887	0.982616	0	0	0	0	119.8	120	111.9	69	73.5	High	High	High	Peak Found	High	1
FALSE	Medium	Master Protein	E9PN10	Receptor-binding cancer antigen-expressed on SiSo cells (Fragment) OS=Homo sapiens OX=9606 GN=EBAG9 PE=1 SV=1	0.01	2.322	4	1	1	1	197	22.5	5.24	328		1		0	0	0.799	1.09	1.173	0.314	0.999286	0.98875	0.99817	0.941302	0	0	0	0	105	143.1	154.1	131.4	41.2	Peak Found	Peak Found	Peak Found	Peak Found	Peak Found	1
FALSE	Medium	Master Protein	Q8TB52	F-box only protein 30 OS=Homo sapiens OX=9606 GN=FBXO30 PE=1 SV=3	0.01	2.315	2	1	1	1	745	82.3	5.4	184		1		0	0				100				3.00121e-17									900	Not Found	Not Found	Not Found	Not Found	High	1
FALSE	Medium	Master Protein	P27540	Aryl hydrocarbon receptor nuclear translocator OS=Homo sapiens OX=9606 GN=ARNT PE=1 SV=1	0.01	2.314	2	1	1	1	789	86.6	6.54	204		1		0	0			100	100			5.41217e-17	3.00121e-17							469.4		430.6	Not Found	Not Found	Peak Found	Not Found	High	1
FALSE	Medium	Master Protein	Q76L83	Putative Polycomb group protein ASXL2 OS=Homo sapiens OX=9606 GN=ASXL2 PE=1 SV=1	0.01	2.314	0	1	1	1	1435	153.7	8.81	466		1		0	0	0.183	1.163	0.996	0.393	0.307632	0.986398	0.932017	0.980254	0	0	0	0	32.1	203.7	174.5	175.2	68.9	Peak Found	Peak Found	Peak Found	Peak Found	High	1
FALSE	Medium	Master Protein	Q99797	Mitochondrial intermediate peptidase OS=Homo sapiens OX=9606 GN=MIPEP PE=1 SV=2	0.01	2.312	1	1	1	1	713	80.6	7.05	406		1		0	0																		Not Found	Not Found	High	Not Found	Not Found	1
FALSE	Medium	Master Protein	Q9UIG0	Tyrosine-protein kinase BAZ1B OS=Homo sapiens OX=9606 GN=BAZ1B PE=1 SV=2	0.01	2.312	0	1	3	1	1483	170.8	8.48	1148		1		0	0	3.349	1.712	2.817	4.69	0.674648	0.627479	0.0503296	0.756959	0	0	0	0	164.8	84.2	138.6	49.2	230.8	Peak Found	High	Peak Found	High	Peak Found	1
FALSE	Medium	Master Protein	Q96JH7	Deubiquitinating protein VCIP135 OS=Homo sapiens OX=9606 GN=VCPIP1 PE=1 SV=2	0.01	2.311	1	1	14	1	1222	134.2	7.2	5118		1		0	0	0.67	2.871	2.157	0.36	0.999286	0.101827	0.226934	0.943723	0	0	0	0	56.7	243.1	182.6	84.7	30.4	High	High	High	High	High	1
FALSE	Medium	Master Protein	Q96HA7	Tonsoku-like protein OS=Homo sapiens OX=9606 GN=TONSL PE=1 SV=2	0.01	2.308	1	1	1	1	1378	150.8	6.42	328		1		0	0																		Not Found	Not Found	Not Found	Not Found	High	1
FALSE	Medium	Master Protein	Q96QD8	Sodium-coupled neutral amino acid transporter 2 OS=Homo sapiens OX=9606 GN=SLC38A2 PE=1 SV=2	0.01	2.306	2	1	6	1	506	56	8	1682		1		0	0	0.908	1.15	0.99	0.434	0.999286	0.986398	0.924338	0.982616	0	0	0	0	114.1	144.5	124.4	125.6	54.5	High	High	Peak Found	High	High	1
FALSE	Medium	Master Protein	P07099	Epoxide hydrolase 1 OS=Homo sapiens OX=9606 GN=EPHX1 PE=1 SV=1	0.01	2.302	2	1	1	1	455	52.9	7.25	486		1		0	0				100				3.00121e-17									900	Not Found	Not Found	Not Found	Not Found	High	1
FALSE	Medium	Master Protein	Q86X29	Lipolysis-stimulated lipoprotein receptor OS=Homo sapiens OX=9606 GN=LSR PE=1 SV=4	0.01	2.297	1	1	1	1	649	71.4	7.97	528		1		0	0	2.178	1.182	1.237	0.867	0.827214	0.985667	0.991887	0.971083	0	0	0	0	151.7	82.3	86.2	69.7	60.4	Peak Found	Peak Found	Peak Found	Peak Found	High	1
FALSE	Medium	Master Protein	A0A5F9ZHH3	Septin-4 OS=Homo sapiens OX=9606 GN=SEPTIN4 PE=1 SV=1	0.01	2.293	1	1	5	1	996	112.4	7.77	2225		1		0	0	1.201	1.305	1.526	0.77	0.999286	0.931574	0.75858	0.999163	0	0	0	0	96	104.4	122	80	61.6	High	High	Peak Found	High	Peak Found	1
FALSE	Medium	Master Protein	O95235	Kinesin-like protein KIF20A OS=Homo sapiens OX=9606 GN=KIF20A PE=1 SV=1	0.01	2.292	2	1	1	1	890	100.2	6.92	170		1		0	0				100				3.00121e-17									900	Not Found	Not Found	Not Found	Not Found	High	1
FALSE	Medium	Master Protein	Q14406	Chorionic somatomammotropin hormone-like 1 OS=Homo sapiens OX=9606 GN=CSHL1 PE=2 SV=2	0.011	2.287	4	1	6	1	222	25.4	5.91	2291		1		0	0	7.876	2.399	64.011	1.238	0.235157	0.226284	5.41217e-17	0.982616	0	0	0	0	55.3	16.9	449.9	7	8.7	High	High	High	High	Peak Found	1
FALSE	Medium	Master Protein	Q9BRP0	Transcription factor Ovo-like 2 OS=Homo sapiens OX=9606 GN=OVOL2 PE=1 SV=1	0.011	2.279	3	1	4	1	275	30.4	8.75	1305		1		0	0	1.508	1.341	2.226	0.173	0.985423	0.903266	0.194326	0.808581	0	0	0	0	120.8	107.4	178.3	80.1	13.8	Peak Found	Peak Found	High	Peak Found	Peak Found	1
FALSE	Medium	Master Protein	K7EQI9	Reticulophagy regulator 3 OS=Homo sapiens OX=9606 GN=RETREG3 PE=1 SV=1	0.011	2.277	2	1	1	1	369	40.8	4.89	483		1		0	0	1.018	1.107	1.311	0.496	0.999286	0.986398	0.932939	0.980254	0	0	0	0	110.5	120.2	142.3	108.5	53.8	Peak Found	Peak Found	Peak Found	Peak Found	Peak Found	1
FALSE	Medium	Master Protein	Q9H5Q4	Dimethyladenosine transferase 2, mitochondrial OS=Homo sapiens OX=9606 GN=TFB2M PE=1 SV=1	0.011	2.276	2	1	1	1	396	45.3	9.19	385		1		0	0	1.179	1.083	1.346	0.196	0.999286	0.993006	0.934671	0.827995	0	0	0	0	115.5	106.2	131.9	98	19.2	Peak Found	Peak Found	Peak Found	High	Peak Found	1
FALSE	Medium	Master Protein	Q9P2I0	Cleavage and polyadenylation specificity factor subunit 2 OS=Homo sapiens OX=9606 GN=CPSF2 PE=1 SV=2	0.011	2.273	2	1	1	1	782	88.4	5.11	228		1		0	0																		Not Found	Not Found	Not Found	Not Found	High	1
FALSE	Medium	Master Protein	O95714	E3 ubiquitin-protein ligase HERC2 OS=Homo sapiens OX=9606 GN=HERC2 PE=1 SV=2	0.011	2.268	0	1	1	1	4834	526.9	6.28	218		1		0	0	100				5.33141e-17								280.7					Peak Found	Not Found	Not Found	Not Found	Not Found	1
FALSE	Medium	Master Protein	P25786	Proteasome subunit alpha type-1 OS=Homo sapiens OX=9606 GN=PSMA1 PE=1 SV=1	0.011	2.256	3	1	1	1	263	29.5	6.61	341		1		0	0	0.214	0.418	0.457	0.197	0.304889	0.145149	0.143106	0.787013	0	0	0	0	40.4	78.8	86.2	188.6	37.2	Peak Found	Peak Found	Peak Found	High	Peak Found	1
FALSE	Medium	Master Protein	Q8NF50	Dedicator of cytokinesis protein 8 OS=Homo sapiens OX=9606 GN=DOCK8 PE=1 SV=3	0.013	2.241	0	1	4	1	2099	238.4	6.87	1584		1		0	0	0.815	1	1.296	0.473	0.999286	0.986398	0.972863	0.984872	0	0	0	0	86.5	106.1	137.6	106.2	50.2	Peak Found	High	Peak Found	High	Peak Found	1
FALSE	Medium	Master Protein	A0A2R8YCN4	Inositol polyphosphate 5-phosphatase OCRL (Fragment) OS=Homo sapiens OX=9606 GN=OCRL PE=1 SV=1	0.013	2.239	5	1	1	1	286	33.5	9.42	304		1		0	0				100				3.00121e-17									900	Not Found	Not Found	Not Found	Not Found	High	1
FALSE	Medium	Master Protein	P51854	Transketolase-like protein 1 OS=Homo sapiens OX=9606 GN=TKTL1 PE=1 SV=2	0.014	2.237	1	1	1	1	596	65.3	5.86	296		1		0	0	100		100	100	5.33141e-17		5.41217e-17	3.00121e-17					62.1		229.8		30.4	Peak Found	Not Found	High	Not Found	Peak Found	1
FALSE	Medium	Master Protein	F8WDS9	Glutathione S-transferase LANCL1 OS=Homo sapiens OX=9606 GN=LANCL1 PE=1 SV=1	0.014	2.233	15	1	1	1	82	9.3	9.99	229		1		0	0																		Not Found	High	Not Found	Not Found	Not Found	1
FALSE	Medium	Master Protein	O94806	Serine/threonine-protein kinase D3 OS=Homo sapiens OX=9606 GN=PRKD3 PE=1 SV=1	0.014	2.228	1	1	1	1	890	100.4	6.87	503		1		0	0				100				3.00121e-17									900	Not Found	Not Found	Not Found	Not Found	High	1
FALSE	Medium	Master Protein	K7EMI9	Coiled-coil domain-containing protein 106 OS=Homo sapiens OX=9606 GN=CCDC106 PE=1 SV=1	0.014	2.213	3	1	2	1	245	27.9	9.95	826		1		0	0	100	100	100	100	5.33141e-17	6.62708e-17	5.41217e-17	3.00121e-17					199.8	126.6	96.6		28	High	Peak Found	Peak Found	Not Found	Peak Found	1
FALSE	Medium	Master Protein	P21912	Succinate dehydrogenase [ubiquinone] iron-sulfur subunit, mitochondrial OS=Homo sapiens OX=9606 GN=SDHB PE=1 SV=3	0.014	2.21	3	1	1	1	280	31.6	8.76	371		1		0	0	4.398	1.677	2.487	0.01	0.355916	0.657584	0.307713	3.00121e-17	0	0	0		159.7	60.9	90.3	36.3		Peak Found	Peak Found	Peak Found	Peak Found	Not Found	1
FALSE	Medium	Master Protein	P12273	Prolactin-inducible protein OS=Homo sapiens OX=9606 GN=PIP PE=1 SV=1	0.014	2.206	5	1	3	1	146	16.6	8.05	893		1		0	0	0.452	0.254	0.478	0.138	0.909077	0.00889664	0.138926	0.723844	0	0	0	0	96.1	54.1	101.7	212.7	29.4	Peak Found	Peak Found	Peak Found	High	High	1
FALSE	Medium	Master Protein	Q9Y6M5	Zinc transporter 1 OS=Homo sapiens OX=9606 GN=SLC30A1 PE=1 SV=3	0.014	2.206	2	1	1	1	507	55.3	6.48	257		1		0	0	1.724	1.756	0.01	0.655	0.86618	0.594439	5.41217e-17	0.978392	0	0		0	147.1	149.8		85.3	55.9	Peak Found	Peak Found	Not Found	Peak Found	Peak Found	1
FALSE	Medium	Master Protein	P54136	Arginine--tRNA ligase, cytoplasmic OS=Homo sapiens OX=9606 GN=RARS1 PE=1 SV=2	0.014	2.2	1	1	2	1	660	75.3	6.68	556		1		0	0	0.364	0.748	1.134	0.227	0.745482	0.826764	0.987625	0.837436	0	0	0	0	58.3	119.8	181.7	160.1	36.4	High	Peak Found	Peak Found	Peak Found	Peak Found	1
FALSE	Medium	Master Protein	H7BXJ4	F-BAR domain only protein 2 OS=Homo sapiens OX=9606 GN=FCHO2 PE=1 SV=1	0.014	2.2	2	1	1	1	378	43.4	8.73	347		1		0	0				100				3.00121e-17									900	Not Found	Not Found	Not Found	Not Found	High	1
FALSE	Medium	Master Protein	H0YFD6	Enoyl-CoA hydratase OS=Homo sapiens OX=9606 GN=HADHA PE=1 SV=2	0.014	2.197	1	1	2	1	792	86.3	9.1	656		1		0	0	0.465	0.979	1.21	0.239	0.903614	0.986398	0.997039	0.864737	0	0	0	0	65.7	138.2	170.9	141.2	33.7	Peak Found	High	Peak Found	Peak Found	Peak Found	1
FALSE	Medium	Master Protein	B7Z6Z4	Myosin light polypeptide 6 OS=Homo sapiens OX=9606 GN=MYL6 PE=1 SV=1	0.014	2.196	5	1	1	1	238	26.7	5.08	199		1		0	0	0.01	0.09	0.01	0.01	5.33141e-17	6.77935e-07	5.41217e-17	3.00121e-17		0				69.8		775.2		Not Found	Peak Found	Not Found	High	Not Found	1
FALSE	Medium	Master Protein	Q9GZV1	Ankyrin repeat domain-containing protein 2 OS=Homo sapiens OX=9606 GN=ANKRD2 PE=1 SV=3	0.014	2.195	3	1	2	1	360	39.8	6.09	371		1		0	0	100	100	100	100	5.33141e-17	6.62708e-17	5.41217e-17	3.00121e-17					143.3	207.3	115.9		230.4	High	Peak Found	High	Not Found	Peak Found	1
FALSE	Medium	Master Protein	B9ZVN9	DNA-directed RNA polymerase subunit OS=Homo sapiens OX=9606 GN=POLR1A PE=1 SV=1	0.014	2.193	1	1	1	1	1659	187.7	7.39	192		1		0	0	0.459	0.762	1.018	0.01	0.887933	0.839095	0.949586	3.00121e-17	0	0	0		79.1	131.4	175.6	172.5		Peak Found	Peak Found	Peak Found	Peak Found	Not Found	1
FALSE	Medium	Master Protein	A0A087X0K9	Tight junction protein ZO-1 OS=Homo sapiens OX=9606 GN=TJP1 PE=1 SV=1	0.014	2.191	1	1	1	1	1676	187.7	6.7	255		1		0	0				100				3.00121e-17									900	Not Found	Not Found	Not Found	Not Found	High	1
FALSE	Medium	Master Protein	H0Y5N9	Collagen alpha-1(XII) chain (Fragment) OS=Homo sapiens OX=9606 GN=COL12A1 PE=1 SV=1	0.014	2.187	1	1	2	1	756	79.7	6.67	845		1		0	0	0.881	0.874	0.01	0.478	0.999286	0.948088	5.41217e-17	0.984872	0	0		0	146.1	145		165.9	79.3	High	Peak Found	Not Found	Peak Found	Peak Found	1
FALSE	Medium	Master Protein	F8VXW2	Actin-related protein 2/3 complex subunit 1B OS=Homo sapiens OX=9606 GN=ARPC1B PE=1 SV=2	0.014	2.185	6	1	1	1	130	15	8.6	334		1		0	0	100	100	100	100	5.33141e-17	6.62708e-17	5.41217e-17	3.00121e-17					109.6	205.8	118.8		64.4	Peak Found	High	Peak Found	Not Found	Peak Found	1
FALSE	Medium	Master Protein	Q08209	Serine/threonine-protein phosphatase 2B catalytic subunit alpha isoform OS=Homo sapiens OX=9606 GN=PPP3CA PE=1 SV=1	0.014	2.178	2	1	1	1	521	58.7	5.86	285		1		0	0	0.752	0.494	0.783	0.01	0.999286	0.286109	0.672476	3.00121e-17	0	0	0		130.4	85.7	135.8	173.5		Peak Found	Peak Found	Peak Found	Peak Found	Not Found	1
FALSE	Medium	Master Protein	Q9Y639	Neuroplastin OS=Homo sapiens OX=9606 GN=NPTN PE=1 SV=2	0.015	2.161	3	1	3	1	398	44.4	7.99	912		1		0	0	0.795	0.917	0.01	0.349	0.999286	0.97237	5.41217e-17	0.971083	0	0		0	203.2	234.3		255.5	89.3	High	High	Not Found	High	Peak Found	1
FALSE	Medium	Master Protein	O15020	Spectrin beta chain, non-erythrocytic 2 OS=Homo sapiens OX=9606 GN=SPTBN2 PE=1 SV=3	0.015	2.159	0	1	3	1	2390	271.2	6.11	982		1		0	0	0.568	0.848	0.738	0.01	0.977307	0.929178	0.560757	3.00121e-17	0	0	0		93.5	139.6	121.6	164.7		Peak Found	Peak Found	Peak Found	Peak Found	Not Found	1
FALSE	Medium	Master Protein	E5RGW4	Nucleophosmin (Fragment) OS=Homo sapiens OX=9606 GN=NPM1 PE=1 SV=1	0.015	2.152	22	1	1	1	59	6.9	4.48	224		1		0	0	0.296	0.672	0.443	0.622	0.643939	0.67786	0.0969598	0.999163	0	0	0	0	67.8	153.9	101.6	229	142.5	Peak Found	Peak Found	Peak Found	Peak Found	High	1
FALSE	Medium	Master Protein	O60701	UDP-glucose 6-dehydrogenase OS=Homo sapiens OX=9606 GN=UGDH PE=1 SV=1	0.015	2.145	3	1	1	1	494	55	7.12	273		1		0	0	0.69	0.664	0.01	0.864	0.999286	0.661534	5.41217e-17	0.910719	0	0		0	127.1	122.3		184.1	159	Peak Found	Peak Found	Not Found	Peak Found	Peak Found	1
FALSE	Medium	Master Protein	F6UYG0	Serine/threonine-protein kinase WNK1 OS=Homo sapiens OX=9606 GN=WNK1 PE=1 SV=1	0.015	2.145	2	1	1	1	393	42.4	9.14	410		1		0	0	100			100	5.33141e-17			3.00121e-17					143.1				225.3	Peak Found	Not Found	Not Found	Not Found	High	1
FALSE	Medium	Master Protein	H0YHX9	Nascent polypeptide-associated complex subunit alpha OS=Homo sapiens OX=9606 GN=NACA PE=1 SV=2	0.015	2.144	5	1	1	1	235	25.3	4.55	176		1		0	0	100	100			5.33141e-17	6.62708e-17							119.5	375.2				Peak Found	High	Not Found	Not Found	Not Found	1
FALSE	Medium	Master Protein	A0A0A0MTB8	WD repeat-containing protein 36 OS=Homo sapiens OX=9606 GN=WDR36 PE=1 SV=1	0.015	2.143	1	1	1	1	895	99.3	7.36	287		1		0	0	4.208	1.32	2.351	6.865	0.192257	0.923762	0.423896	0.152272	0	0	0	0	152.3	47.8	85.1	36.2	248.4	Peak Found	Peak Found	Peak Found	Peak Found	High	1
FALSE	Medium	Master Protein	Q9BZQ6	ER degradation-enhancing alpha-mannosidase-like protein 3 OS=Homo sapiens OX=9606 GN=EDEM3 PE=1 SV=2	0.015	2.143	1	1	1	1	932	104.6	4.93	148		1		0	0	100	100		100	5.33141e-17	6.62708e-17		3.00121e-17					216.8	91.2			47.9	Peak Found	Peak Found	Not Found	Not Found	Peak Found	1
FALSE	Medium	Master Protein	P49411	Elongation factor Tu, mitochondrial OS=Homo sapiens OX=9606 GN=TUFM PE=1 SV=2	0.017	2.138	3	1	1	1	452	49.5	7.61	91		1		0	0	0.01	0.63	0.01	0.747	5.33141e-17	0.58663	5.41217e-17	0.953092		0		0		138.7		220.1	164.4	Not Found	Peak Found	Not Found	Peak Found	High	1
FALSE	Medium	Master Protein	Q9BUI4	DNA-directed RNA polymerase III subunit RPC3 OS=Homo sapiens OX=9606 GN=POLR3C PE=1 SV=1	0.017	2.132	1	1	1	1	534	60.6	7.31	343		1		0	0	2.215	0.01	6.168	0.01	0.815809	6.62708e-17	0.000173493	3.00121e-17	0		0		141		392.6	63.6		Peak Found	Not Found	Peak Found	Peak Found	Not Found	1
FALSE	Medium	Master Protein	H3BSV8	Eukaryotic peptide chain release factor GTP-binding subunit ERF3A (Fragment) OS=Homo sapiens OX=9606 GN=GSPT1 PE=1 SV=1	0.017	2.13	5	1	3	1	199	22.2	4.79	1030		1		0	0	1.64	1.475	1.068	2.318	0.90325	0.826764	0.972863	0.735546	0	0	0	0	125.7	113	81.9	76.6	177.7	Peak Found	Peak Found	Peak Found	Peak Found	High	1
FALSE	Medium	Master Protein	A0A3B3IU51	Tight junction protein ZO-2 OS=Homo sapiens OX=9606 GN=TJP2 PE=1 SV=1	0.017	2.128	1	1	1	1	1047	118.3	7.56	361		1		0	0				100				3.00121e-17									900	Not Found	Not Found	Not Found	Not Found	High	1
FALSE	Medium	Master Protein	K7ERQ8	PCAF_N domain-containing protein (Fragment) OS=Homo sapiens OX=9606 PE=4 SV=1	0.017	2.128	4	1	1	1	282	31.4	7.42	315		1		0	0	100	100	100	100	5.33141e-17	6.62708e-17	5.41217e-17	3.00121e-17					106.1	10.3	224.7		61.1	Peak Found	Peak Found	High	Not Found	Peak Found	1
FALSE	Medium	Master Protein	P16402	Histone H1.3 OS=Homo sapiens OX=9606 GN=H1-3 PE=1 SV=2	0.017	2.125	5	1	1	1	221	22.3	11.02	299		1		0	0	0.744	1.471	1.154	0.01	0.999286	0.827067	0.998113	3.00121e-17	0	0	0		103.4	204.4	160.4	139		Peak Found	High	Peak Found	Peak Found	Not Found	1
FALSE	Medium	Master Protein	K7EM28	Serine/threonine-protein phosphatase 6 regulatory subunit 1 (Fragment) OS=Homo sapiens OX=9606 GN=PPP6R1 PE=1 SV=8	0.017	2.122	6	1	1	1	157	18	4.89	305		1		0	0				100				3.00121e-17									900	Not Found	Not Found	Not Found	Not Found	High	1
FALSE	Medium	Master Protein	Q9NUQ3	Gamma-taxilin OS=Homo sapiens OX=9606 GN=TXLNG PE=1 SV=2	0.017	2.119	2	1	6	1	528	60.5	7.52	2219		1		0	0	0.412	1.228	0.7	0.202	0.90325	0.966518	0.435646	0.836662	0	0	0	0	67.8	202	115.2	164.6	33.3	Peak Found	High	High	High	Peak Found	1
FALSE	Medium	Master Protein	J3KT75	Mannose-P-dolichol utilization defect 1 protein (Fragment) OS=Homo sapiens OX=9606 GN=MPDU1 PE=1 SV=1	0.017	2.108	6	1	2	1	154	16.5	8.18	381		1		0	0	0.616	0.639	0.609	0.275	0.984715	0.605846	0.407697	0.899228	0	0	0	0	103.2	107	102.1	167.6	46.1	Peak Found	Peak Found	Peak Found	High	Peak Found	1
FALSE	Medium	Master Protein	P07737	Profilin-1 OS=Homo sapiens OX=9606 GN=PFN1 PE=1 SV=2	0.017	2.104	6	1	1	1	140	15	8.27	290		1		0	0	0.01	1.236	0.88	0.01	5.33141e-17	0.961118	0.827984	3.00121e-17		0	0			264	187.9	213.6		Not Found	High	Peak Found	Peak Found	Not Found	1
FALSE	Medium	Master Protein	Q5T5C0	Syntaxin-binding protein 5 OS=Homo sapiens OX=9606 GN=STXBP5 PE=1 SV=1	0.017	2.096	1	1	1	1	1151	127.5	7.28	174		1		0	0	100	100		100	5.33141e-17	6.62708e-17		3.00121e-17					251.1	120.4			225.4	Peak Found	Peak Found	Not Found	Not Found	High	1
FALSE	Medium	Master Protein	Q5VZK9	F-actin-uncapping protein LRRC16A OS=Homo sapiens OX=9606 GN=CARMIL1 PE=1 SV=1	0.02	2.087	1	1	6	1	1371	151.5	7.85	756		1		0	0	1.158	1.237	1.603	0.478	0.999286	0.95974	0.822583	0.991692	0	0	0	0	111.5	119.2	154.3	96.3	46	High	High	High	Peak Found	Peak Found	1
FALSE	Medium	Master Protein	Q8NG50	RAD52 motif-containing protein 1 OS=Homo sapiens OX=9606 GN=RDM1 PE=1 SV=1	0.02	2.082	2	1	1	1	284	31.9	6.05	476		1		0	0	100	100	100	100	5.33141e-17	6.62708e-17	5.41217e-17	3.00121e-17					126.1	89.5	142.6		168.5	Peak Found	Peak Found	Peak Found	Not Found	High	1
FALSE	Medium	Master Protein	A0A2R8YDT1	Glutamine synthetase OS=Homo sapiens OX=9606 GN=GLUL PE=1 SV=1	0.021	2.076	4	1	1	1	507	57.1	8.37	134		1		0	0	0.01	0.01	0.01	0.01	5.33141e-17	6.62708e-17	5.41217e-17	3.00121e-17								900		Not Found	Not Found	Not Found	High	Not Found	1
FALSE	Medium	Master Protein	P09960	Leukotriene A-4 hydrolase OS=Homo sapiens OX=9606 GN=LTA4H PE=1 SV=2	0.021	2.065	2	1	2	1	611	69.2	6.18	293		1		0	0	0.601	0.906	1.19	0.01	0.977769	0.966518	0.99817	3.00121e-17	0	0	0		85.3	128.5	168.8	141.9		High	Peak Found	High	Peak Found	Not Found	1
FALSE	Medium	Master Protein	G3V114	Docking protein 2 OS=Homo sapiens OX=9606 GN=DOK2 PE=1 SV=1	0.021	2.064	5	1	3	1	123	13.6	8.78	1533		1		0	0	3.364	2.86	0.01	71.926	0.530085	0.103886	5.41217e-17	0.161922	0	0		0	36.7	31.2		10.9	784.8	High	High	Not Found	Peak Found	High	1
FALSE	Medium	Master Protein	C9JQJ4	Septin-2 (Fragment) OS=Homo sapiens OX=9606 GN=SEPTIN2 PE=1 SV=1	0.021	2.063	8	1	1	1	147	16.6	5.15	286		1		0	0		100		100		6.62708e-17		3.00121e-17						181.2			435.6	Not Found	Peak Found	Not Found	Not Found	High	1
FALSE	Medium	Master Protein	E7EVC7	Autophagy-related protein 16-1 OS=Homo sapiens OX=9606 GN=ATG16L1 PE=1 SV=1	0.021	2.063	1	1	1	1	624	70	6.62	407		1		0	0	1.124	1.325	1.739	0.693	0.999286	0.917405	0.705186	0.982616	0	0	0	0	93.8	110.5	145	83.4	57.8	Peak Found	High	Peak Found	Peak Found	Peak Found	1
FALSE	Medium	Master Protein	P57764	Gasdermin-D OS=Homo sapiens OX=9606 GN=GSDMD PE=1 SV=1	0.021	2.063	1	1	1	1	484	52.8	5.08	456		1		0	0	1.974	2.734	1.646	10.969	0.827595	0.128337	0.828901	0.561597	0	0	0	0	84.9	117.6	70.8	43	471.6	Peak Found	Peak Found	Peak Found	Peak Found	High	1
FALSE	Medium	Master Protein	H0Y586	Proteasome endopeptidase complex (Fragment) OS=Homo sapiens OX=9606 GN=PSMA7 PE=1 SV=1	0.021	2.057	7	1	1	1	187	21.2	8.87	234		1		0	0	0.235	1.086	1.04	0.01	0.504995	0.991659	0.953173	3.00121e-17	0	0	0		45.8	211.5	202.5	194.7		Peak Found	High	Peak Found	Peak Found	Not Found	1
FALSE	Medium	Master Protein	C9J9C1	Serine/threonine-protein phosphatase 2A 65 kDa regulatory subunit A alpha isoform (Fragment) OS=Homo sapiens OX=9606 GN=PPP2R1A PE=1 SV=2	0.021	2.05	3	1	1	1	395	43.2	5.38	169		1		0	0	0.01	0.01	0.01	0.01	5.33141e-17	6.62708e-17	5.41217e-17	3.00121e-17								900		Not Found	Not Found	Not Found	High	Not Found	1
FALSE	Medium	Master Protein	B4DKV7	Epidermal growth factor receptor kinase substrate 8-like protein 1 OS=Homo sapiens OX=9606 GN=EPS8L1 PE=1 SV=1	0.02	2.049	1	1	1	1	659	73.3	5.97	270		1		0	0	0.835	0.91	0.988	0.278	0.999286	0.966518	0.92938	0.906797	0	0	0	0	107.2	116.8	126.8	128.3	35.7	Peak Found	Peak Found	Peak Found	High	Peak Found	1
FALSE	Medium	Master Protein	O00186	Syntaxin-binding protein 3 OS=Homo sapiens OX=9606 GN=STXBP3 PE=1 SV=2	0.021	2.046	1	1	1	1	592	67.7	7.8	359		1		0	0		100				6.62708e-17								199.5				Not Found	Peak Found	Not Found	Not Found	Not Found	1
FALSE	Medium	Master Protein	P46063	ATP-dependent DNA helicase Q1 OS=Homo sapiens OX=9606 GN=RECQL PE=1 SV=3	0.021	2.045	2	1	1	1	649	73.4	7.88	176		1		0	0	0.61	0.898	1.365	0.271	0.985423	0.95974	0.954599	0.901304	0	0	0	0	83.2	122.3	185.9	136.2	36.9	Peak Found	Peak Found	Peak Found	Peak Found	Peak Found	1
FALSE	Medium	Master Protein	E9PMM2	Nucleolar transcription factor 1 (Fragment) OS=Homo sapiens OX=9606 GN=UBTF PE=1 SV=1	0.021	2.041	7	1	1	1	149	17.8	8.21	291		1		0	0				100				3.00121e-17									900	Not Found	Not Found	Not Found	Not Found	High	1
FALSE	Medium	Master Protein	Q14244	Ensconsin OS=Homo sapiens OX=9606 GN=MAP7 PE=1 SV=1	0.021	2.031	1	1	1	1	749	84	9.61	444		1		0	0				100				3.00121e-17									900	Not Found	Not Found	Not Found	Not Found	High	1
FALSE	Medium	Master Protein	O60678	Protein arginine N-methyltransferase 3 OS=Homo sapiens OX=9606 GN=PRMT3 PE=1 SV=4	0.021	2.028	2	1	1	1	531	59.9	5.35	474		1		0	0	4.539	2.485	27.456	0.01	0.316753	0.196212	5.41217e-17	3.00121e-17	0	0	0		62.5	34.2	378.1	13.8		Peak Found	Peak Found	High	Peak Found	Not Found	1
FALSE	Medium	Master Protein	Q504Q3	PAN2-PAN3 deadenylation complex catalytic subunit PAN2 OS=Homo sapiens OX=9606 GN=PAN2 PE=1 SV=3	0.021	2.025	1	1	1	1	1202	135.3	5.99	384		1		0	0	3.518	4.333	3.318	2.032	0.474515	0.00923338	0.093832	0.747392	0	0	0	0	124.3	153	117.2	35.3	71.8	Peak Found	High	Peak Found	Peak Found	Peak Found	1
FALSE	Medium	Master Protein	Q5JSP0	FYVE, RhoGEF and PH domain-containing protein 3 OS=Homo sapiens OX=9606 GN=FGD3 PE=1 SV=1	0.021	2.021	1	1	3	1	725	79.4	6.15	1370		1		0	0	18.013	3	70.445	6.025	0.0475672	0.0823597	5.41217e-17	0.708195	0	0	0	0	102.9	17.1	402.2	5.7	34.4	High	Peak Found	High	Peak Found	Peak Found	1
FALSE	Medium	Master Protein	P35914	Hydroxymethylglutaryl-CoA lyase, mitochondrial OS=Homo sapiens OX=9606 GN=HMGCL PE=1 SV=2	0.021	2.021	2	1	1	1	325	34.3	8.54	454		1		0	0	1.753	1.789	2.243	0.935	0.962576	0.56612	0.187615	0.988414	0	0	0	0	115.5	117.9	147.8	65.9	61.6	Peak Found	Peak Found	Peak Found	Peak Found	Peak Found	1
FALSE	Medium	Master Protein	H7C1A7	N-acylglucosamine 2-epimerase (Fragment) OS=Homo sapiens OX=9606 GN=RENBP PE=1 SV=1	0.021	2.015	5	1	4	1	159	17.7	8.18	1306		1		0	0	100	100	100	100	5.33141e-17	6.62708e-17	5.41217e-17	3.00121e-17					140.7	5.5	357.6		54	High	Peak Found	High	Not Found	Peak Found	1
FALSE	Medium	Master Protein	Q5VTJ3	Kelch domain-containing protein 7A OS=Homo sapiens OX=9606 GN=KLHDC7A PE=1 SV=5	0.021	2.006	3	1	7	1	777	84.4	7.69	384		1		0	0	8.52	0.196	4.821	0.377	0.209315	0.0013698	0.00129956	0.980254	0	0	0	0	238.7	5.5	135.1	28	10.6	High	Peak Found	High	Peak Found	Peak Found	1
FALSE	Medium	Master Protein	P00390	Glutathione reductase, mitochondrial OS=Homo sapiens OX=9606 GN=GSR PE=1 SV=2	0.021	1.999	2	1	1	1	522	56.2	8.5	424		1		0	0	0.707	1.41	1.666	0.622	0.999286	0.862357	0.606521	0.999163	0	0	0	0	65.8	131.2	155.1	93.1	57.9	Peak Found	Peak Found	Peak Found	Peak Found	Peak Found	1
FALSE	Medium	Master Protein	Q6ZT12	E3 ubiquitin-protein ligase UBR3 OS=Homo sapiens OX=9606 GN=UBR3 PE=2 SV=2	0.021	1.996	0	1	1	1	1888	212.3	6.1	369		1		0	0				100				3.00121e-17									900	Not Found	Not Found	Not Found	Not Found	High	1
FALSE	Medium	Master Protein	P12110	Collagen alpha-2(VI) chain OS=Homo sapiens OX=9606 GN=COL6A2 PE=1 SV=4	0.021	1.994	1	1	2	1	1019	108.5	6.21	675		1		0	0	16.714	3.37	91.019	4.61	0.0565037	0.0440889	5.41217e-17	0.735546	0	0	0	0	85.1	17.1	463.2	5.1	23.5	Peak Found	Peak Found	High	Peak Found	Peak Found	1
FALSE	Medium	Master Protein	P42126	Enoyl-CoA delta isomerase 1, mitochondrial OS=Homo sapiens OX=9606 GN=ECI1 PE=1 SV=1	0.021	1.993	4	1	2	1	302	32.8	8.54	683		1		0	0	100	100	100	100	5.33141e-17	6.62708e-17	5.41217e-17	3.00121e-17					99.8	18.2	362.3		104.7	Peak Found	Peak Found	High	Not Found	High	1
FALSE	Medium	Master Protein	Q9H2P0	Activity-dependent neuroprotector homeobox protein OS=Homo sapiens OX=9606 GN=ADNP PE=1 SV=1	0.021	1.992	1	1	1	1	1102	123.5	7.34	242		1		0	0				100				3.00121e-17									900	Not Found	Not Found	Not Found	Not Found	High	1
FALSE	Medium	Master Protein	Q9Y4W2	Ribosomal biogenesis protein LAS1L OS=Homo sapiens OX=9606 GN=LAS1L PE=1 SV=2	0.021	1.99	2	1	1	1	734	83	4.73	176		1		0	0				100				3.00121e-17									900	Not Found	Not Found	Not Found	Not Found	High	1
FALSE	Medium	Master Protein	P05186	Alkaline phosphatase, tissue-nonspecific isozyme OS=Homo sapiens OX=9606 GN=ALPL PE=1 SV=4	0.021	1.98	2	1	1	1	524	57.3	6.67	365		1		0	0	2.73	0.01	0.01	1.042	0.658443	6.62708e-17	5.41217e-17	0.876168	0			0	184			67.4	70.2	Peak Found	Not Found	Not Found	Peak Found	Peak Found	1
FALSE	Medium	Master Protein	Q494V2	Cilia- and flagella-associated protein 100 OS=Homo sapiens OX=9606 GN=CFAP100 PE=1 SV=1	0.024	1.965	1	1	3	1	611	71.1	7.11	1398		1		0	0	2.37	1.497	1.848	4.064	0.841686	0.826364	0.584795	0.794075	0	0	0	0	140.4	88.7	109.5	59.2	240.7	High	Peak Found	Peak Found	Peak Found	High	1
FALSE	Medium	Master Protein	Q6STE5	SWI/SNF-related matrix-associated actin-dependent regulator of chromatin subfamily D member 3 OS=Homo sapiens OX=9606 GN=SMARCD3 PE=1 SV=1	0.024	1.963	4	1	1	1	483	55	9.35	93		1		0	0	0.801	0.01	0.01	0.01	0.999286	6.62708e-17	5.41217e-17	3.00121e-17	0				163.4			203.9		High	Not Found	Not Found	Peak Found	Not Found	1
FALSE	Medium	Master Protein	P48047	ATP synthase subunit O, mitochondrial OS=Homo sapiens OX=9606 GN=ATP5PO PE=1 SV=1	0.023	1.962	4	1	2	1	213	23.3	9.96	744		1		0	0	0.317	0.567	0.562	0.01	0.791458	0.444641	0.160524	3.00121e-17	0	0	0		57.5	102.9	102	181.5		Peak Found	High	Peak Found	Peak Found	Not Found	1
FALSE	Medium	Master Protein	O15321	Transmembrane 9 superfamily member 1 OS=Homo sapiens OX=9606 GN=TM9SF1 PE=2 SV=2	0.023	1.955	1	1	2	1	606	68.8	7.17	570		1		0	0	0.302	0.478	1.099	0.077	0.697242	0.257138	0.983403	0.5474	0	0	0	0	57.3	90.7	208.7	189.8	14.5	Peak Found	Peak Found	Peak Found	High	Peak Found	1
FALSE	Medium	Master Protein	F8VV59	Nucleosome assembly protein 1-like 1 OS=Homo sapiens OX=9606 GN=NAP1L1 PE=1 SV=1	0.023	1.955	3	1	1	1	327	38	4.68	202		1		0	0	0.602	0.572	0.831	0.183	0.977307	0.453904	0.803124	0.745538	0	0	0	0	84.2	80	116.2	139.8	25.5	Peak Found	Peak Found	Peak Found	Peak Found	Peak Found	1
FALSE	Medium	Master Protein	A0A2R8Y7G1	Aryl hydrocarbon receptor OS=Homo sapiens OX=9606 GN=AHR PE=1 SV=1	0.023	1.954	2	1	1	1	833	94.4	6.14	167		1		0	0				100				3.00121e-17									900	Not Found	Not Found	Not Found	Not Found	High	1
FALSE	Medium	Master Protein	Q96QG7	Myotubularin-related protein 9 OS=Homo sapiens OX=9606 GN=MTMR9 PE=1 SV=1	0.023	1.954	1	1	3	1	549	63.4	6.39	1282		1		0	0	100	100	100		5.33141e-17	6.62708e-17	5.41217e-17						146.5	96.1	52.3			Peak Found	High	Peak Found	Not Found	Not Found	1
FALSE	Medium	Master Protein	Q7Z2Y5	Nik-related protein kinase OS=Homo sapiens OX=9606 GN=NRK PE=1 SV=2	0.024	1.935	0	1	4	1	1582	178.4	6.33	1421		1		0	0	0.55	1.165	1.027	0.404	0.977307	0.986398	0.941345	0.980254	0	0	0	0	72.8	154.2	135.9	132.3	53.5	Peak Found	High	Peak Found	High	Peak Found	1
FALSE	Medium	Master Protein	Q6NUM9	All-trans-retinol 13,14-reductase OS=Homo sapiens OX=9606 GN=RETSAT PE=1 SV=2	0.024	1.934	2	1	2	1	610	66.8	8.28	791		1		0	0	0.893	1.156	0.44	0.362	0.999286	0.986398	0.0694665	0.965268	0	0	0	0	127	164.6	62.7	142.3	51.5	Peak Found	High	Peak Found	High	Peak Found	1
FALSE	Medium	Master Protein	Q96P16	Regulation of nuclear pre-mRNA domain-containing protein 1A OS=Homo sapiens OX=9606 GN=RPRD1A PE=1 SV=1	0.024	1.933	2	1	1	1	312	35.7	7.55	371		1		0	0	3.353	2.785	14.483	0.01	0.327474	0.117529	4.34596e-07	3.00121e-17	0	0	0		98.9	82.2	427.3	29.5		Peak Found	Peak Found	High	Peak Found	Not Found	1
FALSE	Medium	Master Protein	F5GY88	Mediator complex subunit 24 OS=Homo sapiens OX=9606 GN=MED24 PE=1 SV=2	0.024	1.932	1	1	1	1	1008	112.1	7.03	219		1		0	0	0.832	0.928	1.178	1.032	0.999286	0.981015	0.99817	0.851468	0	0	0	0	105.6	117.8	149.5	127	131.1	Peak Found	Peak Found	Peak Found	Peak Found	High	1
FALSE	Medium	Master Protein	A6NGQ3	Obscurin OS=Homo sapiens OX=9606 GN=OBSCN PE=1 SV=5	0.024	1.931	0	1	3	1	8923	972.4	5.99	998		1		0	0	100		100		5.33141e-17		5.41217e-17						11.1		349.3			Peak Found	Not Found	High	Not Found	Not Found	1
FALSE	Medium	Master Protein	B0QY70	Transcription factor MafF (Fragment) OS=Homo sapiens OX=9606 GN=MAFF PE=1 SV=8	0.024	1.919	6	1	1	1	125	14.2	9.99	390		1		0	0	2.178	1.182	1.237	0.867	0.827214	0.985667	0.991887	0.971083	0	0	0	0	151.7	82.3	86.2	69.7	60.4	Peak Found	Peak Found	Peak Found	Peak Found	Peak Found	1
FALSE	Medium	Master Protein	A0A5F9ZHG7	Rap guanine nucleotide exchange factor 6 OS=Homo sapiens OX=9606 GN=RAPGEF6 PE=4 SV=1	0.024	1.916	1	1	3	1	1267	141.8	7.28	1040		1		0	0	1.139	0.865	1.056	0.106	0.999286	0.939361	0.963133	0.593491	0	0	0	0	120	91.2	111.3	105.4	11.2	Peak Found	High	High	Peak Found	Peak Found	1
FALSE	Medium	Master Protein	B5TY33	Mitogen-activated protein kinase OS=Homo sapiens OX=9606 GN=MAPK14 PE=1 SV=1	0.024	1.91	5	1	1	1	173	19.9	8.66	187		1		0	0	0.81	0.996	1.337	0.422	0.999286	0.986398	0.926814	0.967545	0	0	0	0	92.2	113.5	152.4	113.9	48	Peak Found	Peak Found	Peak Found	Peak Found	Peak Found	1
FALSE	Medium	Master Protein	Q8N201	Integrator complex subunit 1 OS=Homo sapiens OX=9606 GN=INTS1 PE=1 SV=2	0.024	1.904	0	1	3	1	2190	244.1	6.13	1030		1		0	0	0.465	1.391	0.94	0.277	0.925224	0.873487	0.871511	0.913451	0	0	0	0	71.1	212.9	143.9	153	42.4	Peak Found	Peak Found	Peak Found	Peak Found	Peak Found	1
FALSE	Medium	Master Protein	C9IZ80	Basic leucine zipper and W2 domain-containing protein 1 (Fragment) OS=Homo sapiens OX=9606 GN=BZW1 PE=1 SV=1	0.024	1.903	3	1	2	1	294	33.4	7.85	652		1		0	0	0.373	0.528	0.565	0.01	0.827214	0.358991	0.250346	3.00121e-17	0	0	0		62.2	88.2	94.3	166.9		Peak Found	High	Peak Found	High	Not Found	1
FALSE	Medium	Master Protein	H0Y4R1	Inosine-5'-monophosphate dehydrogenase 2 (Fragment) OS=Homo sapiens OX=9606 GN=IMPDH2 PE=1 SV=1	0.025	1.897	2	1	1	1	470	51	8.18	234		1		0	0	0.593	0.589	0.841	0.01	0.977307	0.48968	0.803124	3.00121e-17	0	0	0		94.6	93.9	134.1	159.5		Peak Found	Peak Found	Peak Found	High	Not Found	1
FALSE	Medium	Master Protein	O60566	Mitotic checkpoint serine/threonine-protein kinase BUB1 beta OS=Homo sapiens OX=9606 GN=BUB1B PE=1 SV=3	0.025	1.896	2	1	1	1	1050	119.5	5.27	84		1		0	0				100				3.00121e-17									900	Not Found	Not Found	Not Found	Not Found	High	1
FALSE	Medium	Master Protein	B1AKN6	Nuclear factor 1 OS=Homo sapiens OX=9606 GN=NFIA PE=1 SV=1	0.025	1.89	3	1	1	1	380	42.3	9.44	283		1		0	0	0.01	0.755	0.01	0.01	5.33141e-17	0.826764	5.41217e-17	3.00121e-17		0				250.9		332.5		Not Found	Peak Found	Not Found	Peak Found	Not Found	1
FALSE	Medium	Master Protein	P08590	Myosin light chain 3 OS=Homo sapiens OX=9606 GN=MYL3 PE=1 SV=3	0.025	1.889	7	1	1	1	195	21.9	5.1	95		1		0	0	0.49	0.01	0.01	1.075	0.898723	6.62708e-17	5.41217e-17	0.915968	0			0	38.3			78	83.9	Peak Found	Not Found	Not Found	Peak Found	Peak Found	1
FALSE	Medium	Master Protein	H7C4R5	FAST kinase domain-containing protein 4 (Fragment) OS=Homo sapiens OX=9606 GN=TBRG4 PE=1 SV=1	0.026	1.878	3	1	3	1	274	29.6	5.4	1091		1		0	0	0.617	1.293	1.571	0.128	0.988291	0.939361	0.707456	0.72677	0	0	0	0	72.1	151.1	183.5	116.8	15	High	Peak Found	Peak Found	Peak Found	Peak Found	1
FALSE	Medium	Master Protein	P13796	Plastin-2 OS=Homo sapiens OX=9606 GN=LCP1 PE=1 SV=6	0.026	1.876	1	1	4	1	627	70.2	5.43	750		1		0	0	0.6	1.014	1.241	0.221	0.977307	0.986651	0.987625	0.811674	0	0	0	0	76.9	130	159.2	128.3	28.3	Peak Found	High	High	Peak Found	Peak Found	1
FALSE	Medium	Master Protein	B5MDE0	Protein RFT1 homolog OS=Homo sapiens OX=9606 GN=RFT1 PE=1 SV=1	0.026	1.875	2	1	3	1	502	55.8	8.72	832		1		0	0	10.447	2.915	51.993	1.22	0.144358	0.0944397	5.41217e-17	0.982616	0	0	0	0	81.6	22.8	405.9	7.8	9.5	High	Peak Found	Peak Found	Peak Found	Peak Found	1
FALSE	Medium	Master Protein	Q8N108	Mesoderm induction early response protein 1 OS=Homo sapiens OX=9606 GN=MIER1 PE=1 SV=2	0.026	1.873	4	1	1	1	512	57.9	4.42	11		1		0	0	0.01	0.103	0.279	0.058	5.33141e-17	3.11234e-06	0.00107909	0.480099		0	0	0		14.1	38.3	137	8	Not Found	Peak Found	Peak Found	Peak Found	Peak Found	1
FALSE	Medium	Master Protein	Q14693	Phosphatidate phosphatase LPIN1 OS=Homo sapiens OX=9606 GN=LPIN1 PE=1 SV=2	0.026	1.868	1	1	1	1	890	98.6	6.58	367		1		0	0				100				3.00121e-17									631.4	Not Found	Not Found	Not Found	Not Found	Peak Found	1
FALSE	Medium	Master Protein	Q08257	Quinone oxidoreductase OS=Homo sapiens OX=9606 GN=CRYZ PE=1 SV=1	0.026	1.868	2	1	2	1	329	35.2	8.44	826		1		0	0	0.69	0.936	0.799	0.056	0.999286	0.984536	0.650892	0.536308	0	0	0	0	96.3	130.6	111.5	139.6	7.8	Peak Found	Peak Found	Peak Found	Peak Found	Peak Found	1
FALSE	Medium	Master Protein	H0Y9Y3	Synaptopodin-2 (Fragment) OS=Homo sapiens OX=9606 GN=SYNPO2 PE=1 SV=1	0.026	1.864	1	1	3	1	1155	125.3	8.56	945		1		0	0	100	16.505	100	100	5.33141e-17	1.97727e-08	5.41217e-17	3.00121e-17	0	0	0	0	137.4	18.6	218.5	1.1	202.4	High	High	High	Peak Found	Peak Found	1
FALSE	Medium	Master Protein	P48556	26S proteasome non-ATPase regulatory subunit 8 OS=Homo sapiens OX=9606 GN=PSMD8 PE=1 SV=2	0.026	1.862	2	1	2	1	350	39.6	9.7	824		1		0	0	1.235	1.099	0.349	0.537	0.985423	0.986398	0.0490058	0.988414	0	0	0	0	138.3	123.1	39	112	60.2	Peak Found	High	Peak Found	High	Peak Found	1
FALSE	Medium	Master Protein	Q06323	Proteasome activator complex subunit 1 OS=Homo sapiens OX=9606 GN=PSME1 PE=1 SV=1	0.026	1.859	5	1	1	1	249	28.7	6.02	128		1		0	0	4.019	2.657	3.908	2.531	0.484732	0.14587	0.0273453	0.772984	0	0	0	0	142	93.9	138.1	35.3	89.4	Peak Found	Peak Found	Peak Found	Peak Found	High	1
FALSE	Medium	Master Protein	P01024	Complement C3 OS=Homo sapiens OX=9606 GN=C3 PE=1 SV=2	0.026	1.859	1	1	1	1	1663	187	6.4	85		1		0	0	0.01	0.01	0.01	0.01	5.33141e-17	6.62708e-17	5.41217e-17	3.00121e-17								900		Not Found	Not Found	Not Found	High	Not Found	1
FALSE	Medium	Master Protein	Q9Y333	U6 snRNA-associated Sm-like protein LSm2 OS=Homo sapiens OX=9606 GN=LSM2 PE=1 SV=1	0.026	1.858	20	1	1	1	95	10.8	6.52	23		1		0	0	100			100	5.33141e-17			3.00121e-17					127.7				393.8	Peak Found	Not Found	Not Found	Not Found	High	1
FALSE	Medium	Master Protein	Q6WKZ4	Rab11 family-interacting protein 1 OS=Homo sapiens OX=9606 GN=RAB11FIP1 PE=1 SV=3	0.026	1.858	1	1	2	1	1283	137.1	5.43	320		1		0	0	0.01	0.336	0.23	0.01	5.33141e-17	0.0487235	0.000216768	3.00121e-17		0	0			105.1	72.1	313.2		Not Found	Peak Found	Peak Found	Peak Found	Not Found	1
FALSE	Medium	Master Protein	E7EN44	Lon protease homolog 2, peroxisomal OS=Homo sapiens OX=9606 GN=LONP2 PE=1 SV=1	0.026	1.856	3	1	1	1	605	68	6.96	37		1		0	0				100				3.00121e-17									900	Not Found	Not Found	Not Found	Not Found	High	1
FALSE	Medium	Master Protein	P42694	Probable helicase with zinc finger domain OS=Homo sapiens OX=9606 GN=HELZ PE=1 SV=2	0.026	1.851	0	1	2	1	1942	218.8	7.42	776		1		0	0	0.219	0.781	0.982	0.01	0.475686	0.862357	0.918448	3.00121e-17	0	0	0		43.3	154.8	194.5	198.2		Peak Found	Peak Found	High	High	Not Found	1
FALSE	Medium	Master Protein	Q86UV5	Ubiquitin carboxyl-terminal hydrolase 48 OS=Homo sapiens OX=9606 GN=USP48 PE=1 SV=1	0.026	1.847	1	1	1	1	1035	119	6.05	261		1		0	0																		Not Found	Not Found	Not Found	Not Found	Not Found	1
FALSE	Medium	Master Protein	O60488	Long-chain-fatty-acid--CoA ligase 4 OS=Homo sapiens OX=9606 GN=ACSL4 PE=1 SV=2	0.026	1.847	1	1	1	1	711	79.1	8.38	276		1		0	0	0.861	0.871	0.767	0.495	0.999286	0.94499	0.700251	0.999163	0	0	0	0	114.6	116	102.1	133.1	65.9	High	Peak Found	Peak Found	Peak Found	Peak Found	1
FALSE	Medium	Master Protein	O60271	C-Jun-amino-terminal kinase-interacting protein 4 OS=Homo sapiens OX=9606 GN=SPAG9 PE=1 SV=4	0.027	1.831	1	1	1	1	1321	146.1	5.15	197		1		0	0				100				3.00121e-17									900	Not Found	Not Found	Not Found	Not Found	High	1
FALSE	Medium	Master Protein	A0A5K1VW56	ATPase family AAA domain-containing protein 3B OS=Homo sapiens OX=9606 GN=ATAD3B PE=1 SV=1	0.027	1.83	7	1	1	1	298	32.5	9.95	9		1		0	0	1.512	0.01	1.052	0.689	0.956623	6.62708e-17	0.963611	0.971083	0		0	0	156.2		108.7	103.3	71.2	Peak Found	Not Found	Peak Found	Peak Found	Peak Found	1
FALSE	Medium	Master Protein	P51153	Ras-related protein Rab-13 OS=Homo sapiens OX=9606 GN=RAB13 PE=1 SV=1	0.027	1.824	3	1	2	1	203	22.8	9.19	596		1		0	0	4.18	1.395	19.438	0.01	0.3528	0.873487	6.95479e-12	3.00121e-17	0	0	0		93.3	31.1	433.7	22.3		Peak Found	Peak Found	High	Peak Found	Not Found	1
FALSE	Medium	Master Protein	J3KS36	pre-rRNA 2'-O-ribose RNA methyltransferase FTSJ3 (Fragment) OS=Homo sapiens OX=9606 GN=FTSJ3 PE=1 SV=1	0.027	1.824	4	1	1	1	151	16.9	10.21	315		1		0	0	14.683	7.755	6.32	61.07	0.0516996	9.24643e-05	0.00198399	0.188265	0	0	0	0	109.1	57.6	47	7.4	453.8	Peak Found	High	Peak Found	Peak Found	Peak Found	1
FALSE	Medium	Master Protein	Q96HC4	PDZ and LIM domain protein 5 OS=Homo sapiens OX=9606 GN=PDLIM5 PE=1 SV=5	0.027	1.819	2	1	1	1	596	63.9	8.21	257		1		0	0																		Not Found	Not Found	High	Not Found	Not Found	1
FALSE	Medium	Master Protein	A0A087WUP6	Transmembrane and coiled-coil domain-containing protein 3 (Fragment) OS=Homo sapiens OX=9606 GN=TMCO3 PE=1 SV=1	0.028	1.812	5	1	2	1	145	16.9	4.97	557		1		0	0	0.614	0.33	1.012	0.079	0.988291	0.0439791	0.949586	0.580633	0	0	0	0	106.6	57.2	175.7	173.5	13.8	High	High	Peak Found	Peak Found	Peak Found	1
FALSE	Medium	Master Protein	F8VRE9	Coronin (Fragment) OS=Homo sapiens OX=9606 GN=CORO1C PE=1 SV=1	0.029	1.801	6	1	2	1	163	17.9	7.42	415		1		0	0	1.034	1.403	1.157	0.644	0.999286	0.867699	0.998113	0.982616	0	0	0	0	110.2	149.5	123.4	106.6	68.6	Peak Found	High	Peak Found	Peak Found	Peak Found	1
FALSE	Medium	Master Protein	E7EQB2	Lactotransferrin (Fragment) OS=Homo sapiens OX=9606 GN=LTF PE=1 SV=1	0.031	1.799	1	1	1	1	696	76.6	8.02	280		1		0	0	0.573	0.793	0.883	0.251	0.977307	0.867699	0.826263	0.869244	0	0	0	0	84.4	116.8	130	147.3	37	Peak Found	Peak Found	Peak Found	Peak Found	Peak Found	1
FALSE	Medium	Master Protein	E9PQD7	40S ribosomal protein S2 OS=Homo sapiens OX=9606 GN=RPS2 PE=1 SV=1	0.032	1.795	3	1	2	1	235	25.2	10.24	635		1		0	0	100				5.33141e-17								472.4					High	Not Found	Not Found	Not Found	Not Found	1
FALSE	Medium	Master Protein	P10644	cAMP-dependent protein kinase type I-alpha regulatory subunit OS=Homo sapiens OX=9606 GN=PRKAR1A PE=1 SV=1	0.032	1.789	2	1	1	1	381	43	5.35	522		1		0	0	0.873	1.262	1.323	0.478	0.999286	0.950576	0.929571	0.982616	0	0	0	0	93.8	135.6	142.3	107.5	51.4	Peak Found	Peak Found	High	Peak Found	Peak Found	1
FALSE	Medium	Master Protein	C9JF17	Apolipoprotein D (Fragment) OS=Homo sapiens OX=9606 GN=APOD PE=1 SV=1	0.032	1.784	3	1	1	1	215	24.1	5.6	340		1		0	0		100	100			6.62708e-17	5.41217e-17							233.1	156			Not Found	High	Peak Found	Not Found	Not Found	1
FALSE	Medium	Master Protein	P08559	Pyruvate dehydrogenase E1 component subunit alpha, somatic form, mitochondrial OS=Homo sapiens OX=9606 GN=PDHA1 PE=1 SV=3	0.032	1.783	2	1	1	1	390	43.3	8.06	366		1		0	0	1.144	1.344	1.765	1.026	0.999286	0.901011	0.522405	0.984872	0	0	0	0	99.4	116.7	153.3	86.9	89.1	Peak Found	Peak Found	Peak Found	Peak Found	Peak Found	1
FALSE	Medium	Master Protein	C9J5X1	Tyrosine-protein kinase receptor OS=Homo sapiens OX=9606 GN=IGF1R PE=1 SV=1	0.032	1.782	1	1	1	1	1366	154.7	5.83	263		1		0	0				100				3.00121e-17									900	Not Found	Not Found	Not Found	Not Found	High	1
FALSE	Medium	Master Protein	A0A2R8YCZ4	Lambda-crystallin homolog OS=Homo sapiens OX=9606 GN=CRYL1 PE=1 SV=1	0.032	1.782	9	1	2	1	252	27.5	5.59	152		1		0	0	0.376	0.284	0.085	0.5	0.872556	0.017957	3.59539e-11	0.982018	0	0	0	0	70.9	53.6	16.1	188.6	94.4	Peak Found	Peak Found	Peak Found	Peak Found	Peak Found	1
FALSE	Medium	Master Protein	Q6ZN66	Guanylate-binding protein 6 OS=Homo sapiens OX=9606 GN=GBP6 PE=2 SV=1	0.032	1.781	1	1	1	1	633	72.4	6.37	189		1		0	0	0.01	0.181	0.306	0.165	5.33141e-17	0.00071622	0.00426526	0.787443		0	0	0		50.8	85.7	280.6	46.4	Not Found	Peak Found	Peak Found	Peak Found	Peak Found	1
FALSE	Medium	Master Protein	Q9P2M7	Cingulin OS=Homo sapiens OX=9606 GN=CGN PE=1 SV=2	0.032	1.78	1	1	2	1	1197	136.3	5.54	398		1		0	0	100	100	100	100	5.33141e-17	6.62708e-17	5.41217e-17	3.00121e-17					128.1	79.2	72.2		219.8	High	Peak Found	Peak Found	Not Found	Peak Found	1
FALSE	Medium	Master Protein	O43823	A-kinase anchor protein 8 OS=Homo sapiens OX=9606 GN=AKAP8 PE=1 SV=1	0.032	1.776	1	1	1	1	692	76.1	5.15	259		1		0	0	5.278	3.815	3.614	0.694	0.390962	0.0209543	0.0305449	0.982616	0	0	0	0	158.7	114.7	108.6	30.1	20.9	Peak Found	Peak Found	Peak Found	Peak Found	High	1
FALSE	Medium	Master Protein	Q9BW60	Elongation of very long chain fatty acids protein 1 OS=Homo sapiens OX=9606 GN=ELOVL1 PE=1 SV=1	0.032	1.776	4	1	1	1	279	32.6	9.6	226		1		0	0	1.156	0.963	1.778	1.206	0.999286	0.986398	0.753366	0.801017	0	0	0	0	144.1	120.1	221.7	124.7	150.3	Peak Found	Peak Found	Peak Found	Peak Found	Peak Found	1
FALSE	Medium	Master Protein	Q13257	Mitotic spindle assembly checkpoint protein MAD2A OS=Homo sapiens OX=9606 GN=MAD2L1 PE=1 SV=1	0.032	1.771	4	1	1	1	205	23.5	5.08	299		1		0	0	4.029	1.038	3.484	3.481	0.346814	0.997378	0.0890072	0.610259	0	0	0	0	178.3	45.9	154.2	44.3	154.1	Peak Found	Peak Found	Peak Found	Peak Found	Peak Found	1
FALSE	Medium	Master Protein	Q13325	Interferon-induced protein with tetratricopeptide repeats 5 OS=Homo sapiens OX=9606 GN=IFIT5 PE=1 SV=1	0.032	1.77	2	1	1	1	482	55.8	7.4	355		1		0	0			100				5.41217e-17								377.1			Not Found	Not Found	High	Not Found	Not Found	1
FALSE	Medium	Master Protein	Q9NPH3	Interleukin-1 receptor accessory protein OS=Homo sapiens OX=9606 GN=IL1RAP PE=1 SV=2	0.032	1.769	1	1	1	1	570	65.4	8.12	299		1		0	0	0.841	0.301	0.714	0.098	0.999286	0.0256215	0.526511	0.580408	0	0	0	0	156.4	56	132.8	185.9	18.2	Peak Found	Peak Found	Peak Found	High	Peak Found	1
FALSE	Medium	Master Protein	Q7Z2Z2	Elongation factor-like GTPase 1 OS=Homo sapiens OX=9606 GN=EFL1 PE=1 SV=2	0.032	1.769	1	1	1	1	1120	125.4	5.91	283		1		0	0	0.976	1.163	0.01	0.861	0.999286	0.986398	5.41217e-17	0.941302	0	0		0	130.1	155		133.3	114.8	Peak Found	Peak Found	Not Found	Peak Found	Peak Found	1
FALSE	Medium	Master Protein	D6RG13	40S ribosomal protein S3a (Fragment) OS=Homo sapiens OX=9606 GN=RPS3A PE=1 SV=1	0.033	1.767	9	1	1	1	223	25.6	9.66	46		1		0	0	100			100	5.33141e-17			3.00121e-17					312.2				164.8	Peak Found	Not Found	Not Found	Not Found	Peak Found	1
FALSE	Medium	Master Protein	P52732	Kinesin-like protein KIF11 OS=Homo sapiens OX=9606 GN=KIF11 PE=1 SV=2	0.033	1.765	1	1	2	1	1056	119.1	5.64	595		1		0	0	0.01	1.007	5.253	0.01	5.33141e-17	0.986398	0.00101648	3.00121e-17		0	0			89.6	467.5	89		Not Found	High	Peak Found	High	Not Found	1
FALSE	Medium	Master Protein	P04080	Cystatin-B OS=Homo sapiens OX=9606 GN=CSTB PE=1 SV=2	0.033	1.758	6	1	1	1	98	11.1	7.56	358		1		0	0	0.01	0.274	0.01	0.01	5.33141e-17	0.014066	5.41217e-17	3.00121e-17		0				175.7		642.4		Not Found	Peak Found	Not Found	High	Not Found	1
FALSE	Medium	Master Protein	Q8TC07	TBC1 domain family member 15 OS=Homo sapiens OX=9606 GN=TBC1D15 PE=1 SV=2	0.033	1.757	2	1	1	1	691	79.4	5.67	296		1		0	0																		Not Found	Not Found	Not Found	Not Found	High	1
FALSE	Medium	Master Protein	K7ERU7	Telomerase RNA component-interacting RNase OS=Homo sapiens OX=9606 GN=TRIR PE=1 SV=1	0.032	1.755	18	1	1	1	133	13.4	6.81	130		1		0	0		100				6.62708e-17								356.7				Not Found	Peak Found	Not Found	Not Found	Not Found	1
FALSE	Medium	Master Protein	O95260	Arginyl-tRNA--protein transferase 1 OS=Homo sapiens OX=9606 GN=ATE1 PE=1 SV=2	0.032	1.754	3	1	2	1	518	59.1	7.93	95		1		0	0	0.224	0.057	0.06	0.147	0.503054	1.89705e-09	1.47736e-12	0.745538	0	0	0	0	71.3	18	19.2	318.3	46.8	High	Peak Found	Peak Found	Peak Found	Peak Found	1
FALSE	Medium	Master Protein	P31146	Coronin-1A OS=Homo sapiens OX=9606 GN=CORO1A PE=1 SV=4	0.033	1.752	2	1	1	1	461	51	6.68	122		1		0	0	100	100	100	100	5.33141e-17	6.62708e-17	5.41217e-17	3.00121e-17					92.4	23.2	348.3		22.5	High	Peak Found	Peak Found	Not Found	Peak Found	1
FALSE	Medium	Master Protein	B4E1E0	CTP synthase OS=Homo sapiens OX=9606 GN=CTPS1 PE=1 SV=1	0.033	1.752	2	1	1	1	435	49.7	7.52	215		1		0	0	1.003	0.933	2.287	0.499	0.999286	0.984381	0.384702	0.999163	0	0	0	0	96.3	89.6	219.5	96	47.9	Peak Found	Peak Found	Peak Found	Peak Found	Peak Found	1
FALSE	Medium	Master Protein	B7ZKJ8	ITIH4 protein OS=Homo sapiens OX=9606 GN=ITIH4 PE=1 SV=1	0.033	1.751	2	1	1	1	935	103.8	6.89	5		1		0	0																		Not Found	Not Found	Not Found	Not Found	Not Found	1
FALSE	Medium	Master Protein	P20618	Proteasome subunit beta type-1 OS=Homo sapiens OX=9606 GN=PSMB1 PE=1 SV=2	0.033	1.75	6	1	1	1	241	26.5	8.13	159		1		0	0	0.01	0.346	0.01	0.01	5.33141e-17	0.0577202	5.41217e-17	3.00121e-17		0				155.1		448.3		Not Found	Peak Found	Not Found	High	Not Found	1
FALSE	Medium	Master Protein	Q5VXN0	Ribosome production factor 2 homolog (Fragment) OS=Homo sapiens OX=9606 GN=RPF2 PE=1 SV=1	0.033	1.749	4	1	1	1	214	24.6	9.55	197		1		0	0	14.316	3.197	7.01	3.286	0.0778684	0.0589901	8.87033e-06	0.808871	0	0	0	0	278.9	62.3	136.6	19.5	64	Peak Found	Peak Found	Peak Found	Peak Found	Peak Found	1
FALSE	Medium	Master Protein	Q9HA64	Ketosamine-3-kinase OS=Homo sapiens OX=9606 GN=FN3KRP PE=1 SV=2	0.033	1.749	6	1	5	1	309	34.4	7.33	210		1		0	0	0.401	0.639	0.194	0.115	0.872556	0.605846	2.75873e-05	0.70556	0	0	0	0	82	130.5	39.5	204.3	23.6	High	High	Peak Found	Peak Found	Peak Found	1
FALSE	Medium	Master Protein	O14646	Chromodomain-helicase-DNA-binding protein 1 OS=Homo sapiens OX=9606 GN=CHD1 PE=1 SV=2	0.033	1.747	0	1	1	1	1710	196.6	7.14	236		1		0	0	2.246	1.014	2.108	0.01	0.62484	0.986651	0.550461	3.00121e-17	0	0	0		131.5	59.4	123.4	58.6		Peak Found	Peak Found	Peak Found	Peak Found	Not Found	1
FALSE	Medium	Master Protein	Q9UBQ7	Glyoxylate reductase/hydroxypyruvate reductase OS=Homo sapiens OX=9606 GN=GRHPR PE=1 SV=1	0.033	1.746	3	1	1	1	328	35.6	7.39	263		1		0	0	100			100	5.33141e-17			3.00121e-17					206.7				398.6	Peak Found	Not Found	Not Found	Not Found	Peak Found	1
FALSE	Medium	Master Protein	Q9H0X9	Oxysterol-binding protein-related protein 5 OS=Homo sapiens OX=9606 GN=OSBPL5 PE=1 SV=1	0.033	1.741	1	1	1	1	879	98.6	7.47	185		1		0	0	0.01	0.01	0.01	0.486	5.33141e-17	6.62708e-17	5.41217e-17	0.999163				0				367.5	178.7	Not Found	Not Found	Not Found	Peak Found	High	1
FALSE	Medium	Master Protein	F5GY05	Constitutive coactivator of peroxisome proliferator-activated receptor gamma OS=Homo sapiens OX=9606 GN=FAM120B PE=1 SV=1	0.033	1.739	1	1	2	1	933	106	5.87	399		1		0	0				100				3.00121e-17									900	Not Found	Not Found	Not Found	Not Found	High	1
FALSE	Medium	Master Protein	Q969M3	Protein YIPF5 OS=Homo sapiens OX=9606 GN=YIPF5 PE=1 SV=1	0.033	1.736	4	1	1	1	257	28	4.36	226		1		0	0	1.031	1.05	0.902	0.567	0.999286	0.999106	0.88221	0.984481	0	0	0	0	112.3	114.3	98.2	108.9	61.7	Peak Found	Peak Found	Peak Found	Peak Found	Peak Found	1
FALSE	Medium	Master Protein	P34810	Macrosialin OS=Homo sapiens OX=9606 GN=CD68 PE=1 SV=2	0.033	1.735	6	1	1	1	354	37.4	8.87	39		1		0	0	0.516	0.144	0.399	0.172	0.962576	9.39453e-05	0.0565956	0.767616	0	0	0	0	110.7	30.8	85.5	214.3	36.9	Peak Found	Peak Found	Peak Found	High	Peak Found	1
FALSE	Medium	Master Protein	Q9Y450	HBS1-like protein OS=Homo sapiens OX=9606 GN=HBS1L PE=1 SV=1	0.033	1.731	2	1	1	1	684	75.4	6.61	251		1		0	0	0.609	1.17	0.01	0.54	0.985423	0.986398	5.41217e-17	0.999163	0	0		0	88	169		144.5	78	Peak Found	High	Not Found	Peak Found	Peak Found	1
FALSE	Medium	Master Protein	A0A075B7B1	Desmuslin, isoform CRA_a OS=Homo sapiens OX=9606 GN=SYNM PE=1 SV=1	0.033	1.731	1	1	4	1	1253	140.1	5.07	981		1		0	0	0.17	0.187	0.172	0.049	0.420414	0.000941735	2.7728e-06	0.538034	0	0	0	0	49.7	54.8	50.3	292.4	14.4	Peak Found	High	Peak Found	High	High	1
FALSE	Medium	Master Protein	Q9BXW6	Oxysterol-binding protein-related protein 1 OS=Homo sapiens OX=9606 GN=OSBPL1A PE=1 SV=2	0.033	1.73	1	1	1	1	950	108.4	6.38	464		1		0	0	100	100	100	100	5.33141e-17	6.62708e-17	5.41217e-17	3.00121e-17					175.2	75.4	50.1		147.6	Peak Found	Peak Found	Peak Found	Not Found	High	1
FALSE	Medium	Master Protein	C9JKF1	Sterile alpha motif domain-containing protein 9 (Fragment) OS=Homo sapiens OX=9606 GN=SAMD9 PE=1 SV=1	0.033	1.727	1	1	1	1	1283	148.7	7.14	54		1		0	0																		Not Found	Not Found	Not Found	Not Found	High	1
FALSE	Medium	Master Protein	Q96G03	Phosphoglucomutase-2 OS=Homo sapiens OX=9606 GN=PGM2 PE=1 SV=4	0.033	1.727	1	1	2	1	612	68.2	6.73	445		1		0	0	0.01	0.01	0.01	0.674	5.33141e-17	6.62708e-17	5.41217e-17	0.975567				0				275.3	185.5	Not Found	Not Found	Not Found	High	Peak Found	1
FALSE	Medium	Master Protein	P21397	Amine oxidase [flavin-containing] A OS=Homo sapiens OX=9606 GN=MAOA PE=1 SV=1	0.034	1.725	1	1	1	1	527	59.6	7.85	310		1		0	0	2.338	1.797	23.77	4.858	0.596949	0.554823	4.75301e-10	0.241384	0	0	0	0	48.3	37.2	491.5	20.7	100.5	Peak Found	Peak Found	High	Peak Found	Peak Found	1
FALSE	Medium	Master Protein	J3KTL8	Structural maintenance of chromosomes flexible hinge domain-containing protein 1 (Fragment) OS=Homo sapiens OX=9606 GN=SMCHD1 PE=1 SV=1	0.034	1.721	1	1	1	1	1388	155.5	8.02	157		1		0	0	0.619	0.853	0.858	0.01	0.985423	0.932346	0.815856	3.00121e-17	0	0	0		91.5	126	126.9	147.8		Peak Found	High	Peak Found	Peak Found	Not Found	1
FALSE	Medium	Master Protein	P62820	Ras-related protein Rab-1A OS=Homo sapiens OX=9606 GN=RAB1A PE=1 SV=3	0.034	1.719	4	1	1	1	205	22.7	6.21	317		1		0	0			100				5.41217e-17								223.3			Not Found	Not Found	Peak Found	Not Found	Not Found	1
FALSE	Medium	Master Protein	Q5VT25	Serine/threonine-protein kinase MRCK alpha OS=Homo sapiens OX=9606 GN=CDC42BPA PE=1 SV=1	0.034	1.717	1	1	3	1	1732	197.2	6.58	753		1		0	0	0.265	0.01	0.01	0.01	0.533303	6.62708e-17	5.41217e-17	3.00121e-17	0				139.9			527.3		Peak Found	Not Found	Not Found	Peak Found	Not Found	1
FALSE	Medium	Master Protein	Q9UMZ2	Synergin gamma OS=Homo sapiens OX=9606 GN=SYNRG PE=1 SV=2	0.034	1.715	1	1	1	1	1314	140.6	5.03	178		1		0	0	100	100	100	100	5.33141e-17	6.62708e-17	5.41217e-17	3.00121e-17					150.2	75.1	35.7		253.2	Peak Found	High	Peak Found	Not Found	Peak Found	1
FALSE	Medium	Master Protein	P78537	Biogenesis of lysosome-related organelles complex 1 subunit 1 OS=Homo sapiens OX=9606 GN=BLOC1S1 PE=1 SV=2	0.034	1.712	5	1	1	1	153	17.3	9.33	238		1		0	0	0.393	1.294	1.451	0.208	0.832631	0.93852	0.830945	0.823339	0	0	0	0	53.9	177.4	199	137.1	28.5	Peak Found	Peak Found	Peak Found	High	Peak Found	1
FALSE	Medium	Master Protein	P61073	C-X-C chemokine receptor type 4 OS=Homo sapiens OX=9606 GN=CXCR4 PE=1 SV=1	0.034	1.709	3	1	1	1	352	39.7	8.21	187		1		0	0	1.952	1.606	0.01	0.01	0.80428	0.728449	5.41217e-17	3.00121e-17	0	0			174.1	143.2		89.2		Peak Found	Peak Found	Not Found	Peak Found	Not Found	1
FALSE	Medium	Master Protein	A6NFF4	Kv channel-interacting protein 2 OS=Homo sapiens OX=9606 GN=KCNIP2 PE=1 SV=1	0.034	1.706	4	1	1	1	184	21.5	4.65	423		1		0	0	0.653	1.005	0.496	0.38	0.988291	0.986398	0.0885642	0.967482	0	0	0	0	98.9	152.3	75.1	151.5	57.5	Peak Found	Peak Found	Peak Found	Peak Found	Peak Found	1
FALSE	Medium	Master Protein	P10155	60 kDa SS-A/Ro ribonucleoprotein OS=Homo sapiens OX=9606 GN=RO60 PE=1 SV=2	0.035	1.702	1	1	1	1	538	60.6	8.03	322		1		0	0	0.41	1.11	0.99	0.309	0.900144	0.986398	0.932939	0.923033	0	0	0	0	66.6	180.4	160.9	162.5	50.2	Peak Found	Peak Found	Peak Found	Peak Found	Peak Found	1
FALSE	Medium	Master Protein	A0A0U1RRH9	Septin-7 (Fragment) OS=Homo sapiens OX=9606 GN=SEPTIN7 PE=1 SV=1	0.035	1.698	6	1	1	1	147	16.5	6.32	190		1		0	0	0.894	0.748	0.661	0.812	0.999286	0.826764	0.526511	0.941302	0	0	0	0	105.7	88.4	78.1	118.2	95.9	Peak Found	Peak Found	Peak Found	Peak Found	Peak Found	1
FALSE	Medium	Master Protein	P23526	Adenosylhomocysteinase OS=Homo sapiens OX=9606 GN=AHCY PE=1 SV=4	0.036	1.678	3	1	2	1	432	47.7	6.34	388		1		0	0	0.01	0.01	1.43	0.01	5.33141e-17	6.62708e-17	0.918448	3.00121e-17			0				300.2	210		Not Found	Not Found	High	High	Not Found	1
FALSE	Medium	Master Protein	P40227	T-complex protein 1 subunit zeta OS=Homo sapiens OX=9606 GN=CCT6A PE=1 SV=3	0.036	1.678	2	1	6	1	531	58	6.68	675		1		0	0	0.569	0.623	0.88	0.225	0.977307	0.570406	0.822285	0.83676	0	0	0	0	87.3	95.7	135.1	153.6	34.6	High	Peak Found	Peak Found	High	High	1
FALSE	Medium	Master Protein	P07942	Laminin subunit beta-1 OS=Homo sapiens OX=9606 GN=LAMB1 PE=1 SV=2	0.038	1.675	0	1	1	1	1786	197.9	4.94	247		1		0	0	0.639	0.917	1.09	0.01	0.985423	0.972472	0.982514	3.00121e-17	0	0	0		95.2	136.7	162.4	149		Peak Found	Peak Found	Peak Found	Peak Found	Not Found	1
FALSE	Medium	Master Protein	M0R0P8	Unconventional myosin-IXb OS=Homo sapiens OX=9606 GN=MYO9B PE=1 SV=1	0.038	1.672	1	1	1	1	2157	243.2	8.78	179		1		0	0				100				3.00121e-17									900	Not Found	Not Found	Not Found	Not Found	High	1
FALSE	Medium	Master Protein	Q8WZA9	Immunity-related GTPase family Q protein OS=Homo sapiens OX=9606 GN=IRGQ PE=1 SV=1	0.038	1.671	2	1	1	1	623	62.7	4.88	151		1		0	0	100	100	100	100	5.33141e-17	6.62708e-17	5.41217e-17	3.00121e-17					181.7	71.9	77.9		144.9	Peak Found	Peak Found	Peak Found	Not Found	Peak Found	1
FALSE	Medium	Master Protein	F6U1T9	Calcineurin subunit B type 1 OS=Homo sapiens OX=9606 GN=PPP3R1 PE=1 SV=1	0.039	1.668	4	1	1	1	160	18.2	4.92	308		1		0	0	100		100		5.33141e-17		5.41217e-17						129.6		116.9			Peak Found	Not Found	Peak Found	Not Found	Not Found	1
FALSE	Medium	Master Protein	C9JJX6	Armadillo repeat protein deleted in velo-cardio-facial syndrome OS=Homo sapiens OX=9606 GN=ARVCF PE=1 SV=1	0.039	1.665	1	1	1	1	893	96.8	7.05	246		1		0	0	0.042	0.264	0.047	0.031	0.0328623	0.011126	5.41217e-17	0.419253	0	0	0	0	21.4	133.5	23.6	506	15.8	Peak Found	Peak Found	Peak Found	Peak Found	Peak Found	1
FALSE	Medium	Master Protein	K7EJE1	Complex I-B16.6 OS=Homo sapiens OX=9606 GN=NDUFA13 PE=3 SV=1	0.039	1.663	6	1	1	1	150	17.1	10.3	258		1		0	0	0.882	0.549	0.774	0.472	0.999286	0.404306	0.6034	0.978392	0	0	0	0	120.7	75.1	105.9	136.8	64.6	Peak Found	Peak Found	Peak Found	Peak Found	Peak Found	1
FALSE	Medium	Master Protein	G3V1D1	Ferritin OS=Homo sapiens OX=9606 GN=FTH1 PE=1 SV=1	0.039	1.661	9	1	1	1	113	12.9	5.3	229		1		0	0																		Not Found	Not Found	Not Found	Not Found	Not Found	1
FALSE	Medium	Master Protein	E9PHN7	Glutathione S-transferase Mu 2 OS=Homo sapiens OX=9606 GN=GSTM2 PE=1 SV=2	0.04	1.657	4	1	2	1	181	21.3	8.32	729		1		0	0	0.348	0.94	1.235	0.048	0.827214	0.985667	0.972863	0.404493	0	0	0	0	59	159.4	209.3	169.4	8.2	Peak Found	Peak Found	High	Peak Found	Peak Found	1
FALSE	Medium	Master Protein	E7ET76	Glutathione hydrolase 1 proenzyme (Fragment) OS=Homo sapiens OX=9606 GN=GGT1 PE=1 SV=1	0.039	1.656	2	1	1	1	463	50	6.73	295		1		0	0	100	100	100	100	5.33141e-17	6.62708e-17	5.41217e-17	3.00121e-17					229.1	153.3	160.1		309	Peak Found	Peak Found	Peak Found	Not Found	High	1
FALSE	Medium	Master Protein	Q99584	Protein S100-A13 OS=Homo sapiens OX=9606 GN=S100A13 PE=1 SV=1	0.039	1.656	11	1	1	1	98	11.5	6.16	169		1		0	0			100				5.41217e-17								401			Not Found	Not Found	Peak Found	Not Found	Not Found	1
FALSE	Medium	Master Protein	H0Y7Z9	Protein-tyrosine-phosphatase (Fragment) OS=Homo sapiens OX=9606 GN=PTPRF PE=1 SV=1	0.04	1.655	0	1	1	1	1332	150.4	6.62	338		1		0	0	3.001	2.095	2.371	0.193	0.719088	0.36213	0.193009	0.808581	0	0	0	0	137.6	96.1	108.7	45.9	8.8	Peak Found	Peak Found	Peak Found	Peak Found	Peak Found	1
FALSE	Medium	Master Protein	E9PCA1	T-complex protein 1 subunit epsilon OS=Homo sapiens OX=9606 GN=CCT5 PE=1 SV=1	0.04	1.65	2	1	1	1	520	57.1	5.55	200		1		0	0	0.447	0.833	1.106	0.211	0.872556	0.911412	0.983403	0.810082	0	0	0	0	65.5	122.3	162.3	146.7	30.9	Peak Found	High	Peak Found	Peak Found	Peak Found	1
FALSE	Medium	Master Protein	Q9Y263	Phospholipase A-2-activating protein OS=Homo sapiens OX=9606 GN=PLAA PE=1 SV=2	0.042	1.646	1	1	1	1	795	87.1	6.37	283		1		0	0	100		100	100	5.33141e-17		5.41217e-17	3.00121e-17					45.7		193.2		228.8	Peak Found	Not Found	Peak Found	Not Found	High	1
FALSE	Medium	Master Protein	A0A590UJS4	Nipped-B protein OS=Homo sapiens OX=9606 GN=NIPBL PE=1 SV=1	0.042	1.638	0	1	1	1	2649	298.7	7.99	242		1		0	0	1.036	2.124	2.035	0.01	0.999286	0.34807	0.496521	3.00121e-17	0	0	0		100.5	206	197.4	97		Peak Found	Peak Found	Peak Found	Peak Found	Not Found	1
FALSE	Medium	Master Protein	Q9NW08	DNA-directed RNA polymerase III subunit RPC2 OS=Homo sapiens OX=9606 GN=POLR3B PE=1 SV=2	0.042	1.638	1	1	1	1	1133	127.7	8.5	290		1		0	0	100	100	100	100	5.33141e-17	6.62708e-17	5.41217e-17	3.00121e-17					199.8	69.7	74.8		13.6	Peak Found	Peak Found	Peak Found	Not Found	Peak Found	1
FALSE	Medium	Master Protein	P50135	Histamine N-methyltransferase OS=Homo sapiens OX=9606 GN=HNMT PE=1 SV=1	0.042	1.636	3	1	1	1	292	33.3	5.34	193		1		0	0		100	100	100		6.62708e-17	5.41217e-17	3.00121e-17						104.7	191.7		13.5	Not Found	Peak Found	Peak Found	Not Found	Peak Found	1
FALSE	Medium	Master Protein	Q8IZ40	REST corepressor 2 OS=Homo sapiens OX=9606 GN=RCOR2 PE=1 SV=2	0.042	1.634	2	1	1	1	523	58	9.01	154		1		0	0	6.208	5.228	5.607	5.171	0.329489	0.00244454	0.000114487	0.745538	0	0	0	0	144.7	121.9	130.7	23.3	120.5	Peak Found	Peak Found	Peak Found	Peak Found	Peak Found	1
FALSE	Medium	Master Protein	Q08378	Golgin subfamily A member 3 OS=Homo sapiens OX=9606 GN=GOLGA3 PE=1 SV=2	0.042	1.634	1	1	2	1	1498	167.3	5.44	362		1		0	0	2.455	1.882	1.983	0.01	0.623529	0.494429	0.617991	3.00121e-17	0	0	0		137.3	105.3	110.9	55.9		Peak Found	Peak Found	Peak Found	Peak Found	Not Found	1
FALSE	Medium	Master Protein	H0Y867	Golgin subfamily B member 1 (Fragment) OS=Homo sapiens OX=9606 GN=GOLGB1 PE=1 SV=1	0.042	1.633	1	1	1	1	1031	118.1	4.82	246		1		0	0	0.712	0.01	1.769	0.289	0.999286	6.62708e-17	0.700251	0.915968	0		0	0	103.4		257	145.3	42	Peak Found	Not Found	Peak Found	Peak Found	Peak Found	1
FALSE	Medium	Master Protein	Q15582	Transforming growth factor-beta-induced protein ig-h3 OS=Homo sapiens OX=9606 GN=TGFBI PE=1 SV=1	0.042	1.631	1	1	2	1	683	74.6	7.71	777		1		0	0	0.698	0.967	1.18	0.01	0.999286	0.986398	0.99817	3.00121e-17	0	0	0		96.8	134	163.6	138.6		High	High	Peak Found	Peak Found	Not Found	1
FALSE	Medium	Master Protein	Q9UIC8	Leucine carboxyl methyltransferase 1 OS=Homo sapiens OX=9606 GN=LCMT1 PE=1 SV=2	0.043	1.63	2	1	1	1	334	38.4	6.04	405		1		0	0																		Not Found	Not Found	Not Found	Not Found	Not Found	1
FALSE	Medium	Master Protein	H0Y8Z9	Complex I assembly factor ACAD9, mitochondrial (Fragment) OS=Homo sapiens OX=9606 GN=ACAD9 PE=1 SV=1	0.043	1.628	3	1	1	1	384	43	8.09	213		1		0	0	0.01	1.008	0.01	0.063	5.33141e-17	0.986398	5.41217e-17	0.494369		0		0		292.8		290.4	18.2	Not Found	Peak Found	Not Found	Peak Found	Peak Found	1
FALSE	Medium	Master Protein	O60656	UDP-glucuronosyltransferase 1A9 OS=Homo sapiens OX=9606 GN=UGT1A9 PE=1 SV=1	0.043	1.627	3	1	1	1	530	59.9	7.9	177		1		0	0		100		100		6.62708e-17		3.00121e-17						176			75.8	Not Found	High	Not Found	Not Found	Peak Found	1
FALSE	Medium	Master Protein	E9PBF6	Lamin-B1 OS=Homo sapiens OX=9606 GN=LMNB1 PE=1 SV=1	0.043	1.626	3	1	1	1	387	44.6	5.05	150		1		0	0	2.346	2.277	2.569	0.01	0.667697	0.279253	0.308163	3.00121e-17	0	0	0		158.3	153.7	173.3	67.5		High	Peak Found	Peak Found	Peak Found	Not Found	1
FALSE	Medium	Master Protein	Q96ED9	Protein Hook homolog 2 OS=Homo sapiens OX=9606 GN=HOOK2 PE=1 SV=3	0.043	1.624	1	1	1	1	719	83.2	5.47	372		1		0	0																		Not Found	Not Found	High	Not Found	Not Found	1
FALSE	Medium	Master Protein	P41247	Patatin-like phospholipase domain-containing protein 4 OS=Homo sapiens OX=9606 GN=PNPLA4 PE=1 SV=3	0.043	1.622	4	1	1	1	253	28	9.11	303		1		0	0	2.266	1.662	1.32	0.333	0.788928	0.674286	0.972863	0.964348	0	0	0	0	123.4	90.5	71.9	54.5	18.1	Peak Found	Peak Found	Peak Found	Peak Found	Peak Found	1
FALSE	Medium	Master Protein	S4R306	Ubiquitin-protein ligase E3A (Fragment) OS=Homo sapiens OX=9606 GN=UBE3A PE=1 SV=2	0.043	1.619	7	1	1	1	189	21.9	8.66	72		1		0	0				100				3.00121e-17									900	Not Found	Not Found	Not Found	Not Found	High	1
FALSE	Medium	Master Protein	P22033	Methylmalonyl-CoA mutase, mitochondrial OS=Homo sapiens OX=9606 GN=MMUT PE=1 SV=4	0.043	1.618	1	1	1	1	750	83.1	6.93	252		1		0	0	4.562	1.036	1.815	4.385	0.153919	0.996923	0.739728	0.268847	0	0	0	0	206.2	46.8	82.1	45.2	198.2	Peak Found	Peak Found	Peak Found	Peak Found	Peak Found	1
FALSE	Medium	Master Protein	P51648	Aldehyde dehydrogenase family 3 member A2 OS=Homo sapiens OX=9606 GN=ALDH3A2 PE=1 SV=1	0.043	1.615	2	1	2	1	485	54.8	7.88	347		1		0	0	0.347	0.599	0.829	0.01	0.704146	0.513727	0.757262	3.00121e-17	0	0	0		68.9	119	164.7	198.7		Peak Found	Peak Found	Peak Found	High	Not Found	1
FALSE	Medium	Master Protein	Q9HC52	Chromobox protein homolog 8 OS=Homo sapiens OX=9606 GN=CBX8 PE=1 SV=3	0.044	1.61	2	1	1	1	389	43.4	9.91	359		1		0	0	0.01	0.61	0.01	0.01	5.33141e-17	0.545305	5.41217e-17	3.00121e-17		0				245.6		402.5		Not Found	Peak Found	Not Found	Peak Found	Not Found	1
FALSE	Medium	Master Protein	A0A3B3ISW7	ESCRT-II complex subunit VPS36 OS=Homo sapiens OX=9606 GN=VPS36 PE=1 SV=1	0.044	1.602	3	1	2	1	324	36.7	8.91	502		1		0	0	10.447	2.915	51.993	1.22	0.144358	0.0944397	5.41217e-17	0.982616	0	0	0	0	81.6	22.8	405.9	7.8	9.5	Peak Found	High	Peak Found	Peak Found	Peak Found	1
FALSE	Medium	Master Protein	K7ELL7	Glucosidase 2 subunit beta OS=Homo sapiens OX=9606 GN=PRKCSH PE=1 SV=1	0.044	1.601	2	1	1	1	535	60.2	4.41	78		1		0	0		100	100	100		6.62708e-17	5.41217e-17	3.00121e-17						270.9	319.9		309.2	Not Found	Peak Found	Peak Found	Not Found	High	1
FALSE	Medium	Master Protein	Q53RT3	Retroviral-like aspartic protease 1 OS=Homo sapiens OX=9606 GN=ASPRV1 PE=1 SV=1	0.044	1.6	4	1	2	1	343	37	5.44	260		1		0	0	0.01	0.01	0.01	0.01	5.33141e-17	6.62708e-17	5.41217e-17	3.00121e-17								491.6		Not Found	Not Found	Not Found	High	Not Found	1
FALSE	Medium	Master Protein	Q8N3L3	Beta-taxilin OS=Homo sapiens OX=9606 GN=TXLNB PE=1 SV=3	0.044	1.598	1	1	1	1	684	76.5	4.93	357		1		0	0	0.756	1.117	1.318	0.318	0.999286	0.986398	0.932017	0.925817	0	0	0	0	95.9	141.7	167.2	126.9	40.3	Peak Found	Peak Found	Peak Found	High	Peak Found	1
FALSE	Medium	Master Protein	P49915	GMP synthase [glutamine-hydrolyzing] OS=Homo sapiens OX=9606 GN=GMPS PE=1 SV=1	0.046	1.596	2	1	5	1	693	76.7	6.87	649		1		0	0	0.317	0.291	0.55	0.097	0.791515	0.0206426	0.145395	0.701739	0	0	0	0	71.5	65.5	124	225.4	21.8	High	Peak Found	Peak Found	Peak Found	Peak Found	1
FALSE	Medium	Master Protein	H7C4C8	T-complex protein 1 subunit theta (Fragment) OS=Homo sapiens OX=9606 GN=CCT8 PE=1 SV=1	0.046	1.593	5	1	1	1	323	35.5	5.96	106		1		0	0	0.395	0.734	1.174	0.01	0.794312	0.813213	0.998113	3.00121e-17	0	0	0		67.1	124.6	199.3	169.7		Peak Found	Peak Found	Peak Found	High	Not Found	1
FALSE	Medium	Master Protein	Q96EL2	28S ribosomal protein S24, mitochondrial OS=Homo sapiens OX=9606 GN=MRPS24 PE=1 SV=1	0.046	1.592	5	1	1	1	167	19	9.38	331		1		0	0	0.598	0.834	0.744	0.01	0.985423	0.911412	0.54049	3.00121e-17	0	0	0		99.7	138.8	123.9	166.5		Peak Found	Peak Found	Peak Found	High	Not Found	1
FALSE	Medium	Master Protein	A0A087X142	Septin-8 OS=Homo sapiens OX=9606 GN=SEPTIN8 PE=1 SV=1	0.046	1.591	2	1	1	1	426	49.3	6.2	262		1		0	0	0.638	1.344	0.941	0.433	0.988291	0.901011	0.88991	0.982616	0	0	0	0	66.9	141	98.7	104.9	45.4	Peak Found	High	Peak Found	Peak Found	Peak Found	1
FALSE	Medium	Master Protein	Q9H6R0	ATP-dependent RNA helicase DHX33 OS=Homo sapiens OX=9606 GN=DHX33 PE=1 SV=2	0.046	1.591	1	1	1	1	707	78.8	8.91	304		1		0	0	8.273	3.618	3.049	12.998	0.0880084	0.0290564	0.174416	0.328235	0	0	0	0	157.1	68.7	57.9	19	246.8	High	Peak Found	Peak Found	Peak Found	Peak Found	1
FALSE	Medium	Master Protein	O15530	3-phosphoinositide-dependent protein kinase 1 OS=Homo sapiens OX=9606 GN=PDPK1 PE=1 SV=1	0.046	1.59	1	1	4	1	556	63.1	7.36	1631		1		0	0	1.426	1.027	3.803	0.059	0.988291	0.993597	0.00556077	0.404493	0	0	0	0	89.7	64.6	239.3	62.9	3.7	High	High	Peak Found	Peak Found	Peak Found	1
FALSE	Medium	Master Protein	Q08188	Protein-glutamine gamma-glutamyltransferase E OS=Homo sapiens OX=9606 GN=TGM3 PE=1 SV=4	0.045	1.59	1	1	1	1	693	76.6	5.86	175		1		0	0	0.309	0.978	0.601	0.155	0.564397	0.986398	0.396993	0.697215	0	0	0	0	48	151.9	93.4	155.4	24.1	Peak Found	High	Peak Found	Peak Found	Peak Found	1
FALSE	Medium	Master Protein	Q96PK6	RNA-binding protein 14 OS=Homo sapiens OX=9606 GN=RBM14 PE=1 SV=2	0.045	1.589	2	1	1	1	669	69.4	9.67	177		1		0	0	100		100	100	5.33141e-17		5.41217e-17	3.00121e-17					40.3		340.3		12.9	Peak Found	Not Found	High	Not Found	Peak Found	1
FALSE	Medium	Master Protein	A8MUD9	60S ribosomal protein L7 OS=Homo sapiens OX=9606 GN=RPL7 PE=1 SV=1	0.045	1.589	9	1	2	1	208	24.4	10.67	115		1		0	0	0.181	0.559	0.482	0.01	0.245956	0.431558	0.168225	3.00121e-17	0	0	0		65.4	202.4	174.5	361.9		Peak Found	High	Peak Found	High	Not Found	1
FALSE	Medium	Master Protein	Q9UJX5	Anaphase-promoting complex subunit 4 OS=Homo sapiens OX=9606 GN=ANAPC4 PE=1 SV=2	0.046	1.582	1	1	2	1	808	92.1	5.53	228		1		0	0	100	100	100		5.33141e-17	6.62708e-17	5.41217e-17						169.6	111.1	129.6			Peak Found	Peak Found	Peak Found	Not Found	Not Found	1
FALSE	Medium	Master Protein	P53701	Cytochrome c-type heme lyase OS=Homo sapiens OX=9606 GN=HCCS PE=1 SV=1	0.046	1.582	6	1	1	1	268	30.6	6.68	14		1		0	0	0.88	0.673	0.765	0.041	0.999286	0.678012	0.57458	0.288959	0	0	0	0	115.3	88.2	100.2	131	5.4	Peak Found	Peak Found	Peak Found	High	Peak Found	1
FALSE	Medium	Master Protein	E9PB18	Endosome/lysosome-associated apoptosis and autophagy regulator 1 (Fragment) OS=Homo sapiens OX=9606 GN=ELAPOR1 PE=1 SV=1	0.046	1.581	2	1	1	1	901	99.3	6.95	85		1		0	0	100	100	100	100	5.33141e-17	6.62708e-17	5.41217e-17	3.00121e-17					70.9	19.3	454		9.4	Peak Found	Peak Found	Peak Found	Not Found	Peak Found	1
FALSE	Medium	Master Protein	C9J7S5	Dol-P-Man:Man(5)GlcNAc(2)-PP-Dol alpha-1,3-mannosyltransferase OS=Homo sapiens OX=9606 GN=ALG3 PE=1 SV=1	0.046	1.581	3	1	1	1	398	45.7	9.28	174		1		0	0	0.906	0.641	1.384	0.302	0.999286	0.610613	0.954599	0.926217	0	0	0	0	114.3	80.9	174.6	126.2	38.2	Peak Found	Peak Found	Peak Found	Peak Found	Peak Found	1
FALSE	Medium	Master Protein	Q86WC4	Osteopetrosis-associated transmembrane protein 1 OS=Homo sapiens OX=9606 GN=OSTM1 PE=1 SV=1	0.046	1.579	3	1	2	1	334	37.2	6.01	307		1		0	0			100				5.41217e-17								746			Not Found	Not Found	High	Not Found	Not Found	1
FALSE	Medium	Master Protein	H7C367	Non-POU domain-containing octamer-binding protein (Fragment) OS=Homo sapiens OX=9606 GN=NONO PE=1 SV=8	0.046	1.577	6	1	1	1	234	28.2	6.46	100		1		0	0	100	100	100		5.33141e-17	6.62708e-17	5.41217e-17						124.2	74.8	218.4			Peak Found	Peak Found	Peak Found	Not Found	Not Found	1
FALSE	Medium	Master Protein	F8WF02	Pyruvate dehydrogenase E1 component subunit beta OS=Homo sapiens OX=9606 GN=PDHB PE=1 SV=1	0.046	1.576	3	1	1	1	251	27.6	7.9	205		1		0	0	0.554	1.036	0.916	0.775	0.972405	0.996923	0.88221	0.982359	0	0	0	0	77.1	144.1	127.4	139.1	107.8	Peak Found	Peak Found	Peak Found	High	Peak Found	1
FALSE	Medium	Master Protein	O43172	U4/U6 small nuclear ribonucleoprotein Prp4 OS=Homo sapiens OX=9606 GN=PRPF4 PE=1 SV=2	0.046	1.576	2	1	3	1	522	58.4	7.42	626		1		0	0	14.885	6.703	5.468	29.957	0.0734047	0.00034396	0.00231499	0.33283	0	0	0	0	129.6	58.4	47.6	8.7	260.9	High	Peak Found	Peak Found	Peak Found	Peak Found	1
FALSE	Medium	Master Protein	H7C4A0	Serine/threonine-protein phosphatase 6 regulatory ankyrin repeat subunit B (Fragment) OS=Homo sapiens OX=9606 GN=ANKRD44 PE=1 SV=1	0.046	1.576	4	1	1	1	316	34.4	6.35	228		1		0	0	0.968	0.803	1.32	0.316	0.999286	0.879026	0.954707	0.94193	0	0	0	0	108.2	89.8	147.6	111.8	35.4	Peak Found	Peak Found	Peak Found	Peak Found	Peak Found	1
FALSE	Medium	Master Protein	O00462	Beta-mannosidase OS=Homo sapiens OX=9606 GN=MANBA PE=1 SV=3	0.046	1.57	1	1	2	1	879	100.8	5.52	569		1		0	0	0.692	0.887	1.337	0.558	0.999286	0.950576	0.956009	0.999163	0	0	0	0	90.4	115.9	174.8	130.7	73	Peak Found	Peak Found	High	High	Peak Found	1
FALSE	Medium	Master Protein	Q86VP1	Tax1-binding protein 1 OS=Homo sapiens OX=9606 GN=TAX1BP1 PE=1 SV=2	0.046	1.569	1	1	1	1	789	90.8	5.43	253		1		0	0				100				3.00121e-17									900	Not Found	Not Found	Not Found	Not Found	High	1
FALSE	Medium	Master Protein	P16152	Carbonyl reductase [NADPH] 1 OS=Homo sapiens OX=9606 GN=CBR1 PE=1 SV=3	0.046	1.565	3	1	2	1	277	30.4	8.32	463		1		0	0	1.435	0.874	1.445	0.01	0.962576	0.948088	0.92938	3.00121e-17	0	0	0		124.4	75.7	125.3	86.7		Peak Found	Peak Found	Peak Found	Peak Found	Not Found	1
FALSE	Medium	Master Protein	A0A3B3ITK9	Aspartate--tRNA ligase, mitochondrial (Fragment) OS=Homo sapiens OX=9606 GN=DARS2 PE=1 SV=1	0.046	1.565	8	1	1	1	295	33.9	5.66	28		1		0	0																		Not Found	Not Found	Not Found	Not Found	Not Found	1
FALSE	Medium	Master Protein	Q8N4V1	Membrane magnesium transporter 1 OS=Homo sapiens OX=9606 GN=MMGT1 PE=1 SV=1	0.046	1.565	18	1	1	1	131	14.7	9.16	25		1		0	0			100				5.41217e-17								300			Not Found	Not Found	High	Not Found	Not Found	1
FALSE	Medium	Master Protein	Q9BWD1	Acetyl-CoA acetyltransferase, cytosolic OS=Homo sapiens OX=9606 GN=ACAT2 PE=1 SV=2	0.046	1.564	2	1	2	1	397	41.3	6.92	673		1		0	0	1.202	1.15	1.277	0.892	0.999286	0.986398	0.983403	0.971716	0	0	0	0	110.8	106	117.7	92.2	82.2	Peak Found	Peak Found	Peak Found	High	High	1
FALSE	Medium	Master Protein	Q12769	Nuclear pore complex protein Nup160 OS=Homo sapiens OX=9606 GN=NUP160 PE=1 SV=3	0.046	1.563	1	1	4	1	1436	162	5.5	925		1		0	0	0.437	1.142	0.966	0.184	0.916708	0.986398	0.919134	0.812822	0	0	0	0	65	170	143.8	148.8	27.4	Peak Found	High	Peak Found	Peak Found	Peak Found	1
FALSE	Medium	Master Protein	B8ZZM6	Integral membrane protein 2 OS=Homo sapiens OX=9606 GN=ITM2C PE=1 SV=2	0.046	1.562	4	1	2	1	205	23.9	7.01	411		1		0	0	100			100	5.33141e-17			3.00121e-17					259.4				204.2	Peak Found	Not Found	Not Found	Not Found	High	1
FALSE	Medium	Master Protein	Q16222	UDP-N-acetylhexosamine pyrophosphorylase OS=Homo sapiens OX=9606 GN=UAP1 PE=1 SV=3	0.047	1.556	3	1	1	1	522	58.7	6.33	15		1		0	0	1.054	0.329	0.01	0.01	0.999286	0.0432763	5.41217e-17	3.00121e-17	0	0			203.3	63.4		192.9		Peak Found	Peak Found	Not Found	Peak Found	Not Found	1
FALSE	Medium	Master Protein	Q17RN3	Protein FAM98C OS=Homo sapiens OX=9606 GN=FAM98C PE=2 SV=1	0.047	1.555	5	1	1	1	349	37.3	7.18	171		1		0	0	0.862	1.252	0.969	0.923	0.999286	0.950576	0.924338	0.989021	0	0	0	0	98.8	143.4	111	114.6	105.8	High	Peak Found	Peak Found	Peak Found	Peak Found	1
FALSE	Medium	Master Protein	H7BZF9	Lysine-specific demethylase 5D (Fragment) OS=Homo sapiens OX=9606 GN=KDM5D PE=1 SV=1	0.047	1.553	3	1	1	1	293	32.2	5.31	238		1		0	0	100				5.33141e-17								287.8					Peak Found	Not Found	Not Found	Not Found	Not Found	1
FALSE	Medium	Master Protein	P20941	Phosducin OS=Homo sapiens OX=9606 GN=PDC PE=1 SV=1	0.047	1.549	7	1	1	1	246	28.2	5.14	89		1		0	0																		Not Found	Not Found	Not Found	Not Found	Not Found	1
FALSE	Medium	Master Protein	Q86SE5	RNA-binding Raly-like protein OS=Homo sapiens OX=9606 GN=RALYL PE=1 SV=2	0.047	1.549	2	1	1	1	291	32.3	7.93	407		1		0	0	0.302	0.611	0.696	0.136	0.705386	0.545305	0.404713	0.740601	0	0	0	0	57.4	116.1	132.2	190	25.8	Peak Found	Peak Found	Peak Found	Peak Found	Peak Found	1
FALSE	Medium	Master Protein	H3BT29	Protein PML (Fragment) OS=Homo sapiens OX=9606 GN=PML PE=1 SV=1	0.047	1.538	10	1	1	1	240	26.5	5.68	14		1		0	0			100				5.41217e-17								631.6			Not Found	Not Found	Peak Found	Not Found	Not Found	1
FALSE	Medium	Master Protein	O94964	Protein SOGA1 OS=Homo sapiens OX=9606 GN=SOGA1 PE=1 SV=2	0.048	1.532	0	1	1	1	1423	159.7	6.46	292		1		0	0																		Not Found	Not Found	High	Not Found	Not Found	1
FALSE	Medium	Master Protein	Q53EZ4	Centrosomal protein of 55 kDa OS=Homo sapiens OX=9606 GN=CEP55 PE=1 SV=3	0.048	1.532	2	1	1	1	464	54.1	7.01	314		1		0	0	100				5.33141e-17								241.4					Peak Found	Not Found	Not Found	Not Found	Not Found	1
FALSE	Medium	Master Protein	D6RIH3	Transcription elongation factor A protein-like 4 (Fragment) OS=Homo sapiens OX=9606 GN=TCEAL4 PE=1 SV=1	0.048	1.531	9	1	1	1	76	8.6	4.65	308		1		0	0	100		100		5.33141e-17		5.41217e-17						61.7		400.1			Peak Found	Not Found	High	Not Found	Not Found	1
FALSE	Medium	Master Protein	A6NFX8	ADP-sugar pyrophosphatase OS=Homo sapiens OX=9606 GN=NUDT5 PE=1 SV=1	0.048	1.531	4	1	1	1	232	25.9	5.19	162		1		0	0	0.01	0.727	0.01	0.01	5.33141e-17	0.80174	5.41217e-17	3.00121e-17		0				206.9		284.4		Not Found	Peak Found	Not Found	Peak Found	Not Found	1
FALSE	Medium	Master Protein	H7C3N6	Anoctamin (Fragment) OS=Homo sapiens OX=9606 GN=ANO10 PE=1 SV=1	0.048	1.529	5	1	1	1	188	20.8	7.15	170		1		0	0	0.619	0.645	0.952	0.01	0.985423	0.616849	0.924488	3.00121e-17	0	0	0		99.6	103.7	153.1	160.8		Peak Found	Peak Found	Peak Found	Peak Found	Not Found	1
FALSE	Medium	Master Protein	O60244	Mediator of RNA polymerase II transcription subunit 14 OS=Homo sapiens OX=9606 GN=MED14 PE=1 SV=2	0.048	1.529	1	1	1	1	1454	160.5	8.73	293		1		0	0	11.371	2.637	2.375	1.608	0.121875	0.151266	0.193841	0.904138	0	0	0	0	229.9	53.3	48	20.2	32.5	Peak Found	Peak Found	Peak Found	Peak Found	Peak Found	1
FALSE	Medium	Master Protein	Q14573	Inositol 1,4,5-trisphosphate receptor type 3 OS=Homo sapiens OX=9606 GN=ITPR3 PE=1 SV=2	0.049	1.528	0	1	1	1	2671	303.9	6.48	223		1		0	0	0.884	0.431	0.419	0.907	0.999286	0.167276	0.0268238	0.991862	0	0	0	0	125.1	61	59.2	141.5	128.3	Peak Found	Peak Found	High	Peak Found	Peak Found	1
FALSE	Medium	Master Protein	H0YAR1	Lysyl oxidase homolog 2 (Fragment) OS=Homo sapiens OX=9606 GN=LOXL2 PE=1 SV=1	0.049	1.527	8	1	1	1	207	22.4	7.09	76		1		0	0	100	100		100	5.33141e-17	6.62708e-17		3.00121e-17					160.2	157.4			390.7	Peak Found	Peak Found	Not Found	Not Found	High	1
FALSE	Medium	Master Protein	E9PPV6	Serpin H1 OS=Homo sapiens OX=9606 GN=SERPINH1 PE=1 SV=1	0.049	1.527	2	1	1	1	324	35.6	9.07	295		1		0	0	0.838	1.412	1.446	0.401	0.999286	0.862357	0.92938	0.982616	0	0	0	0	90.2	152	155.6	107.6	43.2	Peak Found	Peak Found	Peak Found	High	Peak Found	1
FALSE	Medium	Master Protein	A0A3B3ITT5	60S ribosomal protein L29 OS=Homo sapiens OX=9606 GN=RPL29 PE=1 SV=1	0.049	1.526	9	1	1	1	167	18.5	11.55	83		1		0	0	0.01	0.01	0.01	0.01	5.33141e-17	6.62708e-17	5.41217e-17	3.00121e-17								900		Not Found	Not Found	Not Found	High	Not Found	1
FALSE	Medium	Master Protein	H0YF30	Phospholipase DDHD2 (Fragment) OS=Homo sapiens OX=9606 GN=DDHD2 PE=1 SV=1	0.049	1.526	4	1	1	1	183	20.5	6.87	299		1		0	0		100	100	100		6.62708e-17	5.41217e-17	3.00121e-17						142.8	120.3		348.5	Not Found	Peak Found	Peak Found	Not Found	High	1
FALSE	Medium	Master Protein	A0A075B6E5	Protein enabled homolog (Fragment) OS=Homo sapiens OX=9606 GN=ENAH PE=1 SV=2	0.049	1.525	5	1	1	1	213	24.9	7.87	206		1		0	0																		Not Found	Not Found	Not Found	High	Not Found	1
FALSE	Medium	Master Protein	E5RG43	Carbonic anhydrase (Fragment) OS=Homo sapiens OX=9606 GN=CA1 PE=1 SV=1	0.05	1.518	16	1	1	1	149	16.4	6.25	42		1		0	0	0.01	0.01	0.01	0.01	5.33141e-17	6.62708e-17	5.41217e-17	3.00121e-17								246.6		Not Found	Not Found	Not Found	High	Not Found	1
FALSE	Medium	Master Protein	F2Z2F1	Myoglobin (Fragment) OS=Homo sapiens OX=9606 GN=MB PE=1 SV=1	0.05	1.515	8	1	1	1	106	11.9	8.38	111		1		0	0	0.949	0.828	1.451	0.525	0.999286	0.901569	0.894219	0.993586	0	0	0	0	109.3	95.3	167	115.1	60.5	Peak Found	Peak Found	Peak Found	Peak Found	Peak Found	1
FALSE	Medium	Master Protein	O00391	Sulfhydryl oxidase 1 OS=Homo sapiens OX=9606 GN=QSOX1 PE=1 SV=3	0.05	1.514	1	1	3	1	747	82.5	8.92	882		1		0	0	0.938	0.826	0.908	0.512	0.99939	0.901011	0.852019	0.982616	0	0	0	0	108.8	95.7	105.2	115.9	59.3	Peak Found	Peak Found	High	Peak Found	Peak Found	1
FALSE	Low	Master Protein	Q8IWS0	PHD finger protein 6 OS=Homo sapiens OX=9606 GN=PHF6 PE=1 SV=1	0.051	1.511	5	1	1	1	365	41.3	8.68	24		1		0	0	100		100		5.33141e-17		5.41217e-17						140.4		429			Peak Found	Not Found	High	Not Found	Not Found	1
FALSE	Low	Master Protein	Q9UJV8	Purine-rich element-binding protein gamma OS=Homo sapiens OX=9606 GN=PURG PE=2 SV=1	0.051	1.509	2	1	2	1	347	39.5	9.55	755		1		0	0	1.262	2.526	1.964	12.828	0.999286	0.183618	0.502859	0.541004	0	0	0	0	49.6	99.3	77.2	39.3	504.2	Peak Found	High	High	Peak Found	Peak Found	1
FALSE	Low	Master Protein	Q8NBP0	Tetratricopeptide repeat protein 13 OS=Homo sapiens OX=9606 GN=TTC13 PE=2 SV=3	0.051	1.509	2	1	1	1	860	96.8	7.01	182		1		0	0	100	100	100	100	5.33141e-17	6.62708e-17	5.41217e-17	3.00121e-17					126.1	61.1	112.2		122.2	Peak Found	Peak Found	Peak Found	Not Found	High	1
FALSE	Low	Master Protein	E7ESP9	160 kDa neurofilament protein OS=Homo sapiens OX=9606 GN=NEFM PE=1 SV=1	0.051	1.508	1	1	2	1	877	98.3	4.86	505		1		0	0	0.463	0.411	0.765	0.106	0.936835	0.134891	0.581801	0.723844	0	0	0	0	91.1	80.9	150.5	196.8	20.8	Peak Found	High	Peak Found	Peak Found	Peak Found	1
FALSE	Low	Master Protein	A0A5H1ZRP4	Negative elongation factor B OS=Homo sapiens OX=9606 GN=NELFB PE=1 SV=1	0.051	1.506	1	1	1	1	628	70	6.04	362		1		0	0	4.248	0.01	7.274	0.01	0.420414	6.62708e-17	2.66496e-05	3.00121e-17	0		0		214.6		367.4	50.5		Peak Found	Not Found	High	Peak Found	Not Found	1
FALSE	Low	Master Protein	A0A2R8Y595	Transcriptional repressor CTCF OS=Homo sapiens OX=9606 GN=CTCF PE=1 SV=1	0.051	1.504	3	1	1	1	638	73	8.28	22		1		0	0	100	100		100	5.33141e-17	6.62708e-17		3.00121e-17					137.3	216.1			105.9	Peak Found	High	Not Found	Not Found	Peak Found	1
FALSE	Low	Master Protein	P49916	DNA ligase 3 OS=Homo sapiens OX=9606 GN=LIG3 PE=1 SV=2	0.051	1.503	1	1	1	1	1009	112.8	9.01	135		1		0	0	100	100		100	5.33141e-17	6.62708e-17		3.00121e-17					140	199.8			437	Peak Found	Peak Found	Not Found	Not Found	High	1
FALSE	Low	Master Protein	Q6VN20	Ran-binding protein 10 OS=Homo sapiens OX=9606 GN=RANBP10 PE=1 SV=1	0.051	1.503	1	1	4	1	620	67.2	6.77	1263		1		0	0	0.887	0.753	1.105	0.624	0.999286	0.826764	0.987625	0.982616	0	0	0	0	107.1	91	133.5	120.8	75.4	Peak Found	High	High	Peak Found	Peak Found	1
FALSE	Low	Master Protein	P41219	Peripherin OS=Homo sapiens OX=9606 GN=PRPH PE=1 SV=2	0.051	1.502	1	1	1	1	470	53.6	5.47	322		1		0	0	1.209	0.01	1.364	3.262	0.987133	6.62708e-17	0.963133	0.36497	0		0	0	139.9		157.9	115.7	377.6	Peak Found	Not Found	Peak Found	Peak Found	High	1
FALSE	Low	Master Protein	A0A2R8Y880	E3 ubiquitin-protein ligase RBBP6 (Fragment) OS=Homo sapiens OX=9606 GN=RBBP6 PE=1 SV=1	0.051	1.501	0	1	3	1	1759	197.2	9.55	906		1		0	0	100	100	100	100	5.33141e-17	6.62708e-17	5.41217e-17	3.00121e-17					145.6	82.7	33.9		289.2	High	High	Peak Found	Not Found	Peak Found	1
FALSE	Low	Master Protein	Q9BZH6	WD repeat-containing protein 11 OS=Homo sapiens OX=9606 GN=WDR11 PE=1 SV=1	0.051	1.501	1	1	2	1	1224	136.6	6.92	199		1		0	0	2.182	0.26	0.617	0.43	0.86618	0.0101839	0.363863	0.982616	0	0	0	0	216	25.8	61.1	99	42.6	High	Peak Found	Peak Found	Peak Found	Peak Found	1
FALSE	Low	Master Protein	P30520	Adenylosuccinate synthetase isozyme 2 OS=Homo sapiens OX=9606 GN=ADSS2 PE=1 SV=3	0.051	1.5	2	1	1	1	456	50.1	6.55	224		1		0	0	2.105	1.965	1.743	0.178	0.903614	0.44128	0.551877	0.801017	0	0	0	0	110.1	102.8	91.2	52.3	9.3	Peak Found	High	Peak Found	Peak Found	Peak Found	1
FALSE	Low	Master Protein	J3QRV4	Coronin (Fragment) OS=Homo sapiens OX=9606 GN=CORO6 PE=1 SV=1	0.052	1.499	5	1	1	1	198	21.7	6.87	226		1		0	0			100				5.41217e-17								370.7			Not Found	Not Found	Peak Found	Not Found	Not Found	1
FALSE	Low	Master Protein	O60486	Plexin-C1 OS=Homo sapiens OX=9606 GN=PLXNC1 PE=1 SV=1	0.052	1.497	1	1	1	1	1568	175.6	7.61	163		1		0	0	100	100	100	100	5.33141e-17	6.62708e-17	5.41217e-17	3.00121e-17					135	79.3	50.3		383.7	Peak Found	Peak Found	Peak Found	Not Found	Peak Found	1
FALSE	Low	Master Protein	P02008	Hemoglobin subunit zeta OS=Homo sapiens OX=9606 GN=HBZ PE=1 SV=2	0.052	1.493	6	1	1	1	142	15.6	8.21	145		1		0	0																		Not Found	Not Found	Not Found	Not Found	Not Found	1
FALSE	Low	Master Protein	O14604	Thymosin beta-4, Y-chromosomal OS=Homo sapiens OX=9606 GN=TMSB4Y PE=1 SV=3	0.055	1.486	18	1	1	1	44	5	5.36	235		1		0	0	100			100	5.33141e-17			3.00121e-17					162.9				467	Peak Found	Not Found	Not Found	Not Found	High	1
FALSE	Low	Master Protein	Q9NP58	ATP-binding cassette sub-family B member 6, mitochondrial OS=Homo sapiens OX=9606 GN=ABCB6 PE=1 SV=1	0.055	1.485	1	1	1	1	842	93.8	8.48	226		1		0	0	0.904	1.228	1.921	0.629	0.999286	0.966518	0.599346	0.982616	0	0	0	0	86	116.8	182.8	95.2	59.8	Peak Found	Peak Found	Peak Found	Peak Found	Peak Found	1

## Sheet: Replicate B
Checked	Protein FDR Confidence: Combined	Master	Accession	Description	Exp. q-value: Combined	Sum PEP Score	Coverage [%]	# Peptides	# PSMs	# Unique Peptides	# AAs	MW [kDa]	calc. pI	Score MSPepSearch: MSPepSearch	Score Sequest HT: Sequest HT	# Peptides (by Search Engine): MSPepSearch	# Peptides (by Search Engine): Sequest HT	# Protein Pathway Groups	# Razor Peptides	Abundance Ratio: (B5_D6_1a500_100uM) / (B5_D6_1a500_CTRL)	Abundance Ratio: (B5_D6_1a500_10uM) / (B5_D6_1a500_CTRL)	Abundance Ratio: (B5_D6_1a500_1uM) / (B5_D6_1a500_CTRL)	Abundance Ratio: (B5_D6_lisato) / (B5_D6_1a500_CTRL)	Abundance Ratio Adj. P-Value: (B5_D6_1a500_100uM) / (B5_D6_1a500_CTRL)	Abundance Ratio Adj. P-Value: (B5_D6_1a500_10uM) / (B5_D6_1a500_CTRL)	Abundance Ratio Adj. P-Value: (B5_D6_1a500_1uM) / (B5_D6_1a500_CTRL)	Abundance Ratio Adj. P-Value: (B5_D6_lisato) / (B5_D6_1a500_CTRL)	Abundance Ratio Variability [%]: (B5_D6_1a500_100uM) / (B5_D6_1a500_CTRL)	Abundance Ratio Variability [%]: (B5_D6_1a500_10uM) / (B5_D6_1a500_CTRL)	Abundance Ratio Variability [%]: (B5_D6_1a500_1uM) / (B5_D6_1a500_CTRL)	Abundance Ratio Variability [%]: (B5_D6_lisato) / (B5_D6_1a500_CTRL)	Abundances (Grouped): B5_D5_1a500_100uM	Abundances (Grouped): B5_D5_1a500_10uM	Abundances (Grouped): B5_D5_1a500_1uM	Abundances (Grouped): B5_D5_1a500_CTRL	Abundances (Grouped): B5_D5_lisato	Abundances (Grouped): B5_D6_1a500_100uM	Abundances (Grouped): B5_D6_1a500_10uM	Abundances (Grouped): B5_D6_1a500_1uM	Abundances (Grouped): B5_D6_1a500_CTRL	Abundances (Grouped): B5_D6_lisato	Found in Sample: [S12] F12: Sample, B5_D6_1a500_100uM	Found in Sample: [S11] F11: Sample, B5_D6_1a500_10uM	Found in Sample: [S10] F10: Sample, B5_D6_1a500_1uM	Found in Sample: [S13] F13: Sample, B5_D6_1a500_CTRL	Found in Sample: [S18] F18: Sample, B5_D6_lisato	# Protein Groups	Modifications
FALSE	High	Master Protein	P21333	Filamin-A OS=Homo sapiens OX=9606 GN=FLNA PE=1 SV=4	0	810.207	60	149	2254	134	2647	280.6	6.06	1004399	0	149	1	0	17	1.213	1.244	0.896	0.266	0.858057	0.937061	0.945686	0.79616	35.71	38.72	69.17	128.38	93.5	119.5	105	90.5	72.7	114.8	114.3	87.4	91.8	72.7	High	High	High	High	High	1
FALSE	High	Master Protein	O75369	Filamin-B OS=Homo sapiens OX=9606 GN=FLNB PE=1 SV=2	0	540.109	47	114	1297	100	2602	278	5.73	537627		114		0	0	1.269	1.202	1.079	0.14	0.833387	0.959531	0.973788	0.568323	44.1	35.43	54.81	90.31	114.2	131.4	136.5	115	30.7	144.3	139.4	123.5	122.5	18.6	High	High	High	High	High	1
FALSE	High	Master Protein	P35579	Myosin-9 OS=Homo sapiens OX=9606 GN=MYH9 PE=1 SV=4	0	477.926	48	108	1068	93	1960	226.4	5.6	429869		108		0	16	1.458	1.205	1.413	0.096	0.593882	0.959531	0.707432	0.41079	38.59	41.3	56.32	107.47	128.3	100.6	156.3	122.3	17.7	181.7	154.1	187.2	122.7	12	High	High	High	High	High	1
FALSE	High	Master Protein	P46940	Ras GTPase-activating-like protein IQGAP1 OS=Homo sapiens OX=9606 GN=IQGAP1 PE=1 SV=1	0	475.496	45	80	1366	74	1657	189.1	6.48	642293	0	80	2	0	8	1.292	1.451	0.992	2.595	0.803183	0.779981	0.992326	0.608668	47.96	43.2	42.08	116.16	64.2	99.8	67	58.8	111	89.1	95.7	75.6	83	106.8	High	High	High	High	High	1
FALSE	High	Master Protein	P13639	Elongation factor 2 OS=Homo sapiens OX=9606 GN=EEF2 PE=1 SV=4	0	472.782	55	68	1417	66	858	95.3	6.83	723745	7.68	68	2	0	2	2.35	3.188	1.806	11.422	0.0345874	0.00495371	0.331275	0.0908634	46.62	62.01	47.3	71.13	23.2	33.6	26.9	27	93.3	41.7	59.9	29	18.9	205.8	High	High	High	High	High	1
FALSE	High	Master Protein	P55072	Transitional endoplasmic reticulum ATPase OS=Homo sapiens OX=9606 GN=VCP PE=1 SV=4	0	433.314	68	74	1031	74	806	89.3	5.26	504129	11.35	73	6	0	0	0.979	1.026	0.736	0.521	0.925087	0.977717	0.751919	0.965824	46.68	65.98	55.12	76.26	92.6	114.4	82.4	92.8	41.5	122.8	128.7	99	121.7	70.1	High	High	High	High	High	1
FALSE	High	Master Protein	P07900	Heat shock protein HSP 90-alpha OS=Homo sapiens OX=9606 GN=HSP90AA1 PE=1 SV=5	0	431.25	64	65	1089	38	732	84.6	5.02	527275	1.79	65	1	0	0	1.969	1.526	0.796	15.649	0.136136	0.701793	0.838427	0.0498597	56.25	30.02	57.04	53.76	30.5	47.9	27	35.6	293.3	32.9	26.3	14	16.3	256.4	High	High	High	High	High	1
FALSE	High	Master Protein	P08238	Heat shock protein HSP 90-beta OS=Homo sapiens OX=9606 GN=HSP90AB1 PE=1 SV=4	0	422.454	71	67	1029	38	724	83.2	5.03	481038	1.79	67	2	0	29	1.618	1.464	0.793	11.379	0.40207	0.765483	0.83599	0.0914571	44.66	35.76	46.91	68.42	36.2	50.8	34	40.1	359.2	41.1	34.5	20.7	22.7	311.9	High	High	High	High	High	1
FALSE	High	Master Protein	P14625	Endoplasmin OS=Homo sapiens OX=9606 GN=HSP90B1 PE=1 SV=1	0	397.328	65	67	876	64	803	92.4	4.84	422246	0	67	1	0	4	1.881	2.428	0.905	10.444	0.183116	0.0588235	0.946121	0.106916	41.47	33.73	31.17	49.44	16.4	41.8	15.8	16.8	140.1	24.8	29.8	11.3	12.6	144.1	High	High	High	High	High	1
FALSE	High	Master Protein	P18206	Vinculin OS=Homo sapiens OX=9606 GN=VCL PE=1 SV=4	0	380.198	52	73	853	73	1134	123.7	5.66	394647		73		0	0	0.872	1.171	1.367	0.111	0.832786	0.970439	0.759771	0.47781	30.59	22.51	40.95	66.82	53	49.1	54.6	62.6	10.3	61.2	78.7	84.6	64.9	7.6	High	High	High	High	High	1
FALSE	High	Master Protein	P49327	Fatty acid synthase OS=Homo sapiens OX=9606 GN=FASN PE=1 SV=3	0	362.086	35	78	885	78	2511	273.3	6.44	390482	3.66	77	2	0	0	1.674	1.462	1.454	0.315	0.3481	0.768366	0.676599	0.858899	43.32	45.3	44.94	101.61	84.1	81.3	113.9	76.8	39.6	183.8	174.3	185.6	115.3	32.7	High	High	High	High	High	1	Acetyl [N-Term]
FALSE	High	Master Protein	P11021	Endoplasmic reticulum chaperone BiP OS=Homo sapiens OX=9606 GN=HSPA5 PE=1 SV=2	0	346.645	63	58	1023	55	654	72.3	5.16	466290		58		0	3	1.618	0.546	0.286	1.176	0.40207	0.140802	0.00329132	0.883959	47.95	46.94	38.27	64.64	213.8	109.7	163.1	263	192.1	90.8	30.9	20.6	55.4	77.5	High	High	High	High	High	1
FALSE	High	Master Protein	P04264	Keratin, type II cytoskeletal 1 OS=Homo sapiens OX=9606 GN=KRT1 PE=1 SV=6	0	319.623	69	68	876	57	644	66	8.12	396608		68		0	11	0.755	0.764	1.245	0.191	0.581872	0.695878	0.863221	0.680508	74.02	48.02	98.52	83.09	220	110.7	195.9	116.5	55.8	87.4	112.8	131	181.7	28.5	High	High	High	High	High	1
FALSE	High	Master Protein	P13667	Protein disulfide-isomerase A4 OS=Homo sapiens OX=9606 GN=PDIA4 PE=1 SV=2	0	317.441	59	51	1020	51	645	72.9	5.07	464799	0	51	1	0	0	1.158	0.728	0.299	0.538	0.903949	0.616067	0.00502337	0.970422	31.91	32.93	39.99	68.95	107.3	139.4	116.3	117.4	92.3	110	68.4	29.2	90.9	54.3	High	High	High	High	High	1
FALSE	High	Master Protein	P26639	Threonine--tRNA ligase 1, cytoplasmic OS=Homo sapiens OX=9606 GN=TARS1 PE=1 SV=3	0	301.401	59	46	1087	46	723	83.4	6.67	489531		46		0	0	1.016	1.074	1.06	0.668	0.961031	0.997302	0.981587	0.987665	38.78	35.44	37.58	100.44	83.9	105.2	91.5	82	82.3	122.4	132.6	132.3	129.1	78.1	High	High	High	High	High	1
FALSE	High	Master Protein	O43707	Alpha-actinin-4 OS=Homo sapiens OX=9606 GN=ACTN4 PE=1 SV=2	0	300.521	62	59	616	39	911	104.8	5.44	229847	0	59	1	0	21	1.083	1.514	1.196	0.29	0.966567	0.713124	0.910925	0.823729	43.55	47.28	58.26	101.01	49.9	52.4	59.5	66.6	19.6	64.4	80.4	63.8	56.6	19.4	High	High	High	High	High	1
FALSE	High	Master Protein	Q8WUM4	Programmed cell death 6-interacting protein OS=Homo sapiens OX=9606 GN=PDCD6IP PE=1 SV=1	0	297.506	53	55	853	55	868	96	6.52	416823	7.59	53	4	0	0	0.966	0.969	0.831	0.516	0.910243	0.95948	0.887521	0.9628	27.76	20.68	42.61	62.62	89.9	116.6	91.9	87.1	71.5	133.4	125.8	113.6	125.7	67.7	High	High	High	High	High	1	Met-loss+Acetyl [N-Term]
FALSE	High	Master Protein	P78527	DNA-dependent protein kinase catalytic subunit OS=Homo sapiens OX=9606 GN=PRKDC PE=1 SV=3	0	266.375	18	72	552	71	4128	468.8	7.12	235896		72		0	1	1.382	1.485	1.355	0.571	0.691193	0.741508	0.775065	0.978433	37.09	23.44	34.87	92.75	87.6	77.8	92.4	68	45.5	111.3	111.2	155.5	90.9	88.9	High	High	High	High	High	1
FALSE	High	Master Protein	P26038	Moesin OS=Homo sapiens OX=9606 GN=MSN PE=1 SV=3	0	261.241	64	56	475	39	577	67.8	6.4	226205		56		0	19	1.172	1.036	0.782	4.856	0.894089	0.978802	0.830285	0.346208	27.36	23.63	41.42	59.26	55.7	90.8	56.5	49.3	361.4	32.3	26.2	18.6	24.1	165.8	High	High	High	High	High	1
FALSE	High	Master Protein	P22314	Ubiquitin-like modifier-activating enzyme 1 OS=Homo sapiens OX=9606 GN=UBA1 PE=1 SV=3	0	256.36	43	52	785	52	1058	117.8	5.76	350834	2.07	52	2	0	0	0.815	0.939	0.969	0.062	0.71656	0.930271	0.98375	0.232087	43.09	44.74	34.48	117.89	105.6	137.8	103.6	117.5	12.3	129.8	147.3	144.7	159.8	9.3	High	High	High	High	High	1
FALSE	High	Master Protein	Q14204	Cytoplasmic dynein 1 heavy chain 1 OS=Homo sapiens OX=9606 GN=DYNC1H1 PE=1 SV=5	0	256.288	16	79	435	79	4646	532.1	6.4	170252		79		0	0	1.213	1.186	1.195	0.134	0.859094	0.961935	0.912055	0.556145	33.22	29.31	33.85	90.1	108.9	109.8	139.1	91.4	63.2	178.3	164.2	172.4	148.1	27.1	High	High	High	High	Peak Found	1
FALSE	High	Master Protein	P07814	Bifunctional glutamate/proline--tRNA ligase OS=Homo sapiens OX=9606 GN=EPRS1 PE=1 SV=5	0	245.13	36	53	502	52	1512	170.5	7.33	218923		53		0	1	1.187	1.496	0.991	1.578	0.888859	0.729897	0.991621	0.785273	34.35	30.18	39.35	63.62	47.1	91.3	50.3	42.3	102.9	61.1	73.9	47.7	48.6	88.2	High	High	High	High	High	1
FALSE	High	Master Protein	P14618	Pyruvate kinase PKM OS=Homo sapiens OX=9606 GN=PKM PE=1 SV=4	0	229.507	67	44	571	3	531	57.9	7.84	263308		44		0	49	0.862	0.97	0.835	0.229	0.814458	0.95948	0.893378	0.752863	31.58	40.38	40.43	76.95	141.3	144.9	164.1	178.2	36.4	95.3	99.3	90.1	107.2	22.3	Peak Found	High	High	High	High	1
FALSE	High	Master Protein	P31327	Carbamoyl-phosphate synthase [ammonia], mitochondrial OS=Homo sapiens OX=9606 GN=CPS1 PE=1 SV=2	0	229.325	35	54	568	51	1500	164.8	6.74	234574	0	54	1	0	3	1.449	1.224	1.416	0.228	0.603115	0.954178	0.70516	0.750375	31.63	27.93	36.2	45.86	98.6	103.4	126.9	83.1	48.4	170	148.1	176.1	128.9	28.7	High	High	High	High	High	1
FALSE	High	Master Protein	P05023	Sodium/potassium-transporting ATPase subunit alpha-1 OS=Homo sapiens OX=9606 GN=ATP1A1 PE=1 SV=1	0	221.687	44	43	680	43	1023	112.8	5.49	293206		43		0	0	1.268	1.198	1.257	0.524	0.834518	0.959531	0.851197	0.967031	28.9	17.04	41.99	44.51	75.3	87.7	94.3	58.6	79.7	145.7	140.4	135.4	118.6	67.4	High	High	High	High	High	1
FALSE	High	Master Protein	Q14697	Neutral alpha-glucosidase AB OS=Homo sapiens OX=9606 GN=GANAB PE=1 SV=3	0	217.605	36	42	650	42	944	106.8	6.14	308527		42		0	0	1.065	1.1	1.151	0.333	0.986591	0.997302	0.937923	0.873074	24.73	34.4	69.72	80.33	96.7	128.1	100.1	86.7	51.6	133.2	142.3	145.4	142.6	37	High	High	High	High	High	1
FALSE	High	Master Protein	P13645	Keratin, type I cytoskeletal 10 OS=Homo sapiens OX=9606 GN=KRT10 PE=1 SV=6	0	217.343	52	46	614	37	584	58.8	5.21	281576		46		0	12	1.147	0.828	1.051	0.262	0.910243	0.807597	0.983729	0.790729	31.97	50.04	108.11	82.52	190.7	111.7	158.4	106.4	47.6	104.8	78.8	180.8	105.9	40.6	High	High	High	High	High	1
FALSE	High	Master Protein	P14618-2	Isoform M1 of Pyruvate kinase PKM OS=Homo sapiens OX=9606 GN=PKM	0	216.211	62	42	554	1	531	58	7.71	256799		42		0	0	0.805	1.337	0.484	0.187	0.910689	0.899227	0.165238	0.732993	0	0	0	0	201.2	107.5	137	282.6	33.7	67.2	111.5	40.4	83.4	15.6	Peak Found	Peak Found	Peak Found	Peak Found	Peak Found	1
FALSE	High	Master Protein	P49736	DNA replication licensing factor MCM2 OS=Homo sapiens OX=9606 GN=MCM2 PE=1 SV=4	0	211.947	39	36	471	36	904	101.8	5.52	224088	2.48	36	3	0	0	1.564	1.726	0.787	3.529	0.456936	0.484403	0.830285	0.485982	43.62	42.57	34.34	69.94	55.9	86.9	47.2	48.6	121.3	80.1	83.4	46.5	66.4	123.7	High	High	High	High	High	1
FALSE	High	Master Protein	H0YFD6	Enoyl-CoA hydratase OS=Homo sapiens OX=9606 GN=HADHA PE=1 SV=2	0	208.288	48	39	555	39	792	86.3	9.1	264419		39		0	0	1.043	0.928	0.994	0.386	0.990443	0.928323	0.994092	0.916178	34.59	40.13	45.23	61.48	91.1	111	101.3	77	78	146.9	134.4	141.6	137.9	58.6	High	High	High	High	High	1
FALSE	High	Master Protein	A0A087WVQ6	Clathrin heavy chain OS=Homo sapiens OX=9606 GN=CLTC PE=1 SV=1	0	208.19	33	52	422	52	1679	191.9	5.69	187221		52		0	0	1.431	1.482	1.132	0.161	0.622156	0.744	0.944114	0.625161	60.46	57.93	50.08	97.43	129.4	120.2	159.3	97.6	29.7	191.4	174.8	156.4	149.4	20.6	High	High	High	High	High	1
FALSE	High	Master Protein	Q9Y490	Talin-1 OS=Homo sapiens OX=9606 GN=TLN1 PE=1 SV=3	0	207.716	26	55	430	48	2541	269.6	6.07	169727		55		0	8	1.236	1.254	1.353	0.222	0.842968	0.930271	0.777872	0.744374	21.14	30.96	23.76	97.93	96.1	113.3	121.1	96	40.5	151.3	144.4	139.2	115.3	36.9	High	High	High	High	High	1
FALSE	High	Master Protein	P06737	Glycogen phosphorylase, liver form OS=Homo sapiens OX=9606 GN=PYGL PE=1 SV=4	0	204.306	47	45	418	37	847	97.1	7.17	178349		45		0	8	2.522	2.646	1.973	1.178	0.0175836	0.0299628	0.220625	0.883184	45.66	61.67	62.26	70.72	43.5	35.6	64.1	23.7	31.5	154.3	162	113.7	82	82.9	High	High	High	High	High	1
FALSE	High	Master Protein	P21980	Protein-glutamine gamma-glutamyltransferase 2 OS=Homo sapiens OX=9606 GN=TGM2 PE=1 SV=2	0	198.349	51	42	571	42	687	77.3	5.22	243882	14.74	41	2	0	0	0.843	1.042	0.907	0.476	0.772049	0.982067	0.948163	0.950396	36.02	30	45.4	53.07	87.1	117.7	86.9	91.3	80.4	116.4	125.5	112.2	122.2	67.5	High	High	High	High	High	1	Met-loss+Acetyl [N-Term]
FALSE	High	Master Protein	Q16531	DNA damage-binding protein 1 OS=Homo sapiens OX=9606 GN=DDB1 PE=1 SV=1	0	196.746	37	39	452	39	1140	126.9	5.26	249657		39		0	0	1.054	1.151	1.461	0.356	0.998251	0.975441	0.670939	0.892056	30.19	27.17	26.01	96.82	90.2	105.9	103.4	85.8	71.3	127.7	144.3	155.3	134.6	60.1	High	High	High	High	High	1
FALSE	High	Master Protein	P35527	Keratin, type I cytoskeletal 9 OS=Homo sapiens OX=9606 GN=KRT9 PE=1 SV=3	0	196.352	51	38	574	37	623	62	5.24	266497		38		0	0	0.777	0.931	1.067	0.247	0.628988	0.928323	0.981587	0.76838	95.01	68.7	120.53	76.79	220.5	114.3	96.3	127.7	90.1	83.9	143	171.3	190.9	29.4	High	High	High	High	High	1
FALSE	High	Master Protein	P35908	Keratin, type II cytoskeletal 2 epidermal OS=Homo sapiens OX=9606 GN=KRT2 PE=1 SV=2	0	193.268	64	45	469	33	639	65.4	8	223004	2.21	45	1	0	7	0.975	0.882	1.718	0.247	0.919562	0.905479	0.40034	0.76838	33.04	20.51	51.12	47.03	296.9	99.9	86.6	126.9	56.2	98.9	90.2	174.7	100.9	27.4	High	High	High	High	High	1
FALSE	High	Master Protein	Q14974	Importin subunit beta-1 OS=Homo sapiens OX=9606 GN=KPNB1 PE=1 SV=2	0	192.531	43	33	423	33	876	97.1	4.78	195003		33		0	0	2.002	2.991	1.807	6.5	0.121544	0.00952039	0.330381	0.233279	26.67	15.74	23.12	39.33	22.2	27.9	20.1	18.5	185.1	54.7	71.1	41	24	183.3	High	High	High	High	High	1
FALSE	High	Master Protein	P11142	Heat shock cognate 71 kDa protein OS=Homo sapiens OX=9606 GN=HSPA8 PE=1 SV=1	0	191.229	48	34	509	17	646	70.9	5.52	233649		34		0	15	0.786	1.013	1.127	0.349	0.652046	0.973471	0.945686	0.887555	41.32	34.44	41.26	76.18	132.9	129.1	129.4	195	83.6	52.1	67.2	64.4	62.6	39.8	High	High	High	High	High	1
FALSE	High	Master Protein	P33991	DNA replication licensing factor MCM4 OS=Homo sapiens OX=9606 GN=MCM4 PE=1 SV=5	0	190.871	43	36	381	36	863	96.5	6.74	186688		36		0	0	1.136	1.387	0.885	1.234	0.919631	0.847372	0.937923	0.866907	43.11	41.52	41.18	55.81	67.1	107.8	62.8	54.9	122.9	93.3	104.3	70.7	93.4	104	High	High	High	High	High	1
FALSE	High	Master Protein	Q13200	26S proteasome non-ATPase regulatory subunit 2 OS=Homo sapiens OX=9606 GN=PSMD2 PE=1 SV=3	0	189.549	40	39	470	39	908	100.1	5.2	209754		39		0	0	1.306	1.867	1.869	0.815	0.78199	0.328529	0.286844	0.959467	20.47	11.14	30.73	49.48	50.9	43	49.5	36.2	60.2	100	137.9	126.2	65.5	65.9	High	High	High	High	High	1
FALSE	High	Master Protein	Q7KZF4	Staphylococcal nuclease domain-containing protein 1 OS=Homo sapiens OX=9606 GN=SND1 PE=1 SV=1	0	187.594	41	41	604	41	910	101.9	7.17	298331		41		0	0	0.998	1.029	0.984	0.049	0.941572	0.977717	0.98809	0.162875	27.38	28.95	36.26	84.95	99.1	128.7	111.8	96.5	14	149.2	160	153.4	179	7.9	High	High	High	High	High	1
FALSE	High	Master Protein	Q92900	Regulator of nonsense transcripts 1 OS=Homo sapiens OX=9606 GN=UPF1 PE=1 SV=2	0	185.199	45	47	426	47	1129	124.3	6.61	177894		47		0	0	1.12	1.127	0.94	0.269	0.93705	0.982067	0.974781	0.800123	31.96	24.47	60.23	59.58	82.3	97.9	85.4	75.9	39.7	141.6	139.9	134.5	121.2	100.7	High	High	High	High	High	1
FALSE	High	Master Protein	Q01813	ATP-dependent 6-phosphofructokinase, platelet type OS=Homo sapiens OX=9606 GN=PFKP PE=1 SV=2	0	182.821	44	37	481	29	784	85.5	7.55	205280		37		0	11	1.241	1.178	1.095	0.959	0.837433	0.966355	0.95816	0.930398	49.18	55.84	33.9	89.56	76.4	94.4	82.4	73.6	114.8	120.9	120.4	116	102.1	104.4	High	High	High	High	High	1
FALSE	High	Master Protein	O43143	Pre-mRNA-splicing factor ATP-dependent RNA helicase DHX15 OS=Homo sapiens OX=9606 GN=DHX15 PE=1 SV=2	0	180.724	41	36	512	35	795	90.9	7.46	237503		36		0	3	1.362	0.771	0.252	0.569	0.713855	0.701793	0.000926721	0.978433	44.37	47.18	45.97	78.63	108.7	114.4	95.4	91.4	99.8	166.5	86	25.6	118.7	71.7	High	High	High	High	High	1
FALSE	High	Master Protein	Q15149	Plectin OS=Homo sapiens OX=9606 GN=PLEC PE=1 SV=3	0	180.582	13	58	295	57	4684	531.5	5.96	114223		58		0	1	0.929	0.951	1.257	0.176	0.885765	0.944802	0.851197	0.655146	47.05	31.12	36.32	121.5	112.6	111.1	125.4	136.7	23.6	140.3	146.1	163.8	155.8	22.6	High	High	High	High	High	1
FALSE	High	Master Protein	Q13813	Spectrin alpha chain, non-erythrocytic 1 OS=Homo sapiens OX=9606 GN=SPTAN1 PE=1 SV=3	0	175.783	24	57	354	57	2472	284.4	5.35	124264		57		0	0	1.205	1.014	1.085	0.123	0.86985	0.973471	0.969247	0.522639	37.84	36.79	39.02	100.58	115.7	122.8	137	110.9	33.9	170.9	152.1	172.3	149.3	32.9	High	High	High	High	High	1
FALSE	High	Master Protein	A2A274	Aconitate hydratase, mitochondrial OS=Homo sapiens OX=9606 GN=ACO2 PE=1 SV=1	0	174.331	43	35	431	35	805	87.8	7.37	205754		35		0	0	1.082	1.074	0.893	0.495	0.966943	0.997302	0.942415	0.959467	21.24	22.02	48.02	57.8	89.9	115.7	92.3	86.6	66.2	141.1	126.4	118.8	115.5	65.6	High	High	High	High	High	1
FALSE	High	Master Protein	Q14566	DNA replication licensing factor MCM6 OS=Homo sapiens OX=9606 GN=MCM6 PE=1 SV=1	0	173.081	45	38	316	38	821	92.8	5.41	159552		38		0	0	1.549	1.57	0.49	2.192	0.468161	0.660566	0.175357	0.671479	27.93	27.67	28.6	57.73	26	69.3	28	25.2	55.2	34.7	31.6	15.1	22.9	46.7	High	High	Peak Found	High	High	1
FALSE	High	Master Protein	P29401	Transketolase OS=Homo sapiens OX=9606 GN=TKT PE=1 SV=3	0	172.356	49	36	422	36	623	67.8	7.66	203138		36		0	0	0.576	0.957	0.826	0.1	0.158828	0.950433	0.881538	0.426825	31.19	26.88	44.7	33.47	164.8	161.4	189.7	233	31.3	50.9	79.9	72.3	84.9	11.8	High	High	High	High	High	1
FALSE	High	Master Protein	P41250	Glycine--tRNA ligase OS=Homo sapiens OX=9606 GN=GARS1 PE=1 SV=3	0	171.84	37	35	399	35	739	83.1	7.03	200305	5.23	35	1	0	0	0.873	1.048	0.703	0.865	0.834427	0.986731	0.690125	0.945406	12.37	10.76	22.71	31.95	70	113.6	60.7	93.8	128.6	87	94.2	60.3	92.8	78.4	High	High	High	High	High	1
FALSE	High	Master Protein	Q14152	Eukaryotic translation initiation factor 3 subunit A OS=Homo sapiens OX=9606 GN=EIF3A PE=1 SV=1	0	171.245	25	38	300	38	1382	166.5	6.79	146529		38		0	0	1.702	2.007	0.821	7.91	0.323079	0.217198	0.875517	0.172474	28.89	57.85	38.59	58.92	18.4	42.2	15.5	17.4	130.9	21.8	25.5	8.9	12.5	128.6	High	High	High	Peak Found	High	1
FALSE	High	Master Protein	P27824	Calnexin OS=Homo sapiens OX=9606 GN=CANX PE=1 SV=2	0	165.932	45	36	314	35	592	67.5	4.6	130578		36		0	1	1.789	1.447	1.215	10.897	0.248226	0.783423	0.891036	0.098929	44.91	39.77	35.12	42.67	35.2	41.9	28.5	43.5	331.4	42.2	33.4	24.8	19.2	357.3	High	High	High	High	High	1
FALSE	High	Master Protein	A0A669KAX4	Cullin-4B OS=Homo sapiens OX=9606 GN=CUL4B PE=1 SV=1	0	165.737	36	40	505	27	897	102.5	8.06	231065		40		0	15	1.092	1.058	1.029	0.447	0.959223	0.99227	0.98809	0.938465	35.85	18.14	41.92	46.18	87.1	117.2	96.4	86.1	72.6	133.7	132.8	123.6	117	64.3	High	High	High	High	High	1
FALSE	High	Master Protein	P15311	Ezrin OS=Homo sapiens OX=9606 GN=EZR PE=1 SV=4	0	164.693	42	35	227	20	586	69.4	6.27	109743		35		0	2	1.571	1.107	1.152	14.55	0.449208	0.99547	0.937923	0.058003	39.13	29.64	26.34	108.66	44.3	59	43.7	40.9	573.8	43.5	27.2	23.7	15.6	439.8	High	Peak Found	Peak Found	High	High	1
FALSE	High	Master Protein	P23921	Ribonucleoside-diphosphate reductase large subunit OS=Homo sapiens OX=9606 GN=RRM1 PE=1 SV=1	0	161.615	41	33	416	33	792	90	7.15	209121	2.01	33	2	0	0	0.968	1.249	1.029	0.842	0.910698	0.932279	0.98809	0.953907	52.16	34.43	29.79	75.57	68	99.6	66.3	64.1	96.6	104.5	117.2	97	92.5	97.4	High	High	High	High	High	1
FALSE	High	Master Protein	P49588	Alanine--tRNA ligase, cytoplasmic OS=Homo sapiens OX=9606 GN=AARS1 PE=1 SV=2	0	159.618	37	35	426	35	968	106.7	5.53	174551		35		0	0	1.419	1.179	1.562	0.148	0.637873	0.966216	0.559063	0.588878	24.12	28.66	33.88	49.46	75.6	81.1	118.5	67.3	49.3	148	126.7	144.3	95.4	73.9	High	High	High	High	High	1
FALSE	High	Master Protein	Q99460	26S proteasome non-ATPase regulatory subunit 1 OS=Homo sapiens OX=9606 GN=PSMD1 PE=1 SV=2	0	159.471	46	37	262	37	953	105.8	5.39	102799		37		0	0	1.321	1.378	0.831	0.977	0.759754	0.853559	0.887521	0.924736	42.37	65.85	41.7	63.51	65.3	107.5	67.3	66.6	89.4	74.2	73	41.8	56.6	61.6	High	High	High	High	High	1
FALSE	High	Master Protein	P55884	Eukaryotic translation initiation factor 3 subunit B OS=Homo sapiens OX=9606 GN=EIF3B PE=1 SV=3	0	158.564	41	33	475	33	814	92.4	5	227189		33		0	0	1.11	1.141	1.052	0.337	0.941572	0.977717	0.983729	0.876395	36.12	51.92	57.74	74.34	93.4	107.1	93.6	82.3	53.8	147.3	135.3	116.7	121.6	50.2	High	High	High	High	High	1
FALSE	High	Master Protein	P07384	Calpain-1 catalytic subunit OS=Homo sapiens OX=9606 GN=CAPN1 PE=1 SV=1	0	158.35	38	34	470	33	714	81.8	5.67	230810		34		0	1	0.979	0.891	1.009	0.386	0.924253	0.913175	0.999529	0.916178	28.97	35.61	40.78	50.97	85.3	110.4	87.8	76	72.8	136.4	124.4	115.9	126.9	66.3	High	High	High	High	High	1
FALSE	High	Master Protein	P04259	Keratin, type II cytoskeletal 6B OS=Homo sapiens OX=9606 GN=KRT6B PE=1 SV=5	0	158.209	53	40	319	4	564	60	8	145668	6.6	38	2	0	0	0.412	1.082	1.242	0.324	0.00903764	0.999777	0.86728	0.863702	73.76	5.36	79.5	48.85	88.7	25.5	97.5	70	10.5	18.8	36.5	67.7	85.1	37.1	High	High	High	High	High	1	Met-loss+Acetyl [N-Term]
FALSE	High	Master Protein	P52888	Thimet oligopeptidase OS=Homo sapiens OX=9606 GN=THOP1 PE=1 SV=2	0	157.725	44	32	401	31	689	78.8	6.05	190313	2.57	32	1	0	1	0.942	0.829	0.776	0.374	0.888859	0.809643	0.830285	0.908475	21.6	17.98	34.31	31.47	101.4	121.1	96	101.8	63.4	134.9	119.4	100.9	141.1	62.4	High	High	High	High	High	1
FALSE	High	Master Protein	P02538	Keratin, type II cytoskeletal 6A OS=Homo sapiens OX=9606 GN=KRT6A PE=1 SV=3	0	157.606	53	40	331	3	564	60	8	156516	6.6	38	2	0	30	0.561	0.945	2.189	0.274	0.133054	0.936896	0.128297	0.803833	58.63	47.52	88.43	71.49	89.9	42.7	116.3	104	24.1	46.3	63.9	149.6	111.6	206.7	High	High	High	High	High	1	Met-loss+Acetyl [N-Term]
FALSE	High	Master Protein	Q96QK1	Vacuolar protein sorting-associated protein 35 OS=Homo sapiens OX=9606 GN=VPS35 PE=1 SV=2	0	155.973	37	30	498	30	796	91.6	5.49	238612		30		0	0	0.986	0.881	0.928	0.352	0.932166	0.903362	0.962898	0.888402	25.14	14.31	38.71	40.2	98.3	119.5	103.7	93.4	61.7	143.4	123.7	123.5	125.2	57.5	High	High	High	High	High	1
FALSE	High	Master Protein	P02786	Transferrin receptor protein 1 OS=Homo sapiens OX=9606 GN=TFRC PE=1 SV=2	0	150.204	44	33	441	33	760	84.8	6.61	194921		33		0	0	1.318	1.085	0.662	0.633	0.764578	0.99982	0.59596	0.997645	38.75	33.78	37.72	103.08	90.7	115	99.6	90.2	67.7	136.2	105.3	67.7	104.2	69.8	High	High	High	High	High	1
FALSE	High	Master Protein	P35606	Coatomer subunit beta' OS=Homo sapiens OX=9606 GN=COPB2 PE=1 SV=2	0	149.149	42	34	338	34	906	102.4	5.27	156634		34		0	0	1.311	1.441	1.452	0.518	0.773031	0.78579	0.676599	0.964745	21.8	22.38	52	42.08	86.4	89.3	101.8	63.2	75.2	139.4	153.3	166.9	94.4	63.1	High	High	High	High	High	1
FALSE	High	Master Protein	Q13619	Cullin-4A OS=Homo sapiens OX=9606 GN=CUL4A PE=1 SV=3	0	145.967	40	33	377	20	759	87.6	8.13	190536	0	33	1	0	0	0.951	0.99	1.077	0.432	0.900153	0.961298	0.974781	0.932011	10.68	16.78	46.58	32.59	98	113.3	101.9	88.1	81.1	118.4	130.4	142	125.7	57.4	High	High	High	High	High	1
FALSE	High	Master Protein	P78386	Keratin, type II cuticular Hb5 OS=Homo sapiens OX=9606 GN=KRT85 PE=1 SV=1	0	141.417	49	30	112	9	507	55.8	6.55	63618	2.42	30	1	0	1	0.941		4.461	46.366	0.986591		0.000306479	0.00394274	0		313.8	130.96	1.9	19.8	4.8	3.2		2	1.2	59.2	2.4	906.5	Peak Found	Peak Found	High	Peak Found	High	1
FALSE	High	Master Protein	P78385	Keratin, type II cuticular Hb3 OS=Homo sapiens OX=9606 GN=KRT83 PE=1 SV=2	0	136.796	43	30	117	10	493	54.2	5.64	67447		30		0	20	1.314	2.027	4.928	100	0.771063	0.203872	9.50476e-05	4.08942e-17	65.96	94.8	221.09	140.34	5.1	24.1	4.6	4.7	1	5.8	6.2	52.1	3.1	986.7	Peak Found	Peak Found	High	Peak Found	High	1
FALSE	High	Master Protein	P04406	Glyceraldehyde-3-phosphate dehydrogenase OS=Homo sapiens OX=9606 GN=GAPDH PE=1 SV=3	0	135.025	53	27	308	27	335	36	8.46	137488		27		0	0	0.463	0.854	0.813	0.143	0.0292074	0.853983	0.862342	0.573413	62.79	42.56	48.25	96.19	161.4	148.8	199.6	235	33.6	40.3	68.3	57.9	80.1	13.4	High	High	High	High	High	1
FALSE	High	Master Protein	P11498	Pyruvate carboxylase, mitochondrial OS=Homo sapiens OX=9606 GN=PC PE=1 SV=2	0	133.828	32	35	221	35	1178	129.6	6.84	97145		35		0	0	1.246	1.541	0.928	0.91	0.834909	0.693521	0.963817	0.9369	33.96	53	41.44	95.45	56.9	79.1	54.5	38.9	62.7	90.5	101.3	61.4	65.7	74	High	High	High	High	High	1
FALSE	High	Master Protein	P12814	Alpha-actinin-1 OS=Homo sapiens OX=9606 GN=ACTN1 PE=1 SV=2	0	133.291	37	32	274	12	892	103	5.41	105638		32		0	0	1.251	1.535	0.979	0.253	0.834909	0.696203	0.987491	0.77981	72.03	53.69	59.26	107.35	128	105.8	109.5	159.8	35.9	115.1	123	115	103.1	19.8	High	High	High	High	High	1
FALSE	High	Master Protein	P05556	Integrin beta-1 OS=Homo sapiens OX=9606 GN=ITGB1 PE=1 SV=2	0	131.86	33	26	452	26	798	88.4	5.39	217089	0	26	2	0	0	1.182	1.138	1.328	0.453	0.888859	0.977717	0.81187	0.941437	24.14	24.57	54.61	36	84.3	89.1	98.9	85.3	52.8	142.2	133.2	131.5	128.7	58.7	High	High	High	High	High	1
FALSE	High	Master Protein	A0A0G2JIW1	Heat shock 70 kDa protein 1B OS=Homo sapiens OX=9606 GN=HSPA1B PE=1 SV=1	0	131.107	41	27	319	21	642	70.1	5.66	153726		27		0	1	1.005	1.29	1.028	0.745	0.949013	0.918663	0.98809	0.970422	79.15	74.93	44.42	105.21	148.5	150.8	163.9	248.4	76.3	53	62.8	55.2	68.9	36.6	High	High	High	High	High	1
FALSE	High	Master Protein	P16615	Sarcoplasmic/endoplasmic reticulum calcium ATPase 2 OS=Homo sapiens OX=9606 GN=ATP2A2 PE=1 SV=1	0	129.649	31	32	308	32	1042	114.7	5.34	123963		32		0	0	1.203	1.209	1.475	0.546	0.872843	0.95948	0.653836	0.970634	26.15	16.61	32.02	39.49	70.6	85.9	96.4	56.2	94.7	123.1	125.1	132.6	106.3	69.7	High	High	High	High	High	1
FALSE	High	Master Protein	P13647	Keratin, type II cytoskeletal 5 OS=Homo sapiens OX=9606 GN=KRT5 PE=1 SV=3	0	129.559	45	33	305	17	590	62.3	7.74	140220		33		0	0	0.686	0.684	1.165	0.279	0.404937	0.491318	0.932752	0.812168	50.22	29.28	60.71	37.11	134.1	87.6	154	91.4	55.8	81	115.4	153.7	146.9	51.1	High	High	High	High	High	1
FALSE	High	Master Protein	Q02809	Procollagen-lysine,2-oxoglutarate 5-dioxygenase 1 OS=Homo sapiens OX=9606 GN=PLOD1 PE=1 SV=2	0	127.256	43	28	275	1	727	83.5	6.95	135504		28		0	0	100	100		100	6.56722e-17	6.63153e-17		4.08942e-17								61.9		51	59			381.5	Peak Found	Peak Found	Not Found	Not Found	High	1
[truncated: 1,282 more rows]

## Sheet: ReplicateC
Checked	Protein FDR Confidence: Combined	Master	Accession	Description	Exp. q-value: Combined	Sum PEP Score	Coverage [%]	# Peptides	# PSMs	# Unique Peptides	# AAs	MW [kDa]	calc. pI	Score MSPepSearch: MSPepSearch	Score Sequest HT: Sequest HT	# Peptides (by Search Engine): MSPepSearch	# Peptides (by Search Engine): Sequest HT	# Protein Pathway Groups	# Razor Peptides	Abundance Ratio: (B4_D4_100uM_1a500) / (B4_D4_CTRL_1a500)	Abundance Ratio: (B4_D4_10uM_1a500) / (B4_D4_CTRL_1a500)	Abundance Ratio: (B4_D4_1uM_1a500) / (B4_D4_CTRL_1a500)	Abundance Ratio: (B4_D4_lisato) / (B4_D4_CTRL_1a500)	Abundance Ratio Adj. P-Value: (B4_D4_100uM_1a500) / (B4_D4_CTRL_1a500)	Abundance Ratio Adj. P-Value: (B4_D4_10uM_1a500) / (B4_D4_CTRL_1a500)	Abundance Ratio Adj. P-Value: (B4_D4_1uM_1a500) / (B4_D4_CTRL_1a500)	Abundance Ratio Adj. P-Value: (B4_D4_lisato) / (B4_D4_CTRL_1a500)	Abundance Ratio Variability [%]: (B4_D4_100uM_1a500) / (B4_D4_CTRL_1a500)	Abundance Ratio Variability [%]: (B4_D4_10uM_1a500) / (B4_D4_CTRL_1a500)	Abundance Ratio Variability [%]: (B4_D4_1uM_1a500) / (B4_D4_CTRL_1a500)	Abundance Ratio Variability [%]: (B4_D4_lisato) / (B4_D4_CTRL_1a500)	Abundances (Grouped): B4_D4_100uM_1a500	Abundances (Grouped): B4_D4_10uM_1a500	Abundances (Grouped): B4_D4_1uM_1a500	Abundances (Grouped): B4_D4_CTRL_1a500	Abundances (Grouped): B4_D4_lisato	Found in Sample: [S8] F8: Sample, B4_D4_100uM_1a500	Found in Sample: [S7] F7: Sample, B4_D4_10uM_1a500	Found in Sample: [S6] F6: Sample, B4_D4_1uM_1a500	Found in Sample: [S9] F9: Sample, B4_D4_CTRL_1a500	Found in Sample: [S10] F10: Sample, B4_D4_lisato	# Protein Groups	Modifications
[truncated: 1,018 more rows]
